# Supplementary material
Source: publisher site journal article supplement (https://www.spandidos-publications.com/1496/downloadSupplementary)
Supplement: Supplementary file 1 [file downloadSupplementary]

## Sheet: >1.1 FC
Table SI. Complete microarray results.
ProbeID	p (Corr)	p	FC (abs)	Regulation	Symbol	Entrez_Gene_ID	Definition	Ontology_Process	Ontology_Component	Ontology_Function	Chromosome	Chromosome Start Index(Avadis)	Chromosome End Index(Avadis)	Probe_Sequence
1300239	0.00251891	0.000124891	1.38093	down	TRIM44	54765	Homo sapiens tripartite motif-containing 44 (TRIM44), mRNA.				chr11	35786070	35786119	CCTGCCTGTCTGCCTGTGACCTGTGTACGTATTACAGGCTTTAGGACCAG
4230136	0.0238915	0.00251342	1.2551	down	TCP1	6950	Homo sapiens t-complex 1 (TCP1), transcript variant 1, mRNA.				chr6	160199673	160199722	GCCCAAGGCTATAGCCCCTCCTTCAATATTGACCTAACGGGGGAGAAAAG
4760255	0.0061504	0.000403011	1.32547	down	ARHGDIA	396	Homo sapiens Rho GDP dissociation inhibitor (GDI) alpha (ARHGDIA), mRNA.	GO:0006916|GO:0006928|GO:0007162|GO:0007266	GO:0005737|GO:0005856	GO:0005094|GO:0005096|GO:0042802	chr17	79825722	79825771	CAGGCCTTCCCTGACCCAGCCAGGAACAAACAAGGGACCAAGTGCACACA
540717	0.0167782	0.00153757	1.26384	down	LONP1	9361	Homo sapiens lon peptidase 1, mitochondrial (LONP1), nuclear gene encoding mitochondrial protein, mRNA.	GO:0006510	GO:0005737|GO:0005739|GO:0005759	GO:0000166|GO:0003677|GO:0004176|GO:0004252|GO:0005524|GO:0008233|GO:0017111	chr19	5692097	5692146	TTCATCACCGAGGGCCTGGAGGTGCACTTCGTGGAACACTACCGGGAGAT
2850433	0.000661402	2.11615e-05	1.39654	up	SPSB3	90864	Homo sapiens splA/ryanodine receptor domain and SOCS box containing 3 (SPSB3), mRNA.	GO:0007242|GO:0007242		GO:0004872	chr16	1826790	1826839	TGGAGCCCGCGTTGCTGTTCCCACAGGGCCTCGGTTTTTCCTAACTTGCT
2810327	0.033673	0.00401336	1.28272	up	GIT2	9815	Homo sapiens G protein-coupled receptor kinase interactor 2 (GIT2), transcript variant 3, mRNA.	GO:0008277|GO:0032312	GO:0005654	GO:0005515|GO:0008060|GO:0008270|GO:0046872	chr12	108875408	108882069	GGAGACAGCAGGGCAGTTCTCTCTCGGGTTCAAAAGACAATGTGGAGCTC
5360398	0.00136295	5.50868e-05	1.38551	down	ERI1	90459	Homo sapiens exoribonuclease 1 (ERI1), mRNA.				chr8	8890610	8890659	CCACCAACCTGTATATCAAGCCTCCTTGCCCCACAAAGCTTCCAAAGCCC
130717	0.00354695	0.000196719	2.01539	up	ARPC1B	10095	Homo sapiens actin related protein 2/3 complex, subunit 1B, 41kDa (ARPC1B), mRNA.	GO:0006928|GO:0030833	GO:0005737|GO:0005885	GO:0003779|GO:0005200|GO:0005515	chr7	98821298	98822253	GAGCCCATCAGCTGCCACGCCTGGAACAAGGACCGCACCCAGATTGCCAT
110427	0.0050099	0.000306252	1.36848	up	TCEA1	6917	Homo sapiens transcription elongation factor A (SII), 1 (TCEA1), transcript variant 2, mRNA.	GO:0006354|GO:0030218|GO:0045944	GO:0005634|GO:0005654|GO:0005654|GO:0005654	GO:0003677|GO:0003711|GO:0003746|GO:0005515|GO:0008270|GO:0016251|GO:0046872	chr8	55054168	55054217	CAGATGGCCAAGACTGGTGGGACCCAGACTGACTTGTTCACATGTGGCAA
2060112	0.0247719	0.00264148	1.23573	up	CCNYL1	151195	Homo sapiens cyclin Y-like 1 (CCNYL1), mRNA.				chr2	208327139	208327188	GGAGCAGACAGCAGCGTTGTTAGGTACTGAAGGGTTCTTCCTCCCTACTG
1450731	0.00548533	0.000346356	1.30104	up	KIAA1217	56243	Homo sapiens KIAA1217 (KIAA1217), transcript variant 2, mRNA.				chr10	24820795	24820844	GCAAGTGTGGTGCCTTGGATGTGGCCTGTTGGCTCGCTTTCTTCTCTGTG
1260543	0.000366342	9.89693e-06	1.52075	down	ARHGAP21	57584	Homo sapiens Rho GTPase activating protein 21 (ARHGAP21), mRNA.	GO:0007165|GO:0007165|GO:0007165	GO:0005622|GO:0005622|GO:0000139|GO:0005622|GO:0005737|GO:0005794|GO:0005856|GO:0016020|GO:0030054|GO:0030659|GO:0031410	GO:0005515|GO:0005515|GO:0005096|GO:0005515	chr10	24912583	24912632	GCATGAGGACTTAATGAATCCAAACCTGTGTCATGCCTGTGTGCATACCC
4250768	9.65672e-05	1.78525e-06	1.52549	down	COIL	8161	Homo sapiens coilin (COIL), mRNA.				chr17	55015688	55015737	CAGGCACCTGGCTGAGTGTGCTGGAGTGAGGATCTTGAACAGAAACTTCC
160612	0.00303133	0.000159933	1.85005	up	MGLL	11343	Homo sapiens monoglyceride lipase (MGLL), transcript variant 1, mRNA.	GO:0006629|GO:0006954		GO:0004622|GO:0016787|GO:0047372|GO:0016787|GO:0016787	chr3	129023857	129023906	GCCTGGTTCTGATTCTCCAGGCTGTCGTGGTTGTGGAATGCAAACGCCAG
2600646	0.00417001	0.000242982	1.70642	up	WDR45L	56270	Homo sapiens WDR45-like (WDR45L), mRNA.				chr17	78166351	78166400	GCCTGTGGTCTTCTCCGTACCCGCAACGTGGTCATCTGTGCCCGTGACGT
6200390	0.0017847	8.10195e-05	1.36561	down	PRIM1	5557	Homo sapiens primase, DNA, polypeptide 1 (49kDa) (PRIM1), mRNA.	GO:0006260|GO:0006269|GO:0006350	GO:0005654|GO:0005654|GO:0005654|GO:0005658	GO:0003896|GO:0005515|GO:0008270|GO:0016740|GO:0016779|GO:0046872	chr12	57135284	57135333	ACCCTGGCTGGAGTGGGAGATTATGCTCCAGTACTGTTTTCCACGGCTGG
4060722	0.0065749	0.000441275	1.29701	down	PHB2	11331	Homo sapiens prohibitin 2 (PHB2), transcript variant 2, mRNA.	GO:0006355|GO:0016481	GO:0005634|GO:0005737|GO:0005739|GO:0005743|GO:0016020	GO:0004872|GO:0005515|GO:0005515|GO:0005515|GO:0005515|GO:0016566|GO:0030331	chr12	7074810	7074859	GGGTAAGAAATGAGCCTAGTCACCAAGAACTCCACCCCCAGAGGAAGTGG
1660270	0.00692779	0.000472295	1.27761	down	MTHFD1	4522	Homo sapiens methylenetetrahydrofolate dehydrogenase (NADP+ dependent) 1, methenyltetrahydrofolate cyclohydrolase, formyltetrahydrofolate synthetase (MTHFD1), mRNA.	GO:0000105|GO:0006164|GO:0006548|GO:0006730|GO:0008652|GO:0009086|GO:0009396|GO:0055114	GO:0005737|GO:0005739	GO:0000166|GO:0004329|GO:0004477|GO:0004488|GO:0005515|GO:0005524|GO:0016155|GO:0016491|GO:0016787|GO:0016874	chr14	63991334	63994721	CTTAGTAGGAACGATGAGCACAATGCCTGGACTCCCCACCCGGCCCTGTT
2370424	0.00282737	0.000145277	1.39878	down	CCDC74B	91409	Homo sapiens coiled-coil domain containing 74B (CCDC74B), mRNA.				chr2	130897109	130897158	AGAAACGGCGCCTGCATCGCTCGGTGCTTTGAGCTACCCGCATCTGGTCA
2260215	0.0354208	0.00429673	1.22506	down	CASP3	836	Homo sapiens caspase 3, apoptosis-related cysteine peptidase (CASP3), transcript variant beta, mRNA.	GO:0006508|GO:0006915|GO:0001782|GO:0001836|GO:0006309|GO:0006508|GO:0006917|GO:0007507|GO:0007605|GO:0008625|GO:0008631|GO:0009411|GO:0009611|GO:0030216|GO:0030264|GO:0030889|GO:0043029|GO:0043066|GO:0045165|GO:0045736|GO:0046007|GO:0051402	GO:0005634|GO:0005730|GO:0005737|GO:0005739|GO:0005634|GO:0005654|GO:0005730|GO:0005737|GO:0005739|GO:0005829|GO:0005829|GO:0005829|GO:0005829|GO:0005829|GO:0005829|GO:0005829|GO:0005829|GO:0005829|GO:0005829|GO:0005829|GO:0005886|GO:0005886	GO:0004197|GO:0004197|GO:0004861|GO:0005515|GO:0008233	chr4	185786039	185786088	GTGCGGAGCCGTCACTGCACCAAGTCTCACTGGCTGTCAGTATGACATTT
6420465	0.000802359	2.669e-05	1.38055	up	GABARAPL1	23710	Homo sapiens GABA(A) receptor-associated protein like 1 (GABARAPL1), mRNA.		GO:0005622|GO:0005737|GO:0005776|GO:0005783|GO:0005794|GO:0005874|GO:0016020	GO:0005515|GO:0005515|GO:0048487|GO:0050811	chr12	10266658	10266707	CCCTTCAGGCTCACATGCACAGGAATGCTACATGATGGCCAGCTGCTTCC
3890192	0.0183082	0.001735	1.26588	down	DDX46	9879	Homo sapiens DEAD (Asp-Glu-Ala-Asp) box polypeptide 46 (DDX46), mRNA.				chr5	134164408	134164457	TGGCAGTCCCACATCGATGATAATTGGTGCTCCCTTCATCCAACTGGATC
2940435	1.64427e-10	4.35498e-14	2.64674	down	TFRC	7037	Homo sapiens transferrin receptor (p90, CD71) (TFRC), mRNA.	GO:0006879|GO:0006897	GO:0005576|GO:0005768|GO:0005886|GO:0005887|GO:0016023|GO:0042470|GO:0048471	GO:0004872|GO:0004998	chr3	197260755	197260804	GCTCCTGGTCTTGAGATGTCTTCTCGTTAAGGAGTAGGGCCTTTTGGAGG
6220382	0.000632261	1.99277e-05	1.69507	up	CD68	968	Homo sapiens CD68 molecule (CD68), transcript variant 1, mRNA.		GO:0005624|GO:0005765|GO:0005768|GO:0005886|GO:0016021		chr17	7423878	7423927	CACAAAAAATCAGCTACTTTGCTGCCATCCTTCACGGTGACACCCACGGT
6450538	0.00351076	0.000193224	1.31951	down	TCERG1	10915	Homo sapiens transcription elongation regulator 1 (TCERG1), transcript variant 1, mRNA.	GO:0006350|GO:0006355|GO:0006366	GO:0005634	GO:0003702|GO:0003713|GO:0005515	chr5	145850284	145851072	GAACTTGCCAGATGCAAATACCACAGACTCCAAGAAAACCCGAGTTGGGG
6270706	8.80166e-05	1.57122e-06	1.65522	down	SMG7	9887	Homo sapiens Smg-7 homolog, nonsense mediated mRNA decay factor (C. elegans) (SMG7), transcript variant 1, mRNA.	GO:0000184|GO:0006406|GO:0035303	GO:0005634|GO:0005737	GO:0005515|GO:0051721	chr1	181789650	181789699	CCAGGTTTACCATCTCACTCCCAGTAATACCCAGCTCCTATCTAAAGCCC
7550348	0.0013277	5.3193e-05	1.41851	down	NUP188	23511	Homo sapiens nucleoporin 188kDa (NUP188), mRNA.	GO:0015031|GO:0051028|GO:0065002	GO:0005634|GO:0005635|GO:0005643	GO:0005515	chr9	130808945	130808994	CTAGATGAAGAGGTCAACAGCAGGCATGGGGAGCCGAGTCTTCTGTGCTC
240546	0.023887	0.00251169	1.31335	up	SCAND1	51282	Homo sapiens SCAN domain containing 1 (SCAND1), transcript variant 2, mRNA.	GO:0006355	GO:0005634	GO:0003700|GO:0003713|GO:0042802	chr20	34542098	34542147	AGAAACTGGAAGGAGCCGGTTCGAGCTCAGCCCCTGAGCGTAACTGTGTG
5360392	0.0194424	0.00188369	1.2471	up	TP53INP2	58476	Homo sapiens tumor protein p53 inducible nuclear protein 2 (TP53INP2), mRNA.		GO:0005634		chr20	32764601	32764650	TGCAGACACACCATAGCCCCCTTCTACTACTTTCCCTCTCGCCCTGCCAC
6900450	0.015709	0.00140796	1.24514	up	QDPR	5860	Homo sapiens quinoid dihydropteridine reductase (QDPR), mRNA.	GO:0008152|GO:0006520|GO:0006559|GO:0006729|GO:0051066|GO:0055114	GO:0005737	GO:0004155|GO:0005488|GO:0016491|GO:0004155|GO:0005488|GO:0009055|GO:0016491	chr4	17097498	17097547	GGTGTCATGTTGGATCGCTTTGTGACTGTTCATCTGTCCTTGACAGTGGC
2470465	0.00256006	0.000127339	1.32149	down	TRAF2	7186	Homo sapiens TNF receptor-associated factor 2 (TRAF2), mRNA.	GO:0007165|GO:0030163|GO:0042981|GO:0046328|GO:0051023|GO:0007165|GO:0030163|GO:0046328|GO:0051023|GO:0002726|GO:0006461|GO:0007165|GO:0007250|GO:0008633|GO:0032743|GO:0042981|GO:0050870	GO:0005737|GO:0005829|GO:0005829	GO:0004872|GO:0005515|GO:0008270|GO:0046872|GO:0004872|GO:0005515|GO:0008270|GO:0046872|GO:0004872|GO:0005515|GO:0008270|GO:0046872|GO:0004872|GO:0005515|GO:0008270|GO:0046872|GO:0004871|GO:0005515|GO:0005515|GO:0008270|GO:0046872	chr9	138940540	138940589	GGAGCACAGTGGATGGCCTTGTGTCCCTCGGGCATGACAGGCAGAAACGA
4050382	0.00700118	0.00048064	1.28601	down	CCDC109A	90550	Homo sapiens coiled-coil domain containing 109A (CCDC109A), mRNA.		GO:0016020|GO:0016021		chr10	74317161	74317210	CTTCTCCCTCCACCACCCCCAGTCGTCAGCTCCTTCCCTCATTTATTTTT
2350315	0.00305923	0.000162215	1.34131	up	DCTN1	1639	Homo sapiens dynactin 1 (p150, glued homolog, Drosophila) (DCTN1), transcript variant 2, mRNA.	GO:0007067|GO:0007399	GO:0000922|GO:0005737|GO:0005856|GO:0005874|GO:0030286	GO:0003774|GO:0005515|GO:0005515	chr2	74441811	74441860	CCACCAAAGGTTAAGTGAGGTCCCCTTGATTGAGGACTTCACCCCTTGAT
2680703	0.0169795	0.00156902	1.33561	down	SENP5	205564	Homo sapiens SUMO1/sentrin specific peptidase 5 (SENP5), mRNA.	GO:0006508|GO:0006511|GO:0007049|GO:0051301	GO:0005634	GO:0008233|GO:0008234	chr3	196661213	196661262	GCCATAACGGGGTTCTGGGCAGGTCAGACTCTTCAGCAAGACAGTGTATT
940152	0.000806478	2.68712e-05	1.40588	up	MKNK2	2872	Homo sapiens MAP kinase interacting serine/threonine kinase 2 (MKNK2), transcript variant 1, mRNA.	GO:0006417|GO:0006468|GO:0007166|GO:0007243		GO:0000166|GO:0000287|GO:0004674|GO:0005524|GO:0008270|GO:0016740	chr19	1988715	1988764	GGTCAGAACCGTTACTGTGAATGAGTGAAGATCCTGGAGGACCCTGGGCC
6380431	0.00146114	6.04888e-05	1.35765	up	RXRB	6257	Homo sapiens retinoid X receptor, beta (RXRB), mRNA.	GO:0006355|GO:0006350|GO:0006355|GO:0006350|GO:0006355	GO:0005634|GO:0005634|GO:0005634	GO:0003700|GO:0003707|GO:0003700|GO:0003707|GO:0005496|GO:0008270|GO:0043565|GO:0046872|GO:0003700|GO:0003706|GO:0003707|GO:0003713|GO:0004886|GO:0005496|GO:0008270|GO:0043565|GO:0046872	chr6	33269394	33269443	TGCTGGGGCTGCATGATTTTTGCCCTGCGTCCCTTCTCTTTGGGGCTCCT
7150176	0.0239416	0.00252369	1.29144	down	MAT2A	4144	Homo sapiens methionine adenosyltransferase II, alpha (MAT2A), mRNA.	GO:0006556|GO:0006730		GO:0000166|GO:0000287|GO:0004478|GO:0005524|GO:0016740|GO:0030955|GO:0050897	chr2	85625714	85625763	TGGTGCGGCTGGCCATGGAGAAAGCTGACTTGGCTGGTGTGGTACAGAGA
840544	0.0021584	0.000103198	1.45509	up	RBM4	5936	Homo sapiens RNA binding motif protein 4 (RBM4), mRNA.	GO:0006397|GO:0008380|GO:0016068	GO:0005634|GO:0005737	GO:0000166|GO:0003723|GO:0008270|GO:0046872	chr11	66164001	66164050	TGTGGGCAACATCAGTCCCACCTGCACCAATAAGGAGCTTCGAGCCAAGT
520243	0.00882177	0.000660768	1.3508	up	RBM4	5936	Homo sapiens RNA binding motif protein 4 (RBM4), mRNA.	GO:0006397|GO:0008380|GO:0016068	GO:0005634|GO:0005737	GO:0000166|GO:0003723|GO:0008270|GO:0046872	chr11	66164118	66164167	GGCAGAGGATGCAGTGGAGGCCATCAGGGGCCTTGATAACACAGAGTTTC
3290291	0.00528552	0.000329658	1.32583	down	SLBP	7884	Homo sapiens stem-loop binding protein (SLBP), mRNA.	GO:0006397|GO:0006398	GO:0005634|GO:0005654|GO:0005737|GO:0030529	GO:0003729	chr4	1695220	1695269	CTGGCCAGGCACCAAGCATGTGTGTGCACTTGTACCTGGTGGTTTCTCTG
4280603	0.00578559	0.000369912	1.32273	down	SLBP	7884	Homo sapiens stem-loop binding protein (SLBP), mRNA.	GO:0006397|GO:0006398	GO:0005634|GO:0005654|GO:0005737|GO:0030529	GO:0003729	chr4	1694703	1694752	GCACTAGTTAGACTCTTTAGAATACTCCAAGAGTTAGGGCAGCAGAGTGG
1570273	0.0126778	0.00105828	1.28106	down	NEDD4L	23327	Homo sapiens neural precursor cell expressed, developmentally down-regulated 4-like (NEDD4L), mRNA.	GO:0006464|GO:0006511|GO:0006814|GO:0006883|GO:0007588|GO:0010038|GO:0016567|GO:0030104|GO:0042176|GO:0044419|GO:0045807	GO:0005622|GO:0005737	GO:0004842|GO:0005515|GO:0016874|GO:0016881|GO:0017080|GO:0005515	chr18	54216018	54216067	CCCTGCTGTCCTTTTTAACCTGTGTTGTCCTAGACCCTGTCGGGGCAGTC
7200639	0.0005972	1.85379e-05	1.51676	up	RRAD	6236	Homo sapiens Ras-related associated with diabetes (RRAD), mRNA.	GO:0007264		GO:0000166|GO:0003924|GO:0005516|GO:0005525	chr16	65513576	65513625	AACGCACGACGGCAAGCAGGCACCCGGAGGCGAGAGAGCCTTGGCAAAAA
6200195	0.0104033	0.000819866	1.29657	down	WDR34	89891	Homo sapiens WD repeat domain 34 (WDR34), mRNA.				chr9	131396227	131396519	GCTGCCTCTGGGAAAGGTGACGTGCAGCTGTTTGATCTCCAGAAAAGCTC
4900575	6.65299e-07	2.78412e-09	1.78872	down	PTRH2	51651	Homo sapiens peptidyl-tRNA hydrolase 2 (PTRH2), nuclear gene encoding mitochondrial protein, mRNA.	GO:0006915	GO:0005739	GO:0004045|GO:0016787	chr17	57774956	57775005	GGCCAGCCCAAGGTGGTGGTCAAAGCTCCTGATGAAGAAACCCTGATTGC
4850504	0.0191818	0.00184827	1.30104	up	ENTPD3	956	Homo sapiens ectonucleoside triphosphate diphosphohydrolase 3 (ENTPD3), mRNA.	GO:0009134|GO:0009143	GO:0005886|GO:0016021	GO:0000287|GO:0005509|GO:0016787|GO:0017110|GO:0017111	chr3	40444922	40444971	CCCAGATCATAGACCTCTCTGCATAGTAGTCATAGGTCTTGACTTTGGGG
2370441	5.67862e-06	4.48201e-08	1.69748	down	DEPDC1B	55789	Homo sapiens DEP domain containing 1B (DEPDC1B), mRNA.	GO:0007242	GO:0005622	GO:0005096	chr5	59928585	59928634	CTTTGGGTACCCTTAGACCTCTGATTCTAAGTCAAATGCAAATGGGTTAA
60706	0.0375347	0.00465257	1.29179	up	SDCCAG3	10807	Homo sapiens serologically defined colon cancer antigen 3 (SDCCAG3), transcript variant 3, mRNA.		GO:0005737		chr9	139297076	139297125	TTGATCGCAAGAGTCCAGTGTCGTGCCCTCAGCCAGTTCTTGGCCACCAC
6520026	0.00151947	6.41495e-05	1.40514	up	NUCB1	4924	Homo sapiens nucleobindin 1 (NUCB1), mRNA.		GO:0005615|GO:0005737|GO:0005793|GO:0005794|GO:0005856|GO:0016020	GO:0003677|GO:0005509	chr19	54118266	54118315	CTGACACTGCTCCGCATCCTGCTGTGTGTCCTGTTCCATGTTCCGGTTCC
2570091	0.0016757	7.22544e-05	1.38207	down	PHF19	26147	Homo sapiens PHD finger protein 19 (PHF19), transcript variant 1, mRNA.	GO:0006350|GO:0006355	GO:0005634	GO:0003676|GO:0005515|GO:0008270|GO:0003676|GO:0005515|GO:0008270|GO:0046872	chr9	123618110	123618159	GGGGTGTCTGCACCACCTGGGAAGATAGCACAAGGCCTAATGAGGTCACC
3060192	1.49309e-05	1.5769e-07	1.57595	down	GINS3	64785	Homo sapiens GINS complex subunit 3 (Psf3 homolog) (GINS3), mRNA.	GO:0006260	GO:0005634		chr16	56997199	56997248	GGCCCATTAGACTGTTTGCAGGGCATCACTGCTTCCCCCTGACACCTCAC
1340039	0.025104	0.00269551	1.22254	up	TFPI	7035	Homo sapiens tissue factor pathway inhibitor (lipoprotein-associated coagulation inhibitor) (TFPI), transcript variant 1, mRNA.	GO:0007598	GO:0005576|GO:0005576|GO:0005634|GO:0005737|GO:0005886	GO:0004867	chr2	188348856	188348905	CAATGCTGTGAATAACTCCCTGACTCCGCAATCAACCAAGGTTCCCAGCC
1510736	0.0488613	0.00676831	1.2091	up	KLC1	3831	Homo sapiens kinesin light chain 1 (KLC1), transcript variant 1, mRNA.	GO:0008088	GO:0005737|GO:0005829|GO:0005829|GO:0005871|GO:0005871|GO:0005874|GO:0030424|GO:0031410|GO:0035253	GO:0003777|GO:0005515|GO:0005515	chr14	103222158	103222207	GCTCGGACTCCGGGTCTCCCTAGGATATGCCCCAGTAGCATTTGCTGTGT
6280209	0.0234778	0.00245089	1.31937	down	CAMSAP1L1	23271	Homo sapiens calmodulin regulated spectrin-associated protein 1-like 1 (CAMSAP1L1), mRNA.				chr1	199096276	199096325	GGTTTCATGGACACTGTTGAGCAATGTACAGTGTATGGTGTGCTTACCTG
2340671	0.01184	0.000966719	1.41496	up	MAEA	10296	Homo sapiens macrophage erythroblast attacher (MAEA), transcript variant 1, mRNA.	GO:0007049|GO:0007155|GO:0007346|GO:0033033|GO:0043249|GO:0051301	GO:0005624|GO:0005634|GO:0005737|GO:0005819|GO:0005826|GO:0005856|GO:0005886|GO:0005887|GO:0016363	GO:0003779	chr4	1299303	1299352	TTGAGATGTTCCTGACGGCCAAAGAGGTGGAGGAGTCCCTGGAGAGGCGT
4120279	0.00239869	0.000117025	1.32866	up	APBB3	10307	Homo sapiens amyloid beta (A4) precursor protein-binding, family B, member 3 (APBB3), transcript variant 3, mRNA.		GO:0005737|GO:0005856|GO:0005737|GO:0005856	GO:0005515|GO:0005515	chr5	139938025	139938074	GCCTTCTCTGCCTGTCCCTCCGATCCTTGTCCACCGTCTATTTATTGCCC
4780133	0.00384289	0.000218018	1.3768	up	GBA	2629	Homo sapiens glucosidase, beta; acid (includes glucosylceramidase) (GBA), transcript variant 3, mRNA.	GO:0005975|GO:0006629|GO:0006665|GO:0007040|GO:0008152	GO:0005765|GO:0016020	GO:0004348|GO:0005515|GO:0016798|GO:0043169	chr1	155204870	155205013	GGCTCTGCTGTTGTGGTCGTGCTAAACCGCTCCTCTAAGGATGTGCCTCT
4590040	7.22096e-06	6.00535e-08	1.79066	down	CCNB1	891	Homo sapiens cyclin B1 (CCNB1), mRNA.	GO:0000086|GO:0007049|GO:0007067|GO:0031145|GO:0051301|GO:0051437	GO:0005575|GO:0005634|GO:0005654|GO:0005654|GO:0005654|GO:0005654|GO:0005654|GO:0005654|GO:0005737|GO:0005813|GO:0005829|GO:0005829|GO:0005829	GO:0005515|GO:0005515|GO:0005515	chr5	68473790	68473839	ACTTCCATAGGACATACTGCATGTAAGCCAAGTCATGGAGAATCTGCTGC
150692	0.0182286	0.00172359	1.24984	up	SLC26A6	65010	Homo sapiens solute carrier family 26, member 6 (SLC26A6), transcript variant 3, mRNA.	GO:0006810|GO:0007413|GO:0008272|GO:0006810|GO:0008272|GO:0006810|GO:0008272	GO:0016020|GO:0016021|GO:0016020|GO:0016021|GO:0016020|GO:0016021	GO:0005215|GO:0008271|GO:0005215|GO:0008271|GO:0005215|GO:0008271	chr3	48663185	48663234	CAGTCAGGCTGGCAGTGGCGCGGTACAGGGAGGGAACTGGTGCATATTTT
1010470	1.13666e-08	1.20422e-11	2.37832	down	C9orf140	89958	Homo sapiens chromosome 9 open reading frame 140 (C9orf140), mRNA.			GO:0005509	chr9	139076854	139076903	AGCGTCCCTGGGCTCTATCCGCGAGGTGCCAGTAGCGTGTGCAGGTACAT
6510360	0.00246098	0.000120716	1.31579	up	C1orf97	84791	Homo sapiens chromosome 1 open reading frame 97 (C1orf97), mRNA.				chr1	209672321	209672370	CTCAGCGTTTTGGTGTAAGGCGGCCAAAGAAGGATGCGGAGCCCAGCACT
1990379	0.00461864	0.00027703	1.3327	down	SLFN11	91607	Homo sapiens schlafen family member 11 (SLFN11), mRNA.		GO:0005634	GO:0000166|GO:0005524	chr17	30701913	30701962	CTTACTCTACTGATTTCCCCCCAGACTGTGATTTTTGAACTTCCTTGCCT
3440358	0.0230875	0.00238849	1.22596	down	SLFN11	91607	Homo sapiens schlafen family member 11 (SLFN11), mRNA.		GO:0005634	GO:0000166|GO:0005524	chr17	30701867	30701916	GCCTTTCTCCTGTCTTTCTGTGTTTATTCATGGAATCCCAGTTATCTGGG
6900750	0.0250907	0.00269142	1.26547	down	HDAC2	3066	Homo sapiens histone deacetylase 2 (HDAC2), mRNA.	GO:0006350|GO:0006355|GO:0016568|GO:0016575	GO:0000118|GO:0000792|GO:0005634|GO:0005657|GO:0005737	GO:0003700|GO:0004407|GO:0008134|GO:0016787|GO:0019899	chr6	114368898	114369566	AGGAACCAAATCAGAACAGCTCAGCAACCCCTGAATTTGACAGTCTCACC
4610348	1.49309e-05	1.57098e-07	1.57177	down	SGOL1	151648	Homo sapiens shugoshin-like 1 (S. pombe) (SGOL1), transcript variant C2, mRNA.	GO:0007049|GO:0007067|GO:0045132|GO:0051301	GO:0000775|GO:0005634|GO:0030892	GO:0005515	chr3	20212678	20218095	GAAGCTACACCACCTGAAACTCAGCAGTCACCTCATCTTAGCCTGAAGGA
5390064	0.0211554	0.00211464	1.25387	down	ANKS1A	23294	Homo sapiens ankyrin repeat and sterile alpha motif domain containing 1A (ANKS1A), mRNA.		GO:0005737	GO:0005515	chr6	35058264	35058313	GCCCAGGCCAGCAGAAAGCAGCTCAGAAGTATTGTTGCTCATGGTGTGGC
5080367	0.0120791	0.000992579	1.27429	down	CKLF	51192	Homo sapiens chemokine-like factor (CKLF), transcript variant 5, mRNA.	GO:0006935|GO:0008283|GO:0030593|GO:0032940|GO:0048246|GO:0048247	GO:0005576|GO:0005615|GO:0016020|GO:0016021	GO:0008009	chr16	65144146	65144195	ACATCGCCCCTTCTGCTTCAGTGTGAAAGGCCACGTGAAGATGCTGCGGC
2650494	0.0180421	0.00170022	1.24221	down	SMC2	10592	Homo sapiens structural maintenance of chromosomes 2 (SMC2), transcript variant 1, mRNA.	GO:0007049|GO:0007067|GO:0007076|GO:0051276|GO:0051301|GO:0051276	GO:0000228|GO:0000796|GO:0000796|GO:0005634|GO:0005737|GO:0005737|GO:0005694	GO:0000166|GO:0005515|GO:0005524|GO:0046982|GO:0005515|GO:0005524	chr9	105940199	105940248	GCAGCCTTGGATCTTTCTCATACCCAAAACATTGGACAGATGCTGCGTAC
3360400	0.00137241	5.56146e-05	1.40894	down	SMC2	10592	Homo sapiens structural maintenance of chromosomes 2 (SMC2), transcript variant 1, mRNA.	GO:0007049|GO:0007067|GO:0007076|GO:0051276|GO:0051301|GO:0051276	GO:0000228|GO:0000796|GO:0000796|GO:0005634|GO:0005737|GO:0005737|GO:0005694	GO:0000166|GO:0005515|GO:0005524|GO:0046982|GO:0005515|GO:0005524	chr9	105943378	105943427	AGGAAACTTGCTCAGGGTGATAATACAGTTAGGAGTGTCAGGGCCCATGG
6100112	0.0381367	0.00475548	1.31627	up	STXBP1	6812	Homo sapiens syntaxin binding protein 1 (STXBP1), transcript variant 2, mRNA.	GO:0006904|GO:0015031|GO:0016192	GO:0005737|GO:0016020		chr9	129493936	129493985	CGTTGGACTCACACAGACCCTGTACCCTCTCGGCAAGCATCTTCAGTCAG
4280437	0.0350955	0.00424797	1.26706	up	NFS1	9054	Homo sapiens NFS1 nitrogen fixation 1 homolog (S. cerevisiae) (NFS1), nuclear gene encoding mitochondrial protein, mRNA.	GO:0006461|GO:0006534|GO:0008152|GO:0018283|GO:0008152|GO:0008152	GO:0005634|GO:0005737|GO:0005739|GO:0005739|GO:0005759|GO:0005759|GO:0005829|GO:0005739|GO:0005759|GO:0005634	GO:0005515|GO:0016740|GO:0030170|GO:0031071|GO:0042803|GO:0003824|GO:0030170|GO:0003824|GO:0030170	chr20	34284373	34285645	ATGGCTGGGAGAGTGAGGCAGCCATGGAACGTGCTCGTCAGCAAGTAGCA
2940746	8.03272e-05	1.39141e-06	1.53506	up	NNMT	4837	Homo sapiens nicotinamide N-methyltransferase (NNMT), mRNA.		GO:0005737	GO:0008112|GO:0008168|GO:0016740	chr11	113687980	113688029	CAAGGGTCCAGAGAAGGAGGAGAAGTTGAGACAGGCGGTCAAGCAGGTGC
4480341	0.000295836	7.20864e-06	1.46416	down	DHCR24	1718	Homo sapiens 24-dehydrocholesterol reductase (DHCR24), mRNA.	GO:0006695|GO:0006695|GO:0006915|GO:0006916|GO:0006979|GO:0007050|GO:0008104|GO:0009888|GO:0016044|GO:0030539|GO:0031639|GO:0042987|GO:0043154|GO:0043526|GO:0043588|GO:0055114	GO:0000139|GO:0005634|GO:0005783|GO:0005789|GO:0005789|GO:0005794|GO:0016020|GO:0016021	GO:0016491|GO:0019899|GO:0042605|GO:0050614|GO:0050660	chr1	55315467	55315516	CTTGGATATTACTGAAAGGGAGGGGTGGAGATGGGTGTGGCAGTGTATGG
7000356	0.00613586	0.000401409	1.29901	down	RXRA	6256	Homo sapiens retinoid X receptor, alpha (RXRA), mRNA.	GO:0006350|GO:0006355|GO:0006766|GO:0008203|GO:0032526|GO:0044419|GO:0045944|GO:0048384|GO:0055010|GO:0055012|GO:0060038	GO:0005634	GO:0003700|GO:0003706|GO:0003707|GO:0003713|GO:0004886|GO:0005496|GO:0005515|GO:0008270|GO:0043565|GO:0046872	chr9	136472031	136472080	AAGCCTTGCTCTGTTGTGTCCTGTTGCCGGCTCTGGCCTTCCTGTGACTG
7210719	0.00666609	0.000449515	1.2798	up	NCSTN	23385	Homo sapiens nicastrin (NCSTN), mRNA.	GO:0006508|GO:0006509|GO:0007220|GO:0016485|GO:0042987|GO:0043085|GO:0016485|GO:0016485|GO:0016485|GO:0016485|GO:0016485|GO:0016485	GO:0005783|GO:0005794|GO:0005887|GO:0016020|GO:0042470|GO:0005624|GO:0005886|GO:0016021|GO:0016021|GO:0016021|GO:0016021|GO:0016021|GO:0016021	GO:0005515	chr1	158595149	158595198	GCTGAGCCTACTGTCTCCTTCCCACTGTCCTTTCTCCAGGCCCTCAGATG
3140543	0.00550996	0.000349371	1.37275	up	ZMAT3	64393	Homo sapiens zinc finger, matrin type 3 (ZMAT3), transcript variant 2, mRNA.	GO:0001558|GO:0006915|GO:0006974|GO:0015031|GO:0065002	GO:0005622|GO:0005634	GO:0003723|GO:0008270|GO:0046872	chr3	180224833	180224882	GGTCAGCAGAGATTTCAGTTTCCCAGGGCTTAACCAGAACCGCCACCTCA
3850161	0.0306886	0.00355525	1.24105	down	KTELC1	56983	Homo sapiens KTEL (Lys-Tyr-Glu-Leu) containing 1 (KTELC1), mRNA.		GO:0005783|GO:0005788		chr3	120695778	120695827	TGATGGCTTCATGATCCAGCACAGTGCCTCACACAAAGAACTATTGGGTG
3840100	0.00837044	0.000611887	1.2744	up	SEC31A	22872	Homo sapiens SEC31 homolog A (S. cerevisiae) (SEC31A), transcript variant 1, mRNA.	GO:0006888|GO:0006888|GO:0015031|GO:0016044|GO:0016192	GO:0005737|GO:0005737|GO:0005783|GO:0005789|GO:0016020|GO:0030127|GO:0031410|GO:0043231	GO:0003674|GO:0005515|GO:0005515	chr4	83961263	83964758	GCGCTGCCTTTCTTCAGCAACAGACCCTCAAACCAAGAGGAAGCTAGATG
7380270	0.00472493	0.000285328	1.53027	up	MRPS35	60488	Homo sapiens mitochondrial ribosomal protein S35 (MRPS35), nuclear gene encoding mitochondrial protein, mRNA.	GO:0042769|GO:0043043	GO:0005739|GO:0005763|GO:0005763|GO:0005840		chr12	27799819	27799868	ATTTTTACACTGGGGCAATAGACTAGGAGGTCTCTGATTTCTTCTTGGTC
150274	0.00109515	4.14785e-05	1.47471	down	THAP10	56906	Homo sapiens THAP domain containing 10 (THAP10), mRNA.			GO:0003677|GO:0008270|GO:0046872	chr15	71173940	71173989	TGAGAAATAAGCATGGAAATATTAGCTGCCCCGTCTGCCATTCACCAGGA
160746	0.0347358	0.00418603	1.21809	up	APRT	353	Homo sapiens adenine phosphoribosyltransferase (APRT), transcript variant 1, mRNA.	GO:0006166|GO:0006168|GO:0007625|GO:0006166|GO:0006168|GO:0007625|GO:0009116	GO:0005737|GO:0005829	GO:0002055|GO:0003999|GO:0016757|GO:0002055|GO:0003999|GO:0003999|GO:0005515|GO:0016208|GO:0016757	chr16	88876155	88876204	TGAGGTCCTGGAGTGCGTGAGCCTGGTGGAGCTGACCTCGCTTAAGGGCA
6510603	0.0134272	0.00114089	1.26265	up	APRT	353	Homo sapiens adenine phosphoribosyltransferase (APRT), transcript variant 1, mRNA.	GO:0006166|GO:0006168|GO:0007625|GO:0006166|GO:0006168|GO:0007625|GO:0009116	GO:0005737|GO:0005829	GO:0002055|GO:0003999|GO:0016757|GO:0002055|GO:0003999|GO:0003999|GO:0005515|GO:0016208|GO:0016757	chr16	88876524	88876847	TCCCTGGAGTACGGGAAGGCTGAGCTGGAGATTCAGAAAGACGCCCTGGA
3180048	0.000153085	3.21124e-06	1.88575	up	IDH1	3417	Homo sapiens isocitrate dehydrogenase 1 (NADP+), soluble (IDH1), mRNA.	GO:0005975|GO:0006097|GO:0006099|GO:0006102|GO:0006749|GO:0006979|GO:0055114|GO:0006102|GO:0008152	GO:0005737|GO:0005777|GO:0005829	GO:0000287|GO:0004450|GO:0016491|GO:0016616|GO:0030145|GO:0004450|GO:0016616	chr2	209104633	209104682	GATGGCAAGACAGTAGAAGCAGAGGCTGCCCACGGGACTGTAACCCGTCA
6270670	0.0207869	0.00206649	1.25838	up	IDH1	3417	Homo sapiens isocitrate dehydrogenase 1 (NADP+), soluble (IDH1), mRNA.	GO:0005975|GO:0006097|GO:0006099|GO:0006102|GO:0006749|GO:0006979|GO:0055114|GO:0006102|GO:0008152	GO:0005737|GO:0005777|GO:0005829	GO:0000287|GO:0004450|GO:0016491|GO:0016616|GO:0030145|GO:0004450|GO:0016616	chr2	209101362	209101411	CCTGTCCATGACCTTGGGCACAGGGAAGTTCTGGTGTCATAGATATCCCG
3990075	0.0411549	0.00526917	1.20375	down	USP13	8975	Homo sapiens ubiquitin specific peptidase 13 (isopeptidase T-3) (USP13), mRNA.	GO:0006511	GO:0005634|GO:0005730|GO:0005737	GO:0004197|GO:0004221|GO:0005509|GO:0008233|GO:0008270	chr3	179506937	179506986	CACTGCACAAATCCTGCCACTCTTGATGTGCCGCTTGTCTCAGCCTTGGC
6560301	0.00228216	0.000110252	1.37618	down	SH2B3	10019	Homo sapiens SH2B adaptor protein 3 (SH2B3), mRNA.	GO:0007242|GO:0030154|GO:0035162	GO:0005634|GO:0005737	GO:0004871|GO:0005515	chr12	110373463	110373512	AAGGCCTTGGACTCTTCCCTGAGGGTTGCCTGAAATTCCTTCATGCTTTC
1070474	0.0242545	0.00257083	1.22435	down	C5orf37	134359	Homo sapiens chromosome 5 open reading frame 37 (C5orf37), mRNA.			GO:0042802	chr5	75006076	75006125	CCCCGGACCATTCATCCTGAAAGTAGTACCTCAGCTTCCAGATCACTTGG
5960725	0.0495725	0.00689421	1.29511	up	GRB10	2887	Homo sapiens growth factor receptor-bound protein 10 (GRB10), transcript variant 1, mRNA.	GO:0007165|GO:0048009|GO:0007165|GO:0007267|GO:0008286|GO:0048009	GO:0005737|GO:0005886	GO:0004872|GO:0005515|GO:0005070|GO:0005515|GO:0005070|GO:0005070|GO:0005515	chr7	50625870	50625919	GGCCTCGCGCTGGGCGGCTGGGAATTCCACCTGAGAACAAGTCCCGCAAA
2850630	0.000110244	2.12569e-06	1.47737	down	C19orf48	84798	Homo sapiens chromosome 19 open reading frame 48 (C19orf48), mRNA.				chr19	55992778	55992827	GCAGGCCAAGCAGGGCAACCCCACACCCTTGACATAAAAGCATCTTGAAG
4010445	0.0295647	0.00336553	1.22092	up	SFRS2IP	9169	Homo sapiens splicing factor, arginine/serine-rich 2, interacting protein (SFRS2IP), mRNA.	GO:0000245|GO:0006397|GO:0008380	GO:0005634|GO:0005665	GO:0005515|GO:0031202|GO:0005515|GO:0008270|GO:0046872|GO:0005515|GO:0008270|GO:0005515|GO:0008270	chr12	46316835	46316884	CTGCTCCGACAGCAGCCCCAGGAAATACGGGAATGGTTCAGGGACCAAGT
6110253	0.00127975	5.07674e-05	1.34599	up	SUMF2	25870	Homo sapiens sulfatase modifying factor 2 (SUMF2), transcript variant 4, mRNA.		GO:0005783|GO:0005788	GO:0005488|GO:0005509|GO:0005515|GO:0042803|GO:0005488	chr7	56115785	56115834	GGAGAGTAGCCTGCTCCCACACTGTCACTGGATGTCATGGGGCCAATAAA
2680474	0.0130039	0.00109584	1.31601	up	SUMF2	25870	Homo sapiens sulfatase modifying factor 2 (SUMF2), transcript variant 4, mRNA.		GO:0005783|GO:0005788	GO:0005488|GO:0005509|GO:0005515|GO:0042803|GO:0005488	chr7	56115332	56115381	GTTCAGTCCTAAAAGGGTCTGGGAGAACCAGATGATGTACTAGGTGAAGC
2630195	0.000780015	2.57002e-05	1.38782	up	VAMP5	10791	Homo sapiens vesicle-associated membrane protein 5 (myobrevin) (VAMP5), mRNA.	GO:0007275|GO:0007517|GO:0007519|GO:0016192|GO:0030154	GO:0005794|GO:0005886|GO:0005887|GO:0012505		chr2	85673689	85673738	CATCCTGATTGTGCTGCTGGTCGTCTTTCTCCCTCAGAGCAGTGACAGCA
4850711	0.043372	0.0056725	1.21149	down	SNORA57	692158	Homo sapiens small nucleolar RNA, H/ACA box 57 (SNORA57), small nucleolar RNA.				chr11	62432983	62433032	ATGTCTTCGGTGCTGGCGGCTTCCCATCCGCTGGTTCTATCCTCAAACGC
4220767	0.00651782	0.000433992	1.40452	down	SMAD7	4092	Homo sapiens SMAD family member 7 (SMAD7), mRNA.	GO:0006350|GO:0006355|GO:0006950|GO:0007179|GO:0030509	GO:0005622|GO:0005634|GO:0005667|GO:0005737|GO:0005829	GO:0003700|GO:0005515|GO:0030617	chr18	46446794	46446843	CCCATCCTGTGTGTTAAGCTCTGCTATTAGGCCAGCAAGCGGGGATGTCC
540563	0.0285889	0.00322265	1.23393	up	HLA-DMA	3108	Homo sapiens major histocompatibility complex, class II, DM alpha (HLA-DMA), mRNA.	GO:0006461|GO:0015031|GO:0016064|GO:0019882|GO:0019886|GO:0045059|GO:0045582|GO:0050778|GO:0051085|GO:0002504|GO:0006955|GO:0002504|GO:0006955|GO:0006461|GO:0015031|GO:0016064|GO:0019882|GO:0019886|GO:0045059|GO:0045582|GO:0050778|GO:0051085|GO:0002504|GO:0006955|GO:0002504|GO:0006461|GO:0015031|GO:0016064|GO:0019886|GO:0045059|GO:0045582|GO:0050778|GO:0051085|GO:0002504|GO:0006955|GO:0002504|GO:…	GO:0005622|GO:0005765|GO:0005771|GO:0010008|GO:0016020|GO:0042613|GO:0016020|GO:0016021|GO:0042613|GO:0016020|GO:0016021|GO:0042613|GO:0005622|GO:0005765|GO:0005771|GO:0010008|GO:0016020|GO:0042613|GO:0016020|GO:0016021|GO:0042613|GO:0005622|GO:0005765|GO:0005771|GO:0010008|GO:0016020|GO:0016021|GO:0042613|GO:0016020|GO:0016021|GO:0042613|GO:0005575|GO:0016020|GO:0016021|GO:0042613|GO:0005622|GO:…	GO:0005515|GO:0005515|GO:0005515|GO:0032395|GO:0005515	chr6	33024380	33024429	CCAGAGTGGCCTGCCTATCACAACCACATCCCTTCCCCCCACAAGGCAAT
1510091	0.0145118	0.00125992	1.33418	up	VPS36	51028	Homo sapiens vacuolar protein sorting 36 homolog (S. cerevisiae) (VPS36), mRNA.	GO:0006350|GO:0006355|GO:0015031	GO:0005634|GO:0005737|GO:0005764|GO:0005770	GO:0008289|GO:0043130	chr13	52986870	52986919	CTGGTTTGTTCATGGATGTATTCTAAGAGCTGAGAACAGGGCCTGGACAC
3930615	6.8634e-05	1.15614e-06	1.77662	up	NCKAP1	10787	Homo sapiens NCK-associated protein 1 (NCKAP1), transcript variant 2, mRNA.	GO:0006915|GO:0007417	GO:0005886|GO:0016021|GO:0042995	GO:0005515|GO:0005515|GO:0005515	chr2	183822303	183826914	GCACAGAACAGTGTACCCTTAGTGACCAGTTGCTACCCAAGCATTGTGCC
3420647	0.0401733	0.00508816	1.21934	up	FBXO8	26269	Homo sapiens F-box protein 8 (FBXO8), mRNA.	GO:0006511|GO:0032012|GO:0032012	GO:0000151|GO:0005622|GO:0005634|GO:0005730|GO:0005737|GO:0005622	GO:0005086|GO:0005086	chr4	175395036	175395085	GGACTTAGCAGATATGGGGGTTACATCAGTGCTGGTCATTGTAGCCTGAG
6130193	0.000228078	5.15887e-06	1.45235	down	TMEM109	79073	Homo sapiens transmembrane protein 109 (TMEM109), mRNA.		GO:0005634|GO:0005640|GO:0016020|GO:0016021|GO:0033017		chr11	60447102	60447151	CTTCTCTCCCCATCGCTCCACAACCTGAAACCGAGAAGGAGTTGCTGACC
1510072	0.0299386	0.00342712	1.22135	down	PITRM1	10531	Homo sapiens pitrilysin metallopeptidase 1 (PITRM1), mRNA.	GO:0006508|GO:0006508|GO:0006508|GO:0006508	GO:0005634|GO:0005739|GO:0005759	GO:0003824|GO:0004222|GO:0008270|GO:0046872|GO:0008237|GO:0008270|GO:0004222|GO:0008270|GO:0004222|GO:0008047|GO:0008233|GO:0008270|GO:0046872	chr10	3190421	3190470	TCCTCGGACCCGAGAACCCGAAAATTGCCAAGGACCCATCCTGGATCATC
580719	2.19675e-05	2.58332e-07	1.69168	down	C13orf34	79866	Homo sapiens chromosome 13 open reading frame 34 (C13orf34), mRNA.				chr13	72227391	72227440	GTTCCTCGCATATATCGTTGTGCACAGGATCAACATGATGGTGACTGGGA
2630561	0.00763223	0.00054256	1.39839	up	RPL6	6128	Homo sapiens ribosomal protein L6 (RPL6), transcript variant 1, mRNA.	GO:0006412|GO:0006355|GO:0006414	GO:0005622|GO:0005840|GO:0005622|GO:0005829|GO:0005840|GO:0022625	GO:0003735|GO:0003677|GO:0003723|GO:0003735	chr12	112847219	112847268	GGCCTTCCAGACGCTTCATTTTTGTTGTTTGGGTTTGCGGCAGGGCACAA
2100341	0.0475393	0.00651267	1.20332	down	C14orf2	9556	Homo sapiens chromosome 14 open reading frame 2 (C14orf2), mRNA.				chr14	103448545	103448594	GTACTGCTTTCAGTGTGTTCCCCCTCAGCCCCTCCGGCGTGTCAGGCATA
520332	0.00393257	0.000225397	1.33714	up	B4GALT7	11285	Homo sapiens xylosylprotein beta 1,4-galactosyltransferase, polypeptide 7 (galactosyltransferase I) (B4GALT7), mRNA.	GO:0005975|GO:0006024|GO:0006029|GO:0006464|GO:0043206|GO:0048147	GO:0005794|GO:0016020|GO:0016021	GO:0008378|GO:0008378|GO:0016757|GO:0030145|GO:0046525|GO:0046872	chr5	176969704	176969753	AGCTGGCGTAGGTGGCAGTTGGGCCTGGTGAGGGTTAGGACTTCAGAAAC
4280561	0.00474353	0.000286703	1.31169	up	ACTR1A	10121	Homo sapiens ARP1 actin-related protein 1 homolog A, centractin alpha (yeast) (ACTR1A), mRNA.	GO:0016192	GO:0005737|GO:0005813|GO:0005856|GO:0005869	GO:0000166|GO:0005198|GO:0005515|GO:0005524	chr10	104229006	104229055	GCACAGCCTCGCACAAACCACATTGCCTGGTGGGGCCCAGTGTACTGAAA
3390292	0.0101832	0.000797765	1.29886	up	KLF9	687	Homo sapiens Kruppel-like factor 9 (KLF9), mRNA.	GO:0006357|GO:0007566|GO:0050847	GO:0005622|GO:0005634	GO:0003700|GO:0003700|GO:0008270|GO:0046872	chr9	72999837	72999886	GCCCTTCACCATTGTGGAATGATGCCCTGGCTTTAAGGTTTAGCTCCACA
110682	0.0484127	0.00666842	1.19443	up	S100A11	6282	Homo sapiens S100 calcium binding protein A11 (S100A11), mRNA.	GO:0007165|GO:0008156|GO:0008285	GO:0001726|GO:0005634|GO:0005737|GO:0005737	GO:0005509|GO:0042803|GO:0048154|GO:0048306	chr1	152005037	152005086	CTGTCATCATCTCCACAGCCCACCCATCCCCTGAGCACACTAACCACCTC
7570195	0.0105785	0.000842782	1.26411	up	KIAA0355	9710	Homo sapiens KIAA0355 (KIAA0355), mRNA.				chr19	34846168	34846217	GACTGTGTGAAGCCGTTTGTGTGGTCTCCATGTAGGTGCTGTGTTCCCGG
1450477	0.0102476	0.000804477	1.26823	down	SIVA1	10572	Homo sapiens SIVA1, apoptosis-inducing factor (SIVA1), transcript variant 2, mRNA.	GO:0006917|GO:0006917|GO:0006917|GO:0006917|GO:0006924|GO:0008635|GO:0019987|GO:0032088|GO:0044419	GO:0005634|GO:0005654|GO:0005737|GO:0005737|GO:0005737|GO:0005739	GO:0001618|GO:0005175|GO:0005175|GO:0005515|GO:0005515|GO:0005515|GO:0005515|GO:0005515|GO:0005515|GO:0005515|GO:0008270|GO:0008270|GO:0008656|GO:0046872	chr14	104293990	104294039	ATCTGGGGTAGCGTCCATTGCCTGTTCCTCATGCGTGCGAGCCGTGGATG
2970754	0.0204959	0.0020281	1.24779	down	HAUS8	93323	Homo sapiens HAUS augmin-like complex, subunit 8 (HAUS8), transcript variant 1, mRNA.				chr19	17160909	17160958	CGCAGAGGCAAGCAAAGAGGCAGCCTTGGCAAACCAGGAAGTCTGGGAAG
650307	0.0220385	0.00222276	1.24246	down	HAUS8	93323	Homo sapiens HAUS augmin-like complex, subunit 8 (HAUS8), transcript variant 1, mRNA.				chr19	17160848	17160897	ATGGCGCCCCCCAGCCGGTGGTATTTCAATCAAGACAGTGCCTGCAGAGA
6280674	0.00934493	0.000707874	1.2784	down	HAUS8	93323	Homo sapiens HAUS augmin-like complex, subunit 8 (HAUS8), transcript variant 1, mRNA.				chr19	17160745	17160794	CCTCGTCAGCCCCCGCTCAGGCCACGTTCATCAGCCCAAGCGAAGATTTT
2600288	0.0207822	0.00206413	1.24496	up	GOSR2	9570	Homo sapiens golgi SNAP receptor complex member 2 (GOSR2), transcript variant A, mRNA.	GO:0006886|GO:0006886|GO:0006888|GO:0006944|GO:0016192	GO:0016020|GO:0000139|GO:0005789|GO:0005794|GO:0016020|GO:0016021	GO:0004872|GO:0005215	chr17	42367443	42367492	CCCTCCAGAAAGTTCACAACGGCATGGATGACCTCATTTTAGATGGGCAC
4640059	0.023191	0.00240166	1.23741	down	HOXC8	3224	Homo sapiens homeobox C8 (HOXC8), mRNA.	GO:0006355|GO:0007275|GO:0030182	GO:0005634	GO:0003700|GO:0005515|GO:0043565	chr12	52692510	52692559	CACTAAGAAAACCCAACAACTGAGACTGCCTAGCCCGCCGGTCCTGTGCG
5560360	0.0487053	0.00673897	1.21837	up	RIPK5	25778	Homo sapiens receptor interacting protein kinase 5 (RIPK5), transcript variant 2, mRNA.	GO:0006468	GO:0005737	GO:0000166|GO:0004674|GO:0005515|GO:0005524|GO:0016740	chr1	203378372	203378421	ACAGCAGGACCGTCTTAATTGTGTGCATTTTGAAGAGATGCGACTCTGGG
5720609	0.00853691	0.000629568	1.27723	up	DYNC2LI1	51626	Homo sapiens dynein, cytoplasmic 2, light intermediate chain 1 (DYNC2LI1), transcript variant 1, mRNA.	GO:0007275|GO:0030030	GO:0005737|GO:0005874|GO:0005929|GO:0030286	GO:0003774	chr2	43870342	43875126	CCCATCACAGGTGACACCTTACGGACGTTTTCTCTTGTTCTCGTTCTGGA
2650020	0.000307928	7.66639e-06	1.44789	down	PWWP2B	170394	Homo sapiens PWWP domain containing 2B (PWWP2B), transcript variant 1, mRNA.				chr10	134081005	134081054	CTCAGCTTGGTCTCCCGCAGGCTTCAGAAAAACCCAATTGCACGTGTGGG
4640639	0.0187269	0.0017965	1.26551	up	KHNYN	23351	Homo sapiens KH and NYN domain containing (KHNYN), mRNA.				chr14	23979989	23980038	ATCATTTGCCCTGGGTGTCCTTGGTCCTGCCTGGCTCTCTGTAGTGGAGG
2940646	1.83825e-05	2.0741e-07	1.57193	down	REPIN1	29803	Homo sapiens replication initiator 1 (REPIN1), transcript variant 2, mRNA.	GO:0006260	GO:0005622|GO:0005634|GO:0005664	GO:0003677|GO:0008270|GO:0046872	chr7	149701858	149701907	GGTGACAGGAACTTCCGCACCTCCTGAGGCCCTGGATGATTCTAATTGTT
6060278	0.00111933	4.25722e-05	1.49548	up	HMBS	3145	Homo sapiens hydroxymethylbilane synthase (HMBS), transcript variant 1, mRNA.	GO:0006783	GO:0005737|GO:0005739	GO:0004418|GO:0016740	chr11	118460936	118460985	TACTTTCCAAGCGGAGCCATGTCTGGTAACGGCAATGCGGCTGCAACGGC
6900086	0.00215555	0.000102819	1.40736	down	ADAMTS1	9510	Homo sapiens ADAM metallopeptidase with thrombospondin type 1 motif, 1 (ADAMTS1), mRNA.	GO:0006508|GO:0007229|GO:0008285	GO:0005576|GO:0005578	GO:0004222|GO:0004497|GO:0005506|GO:0008201|GO:0008233|GO:0008270|GO:0009055|GO:0020037|GO:0046872	chr21	28208968	28209017	GCCGGAACAAAAATGAGGTGTGTAGAACAGGGTCCCACAGGTTTGGGGAC
4590554	0.043109	0.00562266	1.20638	up	KCTD3	51133	Homo sapiens potassium channel tetramerisation domain containing 3 (KCTD3), mRNA.	GO:0006813	GO:0008076|GO:0016020	GO:0005249|GO:0005515|GO:0005216	chr1	213860882	213860931	GTGCCCATATAGGTGAGCATCCCTTTAGATCATGGGAACCAGCAGACTGC
2630333	0.00547371	0.000345333	1.29223	up	CYB5D2	124936	Homo sapiens cytochrome b5 domain containing 2 (CYB5D2), mRNA.		GO:0016020|GO:0016021	GO:0020037|GO:0046914	chr17	4007353	4007402	TCCCTTTGACCTACTGGCCATCTTCCTCACAGCCCTCAGATATCAACGGG
1500500	5.93508e-05	9.40029e-07	1.71816	down	WNT7B	7477	Homo sapiens wingless-type MMTV integration site family, member 7B (WNT7B), mRNA.	GO:0007223|GO:0007267|GO:0007275|GO:0009887|GO:0045669|GO:0050808	GO:0005576|GO:0005578	GO:0004871|GO:0005201	chr22	44696820	44696869	CACATAGCCAGTCCTAACTCCGTACTCTGTGTCAGCCCATCCCCTAGACA
940435	2.22186e-05	2.63638e-07	1.52519	up	TRIM8	81603	Homo sapiens tripartite motif-containing 8 (TRIM8), mRNA.	GO:0008150	GO:0005575|GO:0005634	GO:0005515|GO:0008270|GO:0046872	chr10	104407199	104407248	GAGGGGCTGCCCGGAGTTGGGTCCTTGCCTGGATTTTGACACAGCAACTT
7050220	0.000835013	2.84855e-05	1.40126	down	NMU	10874	Homo sapiens neuromedin U (NMU), mRNA.	GO:0006940|GO:0006940|GO:0007165|GO:0007218|GO:0007586	GO:0005576	GO:0005102	chr4	56166204	56166253	GCTGCAGCTCGTTCCTCACCTGCATGAGAGAAGAATGAAGAGATTCAGAG
840280	0.0300824	0.00345155	1.30952	down	BIRC2	329	Homo sapiens baculoviral IAP repeat-containing 2 (BIRC2), mRNA.	GO:0001890|GO:0007166|GO:0042981|GO:0043123	GO:0005622|GO:0005737|GO:0005829	GO:0005515|GO:0005515|GO:0005515|GO:0005515|GO:0008270|GO:0046872	chr11	101754474	101754523	CCAGGAACTCTGGAGTTCATCAGAGTTATGGTGCCGAATTGTCTTTGGTG
780367	0.00977319	0.000751704	1.29681	down	ATP2C1	27032	Homo sapiens ATPase, Ca++ transporting, type 2C, member 1 (ATP2C1), transcript variant 1, mRNA.	GO:0006812|GO:0006816|GO:0006816|GO:0006828|GO:0006874|GO:0008152|GO:0008544|GO:0016339|GO:0030026|GO:0031532|GO:0032468|GO:0032472|GO:0043123	GO:0000139|GO:0005794|GO:0005794|GO:0005802|GO:0016020|GO:0016021	GO:0000166|GO:0000287|GO:0004871|GO:0005388|GO:0005388|GO:0005388|GO:0005388|GO:0005388|GO:0005509|GO:0005509|GO:0005509|GO:0005509|GO:0005524|GO:0005524|GO:0005524|GO:0015410|GO:0016787|GO:0016820|GO:0030145	chr3	130721654	130721703	TCTTTGAGTCATTGTTACTGAGGCAGTTGAGTGTAAGGAGCTGGCTGCAG
7320669	0.000808426	2.70331e-05	1.36683	up	PAMR1	25891	Homo sapiens peptidase domain containing associated with muscle regeneration 1 (PAMR1), transcript variant 1, mRNA.				chr11	35453874	35453923	CCAGGGCAGCAGAGCTGGGATGTGGTGCATGCCTTTGTGTACATGGCCAC
2470114	0.0333519	0.00395919	1.28649	down	COL6A3	1293	Homo sapiens collagen, type VI, alpha 3 (COL6A3), transcript variant 1, mRNA.	GO:0007155|GO:0007517	GO:0005615|GO:0005576|GO:0005578|GO:0005589	GO:0004867|GO:0005198|GO:0005515	chr2	237897833	237897882	CCTATCAATCCAAATTCCCTCTGGAGTTTCATGTTATGCCTGTTGCAGGC
4560164	0.00144379	5.94252e-05	1.34635	up	PDLIM7	9260	Homo sapiens PDZ and LIM domain 7 (enigma) (PDLIM7), transcript variant 4, mRNA.	GO:0001503|GO:0006898|GO:0007275|GO:0030036|GO:0030154	GO:0001725|GO:0001726|GO:0005737|GO:0005856	GO:0005515|GO:0005515|GO:0008270|GO:0046872	chr5	176917287	176917336	CATCTGACACTGCCTTCCCTCTTTGCCCTGTGGTACTGCTGTCTGCCAGG
150543	1.75178e-06	1.03002e-08	1.99765	down	FAM83D	81610	Homo sapiens family with sequence similarity 83, member D (FAM83D), mRNA.				chr20	37014583	37014632	CCGTGTTCAGACTCCTGGTTTCTTCCAGGCTTACAGTGGACATCATCAGC
1580427	5.51799e-08	1.05227e-10	2.58743	down	THEM2	55856	Homo sapiens thioesterase superfamily member 2 (THEM2), mRNA.		GO:0005739	GO:0016787	chr6	24806143	24806192	AGAAGAGCATACCAATGCAATAGGCACTCTCCACGGCGGTTTGACAGCCA
1440273	0.00102533	3.79652e-05	1.41411	down	C21orf45	54069	Homo sapiens chromosome 21 open reading frame 45 (C21orf45), mRNA.				chr21	33640624	33640673	GGAATACTTACCAAAGAGGAGTAACCATCTCTGAGGGTGGGATTCTGGGG
1990053	0.0167262	0.00153104	1.25385	down	POLRMT	5442	Homo sapiens polymerase (RNA) mitochondrial (DNA directed) (POLRMT), nuclear gene encoding mitochondrial protein, mRNA.	GO:0006350|GO:0006390	GO:0005739	GO:0003677|GO:0003899|GO:0005515|GO:0016740|GO:0016779	chr19	617793	617842	CCTGACCTTCGTCTCTGTGCACGACTGTTACTGGACTCACGCAGCTGATG
3360241	0.0163755	0.00148679	1.30472	down	TNPO3	23534	Homo sapiens transportin 3 (TNPO3), mRNA.	GO:0015031	GO:0005634|GO:0005737	GO:0004872|GO:0005515	chr7	128595345	128595394	ACTGTGTCCCACAATCAGAAACCTCCGTTGTGGCAGAGGGGCCTTCACCG
240242	0.0234778	0.00244835	1.25439	down	TUBGCP4	27229	Homo sapiens tubulin, gamma complex associated protein 4 (TUBGCP4), mRNA.	GO:0006461|GO:0007020	GO:0000922|GO:0005813|GO:0005874|GO:0008274	GO:0005200	chr15	41484988	41485037	GCACCTACTACGTACCTTGGTACTGTTCAAGCTGTGGGAGATACAGCGGT
3830164	0.0167216	0.00152973	1.26088	down	C14orf145	145508	Homo sapiens chromosome 14 open reading frame 145 (C14orf145), mRNA.		GO:0005634|GO:0005730|GO:0005737		chr14	80032680	80032729	AGTGTCTAAGAACGTATTCCCTTTACACGCTGATCTCCTAGTGGAGAAGG
3060110	0.042309	0.00546848	1.20107	down	SFRS6	6431	Homo sapiens splicing factor, arginine/serine-rich 6 (SFRS6), mRNA.	GO:0000398|GO:0006376|GO:0008380	GO:0005634	GO:0000166|GO:0003723|GO:0005515	chr20	41525549	41525598	GCCTACTTTGACTTTTACGTTCCCATTCCTGTGTTACCACCTTCCTCCCG
5720184	0.00610184	0.000396597	1.44517	up	KLF10	7071	Homo sapiens Kruppel-like factor 10 (KLF10), transcript variant 1, mRNA.	GO:0000122|GO:0001501|GO:0006355|GO:0007179|GO:0007267|GO:0008285|GO:0030282|GO:0045672	GO:0005622|GO:0005634	GO:0003700|GO:0003700|GO:0005515|GO:0008270|GO:0046872	chr8	103736971	103737020	GGCCAAGCAGCCAACCATGCTCAACTTCGGTGCCTCTCTCCAGCAGACTG
6200133	0.00147245	6.1269e-05	1.40497	up	PECI	10455	Homo sapiens peroxisomal D3,D2-enoyl-CoA isomerase (PECI), transcript variant 1, mRNA.	GO:0006631|GO:0008152|GO:0008152	GO:0005777|GO:0005782	GO:0000062|GO:0004165|GO:0005488|GO:0016853|GO:0016853	chr6	4126392	4126441	GATCTGACTAACTTCACTGATATTCCCCCTGGTGGAGTAGAGGAGAAAGC
4890382	0.00353698	0.000195416	1.34293	down	ILVBL	10994	Homo sapiens ilvB (bacterial acetolactate synthase)-like (ILVBL), mRNA.	GO:0008150	GO:0005575|GO:0016020|GO:0016021	GO:0000287|GO:0016740|GO:0030976	chr19	15226152	15226201	TGCTGCTCTCACGGGAGAACGAGGATCAGGTGGTCAAGGTGCTGCACGAT
5340161	0.0332021	0.00393445	1.22857	up	TMEM217	221468	Homo sapiens transmembrane protein 217 (TMEM217), mRNA.		GO:0016020|GO:0016021		chr6	37288063	37288112	CCTCCCTACCCTGCCTGTCTTCTGTTGATGCTGCTTGGTTTGTCAGGGCT
670072	0.00734629	0.00051088	1.3013	down	EWSR1	2130	Homo sapiens Ewing sarcoma breakpoint region 1 (EWSR1), transcript variant EWS, mRNA.	GO:0006350|GO:0006355	GO:0005634|GO:0005622|GO:0005622|GO:0005622|GO:0005622|GO:0005634|GO:0005737|GO:0009986	GO:0000166|GO:0003676|GO:0008270|GO:0000166|GO:0003676|GO:0008270|GO:0000166|GO:0003676|GO:0008270|GO:0000166|GO:0003723|GO:0005516|GO:0008270|GO:0046872	chr22	28025825	28026144	CCTGGAAAAATGGATAAAGGCGAGCACCGTCAGGAGCGCAGAGATCGGCC
3940133	1.52295e-07	4.92108e-10	1.81904	up	FAM46A	55603	Homo sapiens family with sequence similarity 46, member A (FAM46A), mRNA.				chr6	82516137	82516186	CAGCCAGTATTCACGTGCCAGCAACAGACCTACTCCACTTGGCTACCCTG
7200333	0.00113182	4.31785e-05	1.41261	down	RALY	22913	Homo sapiens RNA binding protein, autoantigenic (hnRNP-associated with lethal yellow homolog (mouse)) (RALY), transcript variant 2, mRNA.	GO:0006397|GO:0008380	GO:0005634|GO:0005681|GO:0030530	GO:0000166|GO:0003723|GO:0000166|GO:0003676|GO:0000166|GO:0003676|GO:0000166|GO:0003676|GO:0000166|GO:0003676	chr20	32131507	32131556	AACGCATCCCAGCCAGTGCCATGTCCTCTGCAGGTGGAGTTACTGGCCTA
7550685	1.51644e-05	1.62264e-07	2.60737	up	MAP1B	4131	Homo sapiens microtubule-associated protein 1B (MAP1B), mRNA.	GO:0001578|GO:0016358	GO:0005829|GO:0005874|GO:0005875	GO:0005198|GO:0005515	chr5	71403424	71403473	GTCCACCTCGCCTAGCCTGTCGCACCGCTTCCTTGACAGCAAGTTCTACT
5290541	0.00803945	0.000577897	1.34099	up	FBXO9	26268	Homo sapiens F-box protein 9 (FBXO9), transcript variant 2, mRNA.	GO:0006511|GO:0016567|GO:0016567	GO:0000151|GO:0000151	GO:0004842|GO:0004842	chr6	52930463	52930512	CTCTGCTAAGCTCCGCTGCAGAGACAGGCAGGAGTAGACACCCGGACACC
6860369	0.00909952	0.000684465	1.27909	up	GPR1	2825	Homo sapiens G protein-coupled receptor 1 (GPR1), transcript variant 2, mRNA.	GO:0007165|GO:0007186	GO:0005737|GO:0005886|GO:0005887	GO:0004872	chr2	207040708	207040757	GTGTGGATATGAAACTTAGGAAGGATCCTCTTGACTCCTTGTGATGTGGC
4250291	0.0147654	0.0012882	1.29355	down	CHPF	79586	Homo sapiens chondroitin polymerizing factor (CHPF), mRNA.		GO:0005794|GO:0016020|GO:0016021	GO:0005515|GO:0016740|GO:0046872|GO:0047238|GO:0050510	chr2	220112075	220112124	CCCCCTGACGCTGCTGATTCGGGCTGTGGCCTCCACGTATTTATGCAGTA
6770408	2.54134e-06	1.66928e-08	1.68937	down	MCM2	4171	Homo sapiens minichromosome maintenance complex component 2 (MCM2), mRNA.	GO:0006260|GO:0006260|GO:0006268|GO:0006270|GO:0006334|GO:0006350|GO:0006355|GO:0007049	GO:0000785|GO:0005634|GO:0005654|GO:0005654|GO:0005654|GO:0005654|GO:0005654|GO:0005654|GO:0005654|GO:0005664	GO:0000166|GO:0003677|GO:0003688|GO:0005515|GO:0005524|GO:0008270|GO:0046872	chr3	127340962	127341011	GAGCTGCTGCCCTCTTGGCGTGAGTTGCGTATTCAGGCTGCTTTTGCTGC
2570139	0.0416515	0.0053444	1.26512	down	TARDBP	23435	Homo sapiens TAR DNA binding protein (TARDBP), mRNA.	GO:0006350|GO:0006355|GO:0006366|GO:0006397|GO:0007067|GO:0008380	GO:0005634	GO:0000166|GO:0003676|GO:0000166|GO:0003700|GO:0003700|GO:0003723|GO:0005515|GO:0008017	chr1	11007805	11007854	TCGGGGACCTCCAAAGACTAAACTGACAAGCCTTCAAGGAGCCCAGGGGT
1660280	0.0044515	0.000263963	1.49959	up	MAPKAP1	79109	Homo sapiens mitogen-activated protein kinase associated protein 1 (MAPKAP1), transcript variant 1, mRNA.	GO:0008150	GO:0005575|GO:0005634|GO:0005829|GO:0005886|GO:0031410	GO:0017016|GO:0016301|GO:0016301|GO:0016301	chr9	128322032	128322081	TGTCAGTGCCTACTGCCTGCATATTGCTGAGGATGATGGGGAGGTGGACA
270619	0.0251536	0.00270483	1.30407	down	GTF3A	2971	Homo sapiens general transcription factor IIIA (GTF3A), mRNA.	GO:0006350|GO:0006355|GO:0006383|GO:0009303	GO:0005622|GO:0005634	GO:0003677|GO:0003709|GO:0003723|GO:0008270|GO:0046872	chr13	26907667	26907716	CGGAGAGTCACCCAACTGTGTGGAAGACAAGATGCTCTCGACAGTTGCAG
1070692	0.000539135	1.62786e-05	1.41059	down	DDX51	317781	Homo sapiens DEAD (Asp-Glu-Ala-Asp) box polypeptide 51 (DDX51), mRNA.	GO:0006364	GO:0005634	GO:0000166|GO:0003723|GO:0005524|GO:0008026|GO:0016787|GO:0000166|GO:0003676|GO:0005524|GO:0008026|GO:0016787	chr12	132623522	132623571	AGCCTTAGTAAAACGGTGAAAAGTACTCCCAGACGGACGCGGGCACCCGT
5130563	0.00652528	0.000435526	1.56096	up	GFPT2	9945	Homo sapiens glutamine-fructose-6-phosphate transaminase 2 (GFPT2), mRNA.	GO:0006002|GO:0006112|GO:0006541|GO:0008152|GO:0016051	GO:0005737	GO:0004360|GO:0005529|GO:0016740	chr5	179660707	179660756	ACTGTTCATCCTAGCTACCCATGCTCTGTGTCCAGGCTTGCTCCTGGCAG
7210020	0.000484308	1.40587e-05	1.57468	up	MAPKAP1	79109	Homo sapiens mitogen-activated protein kinase associated protein 1 (MAPKAP1), transcript variant 6, mRNA.	GO:0008150	GO:0005575|GO:0005634|GO:0005829|GO:0005886|GO:0031410	GO:0017016|GO:0016301|GO:0016301|GO:0016301	chr9	128321924	128321973	GGCCCTGGTTGAAAAGTACTCATCTCCTGGTCTGACATCCAAAGAGTCAC
5550524	0.0270466	0.00297293	1.27124	down	ZDHHC13	54503	Homo sapiens zinc finger, DHHC-type containing 13 (ZDHHC13), transcript variant 2, mRNA.	GO:0043123	GO:0016020|GO:0016021	GO:0004871|GO:0008270|GO:0008415|GO:0016740|GO:0046872	chr11	19150914	19153964	CACCCAGCCAGGGAGAAGGTTCTTCGCTCAGTATGAAGAAAAGCAACCCA
6110564	0.000608941	1.89992e-05	1.4638	down	MYBL1	4603	Homo sapiens v-myb myeloblastosis viral oncogene homolog (avian)-like 1 (MYBL1), mRNA.	GO:0045449|GO:0006355	GO:0005634|GO:0005730|GO:0005634|GO:0005730	GO:0003677|GO:0030528|GO:0003677|GO:0016563	chr8	67637123	67637172	ATGCCAGACATAACATGTAGCAGCCATACTTGCATGGAAACTGACTACAC
5570523	0.0370581	0.0045733	1.2076	down	C1orf159	54991	Homo sapiens chromosome 1 open reading frame 159 (C1orf159), mRNA.		GO:0016020|GO:0016021		chr1	1007507	1007556	GCAGCCACCCATTTCCGGAGCTGCAGGATAGAGCTTCCTCTTGATCTCTG
3800487	0.00971591	0.000746269	1.32504	up	ZNFX1	57169	Homo sapiens zinc finger, NFX1-type containing 1 (ZNFX1), mRNA.	GO:0006355|GO:0006412|GO:0006434	GO:0005634|GO:0005737	GO:0000166|GO:0003700|GO:0004828|GO:0005524|GO:0008270|GO:0046872	chr20	47862736	47862785	GTTTGGTGGCACTGCTGGTTACCCCTGGGCCCTGAATGGAGCTAAAATCA
4250538	0.00771514	0.000550055	1.33961	up	STAT3	6774	Homo sapiens signal transducer and activator of transcription 3 (acute-phase response factor) (STAT3), transcript variant 3, mRNA.	GO:0000122|GO:0006928|GO:0007165|GO:0007165|GO:0007259|GO:0007399|GO:0019221|GO:0044419	GO:0005634|GO:0005730|GO:0005737	GO:0003700|GO:0003700|GO:0004871|GO:0005062|GO:0005509|GO:0008134	chr17	40465854	40465903	ACAGGGTTCGCCCCAGTCCTCCTGCCTGGAGACAGTTGATGTGTCATGCA
5090619	0.00940552	0.000714457	1.3051	up	STAT3	6774	Homo sapiens signal transducer and activator of transcription 3 (acute-phase response factor) (STAT3), transcript variant 3, mRNA.	GO:0000122|GO:0006928|GO:0007165|GO:0007165|GO:0007259|GO:0007399|GO:0019221|GO:0044419	GO:0005634|GO:0005730|GO:0005737	GO:0003700|GO:0003700|GO:0004871|GO:0005062|GO:0005509|GO:0008134	chr17	40465690	40465739	GGGCGAGGGTTCAGGGCTTCTCTGGAGCAGATATTGTCAAGTTCATGGCC
6250064	0.000267384	6.40203e-06	1.4952	up	IRF1	3659	Homo sapiens interferon regulatory factor 1 (IRF1), mRNA.	GO:0045084|GO:0045944|GO:0006350|GO:0045084|GO:0045786|GO:0045944	GO:0005634|GO:0005634	GO:0003700|GO:0043565|GO:0003700|GO:0043565	chr5	131846773	131846822	CCTCAACAGGCCCAGGGAGGGAAGTGTGAGCGCCTTGGTATGACTTAAAA
4610731	8.27661e-07	3.81431e-09	1.72112	down	CHAF1B	8208	Homo sapiens chromatin assembly factor 1, subunit B (p60) (CHAF1B), mRNA.	GO:0006260|GO:0006281|GO:0006335|GO:0006350|GO:0006355|GO:0006461|GO:0007049	GO:0005634|GO:0005654|GO:0005678|GO:0005737|GO:0005737	GO:0003682|GO:0042393|GO:0051082	chr21	36710816	36710865	CAGTGAGTCCTCCCTGGCATCCTCGTGAAAGTGCACACACTTCATGGAGG
5080605	0.00170932	7.54246e-05	1.38899	down	SNRPA1	6627	Homo sapiens small nuclear ribonucleoprotein polypeptide A' (SNRPA1), mRNA.	GO:0000398|GO:0000398|GO:0008380	GO:0030529|GO:0005634|GO:0005681|GO:0005686	GO:0003676|GO:0005515|GO:0003723|GO:0005515	chr15	101821888	101821937	CGGGTCCTGAGCAGTGAGGCAGATGTATAATAATAGGCCCTCTTGGAACA
4850138	0.00699223	0.000478174	1.30727	down	POTEF	728378	Homo sapiens POTE ankyrin domain family, member F (POTEF), mRNA.				chr2	130547903	130547952	GTCCTCTCCCTAGTTCACACAGGGGAGGTGATAGCATTGCTTTTGTGCAA
5130674	0.0244701	0.00260411	1.23254	down	CSE1L	1434	Homo sapiens CSE1 chromosome segregation 1-like (yeast) (CSE1L), mRNA.	GO:0000059|GO:0006886|GO:0006915|GO:0008283	GO:0005634|GO:0005643|GO:0005737	GO:0005515|GO:0008262	chr20	47144848	47144897	AACCCCAAAATTCACCTGGCACAGTCACTTCACAAGTTGTCTACCGCCTG
7000634	0.00537198	0.000336923	1.31145	down	CSE1L	1434	Homo sapiens CSE1 chromosome segregation 1-like (yeast) (CSE1L), mRNA.	GO:0000059|GO:0006886|GO:0006915|GO:0008283	GO:0005634|GO:0005643|GO:0005737	GO:0005515|GO:0008262	chr20	47144907	47146341	GGTTCCATCAATGGTGAGCACCAGCCTGAATGCAGAAGCGCTCCAGTATC
4120538	4.63008e-07	1.79042e-09	2.11133	down	LOC731314	731314	PREDICTED: Homo sapiens similar to H2A histone family, member X (LOC731314), mRNA.							TGGCTTCACGGCTGGCTATGTGGACAGCAAGAGTCGTTTTCGCGGAAGCC
7400497	0.0025763	0.000128467	1.38679	down	IGFBP1	3484	Homo sapiens insulin-like growth factor binding protein 1 (IGFBP1), mRNA.	GO:0001558|GO:0007165	GO:0005576|GO:0005615	GO:0005520	chr7	45899130	45899179	ACCCTTGGAATGGGAAGAGGATCCCTGGGTCTCCAGAGATCAGGGGAGAC
940735	0.0446475	0.00589135	1.22611	up	MGP	4256	Homo sapiens matrix Gla protein (MGP), mRNA.	GO:0001502|GO:0001503|GO:0007275|GO:0007605|GO:0030154|GO:0030500	GO:0005576|GO:0005578	GO:0005201|GO:0005509|GO:0008147	chr12	15038735	15038784	GGAGCCTCTCTCCCTACTGCTGCTACACAAGACCCTGAGACTGACCTGCA
1980291	2.10061e-05	2.43687e-07	1.5433	down	RAD54L	8438	Homo sapiens RAD54-like (S. cerevisiae) (RAD54L), mRNA.	GO:0000724|GO:0006310|GO:0007126|GO:0010212|GO:0042493|GO:0051276	GO:0005634	GO:0000166|GO:0003677|GO:0004386|GO:0005524|GO:0016787	chr1	46516548	46516597	GCTGGTCTGGGTGTAGCTCTTAGAGGAAGGAGATAGGGAAAAGGGGCTCC
5340048	0.00938097	0.000711101	1.34917	down	UBE2E3	10477	Homo sapiens ubiquitin-conjugating enzyme E2E 3 (UBC4/5 homolog, yeast) (UBE2E3), transcript variant 1, mRNA.	GO:0001558|GO:0006511|GO:0043687|GO:0051246	GO:0005634|GO:0005730|GO:0005737	GO:0004842|GO:0005515|GO:0016874	chr2	181635873	181635922	GTATGCAGTGTGAAGGAGCAGAAGGCATCTTCTCACTGTGCTGCAAATCT
2680021	4.32398e-05	6.27593e-07	1.54778	up	TBC1D2	55357	Homo sapiens TBC1 domain family, member 2 (TBC1D2), mRNA.	GO:0032313|GO:0032313|GO:0032313|GO:0032313	GO:0005622|GO:0005622|GO:0005622|GO:0005622	GO:0005096|GO:0005097|GO:0005097|GO:0005097|GO:0005097	chr9	100001298	100001347	CCCTCAGTTTCCCCACTGGGACATTGTGTGCTGCAAAGCCATTGGTTGGG
2120445	0.0220936	0.00223534	1.24457	down	BRIX1	55299	Homo sapiens BRX1, biogenesis of ribosomes, homolog (S. cerevisiae) (BRIX1), mRNA.				chr5	34925065	34925364	CCAGTCACCAAACATGCATCGGCGTGTCATAAGATCCATCACAGCTGCAA
1110722	0.0216207	0.00216574	1.26481	down	BRIX1	55299	Homo sapiens BRX1, biogenesis of ribosomes, homolog (S. cerevisiae) (BRIX1), mRNA.				chr5	34925433	34925482	CCACATGATCCCACTGCAGATGTTTTTGTAACACCAGCTGAGGAGAAACC
2690224	3.75573e-07	1.37274e-09	1.95916	down	ISG20L2	81875	Homo sapiens interferon stimulated exonuclease gene 20kDa-like 2 (ISG20L2), mRNA.	GO:0042254	GO:0005622|GO:0005634	GO:0003676|GO:0004527|GO:0016787	chr1	156692687	156692736	AACAGCATCCTCTTCCACGCTCAGAAGTGTTCTGGTTGGGGCCAGGCATG
3890348	0.000401302	1.09902e-05	1.53702	down	MFF	56947	Homo sapiens mitochondrial fission factor (MFF), nuclear gene encoding mitochondrial protein, mRNA.		GO:0005739|GO:0005741|GO:0016020|GO:0016021		chr2	227930251	227930300	TCTGTCACTCAGCTGTATTCACGTCTGAGCAGTTCTGCAGTAACACCTGC
6020170	0.000532401	1.60263e-05	1.42196	down	MCM4	4173	Homo sapiens minichromosome maintenance complex component 4 (MCM4), transcript variant 1, mRNA.	GO:0006268|GO:0006260|GO:0006260|GO:0006268|GO:0006270|GO:0006350|GO:0006355	GO:0005634|GO:0005654|GO:0005654|GO:0005654|GO:0005654|GO:0005654|GO:0005654|GO:0005654|GO:0005730	GO:0003678|GO:0003697|GO:0005515|GO:0016787|GO:0017111|GO:0000166|GO:0003677|GO:0003678|GO:0003697|GO:0005515|GO:0005524|GO:0017111	chr8	48889351	48889400	AAGGAAGGCTCCCTGCATGTCCTGCTTGCTGCACGCCACATGGGTGTGGT
1400121	0.0412117	0.00527862	1.21678	up	SLCO2B1	11309	Homo sapiens solute carrier organic anion transporter family, member 2B1 (SLCO2B1), mRNA.	GO:0006811	GO:0016020|GO:0016021	GO:0005215|GO:0015347	chr11	74594467	74594516	GCTAGTCTTATCTGGCCTGGTTATTTCCTTGCGGGGAGGAGAGGGTTTGC
6580441	0.0458208	0.00616025	1.20548	up	SLCO2B1	11309	Homo sapiens solute carrier organic anion transporter family, member 2B1 (SLCO2B1), mRNA.	GO:0006811	GO:0016020|GO:0016021	GO:0005215|GO:0015347	chr11	74594660	74594709	CTTCTGAGCAGCTCCCAGTGCCAGGGCTTTGAGACTTTCCCACATGATAA
7570630	0.0459609	0.00618586	1.25459	down	PEG10	23089	Homo sapiens paternally expressed 10 (PEG10), transcript variant 1, mRNA. XM_940378	GO:0006508|GO:0006915|GO:0030154|GO:0032196	GO:0005634|GO:0005737	GO:0003677|GO:0004190|GO:0008270|GO:0046872	chr7	94136574	94136623	CGGAGGGAACTGCAGGGAGACCAACTTATTTAGAGCGAATTGGACATGGA
2650164	0.00875717	0.00065129	1.27434	up	FLJ10986	55277	Homo sapiens hypothetical protein FLJ10986 (FLJ10986), mRNA.				chr1	59912323	59912372	AGGTGGAGTCCGTTCTTGTGGGTGCTGCTGTTCTGGGTGCCTGTGCCTCA
5090541	0.0315245	0.00367045	1.23135	down	IPO9	55705	Homo sapiens importin 9 (IPO9), mRNA.	GO:0000059|GO:0006886	GO:0005634|GO:0005643|GO:0005737	GO:0008536|GO:0008565|GO:0042393	chr1	200110904	200110953	GGAGGATTACTACGAGGATGATGAGGAAGATGACCCTGATGCCCTGAAGG
6520220	0.00108035	4.0403e-05	1.62377	up	CAPRIN1	4076	Homo sapiens cell cycle associated protein 1 (CAPRIN1), transcript variant 1, mRNA.		GO:0005737|GO:0005887|GO:0042995		chr11	34073400	34073998	CGGGGCCCTGCCAATGGATTCAGAGGAGGATATGATGGTTACCGCCCTTC
4920619	0.00324586	0.000176065	1.3925	down	SUZ12	23512	Homo sapiens suppressor of zeste 12 homolog (Drosophila) (SUZ12), mRNA.	GO:0000122|GO:0006350|GO:0006355|GO:0008284|GO:0016568|GO:0016571|GO:0016574	GO:0001739|GO:0005622|GO:0005634|GO:0035098	GO:0003682|GO:0008270|GO:0042054|GO:0046872	chr17	27351688	27351737	CTCTGATTTTTGCCTCTGGATAGTAGATCTCGAGCGTTTATCTCGGGCTT
6760661	0.0374465	0.00463371	1.2368	up	CAPN5	726	Homo sapiens calpain 5 (CAPN5), mRNA.	GO:0006508|GO:0007165	GO:0005622	GO:0004198|GO:0008233	chr11	76514748	76514797	CACACCACCCAGACCTAGGCTTCCCTCTTCTCAGGATCCACCACAGGGTT
6580039	0.000540204	1.63395e-05	1.81872	up	PKM2	5315	Homo sapiens pyruvate kinase, muscle (PKM2), transcript variant 1, mRNA.	GO:0006096|GO:0006096|GO:0006096	GO:0005737|GO:0005739|GO:0005829|GO:0005829	GO:0000287|GO:0004743|GO:0016740|GO:0030955|GO:0000287|GO:0004743|GO:0016740|GO:0030955|GO:0000287|GO:0004743|GO:0004743|GO:0004743|GO:0004743|GO:0004743|GO:0005515|GO:0005515|GO:0005515|GO:0005515|GO:0005515|GO:0016740|GO:0030955	chr15	72494879	72494928	CTTGCAATTATTTGAGGAACTCCGCCGCCTGGCGCCCATTACCAGCGACC
6100521	0.0279477	0.0031178	1.21775	up	PHF11	51131	Homo sapiens PHD finger protein 11 (PHF11), transcript variant 1, mRNA.			GO:0005515|GO:0008270|GO:0046872	chr13	49000893	49000942	CTAGTCGTCTCCTCTTGGCCTCAGCAGCTCTTCCCTGTTCTTACTGGTTG
6290392	0.0134272	0.00114158	1.2854	down	SRRM1	10250	Homo sapiens serine/arginine repetitive matrix 1 (SRRM1), mRNA.	GO:0000398|GO:0008380	GO:0005634|GO:0005681|GO:0016363|GO:0016607	GO:0003677|GO:0003723|GO:0005515|GO:0031202	chr1	24872180	24872229	CAACTTTCAGAGCCTCTTGTATTTGGAAGGCTGGAAGGGCCCAGACTTTG
1980564	0.0174932	0.00163275	1.29899	up	EIF3M	10480	Homo sapiens eukaryotic translation initiation factor 3, subunit M (EIF3M), mRNA.	GO:0006412|GO:0044419		GO:0003743|GO:0005515	chr11	32567202	32567251	TTAAAGTGGCAGCATCTTGTGGGGCCATCCAGTACATCCCAACTGAGCTG
3440452	0.0193771	0.00187141	1.27347	up	ADAM15	8751	Homo sapiens ADAM metallopeptidase domain 15 (ADAM15), transcript variant 4, mRNA.	GO:0006508|GO:0006508|GO:0006508|GO:0006508|GO:0006508|GO:0006508|GO:0006508|GO:0007155|GO:0007160	GO:0016020|GO:0016021|GO:0016020|GO:0016021|GO:0016020|GO:0016021|GO:0016021|GO:0016020|GO:0016021|GO:0016020|GO:0016021	GO:0004222|GO:0004222|GO:0008233|GO:0008270|GO:0004222|GO:0008233|GO:0008270|GO:0004222|GO:0008233|GO:0008270|GO:0004222|GO:0008233|GO:0008270|GO:0004222|GO:0008233|GO:0008270|GO:0004222|GO:0005515|GO:0008233|GO:0008270|GO:0017124|GO:0046872	chr1	153301807	153301856	CGGGATTGAGGAAGGTCCGCACAGCCTGTCTCTGCTCAGTTGCAATAAAC
3360112	1.06847e-05	9.96135e-08	1.61526	down	TMEM2	23670	Homo sapiens transmembrane protein 2 (TMEM2), mRNA.		GO:0016020|GO:0016021		chr9	73488479	73488528	GGCTGATGGCCTCTACCTTTGTATCCAGGAGAAACTGCAGAGCAGCCCTG
6370164	0.0162116	0.00146903	1.28433	down	LEPROTL1	23484	Homo sapiens leptin receptor overlapping transcript-like 1 (LEPROTL1), mRNA.		GO:0016020|GO:0016021		chr8	30084876	30084925	GCACTGCTACTGTTTTATCCACTTGGCCACAGACTTTTTCTAACAGCTGC
6620356	0.00508805	0.000312377	1.31213	down	ARPP19	10776	Homo sapiens cAMP-regulated phosphoprotein, 19kDa (ARPP19), mRNA.	GO:0045722|GO:0046326	GO:0005737	GO:0005102|GO:0015459	chr15	52839587	52839636	CACTAGCACTTGTGATGCAATAGAACACTTCGCCTGTACTGAAAGGGCCA
2140368	0.0228706	0.00234667	1.29286	down	ARPP19	10776	Homo sapiens cAMP-regulated phosphoprotein, 19kDa (ARPP19), mRNA.	GO:0045722|GO:0046326	GO:0005737	GO:0005102|GO:0015459	chr15	52839885	52839934	CTCAGCACACACTGCCAGTCTTCCCCAATATCTGTCTCCTCTCAATTCCC
3520220	0.00624821	0.000410413	1.31755	down	PTPDC1	138639	Homo sapiens protein tyrosine phosphatase domain containing 1 (PTPDC1), transcript variant 1, mRNA.	GO:0006470		GO:0004725|GO:0008138|GO:0016787	chr9	95911566	95911615	TGGGAAATTGAGTCCAGTGGATGTTAATGGAGTGGGTTGCCCATCCCTGA
3190022	2.14364e-05	2.49815e-07	1.55225	down	KATNB1	10300	Homo sapiens katanin p80 (WD repeat containing) subunit B 1 (KATNB1), mRNA.	GO:0006605|GO:0007026|GO:0007049|GO:0007067|GO:0031117|GO:0051301	GO:0000922|GO:0005737|GO:0005856|GO:0005874|GO:0008352|GO:0030424	GO:0008017|GO:0008568|GO:0045502|GO:0046982	chr16	56348488	56348537	AGGAGGTGATGCTGGTCCCTGGCCACCTCTACAGCCCTGAACTCTTGAGA
3420561	0.00528188	0.000329033	1.28746	down	RPA2	6118	Homo sapiens replication protein A2, 32kDa (RPA2), mRNA.	GO:0000718|GO:0006261|GO:0006297	GO:0005634|GO:0005654|GO:0005654|GO:0005654|GO:0005654|GO:0005662	GO:0003676|GO:0003676|GO:0003697|GO:0005515|GO:0005515	chr1	28218125	28218174	TGACGTGTGTTTCTGTGAACATGAAGTTCTGCGGTAGTGCCTCCAGGGGC
6270646	0.0123858	0.00102942	1.36375	down	MYC	4609	Homo sapiens v-myc myelocytomatosis viral oncogene homolog (avian) (MYC), mRNA.	GO:0006355|GO:0006355|GO:0006355|GO:0006355|GO:0006355|GO:0001783|GO:0001836|GO:0006309|GO:0006357|GO:0006879|GO:0006919|GO:0007050|GO:0008284|GO:0008629|GO:0008633|GO:0008634|GO:0009314|GO:0016485|GO:0042474|GO:0042981|GO:0043279|GO:0043473|GO:0048705|GO:0050910	GO:0005634|GO:0005634|GO:0005634|GO:0005634|GO:0005634|GO:0005634|GO:0005819|GO:0016604	GO:0003700|GO:0003700|GO:0003700|GO:0003700|GO:0003677|GO:0003700|GO:0005515|GO:0005515|GO:0005515|GO:0005515	chr8	128822194	128822243	CCTGCGTGACCAGATCCCGGAGTTGGAAAACAATGAAAAGGCCCCCAAGG
3450327	0.0428822	0.00557711	1.21919	down	SNORA41	619569	Homo sapiens small nucleolar RNA, H/ACA box 41 (SNORA41), small nucleolar RNA.				chr2	206735207	206735256	ACTGGTCTGCAGCTGTTCTTATGGTAGCAGTTGTGGCATTCCTCTGTGGG
4260202	6.13604e-05	9.7918e-07	1.48291	down	SNHG7	84973	Homo sapiens small nucleolar RNA host gene 7 (non-protein coding) (SNHG7), transcript variant 2, non-coding RNA.				chr9	139619455	139619504	TACAGATAGAGGCCTCACCCCCTCTGGGACCACTGGCACTCAGGGTGTTT
6280725	0.00211788	0.000100168	1.33435	down	C7orf40	285958	Homo sapiens chromosome 7 open reading frame 40 (C7orf40), non-coding RNA.				chr7	45022882	45023430	CCTGTGCAGGGATGAGGCCTGCCTGTGTTAATACACCTAGTGAGGAGTGG
7610152	5.02227e-05	7.60869e-07	1.58258	down	UBAP2L	9898	Homo sapiens ubiquitin associated protein 2-like (UBAP2L), mRNA.			GO:0005515	chr1	152509657	152509706	TGCTATGGGCCCTGCACTTCCTTTGCTTCCTCCTGTTCACCCTGGTGGTG
5360619	0.000515048	1.53058e-05	1.40016	up	CDC16	8881	Homo sapiens cell division cycle 16 homolog (S. cerevisiae) (CDC16), transcript variant 2, mRNA.	GO:0051301|GO:0006511|GO:0007049|GO:0007088|GO:0008283|GO:0031145|GO:0051301|GO:0051436|GO:0051436|GO:0051437	GO:0005634|GO:0005634|GO:0005654|GO:0005654|GO:0005654|GO:0005737|GO:0005813|GO:0005829|GO:0005829|GO:0005829|GO:0005829|GO:0005829|GO:0005876	GO:0005515|GO:0005515	chr13	114056077	114056126	CCTCTCCATGGCTTAAGAATGTCCCACTTCCTAACGTGACTCCAAACTGC
1430402	0.0017003	7.47564e-05	1.33287	down	NUP85	79902	Homo sapiens nucleoporin 85kDa (NUP85), mRNA.	GO:0015031|GO:0051028|GO:0065002	GO:0000777|GO:0005634|GO:0005643|GO:0005737|GO:0005819|GO:0016020|GO:0031965		chr17	70742400	70742449	GATGACGTCTCGGATTGCCCCTCGGTCTTTCTGGATGACTCTGCTGACAG
1050039	0.0207758	0.00206239	1.2684	down	PROSC	11212	Homo sapiens proline synthetase co-transcribed homolog (bacterial) (PROSC), mRNA.		GO:0005622|GO:0005737		chr8	37756037	37756086	CCTTGTCCTGAGGAGCACTTTCCAGGCATAGTTACAGCTTCCCCACTGTA
610164	0.00365014	0.000204182	1.42715	down	FYN	2534	Homo sapiens FYN oncogene related to SRC, FGR, YES (FYN), transcript variant 2, mRNA.	GO:0006468|GO:0006468|GO:0006816|GO:0007243|GO:0007275|GO:0007612|GO:0007631|GO:0044419|GO:0050852	GO:0005768|GO:0005829|GO:0005886	GO:0000166|GO:0004713|GO:0005515|GO:0005524|GO:0016740|GO:0000166|GO:0004715|GO:0005524|GO:0016740|GO:0030145|GO:0042802|GO:0046872	chr6	112089496	112089545	CAGCGGAACCGCCCAGGATCAGATTGCATGTGACTCTGAAGCTGACGAAC
2480465	0.0315797	0.00367855	1.23169	up	CYB561	1534	Homo sapiens cytochrome b-561 (CYB561), transcript variant 1, mRNA.	GO:0006810|GO:0022900	GO:0005887|GO:0016020	GO:0000293|GO:0004128|GO:0005506|GO:0046872	chr17	61523672	61523721	CACCGCCCAGCCCGCCGCCCGGTTGCCATGGCGACGCCGTCGCGCCACGG
730593	0.0481192	0.00661199	1.21485	down	C10orf76	79591	Homo sapiens chromosome 10 open reading frame 76 (C10orf76), mRNA.		GO:0016020|GO:0016021		chr10	103649191	103649240	GCAGGAATTCAGCAGTGAGAGCATGTCTGGGACCACCTGGACTGCCATCC
3930376	0.0259225	0.0028136	1.26577	up	LCMT1	51451	Homo sapiens leucine carboxyl methyltransferase 1 (LCMT1), transcript variant 2, mRNA.	GO:0006464|GO:0006481		GO:0003880|GO:0005515|GO:0008757|GO:0016740|GO:0008168|GO:0008168	chr16	25083471	25083520	GCAGTCCGCAAACCTCCTGAAGTGGGCAGCCAACAGTTTTGAGAGAGCCA
4730397	0.00474843	0.000287502	1.32733	down	LOC201725	201725	Homo sapiens hypothetical protein LOC201725 (LOC201725), mRNA.				chr4	159807520	159807569	TCCTGATACCAAGATGAGAAGATGGCTCTAATCAGCTGAGACAGCACCAG
7330253	9.3099e-06	8.28511e-08	1.64319	down	MCM5	4174	Homo sapiens minichromosome maintenance complex component 5 (MCM5), mRNA.	GO:0006270|GO:0006270|GO:0051301|GO:0006260|GO:0006260|GO:0006270|GO:0006350|GO:0006355	GO:0005634|GO:0005634|GO:0005634|GO:0005654|GO:0005654|GO:0005654|GO:0005654|GO:0005654|GO:0005654|GO:0005654	GO:0003677|GO:0005524|GO:0000166|GO:0003677|GO:0005524|GO:0000166|GO:0003677|GO:0005524|GO:0000166|GO:0003677|GO:0005515|GO:0005515|GO:0005515|GO:0005524	chr22	34149319	34150180	GGACTTCACCAAGCAGAAATACCCGGAGCACGCCATCCACAAGGTGCTGC
3060035	0.0139258	0.00119208	1.25666	down	HNRNPR	10236	Homo sapiens heterogeneous nuclear ribonucleoprotein R (HNRNPR), transcript variant 2, mRNA.	GO:0000398|GO:0008380	GO:0005634|GO:0005681|GO:0030530	GO:0000166|GO:0003723|GO:0005515	chr1	23636713	23636762	TGCTCTTGGACATTATTGGGCTTGCAGAGTTCCCTTATTCTGGGGATTAC
510253	0.0257868	0.00279633	1.36383	up	FBXW11	23291	Homo sapiens F-box and WD repeat domain containing 11 (FBXW11), transcript variant 1, mRNA.	GO:0006511|GO:0016055|GO:0016567	GO:0000151|GO:0005737	GO:0004842|GO:0005515|GO:0005515	chr5	171290069	171290118	CCCCAGCAGGTTCTCAAAGCTCCCAAGTCCTCCCTACGACACAGCCCAAA
520682	9.58214e-05	1.75624e-06	1.5422	up	CPA4	51200	Homo sapiens carboxypeptidase A4 (CPA4), mRNA.	GO:0006508|GO:0016573	GO:0005576	GO:0004181|GO:0008233|GO:0008237|GO:0008270|GO:0046872	chr7	129750916	129750965	GCCCTGGCACATTCCCATTTGTGCTGTGGTGTATCCTGTGTTTCCTTGTC
10142	0.00119229	4.58525e-05	1.49303	down	CD164	8763	Homo sapiens CD164 molecule, sialomucin (CD164), mRNA.	GO:0007162|GO:0008285|GO:0030097|GO:0006955|GO:0007155|GO:0007157|GO:0007165|GO:0007275|GO:0008285	GO:0005634|GO:0005737|GO:0005634|GO:0005737|GO:0005768|GO:0005887|GO:0005576|GO:0005634|GO:0005737|GO:0005886|GO:0005887		chr6	109794680	109794729	GTTAGATTTTGCAAGTCTACAAATGAGCTCTTGCAACAGAACTCACAGCC
4390612	0.000828142	2.80317e-05	1.47265	down	CCDC14	64770	Homo sapiens coiled-coil domain containing 14 (CCDC14), mRNA.				chr3	125115379	125115428	ATACCAGGACTTCTTAGCTCAGTATCATCTCCCTTCATGTAAGCAGCACG
290441	0.0103704	0.000816319	1.26113	down	QSOX2	169714	Homo sapiens quiescin Q6 sulfhydryl oxidase 2 (QSOX2), mRNA.	GO:0045454|GO:0055114|GO:0055114	GO:0005576|GO:0005634|GO:0005886|GO:0016021|GO:0031965	GO:0016491|GO:0016972|GO:0016972	chr9	139098426	139098475	ATGGCCATACTCAGACACACCTTGTGTGGCCTGCTCAGAGCTGGATGCCA
540204	0.000923594	3.30729e-05	1.40862	down	KCNS3	3790	Homo sapiens potassium voltage-gated channel, delayed-rectifier, subfamily S, member 3 (KCNS3), mRNA.	GO:0006811|GO:0006813	GO:0005886|GO:0008076|GO:0016021	GO:0005244|GO:0005251|GO:0005515|GO:0015459|GO:0030955	chr2	17977114	17977163	CCAGTCTCTCTTCTGTAGGCATTGTGGTGAGCGATCCTGACTCCACAGAT
5080259	0.015153	0.00133225	1.28102	down	KCNS3	3790	Homo sapiens potassium voltage-gated channel, delayed-rectifier, subfamily S, member 3 (KCNS3), mRNA.	GO:0006811|GO:0006813	GO:0005886|GO:0008076|GO:0016021	GO:0005244|GO:0005251|GO:0005515|GO:0015459|GO:0030955	chr2	17977567	17977616	CTGACAAGTAGAATCAAAGGTGCAGCTGACTGAGACGACATGCATGTAAG
7610538	0.000916665	3.27276e-05	1.37522	down	H1FX	8971	Homo sapiens H1 histone family, member X (H1FX), mRNA.	GO:0006334	GO:0000786|GO:0005634|GO:0005694	GO:0003677	chr3	130516558	130516607	TGCTTTAGGTTTTTGAAACAGCCCCGGCGACGCCTCTATTGGCTCTCGGC
5690064	0.00810086	0.000584456	1.32126	down	LASS6	253782	Homo sapiens LAG1 homolog, ceramide synthase 6 (LASS6), mRNA.	GO:0006355|GO:0008610|GO:0006355	GO:0005634|GO:0005783|GO:0005789|GO:0016020|GO:0016021|GO:0031965|GO:0005634|GO:0016020|GO:0016021	GO:0003700|GO:0043565|GO:0003700|GO:0043565	chr2	169338911	169338960	CACAGGTCCATGAAAGTTTGGCTTCCTGGTTTGATGTCTGTTGCGTGGCC
1400133	0.00288559	0.000150227	1.34464	up	YIPF1	54432	Homo sapiens Yip1 domain family, member 1 (YIPF1), mRNA.		GO:0016020|GO:0016021|GO:0030133		chr1	54317792	54317841	CCAGTGTCTGGATGGTGCCACACTGGCGCCTAATCACCCGTTTAACAAGC
20164	0.023862	0.00250615	1.24096	up	YIPF1	54432	Homo sapiens Yip1 domain family, member 1 (YIPF1), mRNA.		GO:0016020|GO:0016021|GO:0030133		chr1	54317514	54317563	CTACCTGGGGGATCCTCTTCTCTCCAAATGTTAGCCATCCTGAAGTAGCC
4920537	3.83944e-05	5.36927e-07	1.53125	down	POLA2	23649	Homo sapiens polymerase (DNA directed), alpha 2 (70kD subunit) (POLA2), mRNA.	GO:0000060|GO:0006260	GO:0005634|GO:0005654|GO:0005654|GO:0005654|GO:0005658	GO:0003674|GO:0003677|GO:0003887|GO:0005515|GO:0046982	chr11	64821556	64821605	TCCAGAAGTAAGCCAGCTGTGGATCCCGCCCACTCAGAAAAGGCGAGAAG
6560156	2.70986e-05	3.4451e-07	1.53062	down	DUSP3	1845	Homo sapiens dual specificity phosphatase 3 (vaccinia virus phosphatase VH1-related) (DUSP3), mRNA.	GO:0006470|GO:0006470	GO:0005654	GO:0004725|GO:0008138|GO:0016787|GO:0016791|GO:0004725|GO:0004725|GO:0008138|GO:0016787	chr17	39199431	39199480	CCATGGTGATGGATGGTTTGGAAAGGGAATGTTGGTGCCTTTTGTGCCAC
6100273	0.000399691	1.09249e-05	1.41015	up	SNX12	29934	Homo sapiens sorting nexin 12 (SNX12), mRNA.	GO:0007154|GO:0015031		GO:0005515|GO:0035091	chrX	70282710	70282759	CGGCGGCGCTACAGTGACTTTGAGTGGCTGAAAAATGAGCTGGAGAGAGA
460280	0.0047813	0.000289998	1.31247	down	DUSP12	11266	Homo sapiens dual specificity phosphatase 12 (DUSP12), mRNA.	GO:0006464|GO:0006470|GO:0008152	GO:0005622|GO:0005634	GO:0004725|GO:0008138|GO:0008270|GO:0016491|GO:0016787|GO:0046872	chr1	159993226	159993275	GTTGGGTTCCTTCAACTGGTATGGTGAACAGTGCTCTTGTGGTAGGTGGA
6760021	0.00140392	5.71148e-05	1.34263	down	SNHG7	84973	Homo sapiens small nucleolar RNA host gene 7 (non-protein coding) (SNHG7), transcript variant 1, non-coding RNA.				chr9	139621498	139622341	GGGAAGCCTGGACGTCTGCTCACTGGAGATGACACGTGCGTGGGGTGTTG
510762	0.0485527	0.00669986	1.20075	up	FAM62B	57488	Homo sapiens family with sequence similarity 62 (C2 domain containing) member B (FAM62B), mRNA.		GO:0005886|GO:0016021		chr7	158216596	158216645	GCCAAATGCAGGCCTGTGTGTAGCTGTGTGTTTTTTCTGTGGTTGCCGCA
4010092	0.0282946	0.00317448	1.28414	up	ZNF664	144348	Homo sapiens zinc finger protein 664 (ZNF664), mRNA.	GO:0006350|GO:0006355|GO:0008150	GO:0005575|GO:0005622|GO:0005634|GO:0005622	GO:0003674|GO:0003677|GO:0008270|GO:0046872|GO:0003676|GO:0008270	chr12	123064832	123064881	TGGCATTCGCAAGCAGTGGGGAAGGGGAGAGATGCCGAGGTGGTCAGTAT
240154	0.0256521	0.00277474	1.2599	down	RRP1	8568	Homo sapiens ribosomal RNA processing 1 homolog (S. cerevisiae) (RRP1), mRNA.	GO:0006364	GO:0005634|GO:0005730|GO:0030688		chr21	44048161	44048210	TGTAGACTCAGGACCGTGGCTCCAGAACTCCTGTGCCAGGCGGGAGGGAA
3140162	0.00412264	0.000239785	1.40202	down	SAPS1	22870	Homo sapiens SAPS domain family, member 1 (SAPS1), mRNA.		GO:0005737		chr19	60433144	60433193	GAGTGGGGGCCGTGCCTTTGCCCAGACCCTGCACTTTCAACCAGGCCAGT
1430670	0.00518045	0.000320245	1.37642	down	SNRNP70	6625	Homo sapiens small nuclear ribonucleoprotein 70kDa (U1) (SNRNP70), mRNA.				chr19	49611629	49611678	ATGGAGTCTGAGGGCGGCGACGGCTACCTGGCTCCGGAGAATGGGTATTT
2450358	6.38562e-05	1.03865e-06	1.50022	down	CKS1B	1163	Homo sapiens CDC28 protein kinase regulatory subunit 1B (CKS1B), mRNA.	GO:0007049|GO:0007049|GO:0000079|GO:0007049|GO:0008283|GO:0051301	GO:0005654	GO:0016301|GO:0016538|GO:0016301|GO:0016538|GO:0005515|GO:0005515|GO:0016538	chr1	153218093	153218142	CCTAAGCTGAGTGTGACCCCAGAAGCCACGATGTGCTCTGTATCCAGAAC
730068	0.0393151	0.00494823	1.20852	up	JARID1A	5927	Homo sapiens Jumonji, AT rich interactive domain 1A (RBBP2-like) (JARID1A), mRNA.	GO:0006350|GO:0006355|GO:0006366|GO:0007275|GO:0016568|GO:0055114	GO:0005622|GO:0005634|GO:0005737|GO:0005622|GO:0005634|GO:0005737|GO:0005622|GO:0005634|GO:0005737|GO:0019907	GO:0003677|GO:0005515|GO:0008270|GO:0046872|GO:0003677|GO:0005515|GO:0008270|GO:0046872|GO:0003700|GO:0005506|GO:0005515|GO:0008270|GO:0016491|GO:0016702|GO:0046872	chr12	263881	263930	GCTTTTTCCCTTGCAGCCCTGACCCCAATGTCTGCTGTTTCCAACACTGG
1260039	0.0173543	0.00161519	1.26566	up	THBS3	7059	Homo sapiens thrombospondin 3 (THBS3), mRNA.	GO:0007155|GO:0007160	GO:0005576|GO:0005576|GO:0031093	GO:0005198|GO:0005509|GO:0005515	chr1	155165402	155165451	CAAGGGGTATTACTCAGGCACTAACCCCAGGAAAGATGACAGCACATTGC
4150646	0.00063154	1.98715e-05	1.41703	up	EXOC1	55763	Homo sapiens exocyst complex component 1 (EXOC1), transcript variant 1, mRNA.	GO:0006887|GO:0015031	GO:0000145		chr4	56463276	56463325	GAAGGTGTTGAAGCTCGCGTGGCACAGGGCATAAGGGAGGAGGAAGTAAG
70736	0.0468613	0.00637072	1.24992	up	BP75	23629	Homo sapiens bromodomain containing protein 75 kDa pseudogene (BP75) on chromosome 6.				chr6	118929899	118929948	GAAGACTGGGACTTCCCCATCCTGTGGATCCCATTGTAGGAGAGCCAGAA
7650358	0.00139554	5.66259e-05	1.37347	up	TGFBI	7045	Homo sapiens transforming growth factor, beta-induced, 68kDa (TGFBI), mRNA.	GO:0007162|GO:0007601|GO:0008283|GO:0050896	GO:0005576|GO:0005578|GO:0005615	GO:0005178|GO:0005515	chr5	135427171	135427220	CCAGCCTCATGGGAAGTCCTGGCACAGTTTTTGTAAAGCCCTTGCACAGC
3310491	0.0135842	0.00115996	1.25734	up	IRAK4	51135	Homo sapiens interleukin-1 receptor-associated kinase 4 (IRAK4), mRNA.	GO:0001816|GO:0006468|GO:0007249|GO:0019221|GO:0001816|GO:0006468|GO:0019221|GO:0001816|GO:0019221	GO:0005634|GO:0005737|GO:0005829|GO:0005829	GO:0000166|GO:0000287|GO:0004674|GO:0005149|GO:0005515|GO:0005515|GO:0005524|GO:0016740|GO:0004672|GO:0004872|GO:0005149|GO:0005524|GO:0004872|GO:0005149|GO:0005515|GO:0016301	chr12	42467719	42467768	GCTTCAGATGATAACCACAGCCTGGGCTGACACCTGGATTTCAGCTTTGC
4860239	0.000137505	2.79702e-06	2.21655	up	WDR1	9948	Homo sapiens WD repeat domain 1 (WDR1), transcript variant 1, mRNA.	GO:0007605	GO:0005737|GO:0005856	GO:0003779|GO:0005515	chr4	10099367	10099416	CATACCGGCTGGCCACGGGAAGCGATGATAACTGCGCGGCATTCTTTGAG
2350612	0.0395604	0.00498958	1.22832	up	PHEX	5251	Homo sapiens phosphate regulating endopeptidase homolog, X-linked (hypophosphatemia, vitamin D resistant rickets) (PHEX), transcript variant 1843529, mRNA.	GO:0001501|GO:0001503|GO:0006464|GO:0006508|GO:0007267	GO:0005886|GO:0005887	GO:0004177|GO:0004222|GO:0008233|GO:0008270|GO:0046872	chrX	22175967	22176016	CATGGACTCCTGCCGACTCTGGTAGCTGGGACGCTGGTTTATGGCATCCT
670026	0.0220355	0.0022192	1.2889	down	CRLF3	51379	Homo sapiens cytokine receptor-like factor 3 (CRLF3), mRNA.				chr17	26134257	26134306	GCACGTGTGTATCCAATCTGCCTGTGACATGCATTTTACTCTTTGCAGAG
4480348	0.0303227	0.00349519	1.24703	up	FBXW9	84261	Homo sapiens F-box and WD repeat domain containing 9 (FBXW9), mRNA.	GO:0006511			chr19	12799789	12799838	CCACCCAGGGGGCCGCTTCCCACTCTTGGGCCCTGGTTTTGTTATGATTT
6380187	0.00299613	0.00015744	1.31537	up	C21orf57	54059	Homo sapiens chromosome 21 open reading frame 57 (C21orf57), transcript variant 1, mRNA.			GO:0008233|GO:0008237|GO:0008270|GO:0046872	chr21	46531282	46531331	GCGAGTCATCCCCATCAGGAGAGCGCCACTTCGCAGTAAGATCGAGATTG
4850079	0.00147626	6.16998e-05	1.34594	down	WDR5	11091	Homo sapiens WD repeat domain 5 (WDR5), transcript variant 1, mRNA.	GO:0001501	GO:0005622|GO:0005634	GO:0005515	chr9	136014547	136014596	CCTGCCCCTCTGTTTCCGATGAGGTGTACGGATGAGTGACCTGCACTAAG
1500246	0.000510492	1.51433e-05	1.44554	down	ARV1	64801	Homo sapiens ARV1 homolog (S. cerevisiae) (ARV1), mRNA.	GO:0006629|GO:0006665	GO:0016020|GO:0016021		chr1	229202656	229202705	GGATACCCACCCCCACAAATGCACCCAAGAGACAAGCCATTTACATACAG
630278	0.00293218	0.000153148	1.36161	down	H1F0	3005	Homo sapiens H1 histone family, member 0 (H1F0), mRNA.	GO:0006334	GO:0000786|GO:0005634|GO:0005694|GO:0005794|GO:0005856	GO:0003677	chr22	36533168	36533217	TCTAGGGCTAGTACTTAGTTTCACACCCGGGAGCTGGGAGAAAAAACCTG
7400653	9.353e-05	1.69937e-06	1.49352	up	PFKFB4	5210	Homo sapiens 6-phosphofructo-2-kinase/fructose-2,6-biphosphatase 4 (PFKFB4), mRNA.	GO:0006003|GO:0008152	GO:0005575|GO:0005829	GO:0000166|GO:0003873|GO:0003873|GO:0004331|GO:0005524|GO:0016301|GO:0016740|GO:0016787	chr3	48555580	48555629	GCTGGCGTGCCCATGTTGCAGATATTTTCCCGAGTTCCCCAGAATGGATG
6770707	0.0364085	0.00447002	1.22014	up	SQRDL	58472	Homo sapiens sulfide quinone reductase-like (yeast) (SQRDL), nuclear gene encoding mitochondrial protein, mRNA.	GO:0055114	GO:0005739|GO:0005743	GO:0016491	chr15	43768692	43770496	GGAATATGATGCTAAGGGGTTACTGGGGAGGACCAGCGTTTCTGCGCAAG
5960731	0.00217216	0.000104017	1.3616	up	SOD2	6648	Homo sapiens superoxide dismutase 2, mitochondrial (SOD2), nuclear gene encoding mitochondrial protein, transcript variant 1, mRNA.	GO:0000303|GO:0001315|GO:0001836|GO:0006302|GO:0006357|GO:0006801|GO:0006979|GO:0042542|GO:0043066|GO:0055114|GO:0000303|GO:0001315|GO:0001836|GO:0006302|GO:0006357|GO:0006801|GO:0006979|GO:0042542|GO:0043066|GO:0055114	GO:0005739|GO:0005743|GO:0005759|GO:0005739|GO:0005743	GO:0004784|GO:0016491|GO:0030145|GO:0046872|GO:0004784|GO:0016491|GO:0046872	chr6	160102798	160102847	GAATTGGGCAGCTCATGCTTGAGACCCAATCTCCATGATGACCTACAAGC
4860438	0.0259419	0.00281709	1.26866	up	DMXL2	23312	Homo sapiens Dmx-like 2 (DMXL2), mRNA.		GO:0008021|GO:0016020|GO:0030054|GO:0031410|GO:0045202	GO:0017137	chr15	51742395	51742444	GACATCAGGCAAAGGCAGCTCATTCACACGTTCCAGGCCCATGACTCAGC
5090097	0.0127607	0.00106733	1.29764	down	SYS1	90196	Homo sapiens SYS1 Golgi-localized integral membrane protein homolog (S. cerevisiae) (SYS1), transcript variant 1, mRNA.	GO:0015031	GO:0000139|GO:0005794|GO:0016020|GO:0016021		chr20	43430932	43430981	CCATCTGTGGTTGGAGCGCCTCTTTGGGATTCACTTCAAGGTCTTGTGCC
290731	0.000414549	1.15067e-05	1.56678	down	POLD1	5424	Homo sapiens polymerase (DNA directed), delta 1, catalytic subunit 125kDa (POLD1), mRNA.	GO:0000084|GO:0000731|GO:0000731|GO:0006139|GO:0006297|GO:0009411	GO:0005634|GO:0005654|GO:0005654	GO:0000166|GO:0003677|GO:0003682|GO:0003887|GO:0004527|GO:0005515|GO:0008270|GO:0016740|GO:0016779|GO:0016787|GO:0046872	chr19	55612125	55612248	GAGTTCTGCCAGCCCCGGGAGTCTGAGCTGTATCAGAAGGAGGTATCCCA
940474	0.000207168	4.60909e-06	1.45072	up	SRPX2	27286	Homo sapiens sushi-repeat-containing protein, X-linked 2 (SRPX2), mRNA.		GO:0005576	GO:0004497|GO:0005506|GO:0009055|GO:0020037	chrX	99812607	99812656	CCAGCGTCGGGAGCAAAGGGACATATGCGAGTGAACTTGAGCCAGGGCAT
5700324	0.013406	0.00113694	1.24835	down	UBL4A	8266	Homo sapiens ubiquitin-like 4A (UBL4A), mRNA.	GO:0006464|GO:0006464	GO:0005634|GO:0005737|GO:0005634|GO:0005737	GO:0019787	chrX	153712215	153712264	CAGCAGGTGAGCAATTTCACCCAGTGTCTTCTGCCTCCCTCTGCGTTGGT
4810400	0.0243972	0.0025886	1.2444	up	ZNF512B	57473	Homo sapiens zinc finger protein 512B (ZNF512B), mRNA.	GO:0006350|GO:0006355	GO:0005622|GO:0005634	GO:0003677|GO:0008270|GO:0046872	chr20	62588093	62588142	GCCCTGGTCCCGAGTGGCGTGGGGACGGGCCATCACTGTATGTATTAAAA
2490181	0.0250131	0.00267912	1.24156	down	SFRS10	6434	Homo sapiens splicing factor, arginine/serine-rich 10 (transformer 2 homolog, Drosophila) (SFRS10), mRNA.	GO:0000398|GO:0008380	GO:0005634	GO:0000166|GO:0003723|GO:0005515|GO:0005515|GO:0031202	chr3	187117247	187117296	CAGGTCCTTTGCTTACCAAAGGAGGCCCAATTTCACTCAAATGTTTTGAG
4590441	0.000903794	3.22202e-05	1.3874	up	CYB5R3	1727	Homo sapiens cytochrome b5 reductase 3 (CYB5R3), transcript variant S, mRNA.	GO:0006695|GO:0008015|GO:0055114	GO:0005743|GO:0005737|GO:0005739|GO:0005741|GO:0005743|GO:0005783|GO:0005789|GO:0005833|GO:0016020	GO:0009055|GO:0016491|GO:0004128|GO:0009055|GO:0016491	chr22	41344854	41344903	TGAGCAGTGCCTCTTGTCTGAGGGACATATCAGTGACCTCGACGTTGCCT
3170273	0.00876677	0.000653862	1.28827	up	FER1L3	26509	Homo sapiens fer-1-like 3, myoferlin (C. elegans) (FER1L3), transcript variant 2, mRNA.	GO:0006936|GO:0008015	GO:0005634|GO:0005886|GO:0016021|GO:0031965		chr10	95056547	95056596	GCCATGTCACCGAGCCCCATTGATTCCCAGAGGGTCTTAGTCCTGGAAAG
7200703	2.79876e-05	3.58777e-07	1.60821	down	KAT2B	8850	Homo sapiens K(lysine) acetyltransferase 2B (KAT2B), mRNA.				chr3	20164793	20164938	ACAGTGCTTTGTACCGGATCTGCTGAAGCATCTGTCCAGCTGGTATCCTG
2970292	0.0142225	0.00122577	1.25403	down	SMC3	9126	Homo sapiens structural maintenance of chromosomes 3 (SMC3), mRNA.	GO:0006281|GO:0007049|GO:0007052|GO:0007062|GO:0007067|GO:0007126|GO:0007165|GO:0009294|GO:0051301	GO:0000800|GO:0000922|GO:0005604|GO:0005634|GO:0005694|GO:0005737|GO:0008278|GO:0016363	GO:0000166|GO:0003777|GO:0005524|GO:0016887|GO:0045502|GO:0046982	chr10	112344125	112346165	TGGTAGCCCTTGCTCTGATTTTTGCCATTCAGAAATGTGACCCGGCTCCA
5670333	0.00476987	0.000289053	1.36853	down	ROCK2	9475	Homo sapiens Rho-associated, coiled-coil containing protein kinase 2 (ROCK2), mRNA.	GO:0000910|GO:0006468|GO:0007242|GO:0000910|GO:0006468|GO:0007242	GO:0005622|GO:0005737|GO:0005886	GO:0000166|GO:0004674|GO:0005198|GO:0005515|GO:0005524|GO:0008270|GO:0016740|GO:0019992|GO:0046872|GO:0004674|GO:0005515|GO:0005524|GO:0008270|GO:0046872	chr2	11323063	11323112	GTACCGGGTTAAGAAAACTGGCAACTGGGAAGAAGTGGCCTCAAAGGCAC
4730349	0.0331982	0.00393039	1.22319	up	PNKD	25953	Homo sapiens paroxysmal nonkinesiogenic dyskinesia (PNKD), transcript variant 2, mRNA.		GO:0005634|GO:0005737|GO:0005739|GO:0016020	GO:0008270|GO:0016787|GO:0046872	chr2	218919403	218919452	CATGCCTCTGTGCCTTCGCTCATGCTGTTTCTTCCGACTGGAATGCCTTC
1400450	0.00390916	0.000223205	1.36487	up	BRE	9577	Homo sapiens brain and reproductive organ-expressed (TNFRSF1A modulator) (BRE), transcript variant 3, mRNA.	GO:0006511|GO:0006915|GO:0006974|GO:0007165|GO:0045768	GO:0000152|GO:0005634|GO:0005737	GO:0000268|GO:0005164|GO:0005515|GO:0005515	chr2	28152762	28205677	CCTGCCTCTGTTTTTCCCTCGAGACCAGCCAACTCTCACATTTCAGTCCG
4480220	0.0315018	0.00366614	1.26647	down	FGFRL1	53834	Homo sapiens fibroblast growth factor receptor-like 1 (FGFRL1), transcript variant 3, mRNA.	GO:0001558	GO:0016020|GO:0016021	GO:0004872|GO:0005007	chr4	1010359	1010408	AATGATGGAAGGAAGACTGGGTTGCAGGGACTGTGGTCTCTCCTGGGGCC
5870482	0.0112805	0.000911263	1.25886	up	KDM5B	10765	Homo sapiens lysine (K)-specific demethylase 5B (KDM5B), mRNA.				chr1	202696718	202696767	AAGGGGTCTGTTCTGCAGTGGAGAAGACATTCTGGTGACCAGACTTTTGC
1050470	3.42815e-06	2.43212e-08	1.76056	down	NDC80	10403	Homo sapiens NDC80 homolog, kinetochore complex component (S. cerevisiae) (NDC80), mRNA.	GO:0000070|GO:0007049|GO:0007051|GO:0048015|GO:0051301	GO:0000775|GO:0000777|GO:0005634	GO:0005515|GO:0005515|GO:0005515|GO:0005515	chr18	2598715	2598764	GGAAGCAGAGGAAGAGGATGAAAAATGTGCCAGTGAGCTTGAGTCCTTGG
6290292	0.00169503	7.38612e-05	1.38973	down	POMT2	29954	Homo sapiens protein-O-mannosyltransferase 2 (POMT2), mRNA.	GO:0006493	GO:0005783|GO:0005789|GO:0016020|GO:0016021	GO:0000287|GO:0004169|GO:0016757	chr14	76811245	76811294	GAGTGCTCAGGTTCTGTTTTCTGGAAGTTGCTGGAGAAGGGCTGTCAGGG
2940291	0.00828133	0.00060196	1.28443	up	QPRT	23475	Homo sapiens quinolinate phosphoribosyltransferase (QPRT), mRNA.	GO:0008152|GO:0009435|GO:0034213|GO:0051259	GO:0005575|GO:0005829	GO:0004514|GO:0004514|GO:0004514|GO:0004514|GO:0016757|GO:0042803	chr16	29616374	29616423	GCTCCTGTGACCTGTCAGGGCTGACTTCACCTCTGCTCATCTCAGTTTCC
1070639	1.42361e-05	1.45543e-07	1.60596	down	CLNS1A	1207	Homo sapiens chloride channel, nucleotide-sensitive, 1A (CLNS1A), mRNA.	GO:0000387|GO:0006810|GO:0006810|GO:0006821|GO:0006884|GO:0008015	GO:0005634|GO:0005737|GO:0005856|GO:0005886		chr11	77005106	77005155	CTGTGTCTGGGTACCCTCTGAGTAGGCCTATAATTCCTACCTTGACTGTG
2940739	4.51599e-05	6.72208e-07	1.54413	down	RASSF1	11186	Homo sapiens Ras association (RalGDS/AF-6) domain family 1 (RASSF1), transcript variant B, mRNA.	GO:0007050|GO:0007242|GO:0007265|GO:0045786	GO:0005634|GO:0005737|GO:0005813|GO:0005819|GO:0005874	GO:0005515|GO:0008270|GO:0019992|GO:0042802|GO:0046872	chr3	50342462	50342511	CTGAGGTCAGGGAGTGCTGGCTCACAGTACAGCATGTGCCTTAATGCTTC
1050672	0.000467655	1.34762e-05	1.44437	down	CKAP2	26586	Homo sapiens cytoskeleton associated protein 2 (CKAP2), transcript variant 2, mRNA.	GO:0006915|GO:0007049	GO:0005737|GO:0005874		chr13	51947829	51947878	CTTGCGTCCCTTGGACTGCCTGTTGATTGATGGAAAGTGTCTGCACTGAC
6280176	0.00550996	0.000349227	1.30472	up	GBE1	2632	Homo sapiens glucan (1,4-alpha-), branching enzyme 1 (glycogen branching enzyme, Andersen disease, glycogen storage disease type IV) (GBE1), mRNA.	GO:0005975|GO:0005978|GO:0006091	GO:0005829	GO:0003844|GO:0003844|GO:0004553|GO:0016757|GO:0043169	chr3	81622208	81622257	CTGCCGAATTGAAGAGGCCTGATTTCAGCTCCACCAGATGCAGATTTGTG
380019	0.00120754	4.66877e-05	1.35575	up	DDIT4L	115265	Homo sapiens DNA-damage-inducible transcript 4-like (DDIT4L), mRNA.	GO:0009968	GO:0005737		chr4	101326239	101326288	AGCTCCAAAGGTTCACTGTGTTTCTGCCGCTGTCCTGGAGTTGTCACCAC
2190553	0.033052	0.00390433	1.26636	down	FZD6	8323	Homo sapiens frizzled homolog 6 (Drosophila) (FZD6), mRNA.	GO:0001736|GO:0001843|GO:0007186|GO:0007275|GO:0016055|GO:0042472	GO:0005887|GO:0016020|GO:0016327|GO:0045177	GO:0004872|GO:0004926|GO:0004930|GO:0042813	chr8	104413852	104413901	CAGTACCTTTCTCAGACATTTTGTAGAATTCATTTCGGCAGCTCACTAGG
5050047	0.0126778	0.00105657	1.283	down	KIAA1967	57805	Homo sapiens KIAA1967 (KIAA1967), transcript variant 1, mRNA.	GO:0006915	GO:0005634|GO:0005737|GO:0005759	GO:0003674|GO:0005515|GO:0005515|GO:0005515	chr8	22477693	22477742	GGCCATCACGGGAATGGAGTCCATGCTAGAAAGAGCTCAGTGTTGGGCTG
150100	1.61472e-05	1.76626e-07	1.61249	up	S100A3	6274	Homo sapiens S100 calcium binding protein A3 (S100A3), mRNA.			GO:0005509|GO:0005515|GO:0008270	chr1	153519825	153519874	GCAGAGCGTGCACCAATGAGACCACGATGGGAAAGGGCCTATTTAACTCC
1410075	0.00551162	0.000350285	1.28412	up	WIPI2	26100	Homo sapiens WD repeat domain, phosphoinositide interacting 2 (WIPI2), transcript variant 2, mRNA.		GO:0043234		chr7	5239468	5239517	GGAACCTGGAGTCAAAAAGAACTGCTTCAGTCCCCGCTGTACCGCCTGCC
1340193	8.00737e-05	1.37853e-06	1.63542	down	DHX30	22907	Homo sapiens DEAH (Asp-Glu-Ala-His) box polypeptide 30 (DHX30), transcript variant 1, mRNA.		GO:0005622|GO:0005737|GO:0005739	GO:0000166|GO:0003725|GO:0005524|GO:0008026|GO:0016787	chr3	47866151	47866200	GCTGACGTATTTCATGGCAGTCAAGTCCAATGGCAGCGTCTTCGTCCGGG
1980180	0.0416515	0.0053526	1.21228	up	C9orf95	54981	Homo sapiens chromosome 9 open reading frame 95 (C9orf95), mRNA.				chr9	76866031	76866080	CTCCCTCTCCAGGGAGCGCATAGATACAGCAGAGCTCACAGTGAGTCAGA
4540646	0.024084	0.00254388	1.22647	up	RNF112	7732	Homo sapiens ring finger protein 112 (RNF112), mRNA.			GO:0003924|GO:0005515|GO:0005525|GO:0008270|GO:0046872	chr17	19260795	19260844	CCTGTTTAGATGGGGGAGTGCCCATGCCCTCTGTGAAGTGCCCAAATGCG
1470519	0.0128275	0.00107564	1.27839	up	C4orf41	60684	Homo sapiens chromosome 4 open reading frame 41 (C4orf41), transcript variant 1, mRNA.				chr4	184629614	184629663	CCTCTGATGGCTGGATACCAGCAGCTGCCATCTCTCAACATCAACTTGCT
6980253	0.0484127	0.00666952	1.32854	down	PTPLB	201562	Homo sapiens protein tyrosine phosphatase-like (proline instead of catalytic arginine), member b (PTPLB), mRNA.		GO:0005783|GO:0005789|GO:0016020|GO:0016021	GO:0005515	chr3	124693098	124693147	ATACTGATCTGTGTTGCATTTCAAAATAAACTGGTGTGTGCTCTGCCTGG
610598	0.00444911	0.000263158	1.31519	up	CHI3L2	1117	Homo sapiens chitinase 3-like 2 (CHI3L2), transcript variant 1, mRNA.	GO:0005975|GO:0006032|GO:0005975|GO:0006032|GO:0005975|GO:0006032	GO:0005739|GO:0005615|GO:0005739	GO:0004568|GO:0003824|GO:0004568|GO:0043169|GO:0004568|GO:0016787|GO:0043169	chr1	111586462	111586511	CCTTACCCTCTTGTCCAAGCAGTCAAGAGAAGCCTTGGCTCCCTGTGAAG
3190524	0.00168301	7.2725e-05	1.39902	down	KNTC1	9735	Homo sapiens kinetochore associated 1 (KNTC1), mRNA.	GO:0006355|GO:0006461|GO:0007049|GO:0007067|GO:0007093|GO:0007096|GO:0051301	GO:0000777|GO:0000922|GO:0005634|GO:0005737|GO:0005828	GO:0003700|GO:0043565|GO:0046983	chr12	121675137	121675186	GCACTGCGGGAAACCTGTGCCTCCAGACACTGCTCCCTGTGAAATTCTGA
1510176	0.0417511	0.00537647	1.24181	up	FSD1	79187	Homo sapiens fibronectin type III and SPRY domain containing 1 (FSD1), mRNA.	GO:0007049|GO:0007067|GO:0051301	GO:0005622|GO:0005634|GO:0005737|GO:0005813|GO:0005874		chr19	4269397	4269446	ATCTCTCCGTGGAGTGGGACGCTATGGGCGGGAAGGTGCAGGATATCAAG
2750598	0.0230572	0.00238169	1.24074	up	ANKRD46	157567	Homo sapiens ankyrin repeat domain 46 (ANKRD46), mRNA.		GO:0016020|GO:0016021		chr8	101602463	101602512	CCTGAGTAACTGGCTGCTTCAGGATCAGCTTGCAGAGTCTTGCTTTTAGG
5670246	0.0148856	0.00130026	1.2958	down	SEMA3C	10512	Homo sapiens sema domain, immunoglobulin domain (Ig), short basic domain, secreted, (semaphorin) 3C (SEMA3C), mRNA.	GO:0006955|GO:0007169|GO:0007275|GO:0042493	GO:0005576|GO:0016020	GO:0004872	chr7	80372949	80372998	GTCACAGTTCCCTTTATTTCACATAAGCCCAAACTGATAGACAGTAACGG
10592	0.0211287	0.00211086	1.23752	up	EFCAB4A	283229	Homo sapiens EF-hand calcium binding domain 4A (EFCAB4A), mRNA.			GO:0005509	chr11	821889	821938	GTGTGTGCCCTCTGCCAGTCTTCGCTCTGTCCCCGTTCAATCAACCCCAT
1030270	0.00132537	5.29362e-05	1.36195	up	FPR1	2357	Homo sapiens formyl peptide receptor 1 (FPR1), mRNA.	GO:0000187|GO:0006928|GO:0006935|GO:0007165|GO:0007186|GO:0007188|GO:0007263	GO:0005768|GO:0005886|GO:0005886|GO:0016021	GO:0004872|GO:0004982	chr19	56941267	56941316	CAGCCTTTTTTCTCTGCTGGTCCCCATATCAGGTGGTGGCCCTTATAGCC
670014	0.00827945	0.000601289	1.318	down	XRCC3	7517	Homo sapiens X-ray repair complementing defective repair in Chinese hamster cells 3 (XRCC3), transcript variant 3, mRNA.	GO:0006281|GO:0006310	GO:0005634	GO:0000166|GO:0003677|GO:0005524|GO:0008094	chr14	104164119	104164168	CCTTACATCTGGCTGGAAAGCAGAGCCTCCTGGGAACACATCTGGCTGCA
1850079	0.0144055	0.00124612	1.33304	down	KIAA1267	284058	Homo sapiens KIAA1267 (KIAA1267), mRNA.		GO:0005634|GO:0005634|GO:0005634|GO:0005737|GO:0005856	GO:0005515	chr17	44107831	44107880	GCTCCCCTTGCCTGTGGAACATTGTCTGGTCCTAGCTGTGGTTCCCATTG
3830608	0.00925342	0.000697512	1.26179	up	C4orf49	84709	Homo sapiens chromosome 4 open reading frame 49 (C4orf49), mRNA.				chr4	140407193	140407242	AAGCCAGTGTTGGCTCTGAGGCTGCTTCGGCTCAAGGCTAATCTCCAGCC
5090754	2.5357e-05	3.1431e-07	1.53566	down	KIAA0101	9768	Homo sapiens KIAA0101 (KIAA0101), transcript variant 1, mRNA.				chr15	64669038	64669087	AGGAGGGAACCCCGTTTGCGTGCGCCCAACTCCCAAGTGGCAAAAAGGAA
2810482	0.0116946	0.000952148	1.32458	up	AHNAK	79026	Homo sapiens AHNAK nucleoprotein (AHNAK), transcript variant 1, mRNA.	GO:0007399	GO:0005634	GO:0005515|GO:0005515	chr11	62301545	62302522	GACCTGGACCCGTGAAGTCTTCAGCTCCTGCAGCTCTGAAGTGGTTCTGA
1190670	0.000357293	9.48214e-06	1.42881	up	SPAG4	6676	Homo sapiens sperm associated antigen 4 (SPAG4), mRNA.	GO:0007283	GO:0005737|GO:0005856|GO:0005929|GO:0016020|GO:0016021|GO:0019861	GO:0005198	chr20	33670934	33670983	ATTGCTGGGCTTTTGAAGGCGACCAAGGCCAGGTGGTGATCCAACTGCCG
4610047	0.00068718	2.22411e-05	1.39904	down	RANBP1	5902	Homo sapiens RAN binding protein 1 (RANBP1), mRNA.	GO:0046907|GO:0007051|GO:0007165|GO:0046604|GO:0046907	GO:0005634|GO:0005737|GO:0005813	GO:0005092|GO:0005096|GO:0005515|GO:0008536	chr22	18494499	18494548	CCGAAAAAGTGGCGGAAAAGCTAGAAGCTCTCTCGGTGAAGGAGGAGACC
60437	0.0201597	0.00197667	1.2405	up	PLOD1	5351	Homo sapiens procollagen-lysine 1, 2-oxoglutarate 5-dioxygenase 1 (PLOD1), mRNA.	GO:0001666|GO:0006464|GO:0008544|GO:0008544|GO:0019538|GO:0046947|GO:0055114	GO:0005783|GO:0016020|GO:0030867	GO:0016702|GO:0005506|GO:0008475|GO:0016491|GO:0016702|GO:0031418|GO:0042803|GO:0046872	chr1	11958106	11958155	CCTGTCCTGGATGCCTCTGAAGAGAGGGACAGACCGTCAGAAACTGGAGA
1260440	0.0306798	0.00354773	1.21271	down	PRKAB1	5564	Homo sapiens protein kinase, AMP-activated, beta 1 non-catalytic subunit (PRKAB1), mRNA.	GO:0005975|GO:0006633|GO:0007165	GO:0005634|GO:0005737	GO:0004553|GO:0005515	chr12	118603591	118603640	GTCGCCACAGATGTACCCACTAGCCCAGGTTGCTGTGAGTCAGCGGAAGC
5810176	0.0229447	0.00236054	1.28088	up	RASSF5	83593	Homo sapiens Ras association (RalGDS/AF-6) domain family member 5 (RASSF5), transcript variant 2, mRNA.	GO:0006915|GO:0007242|GO:0045786	GO:0005737|GO:0005874	GO:0005515|GO:0005515|GO:0005515|GO:0005515|GO:0008270|GO:0019992|GO:0046872	chr1	204828832	204828881	GCTCCTGCTGCAACCGCTGTGAATGCTGCTGAGAACCTCCCTCTATGGGG
2490364	0.000359943	9.65613e-06	1.44503	up	LUM	4060	Homo sapiens lumican (LUM), mRNA.	GO:0007601|GO:0030199	GO:0005576|GO:0005578|GO:0005583	GO:0005201|GO:0005518	chr12	91497982	91498031	GCGTTTGGATGGCAATCGCATCTCAGAAACCAGTCTTCCACCGGATATGT
7320551	6.39402e-05	1.05675e-06	1.49035	down	LYN	4067	Homo sapiens v-yes-1 Yamaguchi sarcoma viral related oncogene homolog (LYN), mRNA.	GO:0006468|GO:0007165|GO:0007242|GO:0008284|GO:0009725|GO:0018108|GO:0030218|GO:0042531|GO:0044419|GO:0046777	GO:0005634|GO:0005737|GO:0005794|GO:0005886|GO:0005886|GO:0045121	GO:0000166|GO:0004713|GO:0004715|GO:0004716|GO:0005515|GO:0005515|GO:0005515|GO:0005515|GO:0005524|GO:0016740	chr8	57085442	57085491	CCTCAGCAGCTGGTAATCTTGCTCTGCTTGACAACATCTGAGTGCAGCCG
1770646	5.2104e-05	7.96262e-07	1.52859	down	EXO1	9156	Homo sapiens exonuclease 1 (EXO1), transcript variant 1, mRNA.	GO:0006298|GO:0006298|GO:0006298|GO:0006298|GO:0006310|GO:0006955|GO:0007126|GO:0002455|GO:0006281|GO:0016446|GO:0045190|GO:0002455|GO:0006281|GO:0016446|GO:0045190	GO:0005634|GO:0005634	GO:0003677|GO:0004519|GO:0004523|GO:0005515|GO:0005515|GO:0005515|GO:0005515|GO:0005515|GO:0005515|GO:0005515|GO:0005515|GO:0005515|GO:0005515|GO:0005515|GO:0016787|GO:0045145|GO:0048256|GO:0048256|GO:0051908|GO:0051908|GO:0004527|GO:0043566|GO:0004527|GO:0043566	chr1	240119417	240119466	GAAACCCCTGTCCCCAGTCAGAGATAACATCCAACTAACTCCAGAAGCGG
830653	0.0473031	0.00645475	1.2535	down	GDI1	2664	Homo sapiens GDP dissociation inhibitor 1 (GDI1), mRNA.	GO:0007165|GO:0015031|GO:0043087	GO:0005737	GO:0005093|GO:0005096|GO:0005515	chrX	153324835	153324884	AGTGAGCCAAGCAGAAGGAGGTGGAAAACGGACCCAAACCCCAGTGTGCC
4830634	2.58061e-08	3.97319e-11	2.00243	down	CDCA8	55143	Homo sapiens cell division cycle associated 8 (CDCA8), mRNA.	GO:0007049|GO:0007067|GO:0051301	GO:0000775|GO:0005634|GO:0005694|GO:0005737|GO:0043234	GO:0005515|GO:0005515	chr1	37947578	37947627	TGTGACTTGCTTGGTGGCCTCATTCCATGTGTGCCTGTGCCTGGGGCATG
4280041	0.0127246	0.0010635	1.45542	up	SSR2	6746	Homo sapiens signal sequence receptor, beta (translocon-associated protein beta) (SSR2), mRNA.	GO:0006613	GO:0005783|GO:0005789|GO:0016020|GO:0016021	GO:0005048	chr1	155981602	155981651	GGGAGGAATCCTGGCTCAGCGGGAGTTTGACAGGCGATTCTCCCCTCATT
1430647	0.0448259	0.00592439	1.22947	up	TAX1BP3	30851	Homo sapiens Tax1 (human T-cell leukemia virus type I) binding protein 3 (TAX1BP3), mRNA.	GO:0007266|GO:0030178	GO:0005634|GO:0005737	GO:0005515|GO:0005515	chr17	3566449	3566498	GGGTGCTGGCCTCCCCAGGGTTTGCCTTCTTACGGATTTAGACGAGGTTC
4220278	0.000616367	1.92668e-05	1.61514	up	TROVE2	6738	Homo sapiens TROVE domain family, member 2 (TROVE2), transcript variant 3, mRNA.	GO:0006096|GO:0006383	GO:0005634|GO:0005737|GO:0030529|GO:0030529|GO:0005634|GO:0005737|GO:0030529|GO:0005634|GO:0005737|GO:0030529|GO:0005634|GO:0005737|GO:0030529|GO:0005634|GO:0005737|GO:0030529	GO:0003723|GO:0004618|GO:0003723|GO:0003723|GO:0003723|GO:0003723|GO:0003723|GO:0005515	chr1	191295419	191295468	TTGCTGTGGCTGTCGCTGCCCGTCAGGCTGCCTTCTTTTGTCGTTTCCCA
5890349	1.06847e-05	9.88644e-08	1.68859	down	STAU1	6780	Homo sapiens staufen, RNA binding protein, homolog 1 (Drosophila) (STAU1), transcript variant T1, mRNA.	GO:0008298	GO:0005622|GO:0005791|GO:0005875|GO:0030529|GO:0005622|GO:0005622|GO:0005622|GO:0005622	GO:0003725|GO:0005515|GO:0005515|GO:0005515|GO:0003725|GO:0003725|GO:0003725|GO:0003725	chr20	47730151	47730200	GCTCTGCGTGTGGTCCGTATGGAAAGCCTGGTAGCCCTGCGAGTTAAGTA
5720520	0.00402363	0.000232321	1.33664	down	SNHG6	641638	Homo sapiens small nucleolar RNA host gene 6 (non-protein coding) (SNHG6), non-coding RNA.				chr8	68000261	68000310	AGGGAGGAAGAAGCGCGAAGAGCCGTTAGTCATGCCGGTGTGGTGGCGGC
2940164	0.00737458	0.00051565	1.3336	down	PKMYT1	9088	Homo sapiens protein kinase, membrane associated tyrosine/threonine 1 (PKMYT1), transcript variant 2, mRNA.	GO:0000079|GO:0006468|GO:0007049|GO:0007088|GO:0006468	GO:0000139|GO:0005624|GO:0005654|GO:0005783|GO:0005789|GO:0005794|GO:0016020	GO:0000166|GO:0004674|GO:0005515|GO:0005524|GO:0016740|GO:0000166|GO:0004674|GO:0005524|GO:0016740	chr16	3024002	3024051	GTTTGCTCCTGGACAGCAGCCTCTCCAGCAACTGGGATGACGACAGCCTA
6220379	0.0427795	0.00555649	1.21238	down	PRELID1	27166	Homo sapiens PRELI domain containing 1 (PRELID1), mRNA.	GO:0006955|GO:0007275	GO:0005739		chr5	176666340	176666389	TCATGTCTGAGCCAGGTCTGCTTATTCTCCCATTGGGCAGCTGAGGACCG
4280692	0.0167782	0.00153717	1.26455	down	PARP1	142	Homo sapiens poly (ADP-ribose) polymerase family, member 1 (PARP1), mRNA.	GO:0000723|GO:0006259|GO:0006284|GO:0040009|GO:0006281|GO:0006366|GO:0006471	GO:0005634|GO:0005634|GO:0005634|GO:0005622|GO:0005634|GO:0005635|GO:0005730|GO:0005730	GO:0003677|GO:0008270|GO:0003677|GO:0005515|GO:0008270|GO:0003677|GO:0008270|GO:0003677|GO:0003950|GO:0008270|GO:0016757|GO:0042802|GO:0046872|GO:0047485|GO:0051287	chr1	224615431	224615480	ACCAAAGCTTCGTTAGAATGTCTGCCTTACTGGTTTCCCCAGGGAAGGAA
6180253	4.15744e-05	5.99017e-07	1.6093	up	CDC42EP2	10435	Homo sapiens CDC42 effector protein (Rho GTPase binding) 2 (CDC42EP2), mRNA.	GO:0007015|GO:0008360|GO:0030838|GO:0031274|GO:0031334	GO:0005737|GO:0005856|GO:0005886|GO:0012505	GO:0001515|GO:0005100|GO:0005515|GO:0017049	chr11	64846266	64846315	ACGTCGTACCTGACGCTGAGCCTGTCATGAGAATGCAACAGGAGCAAACC
6370068	0.035554	0.00432042	1.25819	up	GNL1	2794	Homo sapiens guanine nucleotide binding protein-like 1 (GNL1), mRNA.	GO:0002456|GO:0006974|GO:0007165	GO:0005615|GO:0005622	GO:0000166|GO:0005198|GO:0005525	chr6	30621787	30621836	TGAGTGCTGAGTTCCTCGCCCAGCGCCATCTTCCCTCCCAGTATCTTTGC
5310605	4.0924e-07	1.51747e-09	1.81428	down	CCNY	219771	Homo sapiens cyclin Y (CCNY), transcript variant 1, mRNA.		GO:0005634		chr10	35899004	35899053	GGCATGTGCCTGGAACTACCGAGTAGGAGCCATTTCTTTGTACCCCTGCC
3060703	0.0139014	0.00118926	1.25543	down	LOC81691	81691	Homo sapiens exonuclease NEF-sp (LOC81691), mRNA.				chr16	20768299	20768348	CGTGAGTCGGCCTGCCATGTTTCCATGTGCCATTTCTTACCCCTTGTAGG
870338	0.0287738	0.00324707	1.51631	down	EGR1	1958	Homo sapiens early growth response 1 (EGR1), mRNA.	GO:0000122|GO:0006355|GO:0030217|GO:0045941	GO:0005622|GO:0005634	GO:0003700|GO:0008270|GO:0046872	chr5	137804532	137804581	CGTCTTGGTGCCTTTTGTGTGATGCGCCTTGCTGATGGCTTGACATGTGC
3780148	0.0289226	0.00327559	1.25011	down	C7orf26	79034	Homo sapiens chromosome 7 open reading frame 26 (C7orf26), mRNA.				chr7	6614639	6614688	CGGGTGCAAGCCCGTGTGTCTGGCCTCTTTCCTCGTGAAGACGATGTGTC
2640088	0.00121701	4.72544e-05	3.59846	up	ALDOA	226	Homo sapiens aldolase A, fructose-bisphosphate (ALDOA), transcript variant 2, mRNA.	GO:0006000|GO:0006096|GO:0006941|GO:0008152	GO:0005634|GO:0005737	GO:0004332|GO:0005515|GO:0016829	chr16	29984647	29984696	AAGGGGTCCTGGTGACGAGTCCCGCGTTCTCTCCTTGAATCCACTCGCCA
4780048	0.0453317	0.00604647	1.20834	down	FBXO7	25793	Homo sapiens F-box protein 7 (FBXO7), transcript variant 2, mRNA.	GO:0006511|GO:0031647	GO:0000151	GO:0004842|GO:0005515	chr22	31224431	31224480	TTGCCAGGGCGAGGCGGCCCCAATGACAGATTTCCCTTTAGACCCAGCAG
1580520	0.0294806	0.00335416	1.23329	up	PTPN13	5783	Homo sapiens protein tyrosine phosphatase, non-receptor type 13 (APO-1/CD95 (Fas)-associated phosphatase) (PTPN13), transcript variant 3, mRNA.	GO:0006470	GO:0005737|GO:0005856	GO:0004725|GO:0005198|GO:0005515|GO:0005515|GO:0005515|GO:0016787	chr4	87949947	87949996	CCAGAGAGGTGCGCCATATTTCTCATCTGAATTTCACTGCCTGGCCAGAC
7380347	0.00677596	0.000459794	1.29511	down	TRAIP	10293	Homo sapiens TRAF interacting protein (TRAIP), mRNA.				chr3	49866597	49866646	TCGGGACCAGCCTGAGGTGTAAGGGCAGACAAACAGGTGAGGGTGAGTGT
7320402	0.00693161	0.000472927	1.28705	up	APBB3	10307	Homo sapiens amyloid beta (A4) precursor protein-binding, family B, member 3 (APBB3), transcript variant 2, mRNA.		GO:0005737|GO:0005856|GO:0005737|GO:0005856	GO:0005515|GO:0005515	chr5	139937965	139938014	TTATACGGATGACTGGGAGGCACTGCACCACAACGTAGGACCCTGGCTCC
3610202	8.36811e-05	1.47167e-06	1.6194	up	GALNT10	55568	Homo sapiens UDP-N-acetyl-alpha-D-galactosamine:polypeptide N-acetylgalactosaminyltransferase 10 (GalNAc-T10) (GALNT10), transcript variant 2, mRNA.	GO:0006493	GO:0000139|GO:0005794|GO:0016020|GO:0016021	GO:0004653|GO:0005509|GO:0005529|GO:0016757|GO:0030145	chr5	153779768	153779817	GTTGCTTTAAGAACAAGGCCTTTGGAGGTGGCTAAACTTGCACGCACGTG
4540184	0.0339215	0.00405376	1.21635	down	SYTL4	94121	Homo sapiens synaptotagmin-like 4 (granuphilin-a) (SYTL4), mRNA.	GO:0006810|GO:0006886|GO:0006887	GO:0008021|GO:0016020|GO:0019897	GO:0005215|GO:0005543|GO:0008270|GO:0017137|GO:0042043|GO:0046872	chrX	99816187	99816236	AGGCATAACTTGGGATCCCGGGCTGTAACTTGCTCTTTTGTTTCCCACCC
1450333	0.03237	0.00379119	1.32153	down	AKAP11	11215	Homo sapiens A kinase (PRKA) anchor protein 11 (AKAP11), mRNA.	GO:0007243	GO:0005737|GO:0005813	GO:0008157|GO:0051018	chr13	41795015	41795064	TCCGGTTTTAATATTGCTGGATTTGCTACCTTTGGTTACTTGTGCAGTGT
4850440	0.00213477	0.000101435	1.4085	up	HEATR3	55027	Homo sapiens HEAT repeat containing 3 (HEATR3), mRNA.			GO:0005488	chr16	48693699	48693748	CCACCAAAGATCCTTCCCTTGTGGTAGCAGGAGAAGCTTTGGATGCCCTC
4670592	0.00078927	2.6047e-05	1.44542	up	MYOF	26509	Homo sapiens myoferlin (MYOF), transcript variant 1, mRNA.				chr10	95066644	95066693	GTCATCCAGCAATGAGAGAATCCTGCCTCTGTAGACCAACATCCAGTGTG
2370504	0.038211	0.00476701	1.29792	up	TTPAL	79183	Homo sapiens tocopherol (alpha) transfer protein-like (TTPAL), transcript variant 2, mRNA.	GO:0006810	GO:0005622	GO:0005215	chr20	42552453	42552502	GAGGCTGGATGAAATGTCAGCTAGGGCCATTTTGGCTGCTGAGGCTCTGG
3520382	0.0249642	0.00266828	1.2244	up	CCNT2	905	Homo sapiens cyclin T2 (CCNT2), transcript variant b, mRNA.	GO:0000079|GO:0006350|GO:0006355|GO:0006366|GO:0007049|GO:0044419|GO:0051301	GO:0005634|GO:0005654|GO:0005730|GO:0005737	GO:0005515	chr2	135430382	135430431	TTGGGGTACTTAGGAGCCTCTTTGTAGGGACTGTGCCTAGGTAGCATGTC
3180600	0.00308577	0.000164112	1.31256	down	PNPO	55163	Homo sapiens pyridoxamine 5'-phosphate oxidase (PNPO), mRNA.	GO:0008615|GO:0055114		GO:0004733|GO:0010181|GO:0016491	chr17	43380480	43380529	TATTCCCAGTCCGTCAGGAATTTTGTAGAAGGGCTTCATGTGCTGGTACC
6840156	0.0154027	0.00136519	1.26078	up	GMDS	2762	Homo sapiens GDP-mannose 4,6-dehydratase (GMDS), mRNA.	GO:0005975|GO:0007159|GO:0019673|GO:0042351|GO:0044237|GO:0008152|GO:0019673	GO:0005622|GO:0005737|GO:0005622	GO:0005488|GO:0008446|GO:0016491|GO:0016829|GO:0050662|GO:0003824|GO:0005488|GO:0008446	chr6	1906150	1906199	CCTCCAGGGTTTGGGTCGCTTTGCGTTTGTCGAAGCCTCCTCTGAATGGC
7040711	0.00181412	8.26432e-05	1.3914	down	CKAP2	26586	Homo sapiens cytoskeleton associated protein 2 (CKAP2), mRNA.	GO:0006915|GO:0007049	GO:0005737|GO:0005874		chr13	51948405	51948454	TTATTGACTTCTCATGTTCTAGAGAGTAGGACTTTTATTCCGTGTACCTG
1070762	4.9546e-07	1.99465e-09	1.74991	down	PSRC1	84722	Homo sapiens proline/serine-rich coiled-coil 1 (PSRC1), transcript variant 4, mRNA.	GO:0001578|GO:0007049|GO:0030308|GO:0031116|GO:0043193	GO:0005737|GO:0005819|GO:0030496	GO:0008017	chr1	109822305	109822354	CCTGAATCGCATTCTCTACTGGACTCTGGCCTGCTTGGAGAGGTGGCAGC
5490240	0.000519602	1.5469e-05	1.39471	up	MAP1LC3A	84557	Homo sapiens microtubule-associated protein 1 light chain 3 alpha (MAP1LC3A), transcript variant 2, mRNA.	GO:0000045|GO:0006511|GO:0006914	GO:0005737|GO:0005776|GO:0005776|GO:0005829|GO:0005874|GO:0012505|GO:0031090|GO:0031410	GO:0005515|GO:0005515|GO:0008429	chr20	32611733	32611782	CCCCTCGGTCTCCACGTGGTGTATGGATCTGTGGTCATTGTCCCTCTGCA
6290475	0.0397745	0.00502712	1.2192	down	HECW2	57520	Homo sapiens HECT, C2 and WW domain containing E3 ubiquitin protein ligase 2 (HECW2), mRNA.	GO:0006464|GO:0006511	GO:0005622|GO:0005737	GO:0005515|GO:0016874|GO:0016881	chr2	197064295	197064344	CTGGGACCCTCAAGAGGAATACCACTTATGTTACACTCCTGCACTAAAGG
1780008	0.0198418	0.00193767	1.23061	down	SNORA28	677811	Homo sapiens small nucleolar RNA, H/ACA box 28 (SNORA28), small nucleolar RNA.				chr14	102873996	102874045	GCAAGAAAGTCTAACCTATTCCGGTGTTCTCTCTCCCATGAGACAAGCCG
2370546	1.23669e-05	1.19228e-07	1.56236	down	KIF24	347240	Homo sapiens kinesin family member 24 (KIF24), mRNA.	GO:0007018	GO:0005874|GO:0005875	GO:0000166|GO:0003777|GO:0005524	chr9	34254371	34253141	GCCTATCCCAACTCCACAGTCAGGAAGGCCTACGTCCTTGGTCCACAGAC
1070504	0.00431198	0.000253538	1.63035	up	COPE	11316	Homo sapiens coatomer protein complex, subunit epsilon (COPE), transcript variant 3, mRNA.	GO:0006890|GO:0006890|GO:0006890|GO:0006890|GO:0006891|GO:0015031|GO:0016044|GO:0016192|GO:0048205	GO:0030126|GO:0030126|GO:0000139|GO:0005737|GO:0005794|GO:0005829|GO:0005829|GO:0016020|GO:0030126|GO:0030137|GO:0031410	GO:0005198|GO:0005515|GO:0005198|GO:0005515|GO:0005198|GO:0005515	chr19	19015637	19016409	AAGCTGGACCGCCTGGACCTCGCCCGGAAGGAGCTGAAGAGAATGCAGGA
2970364	0.0496514	0.00690933	1.19836	up	BMPER	168667	Homo sapiens BMP binding endothelial regulator (BMPER), mRNA.	GO:0030514	GO:0005576	GO:0005515	chr7	34193393	34193442	GGAGATTGGTGACCGGCCCTAATGGTGCATGAAAAGCGAGTGATAGGCTG
3990201	0.0222629	0.00226073	1.28412	up	OTUD4	54726	Homo sapiens OTU domain containing 4 (OTUD4), transcript variant 1, mRNA.	GO:0008150	GO:0005575	GO:0003674|GO:0005515	chr4	146275310	146275359	TCCTCTCAAATCTTCAACTCTTGCCCCATGTCTCCTTGGCAGCAGGATGC
5550500	9.29546e-05	1.684e-06	1.79809	up	MXRA7	439921	Homo sapiens matrix-remodelling associated 7 (MXRA7), transcript variant 2, mRNA.		GO:0016020|GO:0016021		chr17	74679957	74680006	TTGAGCTGACCTCTGACCTCACTTCCCTGTAGCAAGTTCCTTAGGTCCTG
380541	0.00393137	0.000224953	1.31056	down	PPPDE2	27351	Homo sapiens PPPDE peptidase domain containing 2 (PPPDE2), mRNA.				chr22	41999281	41999330	GGCACAGTTCCTGACTGGGCGGAAGATTCCTTCTTACATCACAGACCTGC
430189	0.045349	0.00605118	1.20147	up	UPLP	100134938	Homo sapiens uroplakin-like protein (UPLP), mRNA.							CCCAAAGCTTGTGCCAGTCTCTATCAGAAATAAATGCCCCCAAAACCTCA
450424	1.58143e-06	8.96349e-09	1.70947	up	CXCR7	57007	Homo sapiens chemokine (C-X-C motif) receptor 7 (CXCR7), mRNA.	GO:0007165|GO:0007186|GO:0008150|GO:0044419	GO:0005886|GO:0016021	GO:0004872	chr2	237155523	237155572	TCTGTGTGGTGTTTTGTACCGGCACGGGATATGGAACGAAAACTGCTTTG
3400048	0.00218207	0.000104954	1.61854	up	IL11	3589	Homo sapiens interleukin 11 (IL11), mRNA.	GO:0007267|GO:0008284|GO:0030168|GO:0030183|GO:0030219|GO:0033138|GO:0043410|GO:0045444|GO:0045944|GO:0046888|GO:0050731	GO:0005576|GO:0005615	GO:0005125|GO:0005142	chr19	60567986	60568035	GAGCAGGGACTGTCATTCAGGGAGGCTAAGGAGAGAGGCTTGCTTGGGAT
5310278	0.0104513	0.000827116	1.25879	down	PABPC4	8761	Homo sapiens poly(A) binding protein, cytoplasmic 4 (inducible form) (PABPC4), mRNA.	GO:0006396|GO:0006401|GO:0006412|GO:0007596	GO:0005737	GO:0000166|GO:0003723|GO:0000166|GO:0003676|GO:0003723|GO:0000166|GO:0003723|GO:0000166|GO:0003723|GO:0005515|GO:0005515|GO:0005515|GO:0008143|GO:0008266|GO:0017130	chr1	39800037	39800371	CTGCTGCACATGTTAGAGTCCCCCGAGTCTCTCCGCTCCAAGGTGGATGA
7050576	0.0343835	0.00412296	1.21657	down	COMMD7	149951	Homo sapiens COMM domain containing 7 (COMMD7), transcript variant 2, mRNA.	GO:0016481|GO:0032088|GO:0033209	GO:0005575	GO:0005515|GO:0051059	chr20	31290702	31290751	CAGAGCCCCCACGGATTTCTGCACACTCTGGGTCTGTGCTGGTGGAACAT
20653	0.0261871	0.00285065	1.23072	down	SIX4	51804	Homo sapiens SIX homeobox 4 (SIX4), mRNA.	GO:0006355|GO:0007275|GO:0007519|GO:0042472|GO:0045941|GO:0048538|GO:0048704|GO:0051451	GO:0005634	GO:0003700|GO:0043565	chr14	61176419	61176468	ACAGAGTCTTTACTGCACTGTTAGGTGATGGCACACAGAGCATGTCCCAG
20403	0.0316208	0.00368913	1.27053	down	TOR1AIP1	26092	Homo sapiens torsin A interacting protein 1 (TOR1AIP1), mRNA.		GO:0005635|GO:0005634|GO:0005637|GO:0016020|GO:0016021	GO:0005515	chr1	178155166	178155215	TCCGCGCATCCACTTGTTGCAGTCCAAGTCCTCTAGTGCAACGCCATAGC
6900079	1.57681e-05	1.70393e-07	1.69009	down	PCNA	5111	Homo sapiens proliferating cell nuclear antigen (PCNA), transcript variant 2, mRNA.	GO:0006275|GO:0006281|GO:0006287|GO:0006297|GO:0006886|GO:0008283|GO:0048015	GO:0000307|GO:0005634|GO:0005652|GO:0005654|GO:0005654|GO:0005663|GO:0043626	GO:0003677|GO:0005515|GO:0005515|GO:0005515|GO:0030337|GO:0032405	chr20	5095941	5095990	GCGGATATGGGACACTTAAAATACTACTTGGCTCCCAAGATCGAGGATGA
7050021	7.51527e-09	7.13555e-12	2.62712	down	PRKAR1A	5573	Homo sapiens protein kinase, cAMP-dependent, regulatory, type I, alpha (tissue specific extinguisher 1) (PRKAR1A), transcript variant 1, mRNA.	GO:0001707|GO:0007165|GO:0001707|GO:0001932|GO:0006357|GO:0009755	GO:0031594|GO:0005952|GO:0031594	GO:0005515|GO:0008603|GO:0016301|GO:0000166|GO:0005515|GO:0005515|GO:0005515|GO:0008603|GO:0030552	chr17	64040350	64040399	CTGCTCTAGAAAGTATAGATGGCCAAAGGACCGTTTTGTATTGCTTCCTG
5690280	0.000360876	9.73015e-06	1.45771	down	FXR2	9513	Homo sapiens fragile X mental retardation, autosomal homolog 2 (FXR2), mRNA.		GO:0005737|GO:0022625	GO:0003723|GO:0005515|GO:0005515	chr17	7435459	7435508	TGCTATCCCTCCTCCCATCCTGTACCCCCCATTTCTGGGGCCTCATCACT
2030630	0.000838852	2.87011e-05	1.40876	down	SKA1	220134	Homo sapiens spindle and kinetochore associated complex subunit 1 (SKA1), transcript variant 2, mRNA.	GO:0007049|GO:0007067|GO:0051301	GO:0000777|GO:0005819		chr18	46174187	46174236	GATGGGCACCTGGATAACTCAGGATGGGGGCTGCTCACAAAGACCACATC
1570743	0.0221438	0.00224277	1.24889	down	METTL9	51108	Homo sapiens methyltransferase like 9 (METTL9), transcript variant 2, mRNA.				chr16	21575541	21575590	AGAAGTCATCAGATCAACACATTCACTCCAACACCTGGGTATAAAGGCGA
5560246	0.0234778	0.00245125	1.29676	up	TPM1	7168	Homo sapiens tropomyosin 1 (alpha) (TPM1), transcript variant 3, mRNA.	GO:0001701|GO:0006928|GO:0006937|GO:0008016|GO:0009790	GO:0005737|GO:0005856|GO:0005862|GO:0030016|GO:0030017|GO:0031941	GO:0003779|GO:0008307	chr15	61141526	61141873	GGAGGCTGAGACTCGGGCTGAGTTTGCGGAGAGGTCAGTAACTAAATTGG
4250372	0.015153	0.00133196	1.27466	up	KLHDC3	116138	Homo sapiens kelch domain containing 3 (KLHDC3), mRNA.	GO:0007126|GO:0007131	GO:0000790|GO:0005737	GO:0003682|GO:0005515	chr6	42988934	42988983	GTGGGGACCAGCAGATAAATCCCACCCTTCCTTGAGCTGTCGCTGTACTC
1400341	0.0222128	0.00225328	1.24089	up	ACY1	95	Homo sapiens aminoacylase 1 (ACY1), mRNA.	GO:0006508|GO:0006520	GO:0005737|GO:0005829	GO:0004046|GO:0008237|GO:0008270|GO:0016787|GO:0046872|GO:0046983	chr3	51997630	51997841	GGCAGCTTTTAGCCGGGTCTGCAAGGATATGAACCTCACTCTGGAGCCTG
130368	2.54554e-10	1.07873e-13	2.51049	down	PRKAR1A	5573	Homo sapiens protein kinase, cAMP-dependent, regulatory, type I, alpha (tissue specific extinguisher 1) (PRKAR1A), transcript variant 3, mRNA.	GO:0001707|GO:0007165|GO:0001707|GO:0001932|GO:0006357|GO:0009755	GO:0031594|GO:0005952|GO:0031594	GO:0005515|GO:0008603|GO:0016301|GO:0000166|GO:0005515|GO:0005515|GO:0005515|GO:0008603|GO:0030552	chr17	64039676	64039725	GTGCAACTAACTGACTCTGTTATTGATCCCTTCTCCTGCCCTTTCCCAGG
4570255	1.98959e-06	1.26417e-08	1.67611	down	LEF1	51176	Homo sapiens lymphoid enhancer-binding factor 1 (LEF1), mRNA.	GO:0006350|GO:0006355|GO:0016055|GO:0000122|GO:0001756|GO:0001890|GO:0006355|GO:0021542|GO:0030111|GO:0030326|GO:0030879|GO:0042475|GO:0045843|GO:0045944|GO:0048341|GO:0048468	GO:0005634|GO:0005730|GO:0005737|GO:0005634|GO:0005667|GO:0005737	GO:0005515|GO:0005515|GO:0008301|GO:0043565|GO:0003677|GO:0003682|GO:0003705|GO:0016563	chr4	109188515	109188564	GTAATAGCCAAACCCCACTCTGTTGGTAGCAATTGGCAGCCCTATTTCAG
2810601	0.000357394	9.50374e-06	1.43826	down	LEF1	51176	Homo sapiens lymphoid enhancer-binding factor 1 (LEF1), mRNA.	GO:0006350|GO:0006355|GO:0016055|GO:0000122|GO:0001756|GO:0001890|GO:0006355|GO:0021542|GO:0030111|GO:0030326|GO:0030879|GO:0042475|GO:0045843|GO:0045944|GO:0048341|GO:0048468	GO:0005634|GO:0005730|GO:0005737|GO:0005634|GO:0005667|GO:0005737	GO:0005515|GO:0005515|GO:0008301|GO:0043565|GO:0003677|GO:0003682|GO:0003705|GO:0016563	chr4	109188592	109188641	GTGGCTTCTCTGTGAATTGCCTGTAACACATAGTGGCTTCTCCGCCCTTG
7650333	0.00518587	0.000321129	1.30037	up	PSAP	5660	Homo sapiens prosaposin (PSAP), transcript variant 2, mRNA.	GO:0006629|GO:0006665|GO:0006629|GO:0006687|GO:0006869|GO:0007040	GO:0005764|GO:0005615|GO:0005764|GO:0005794|GO:0016021	GO:0008047|GO:0008289	chr10	73576124	73576173	TGGTTGCCAGGAGACAGCAAGCAAAGCCAGCAGGACATGAAGTTGCTATT
940722	0.0301827	0.0034738	1.31151	down	CTNNAL1	8727	Homo sapiens catenin (cadherin-associated protein), alpha-like 1 (CTNNAL1), mRNA.	GO:0007155|GO:0007155	GO:0005737|GO:0005886|GO:0015629|GO:0015629	GO:0005198|GO:0045296|GO:0005198|GO:0045296	chr9	110745839	110745888	CTCCTGGAAATAAACAAGCTAATTCCTCTATGCCACCAGCTCCAGACAGT
7150678	0.0263078	0.00286719	1.2425	down	RAB8A	4218	Homo sapiens RAB8A, member RAS oncogene family (RAB8A), mRNA.	GO:0007264|GO:0015031		GO:0000166|GO:0005515|GO:0005525	chr19	16105121	16105170	GCTGACCGCACAGCAGTCTGGCTTGATTTTCAGCCGTCATCATTGGGTTC
4810129	0.0441807	0.00581805	1.32226	up	BRMS1	25855	Homo sapiens breast cancer metastasis suppressor 1 (BRMS1), transcript variant 1, mRNA.	GO:0008150|GO:0045786|GO:0009987	GO:0005575	GO:0003674|GO:0005515	chr11	66105279	66105328	ACCCTCAGAGCAGCTGGCACTGCACCCAGGATTCTCGTCTTCCTCCTGCA
840292	0.0415549	0.00532699	1.25793	down	RBM15	64783	Homo sapiens RNA binding motif protein 15 (RBM15), mRNA.	GO:0045449	GO:0005634	GO:0000166|GO:0003723	chr1	110690727	110690776	GGCTCACACAGCTTAAGAGTAGCTGTCTCTCAAACGTGCGCTCACAGTTG
5960674	0.00170591	7.51836e-05	1.64102	up	PRDX2	7001	Homo sapiens peroxiredoxin 2 (PRDX2), nuclear gene encoding mitochondrial protein, transcript variant 3, mRNA.	GO:0045454|GO:0045454|GO:0006916|GO:0006979|GO:0006979|GO:0042981|GO:0045454|GO:0055114	GO:0005737	GO:0016209|GO:0016491|GO:0008379|GO:0016491	chr19	12911869	12912007	GCGCCTTCAAAGAGGTGAAGCTGTCGGACTACAAAGGGAAGTACGTGGTC
380242	0.0468703	0.00637584	1.24605	up	G6PC3	92579	Homo sapiens glucose 6 phosphatase, catalytic, 3 (G6PC3), mRNA.	GO:0006094|GO:0015760	GO:0005783|GO:0005789|GO:0016020|GO:0016021	GO:0004346|GO:0016787	chr17	39508892	39508941	GCACATGTTCAGTGCCCAGGAAGCACCGCCCATCCACTCTTCCTGACTTC
5960278	9.71205e-05	1.80092e-06	1.60622	down	WBP11	51729	Homo sapiens WW domain binding protein 11 (WBP11), mRNA.	GO:0006364|GO:0006397|GO:0008380	GO:0005634|GO:0005737	GO:0003697|GO:0005515	chr12	14939737	14939786	GCTAACATCCATTCCCTTTCATACCACCATTTTCACCCTGTTTCTTCCCC
1410706	0.00666609	0.000449513	1.3328	up	IKBIP	121457	Homo sapiens IKBKB interacting protein (IKBIP), transcript variant 2, mRNA.				chr12	99038475	99038524	CTGGTGAAGAAGCTGCCCTGGGCTTGTCGTCCTAGGGTCTCCAGACATGT
6620370	0.0279477	0.00311468	1.24481	up	IKBIP	121457	Homo sapiens IKBKB interacting protein (IKBIP), transcript variant 2, mRNA.				chr12	99038431	99038480	ACATGTCTGAGGTGAAGAGCCGGAAGAAGTCGGGGCCCAAGGGAGCCCCT
270703	0.000397128	1.08338e-05	1.43109	down	TMEFF2	23671	Homo sapiens transmembrane protein with EGF-like and two follistatin-like domains 2 (TMEFF2), mRNA.		GO:0005576|GO:0016020|GO:0016021|GO:0016021	GO:0003674	chr2	192814990	192815039	CTAAAGGGAGCATGTTTCACAGTGGCTGGACTACCGAGAGCTTGGACTAC
630356	0.0449423	0.0059493	1.2074	up	DAZAP2	9802	Homo sapiens DAZ associated protein 2 (DAZAP2), mRNA.			GO:0005515	chr12	49923457	49923506	AGTGTCTGATGCGGCCACTCATTCGGCTCCCCAGAATTCCTAGACTGGGT
1710204	0.00423037	0.000247844	1.29904	down	ADAT1	23536	Homo sapiens adenosine deaminase, tRNA-specific 1 (ADAT1), mRNA.	GO:0006396|GO:0008033		GO:0003723|GO:0008251|GO:0008270|GO:0016787|GO:0046872	chr16	75633443	75633492	GGGACTGCCGGTGGCCATCTTTTCCTACTACCTAGAGAAAGCCAGCAAAG
3390379	0.0441202	0.00580542	1.241	up	ACCS	84680	Homo sapiens 1-aminocyclopropane-1-carboxylate synthase homolog (Arabidopsis)(non-functional) (ACCS), transcript variant 1, mRNA.	GO:0009058		GO:0003824|GO:0016769|GO:0016847|GO:0030170|GO:0034100|GO:0042803	chr11	44105488	44105537	TCGCTGTAGCAGTGGGAAACTCCTTAAGCTGTGGTTCAGCCTGGGCCCTC
3310097	3.82822e-05	5.33331e-07	1.54381	up	TSPAN10	83882	Homo sapiens tetraspanin 10 (TSPAN10), mRNA.		GO:0016020|GO:0016021		chr17	77226086	77226135	AAGGTCCAGGCCTCTCCCTCCCGAGTGCATTTTTGGGGAGATAGTAAATG
6400176	0.0204639	0.00202385	1.25679	up	IRF7	3665	Homo sapiens interferon regulatory factor 7 (IRF7), transcript variant b, mRNA.	GO:0000122|GO:0006350|GO:0006355|GO:0009615|GO:0016064|GO:0045351	GO:0005634|GO:0005737	GO:0003700|GO:0003704	chr11	612640	612689	TGACGACATCGAGTGCTTCCTTATGGAGCTGGAGCAGCCCGCCTAGAACC
1010521	0.0453697	0.00606193	1.21052	down	SP4	6671	Homo sapiens Sp4 transcription factor (SP4), mRNA.	GO:0006350|GO:0006357|GO:0008016	GO:0005622|GO:0005634	GO:0003677|GO:0003702|GO:0003713|GO:0008270|GO:0046872	chr7	21518420	21518469	ATGCATGTCACTAAGTTGTCATCCCACATAAATTGATGTGCAGCATAGGG
4280524	0.0186951	0.00179049	1.23323	up	LEPREL1	55214	Homo sapiens leprecan-like 1 (LEPREL1), mRNA.	GO:0019538|GO:0055114	GO:0005783|GO:0005794	GO:0005506|GO:0016491|GO:0016702|GO:0016706|GO:0019797|GO:0031418|GO:0046872	chr3	191157361	191157410	CCATGGCCAGGTTGCCTAGGAGTGGGGTCCACTGATGAAAAGAGGTGTTT
1450309	0.0121711	0.00100577	1.28002	down	FLJ20699	55020	Homo sapiens hypothetical protein FLJ20699 (FLJ20699), mRNA.				chr22	45068302	45068351	CCTCTGTCTCCTGCTTCCTCACTGAACGCCTGCTGAATGTGCCGCTGACT
6200242	0.0158462	0.00142446	1.25041	down	NLK	51701	Homo sapiens nemo-like kinase (NLK), mRNA.	GO:0006355|GO:0007243|GO:0030178|GO:0046777	GO:0005634|GO:0005737	GO:0000166|GO:0000287|GO:0004674|GO:0004707|GO:0005515|GO:0005524|GO:0016740	chr17	23547329	23547378	TGAGGCTCCTGAGAATCAACCCAACTGAAGCATTTCAATTCACTTGAATG
2190753	0.043109	0.00562396	1.27583	up	C11orf17	56672	Homo sapiens chromosome 11 open reading frame 17 (C11orf17), transcript variant 1, mRNA.				chr11	8897700	8897749	AGTGCTGACTGGGTCAGCCTTCCGGGAACTGGAGTCTGTCTCTTTCAGTG
6590224	0.0121518	0.0010016	1.29597	up	WFS1	7466	Homo sapiens Wolfram syndrome 1 (wolframin) (WFS1), mRNA.	GO:0001822|GO:0003091|GO:0006983|GO:0006983|GO:0007601|GO:0007601|GO:0007605|GO:0022417|GO:0032469|GO:0042593|GO:0043069|GO:0043524|GO:0043524|GO:0050877|GO:0051247|GO:0051928|GO:0055074	GO:0005783|GO:0005789|GO:0016020|GO:0016021|GO:0030176|GO:0030176|GO:0030425	GO:0051117	chr4	6355789	6355838	GGAGGTCCCTGCCAGTGTTTAGAAGAGCCTGACTGTGTTCAGTGCCTTGG
4830373	0.000201987	4.42964e-06	1.53649	down	GMNN	51053	Homo sapiens geminin, DNA replication inhibitor (GMNN), mRNA.	GO:0008156|GO:0009887|GO:0045786	GO:0005634|GO:0005654	GO:0005515	chr6	24785941	24785990	GAGGATTCTCTAGTGGAAGACTCAGAAATTGGCACGTGTGCTGAAGGAAC
1070133	0.00760781	0.000540019	1.37546	down	CLDN12	9069	Homo sapiens claudin 12 (CLDN12), mRNA.	GO:0016338	GO:0005923|GO:0005886|GO:0005923|GO:0016021|GO:0030054	GO:0005198|GO:0005198|GO:0042802	chr7	89882913	89882962	AGTCACTTTTGAGCCCTCATCAAGCTCTCATTGTGATGGGAGGGATACCT
1070376	0.0388522	0.00487144	1.22661	down	CEP164	22897	Homo sapiens centrosomal protein 164kDa (CEP164), mRNA.			GO:0005515	chr11	116789027	116789076	CAGCAAGGGGTCTTTGTGCAGTTGGAGATGCTGCCGTTGTGGCAGAGCGT
2100368	0.0460833	0.00620788	1.31587	down	GOLT1B	51026	Homo sapiens golgi transport 1 homolog B (S. cerevisiae) (GOLT1B), mRNA.	GO:0015031|GO:0016192|GO:0043123	GO:0000139|GO:0005783|GO:0005794|GO:0016020|GO:0016021	GO:0004871	chr12	21561883	21561932	GGGTTTGATAATCTCCCAGTCCTTAGTAAAGATTGAGAGAGGCTGGAGCA
2060193	0.032385	0.00379467	1.25565	up	ATP13A1	57130	Homo sapiens ATPase type 13A1 (ATP13A1), mRNA.	GO:0006810|GO:0006812|GO:0008152	GO:0016020|GO:0016021	GO:0000166|GO:0000287|GO:0005524|GO:0015662|GO:0016787|GO:0016820|GO:0016887	chr19	19617021	19617070	GGCCAGCAGAACCAGCCCCAAGCCAGCACCTTTGGTAAATAAAGCAGCAT
4560019	0.0395092	0.00498103	1.24166	down	MBOAT2	129642	Homo sapiens membrane bound O-acyltransferase domain containing 2 (MBOAT2), mRNA.		GO:0016020|GO:0016021	GO:0008415|GO:0016740	chr2	8997388	8997437	TCCCATGCATTGAAATTATGTTGGCTGAGCATGGTGGCTCACACCTGTAA
4260368	8.13325e-09	8.18582e-12	2.15907	down	UBE2C	11065	Homo sapiens ubiquitin-conjugating enzyme E2C (UBE2C), transcript variant 3, mRNA.	GO:0043687|GO:0051246|GO:0006511|GO:0043687|GO:0051246|GO:0043687|GO:0051246|GO:0006511|GO:0043687|GO:0051246|GO:0006511|GO:0007049|GO:0007051|GO:0007067|GO:0008054|GO:0016567|GO:0031145|GO:0031536|GO:0043687|GO:0048015|GO:0051246|GO:0051301|GO:0051436|GO:0051436|GO:0051437	GO:0005654|GO:0005654|GO:0005654|GO:0005829|GO:0005829|GO:0005829|GO:0005829|GO:0005829	GO:0019787|GO:0016874|GO:0019787|GO:0019787|GO:0016874|GO:0019787|GO:0004842|GO:0016874	chr20	43877911	43878755	GATAGTCCCTTGAACACACATGCTGCCGAGCTCTGGAAAAACCCCACAGC
6040537	0.0409175	0.00522794	1.31329	up	DIABLO	56616	Homo sapiens diablo homolog (Drosophila) (DIABLO), nuclear gene encoding mitochondrial protein, transcript variant 2, mRNA.	GO:0006915|GO:0006917|GO:0008625|GO:0008635	GO:0005739|GO:0005829	GO:0005515	chr12	121275170	121275219	CAGCCCCTGCAAGTAAATCCAAGAGCCTGTTACAGATTGGCGGTCGTGCC
5270519	3.17034e-06	2.14961e-08	1.68511	up	ALPK2	115701	Homo sapiens alpha-kinase 2 (ALPK2), mRNA.	GO:0006468		GO:0004674|GO:0005524|GO:0016301|GO:0016740	chr18	56148547	56148596	CCACTGGTGTCTAATACGCTATTGTTGCCGGAGGTGGGTTCTGTGACGTG
270196	0.000359943	9.63974e-06	1.42422	down	OBFC2B	79035	Homo sapiens oligonucleotide/oligosaccharide-binding fold containing 2B (OBFC2B), mRNA.				chr12	54909410	54909459	TCTCATACTCCCTCATTGTCCAGCTGAACTACCTGTCCCCTGGGAGTCAG
3870594	0.0169548	0.00156274	1.28673	up	IFI16	3428	Homo sapiens interferon, gamma-inducible protein 16 (IFI16), mRNA.	GO:0006350|GO:0006355|GO:0008283|GO:0009615|GO:0030099|GO:0030224|GO:0042771	GO:0005634|GO:0005634|GO:0005634|GO:0005654|GO:0005730|GO:0005730|GO:0005730|GO:0005737	GO:0003677|GO:0003690|GO:0005515|GO:0016564	chr1	157288195	157288244	CCTTTCACACTTGTGGCTGATGTGAATGCTGACCGAAACATGGAGATCCC
5390494	0.0451252	0.00600432	1.2872	up	EIF4B	1975	Homo sapiens eukaryotic translation initiation factor 4B (EIF4B), mRNA.	GO:0006412|GO:0006446	GO:0005829|GO:0005829|GO:0016281	GO:0000166|GO:0003723|GO:0003743	chr12	51721753	51721802	GATTAGGCCCTGTTCAGCCATGCAGGGGTGTTGGTTTATGCGTGCTGCAG
2510674	0.00481073	0.000292293	1.36537	down	SETD1A	9739	Homo sapiens SET domain containing 1A (SETD1A), mRNA.	GO:0006350|GO:0006355|GO:0016568	GO:0005634|GO:0016607	GO:0000166|GO:0003723|GO:0005515|GO:0008168|GO:0016740|GO:0018024	chr16	30903280	30903329	AGTCCTGGGGACTCCGTGCCTGGAACCCTGCCTCATCTGTTCCTGCCAGA
5860368	0.00994511	0.000770512	1.30671	up	CUL4B	8450	Homo sapiens cullin 4B (CUL4B), transcript variant 2, mRNA.	GO:0006511|GO:0006281|GO:0006511|GO:0007049	GO:0031461|GO:0005575|GO:0031461	GO:0031625|GO:0003674|GO:0005515|GO:0005515|GO:0031625	chrX	119669798	119670830	TGGGCTATTGGCCGACATATGTGCCTATGGAAGTTCATTTACCACCAGAG
1990092	0.000425822	1.18873e-05	1.39644	up	CYB561D1	284613	Homo sapiens cytochrome b-561 domain containing 1 (CYB561D1), transcript variant 2, mRNA.	GO:0006810|GO:0022900	GO:0016020|GO:0016021	GO:0005506|GO:0046872	chr1	110042791	110042840	GAGCAGGGAGGCTTCTGGTAGTGCTCTTGATGCTCCTGTGTCTGGTTGGC
1850739	0.033052	0.00390076	1.21532	down	SIRT6	51548	Homo sapiens sirtuin (silent mating type information regulation 2 homolog) 6 (S. cerevisiae) (SIRT6), mRNA.	GO:0006342|GO:0006355|GO:0006471|GO:0006476	GO:0005634|GO:0005677	GO:0003677|GO:0003956|GO:0008270|GO:0016757|GO:0017136|GO:0046872|GO:0051287	chr19	4174342	4174391	CCCTGCCACACCCCAGCCTCTGACTTGCTGTGTTGTCCAGAGGTGAGGCT
2640114	0.037666	0.00467868	1.2158	up	NECAP1	25977	Homo sapiens NECAP endocytosis associated 1 (NECAP1), mRNA.	GO:0006897|GO:0015031|GO:0006897	GO:0005886|GO:0005905|GO:0030125|GO:0031410|GO:0005905|GO:0016020|GO:0030125	GO:0005515|GO:0005515	chr12	8141354	8141403	CATTGCCTCCTTTTCCAGGCAGCTCTATTCTTGCAGAGCCATAGCAGGAC
3420347	0.000962127	3.51662e-05	1.38923	down	ATG16L1	55054	Homo sapiens ATG16 autophagy related 16-like 1 (S. cerevisiae) (ATG16L1), transcript variant 2, mRNA.	GO:0000045|GO:0006914|GO:0015031|GO:0051260	GO:0005737|GO:0005776|GO:0034045	GO:0005515	chr2	233868635	233868684	GCACAGCAGCGCCATCTTTCCGTTTCAGGGGTTGTGATGAAGGCCAAGGA
6250100	0.00156455	6.64672e-05	1.40416	down	CSNK1E	1454	Homo sapiens casein kinase 1, epsilon (CSNK1E), transcript variant 1, mRNA.	GO:0006468|GO:0006468|GO:0006468|GO:0006468|GO:0006281|GO:0006468|GO:0007165	GO:0005737	GO:0016301|GO:0004674|GO:0005524|GO:0000166|GO:0004674|GO:0005524|GO:0016740|GO:0000166|GO:0004674|GO:0005524|GO:0016740|GO:0000166|GO:0004674|GO:0005524|GO:0016740|GO:0000166|GO:0004674|GO:0005515|GO:0005515|GO:0005524|GO:0016740	chr22	38687118	38687167	GCCGGTGGCAGCTCCATCTTCCATTCCTGGTTTTAGGGCAGAATCCATGG
3460070	0.00215555	0.000102871	1.3396	up	SPP1	6696	Homo sapiens secreted phosphoprotein 1 (SPP1), transcript variant 2, mRNA.	GO:0001503|GO:0007155|GO:0001503|GO:0007155	GO:0005576|GO:0005615|GO:0005737|GO:0045177	GO:0005125|GO:0005515	chr4	88903786	88903835	GTCAGCTGGATGACCAGAGTGCTGAAACCCACAGCCACAAGCAGTCCAGA
4060064	2.60193e-05	3.25904e-07	1.61274	down	HMMR	3161	Homo sapiens hyaluronan-mediated motility receptor (RHAMM) (HMMR), transcript variant 2, mRNA.		GO:0005737|GO:0009986	GO:0005540|GO:0004872	chr5	162851071	162851120	CCCCAGATTCTTCAGCTTGATCCTGGAGGTCTTTTCTAGTCTGAGCTTCT
7650246	0.000519602	1.54961e-05	1.62544	down	GNA11	2767	Homo sapiens guanine nucleotide binding protein (G protein), alpha 11 (Gq class) (GNA11), mRNA.	GO:0001501|GO:0001508|GO:0006471|GO:0007165|GO:0007186|GO:0007507|GO:0045634|GO:0048066|GO:0060158	GO:0005737|GO:0005886	GO:0000166|GO:0003924|GO:0004871|GO:0005525|GO:0019001	chr19	3072186	3072235	CGCGGCCGTGAAGGACACCATCCTGCAGCTCAACCTCAAGGAGTACAACC
1090288	0.0268577	0.00294784	1.22702	up	PXMP3	5828	Homo sapiens peroxisomal membrane protein 3, 35kDa (PXMP3), transcript variant 1, mRNA.	GO:0001764|GO:0007031|GO:0007399	GO:0005777|GO:0005778|GO:0005779|GO:0016020|GO:0016021	GO:0005515|GO:0008270|GO:0046872	chr8	78058193	78058242	GAATGCGCTCTATGTGGAGAGTGGCCCACCATGCCTCACACCATAGGATG
70553	0.00545276	0.000343295	1.32986	up	FUT11	170384	Homo sapiens fucosyltransferase 11 (alpha (1,3) fucosyltransferase) (FUT11), mRNA.	GO:0006486	GO:0005794|GO:0016020|GO:0016021	GO:0008417|GO:0016757	chr10	75205627	75205676	GGGCCTCTCCTCAAGGAGAGATGGAGGGATACAATTCTTGGTTCAGTGGG
4290279	0.00154651	6.55369e-05	1.60664	up	ACLY	47	Homo sapiens ATP citrate lyase (ACLY), transcript variant 1, mRNA.	GO:0006101|GO:0006200|GO:0008152|GO:0008610|GO:0015936|GO:0044262	GO:0005737|GO:0005829|GO:0009346	GO:0000166|GO:0000287|GO:0003878|GO:0004775|GO:0005515|GO:0005524|GO:0008815|GO:0016740	chr17	40023728	40023777	CTGTCAGGATGGGGTCTTCCTCATTGTAGGGCGTTAGGATGTTGCTTTCT
7050600	0.000501632	1.48539e-05	1.41211	up	RARA	5914	Homo sapiens retinoic acid receptor, alpha (RARA), transcript variant 1, mRNA.	GO:0006350|GO:0006355|GO:0006350|GO:0006355|GO:0007165|GO:0030520|GO:0032355|GO:0032526|GO:0032689|GO:0032720|GO:0032736|GO:0032753|GO:0032754|GO:0045630|GO:0048384	GO:0005634|GO:0005634|GO:0009986	GO:0003700|GO:0003707|GO:0003708|GO:0004872|GO:0008270|GO:0043565|GO:0046872|GO:0001972|GO:0003700|GO:0003707|GO:0003708|GO:0003713|GO:0005515|GO:0005515|GO:0005515|GO:0008270|GO:0043565|GO:0046872	chr17	35767340	35767389	CCTGGAGCCCGTGGGTGCACCTGTTACTGTTGGGCTTTCCACTGAGATCT
4290446	0.00045848	1.31147e-05	1.70411	up	EIF4G2	1982	Homo sapiens eukaryotic translation initiation factor 4 gamma, 2 (EIF4G2), transcript variant 1, mRNA.	GO:0016070|GO:0006446|GO:0007050|GO:0008219|GO:0016070	GO:0016281	GO:0003743|GO:0005515|GO:0003743|GO:0005515|GO:0005515	chr11	10823235	10823284	CTCTTATCCCAGCTGCAAGGACAGTCGAAGGATATGCCACCTCGGTTTTC
6900176	0.0431234	0.00562856	1.23841	down	TSEN2	80746	Homo sapiens tRNA splicing endonuclease 2 homolog (S. cerevisiae) (TSEN2), mRNA.	GO:0006388|GO:0006397	GO:0000214|GO:0005634	GO:0000213|GO:0003676|GO:0004519|GO:0016787	chr3	12549607	12549656	GCACTTTCATACGCAGGCATCTCTTGTTACCTACATCTAAGCTGTTCCCG
5080192	0.00373469	0.000211088	1.31557	up	SERPINE2	5270	Homo sapiens serpin peptidase inhibitor, clade E (nexin, plasminogen activator inhibitor type 1), member 2 (SERPINE2), mRNA.	GO:0007275|GO:0007399|GO:0030154|GO:0030162|GO:0030162|GO:0030334	GO:0005576|GO:0005576	GO:0004867|GO:0004867|GO:0008201	chr2	224548185	224548234	GTCTTGCTAGACAAGGTTGCTGTTGTGCAGTGTGCCTGTCACTACTGGTC
780647	0.00340601	0.000185835	1.33107	up	OGFOD1	55239	Homo sapiens 2-oxoglutarate and iron-dependent oxygenase domain containing 1 (OGFOD1), mRNA.	GO:0019538|GO:0055114	GO:0005634|GO:0005737	GO:0005506|GO:0016491|GO:0016702|GO:0016706|GO:0031418|GO:0046872	chr16	55043105	55043154	CGGACGCTGTTACGGAAGAAACCTTGAAAAAGCAGGTGGCTGAGGCCTGG
3400138	0.026588	0.00291119	1.27132	up	CASC4	113201	Homo sapiens cancer susceptibility candidate 4 (CASC4), transcript variant 2, mRNA.		GO:0016020|GO:0016021		chr15	42493788	42493837	CATGAGTGCTGATGTGTTTTGGCAGATGAGCTTTCAGCTGAGGCCTGATG
1570669	0.0152992	0.00135017	1.25467	up	LACTB	114294	Homo sapiens lactamase, beta (LACTB), nuclear gene encoding mitochondrial protein, transcript variant 1, mRNA.		GO:0005739	GO:0016787	chr15	61220867	61220916	ATACTGGAGGGGCAGTGGGTGCCAGTAGTGTCCTGCTGGTCCTTCCTGAA
6220097	0.0129977	0.00109335	1.29135	up	PPAP2B	8613	Homo sapiens phosphatidic acid phosphatase type 2B (PPAP2B), transcript variant 2, mRNA.	GO:0001568|GO:0001702|GO:0006629|GO:0006644|GO:0008354|GO:0030111	GO:0005794|GO:0005829|GO:0005886|GO:0016021	GO:0004721|GO:0008195|GO:0008195|GO:0016787|GO:0042577	chr1	56960987	56961036	CCGTAAGTGTCCTTCCATGCAAGGTCCCACTCTAGGTGATAGACAGGGAC
6280040	0.011401	0.000924016	1.28832	up	YWHAG	7532	Homo sapiens tyrosine 3-monooxygenase/tryptophan 5-monooxygenase activation protein, gamma polypeptide (YWHAG), mRNA.	GO:0006469|GO:0006605|GO:0009966|GO:0009966|GO:0045664|GO:0048167	GO:0005737	GO:0005080|GO:0005159|GO:0008426|GO:0019904	chr7	75794683	75794732	CCTGAGGGCTGAAAACGGAGAGGGAATGGGAGACTTGATATTTAAGCAGC
7550626	0.000674162	2.17126e-05	1.38561	down	BIRC5	332	Homo sapiens baculoviral IAP repeat-containing 5 (BIRC5), transcript variant 3, mRNA.	GO:0000086|GO:0000086|GO:0000910|GO:0000910|GO:0006915|GO:0006916|GO:0006916|GO:0006916|GO:0006916|GO:0006916|GO:0006916|GO:0007049|GO:0007067|GO:0007067|GO:0031503|GO:0031503|GO:0031536|GO:0031536|GO:0031577|GO:0031577|GO:0043154|GO:0043154|GO:0043154|GO:0045931|GO:0045931|GO:0051303|GO:0051303	GO:0000775|GO:0000775|GO:0000775|GO:0005622|GO:0005634|GO:0005694|GO:0005730|GO:0005737|GO:0005737|GO:0005737|GO:0005814|GO:0005814|GO:0005829|GO:0005829|GO:0005876|GO:0005876|GO:0005876|GO:0005876|GO:0005881|GO:0005881|GO:0030496|GO:0030496|GO:0030496|GO:0030496|GO:0031021|GO:0031021|GO:0043234|GO:0043234|GO:0043234|GO:0043234	GO:0004869|GO:0005515|GO:0005515|GO:0005515|GO:0005515|GO:0005515|GO:0005515|GO:0005515|GO:0005515|GO:0005515|GO:0008017|GO:0008017|GO:0008270|GO:0008270|GO:0008270|GO:0042803|GO:0042803|GO:0042803|GO:0042803|GO:0043027|GO:0043027|GO:0046872|GO:0046982|GO:0046982|GO:0048037|GO:0048037|GO:0050897|GO:0051087	chr17	73733114	73733163	TGAGGCTTCTGGGCTATGGGTGAGGTTCCAATGGCAGGTTAGAGCCCCTC
3140537	0.0302262	0.00348086	1.22221	up	LRRC28	123355	Homo sapiens leucine rich repeat containing 28 (LRRC28), mRNA.			GO:0005515	chr15	97743856	97743905	CTGCCAGCTTGACACTGGGGAATCCAGCCAGTCCAGCACACTCTTCCATC
6370273	0.0350866	0.00424318	1.22172	down	CTPS	1503	Homo sapiens CTP synthase (CTPS), mRNA.	GO:0006139|GO:0006221|GO:0006241|GO:0006541|GO:0042493	GO:0005575|GO:0005829	GO:0003883|GO:0003883|GO:0003883|GO:0003883|GO:0005515|GO:0016874	chr1	41250525	41250574	TCCCCATGCCTGTGCGTGCGCTTCCTATTTCTAGGGCTGGGAAACACTCC
5910364	1.00582e-06	4.90176e-09	1.86029	down	TYMS	7298	Homo sapiens thymidylate synthetase (TYMS), mRNA.	GO:0006139|GO:0006231|GO:0006260|GO:0006281|GO:0009157|GO:0009165|GO:0048015|GO:0006231|GO:0006231|GO:0009165	GO:0005829	GO:0004799|GO:0004799|GO:0008168|GO:0016740|GO:0004799|GO:0004799|GO:0008168|GO:0016740	chr18	663033	663082	GGATATTGTCAGTCTTTAGGGGTTGGGCTGGATGCCGAGGTAAAAGTTCT
2710402	0.00390916	0.000223227	1.35212	down	ZCCHC14	23174	Homo sapiens zinc finger, CCHC domain containing 14 (ZCCHC14), mRNA.	GO:0007154		GO:0003676|GO:0005515|GO:0008270|GO:0035091|GO:0046872	chr16	87440216	87440265	CATCCGCCGCGGCCTCACGTGCGTTGTAACAAGCCCTCATCACATGTGTG
3360544	0.0489996	0.00679266	1.24069	up	MINA	84864	Homo sapiens MYC induced nuclear antigen (MINA), transcript variant 3, mRNA.	GO:0042254	GO:0005634|GO:0005634|GO:0005730|GO:0005737		chr3	99152340	99152389	CGGGGCTTGTATTTGATACTGCAAAGGAAGACGTGGAGTTACGGACCGGC
7000577	0.00346623	0.000190222	1.33905	up	GYPC	2995	Homo sapiens glycophorin C (Gerbich blood group) (GYPC), transcript variant 2, mRNA.	GO:0006487|GO:0006493|GO:0009887	GO:0005886|GO:0005887|GO:0030863	GO:0005515	chr2	127170296	127170345	CTTGATTCTTCCCGAGATAGCCACCTGGAAACACTAGGTGCCTGCCCAGG
7210398	0.0472245	0.00643902	1.19715	up	GYPC	2995	Homo sapiens glycophorin C (Gerbich blood group) (GYPC), transcript variant 2, mRNA.	GO:0006487|GO:0006493|GO:0009887	GO:0005886|GO:0005887|GO:0030863	GO:0005515	chr2	127170471	127170520	GGGCAGTGCAGGACAACATCAGCTCACTGGCAGGAAAGTCCTTGTTGAGG
4010343	0.0452787	0.0060322	1.21835	up	TYW3	127253	Homo sapiens tRNA-yW synthesizing protein 3 homolog (S. cerevisiae) (TYW3), mRNA.	GO:0008033		GO:0008168|GO:0016740	chr1	75003783	75003832	AGGAAATTTGGGCAGGAAAGGGAACTCACAGTGTCGGAATGCCTGGAGCA
1440259	0.0450936	0.00597938	1.22284	down	PCM1	5108	Homo sapiens pericentriolar material 1 (PCM1), mRNA.	GO:0042384|GO:0042384|GO:0051297	GO:0000242|GO:0005737|GO:0005856|GO:0031513|GO:0034451	GO:0005515	chr8	17849013	17849062	GGAAACTCCTGAAAGCTCTCTGGCTGGAAGTCCTGATACTGAATCTCCAG
4150630	0.00452575	0.000269704	1.3123	down	NKIRAS1	28512	Homo sapiens NFKB inhibitor interacting Ras-like 1 (NKIRAS1), mRNA.	GO:0007249|GO:0007264	GO:0005575|GO:0005737	GO:0000166|GO:0003924|GO:0005525	chr3	23933910	23933959	CCGTTTTTTCCTTAGCCAGACCCCTGTTGATAGACCAGATACTTGAGGGC
830278	0.000825711	2.78182e-05	1.36825	up	GLIPR2	152007	Homo sapiens GLI pathogenesis-related 2 (GLIPR2), mRNA.		GO:0000139|GO:0005576|GO:0005794|GO:0016020		chr9	36153460	36153509	GCAGCTCCTGAAGGTCTGTGTTGCACTGTCACCAGTCTCAAGCTATGCCT
240577	0.0292402	0.00331465	1.31107	down	MMGT1	93380	Homo sapiens membrane magnesium transporter 1 (MMGT1), mRNA.				chrX	135044488	135044537	GGAACGACTCACTTAATAACCAGGGAACCAGCCAAATACTGTGCAGCCGC
110382	4.91621e-12	1.04168e-15	3.88739	down	RAC2	5880	Homo sapiens ras-related C3 botulinum toxin substrate 2 (rho family, small GTP binding protein Rac2) (RAC2), mRNA.	GO:0006935|GO:0007264|GO:0008284|GO:0030031|GO:0030036|GO:0006935|GO:0007264|GO:0008284|GO:0030031|GO:0030036|GO:0007264|GO:0006935|GO:0007165|GO:0007264|GO:0008284|GO:0010310|GO:0030031|GO:0030036|GO:0060263	GO:0005622|GO:0005624|GO:0005635|GO:0005737|GO:0005622|GO:0005624|GO:0005635|GO:0005737|GO:0005622|GO:0016020|GO:0005622|GO:0005624|GO:0005635|GO:0005737	GO:0000166|GO:0003924|GO:0005525|GO:0000166|GO:0003924|GO:0005525|GO:0000166|GO:0005525|GO:0000166|GO:0005525|GO:0000166|GO:0003924|GO:0005515|GO:0005525	chr22	37621465	37621514	GGGGATATCTGCTCAGCCAATGGAAAATCTGGGTTCAACCAGCCCCTGCC
6250609	0.000889625	3.1291e-05	1.42786	down	KPNA2	3838	Homo sapiens karyopherin alpha 2 (RAG cohort 1, importin alpha 1) (KPNA2), mRNA. XM_001133262 XM_001133265 XM_001133267 XM_001133271	GO:0006606|GO:0006886|GO:0000018|GO:0000072|GO:0000085|GO:0006259|GO:0006607|GO:0006886|GO:0044419	GO:0005634|GO:0005643|GO:0005737|GO:0005634|GO:0005643|GO:0005654|GO:0005737	GO:0005488|GO:0008565|GO:0005515|GO:0008139|GO:0008565	chr17	63473387	66031851	AGCATCCTGTAAATAAACATTCAAGTCCACCCTTTTCTTGACTTCAAAAA
670382	0.028865	0.00326547	1.22842	down	ARL6IP6	151188	Homo sapiens ADP-ribosylation-like factor 6 interacting protein 6 (ARL6IP6), mRNA.		GO:0016020|GO:0016021	GO:0005515	chr2	153324567	153324616	AGCTGCTCTTACTGTAGCATGGTGCCTCATGTAAACCCACACTGGAGCGA
3190689	0.015328	0.00135352	1.37513	down	RBM26	64062	Homo sapiens RNA binding motif protein 26 (RBM26), mRNA.				chr13	79896550	79908480	GCAGCTGCAGTTCATGGAGCTCGTTTCAAAGGGCAAGATCTAAAACTGGC
4830291	0.00122656	4.80149e-05	1.42055	down	SASS6	163786	Homo sapiens spindle assembly 6 homolog (C. elegans) (SASS6), mRNA.	GO:0007049|GO:0051298	GO:0005813|GO:0005813		chr1	100549486	100549535	GCACTTGCTATTCTGGAAAGAAGCCTCTTGGTGATTTTGGAAGGAGCTTT
4730605	4.56426e-07	1.73958e-09	1.84264	down	AURKA	6790	Homo sapiens aurora kinase A (AURKA), transcript variant 5, mRNA.	GO:0000278|GO:0006468|GO:0007051|GO:0007067|GO:0031647|GO:0048015|GO:0006468|GO:0000278|GO:0006468|GO:0000278|GO:0000278|GO:0000278|GO:0006468|GO:0000278|GO:0006468	GO:0005634|GO:0005813|GO:0005819	GO:0000166|GO:0004674|GO:0005515|GO:0005515|GO:0005515|GO:0005524|GO:0016740|GO:0031625|GO:0000166|GO:0004674|GO:0005524|GO:0016740|GO:0000166|GO:0004672|GO:0005524|GO:0031625|GO:0016301|GO:0031625|GO:0016301|GO:0031625|GO:0004672|GO:0005524|GO:0031625|GO:0000166|GO:0004674|GO:0005524|GO:0016740|GO:0031625	chr20	54944638	54944687	GAATGCTGTGTGTCTGTCCGGCACCCCGGTAGGCCTGATTGGGTTTCTAG
6420736	0.0104033	0.000820011	1.2813	up	DNAJC12	56521	Homo sapiens DnaJ (Hsp40) homolog, subfamily C, member 12 (DNAJC12), transcript variant 2, mRNA.	GO:0006457		GO:0031072|GO:0051082	chr10	69571298	69571347	CTGGCGAAGGAGCCAGATGTCGATGCCATTCCAGCAGTGGGAAGCTTTGA
7330563	0.0270961	0.00298118	1.23053	down	FAM178A	55719	Homo sapiens family with sequence similarity 178, member A (FAM178A), transcript variant 1, mRNA.				chr10	102699945	102700462	GGGGATGACTGTGGTGGTTTGTCGCTAAGGAGGCAACAGTAGGGTCCAGG
6020022	0.00599229	0.00038789	1.29195	up	UBE2Z	65264	Homo sapiens ubiquitin-conjugating enzyme E2Z (UBE2Z), mRNA.	GO:0006511|GO:0006915|GO:0043687|GO:0051246|GO:0043687|GO:0051246	GO:0005634|GO:0005634|GO:0005730|GO:0005737|GO:0005737|GO:0005634|GO:0005730|GO:0005737	GO:0004842|GO:0016874|GO:0019787	chr17	44341129	44341178	TCCGACTGGGACGGCGAGCGCACCGCGCCGCAGTGTCTACTCCGGATCAA
5890253	0.00518168	0.000320595	1.39107	down	ITGB3BP	23421	Homo sapiens integrin beta 3 binding protein (beta3-endonexin) (ITGB3BP), mRNA.	GO:0006350|GO:0006355|GO:0006915|GO:0007155|GO:0007165|GO:0007165	GO:0000775|GO:0005624|GO:0005634|GO:0005694|GO:0005737	GO:0004871|GO:0008022	chr1	63912495	63919605	CAGGACTTCCTCACAAAGCATCACGTCATCTTGACAGCTATGAATTCCTT
2120097	0.0274307	0.00302961	1.23689	down	CHAF1A	10036	Homo sapiens chromatin assembly factor 1, subunit A (p150) (CHAF1A), mRNA.	GO:0006260|GO:0006281|GO:0006335|GO:0006350|GO:0006355|GO:0006461|GO:0007049	GO:0005634|GO:0005678	GO:0003682|GO:0051082	chr19	4394296	4394345	ACTTGTAAATGAATTGAAGCGTCAGGACCACCCGCCTGGCCACGTGCGCG
4730674	0.00746812	0.000526542	1.2756	down	SKP2	6502	Homo sapiens S-phase kinase-associated protein 2 (p45) (SKP2), transcript variant 1, mRNA.	GO:0000082|GO:0006511|GO:0008283		GO:0005515|GO:0005515|GO:0005515|GO:0005515|GO:0005515	chr5	36171768	36171817	GGCTGTTGCGCATGTGTCAGAGACCATCACCCAGCTGAATCTTAGCGGCT
3310242	0.0029864	0.000156613	1.35979	down	EPOR	2057	Homo sapiens erythropoietin receptor (EPOR), mRNA.	GO:0007165|GO:0007420|GO:0007507	GO:0005576|GO:0005886|GO:0005887	GO:0004900|GO:0005515|GO:0005515|GO:0005515	chr19	11488573	11488622	CTCAGAGAACCAGTGCAGACTCAAGACTTATGGAACAGGGATGGCGAGGC
1710541	0.00117932	4.52289e-05	1.35271	down	TMEM71	137835	Homo sapiens transmembrane protein 71 (TMEM71), mRNA.		GO:0016020|GO:0016021		chr8	133791561	133791610	TGACTCAAGGGCTGTAGATGTTCCCTTTCCACCCCCCACACTTGGTGCGT
6770608	0.00108173	4.05693e-05	1.3946	up	BNIP3	664	Homo sapiens BCL2/adenovirus E1B 19kDa interacting protein 3 (BNIP3), nuclear gene encoding mitochondrial protein, mRNA.	GO:0001666|GO:0006309|GO:0006338|GO:0006800|GO:0006916|GO:0006917|GO:0006917|GO:0006917|GO:0008219|GO:0008219|GO:0008634|GO:0044419|GO:0045837|GO:0046902|GO:0051402|GO:0051607	GO:0005634|GO:0005635|GO:0005654|GO:0005737|GO:0005739|GO:0005739|GO:0005739|GO:0016020|GO:0016021|GO:0030425|GO:0031307|GO:0031966|GO:0031966	GO:0042803|GO:0042803|GO:0046982	chr10	133781337	133781386	CACCCTGGATGATCAGTTTTCTGCTGAAGGCACCTACTCAGTATCTTTTC
1430059	0.00980109	0.000755408	1.2924	down	BAT2	7916	Homo sapiens HLA-B associated transcript 2 (BAT2), mRNA.		GO:0005634|GO:0005737	GO:0005515|GO:0005515|GO:0005515	chr6	31605087	31605257	GACCTTTACCAGCAGGCCTCCCCACCAGATGCCCTGCGCTGGATACCTAA
1050746	0.0031849	0.000170957	1.90249	up	HM13	81502	Homo sapiens histocompatibility (minor) 13 (HM13), transcript variant 2, mRNA.		GO:0005783|GO:0005789|GO:0016020|GO:0016021	GO:0004190|GO:0005515|GO:0008233	chr20	29589668	29589717	TCCTGCTGTCCATGTATTTCTTCGTGCTGGGAATCCTGGCCCTGTCCCAC
2190341	0.00220315	0.000106318	2.24588	up	AP1S1	1174	Homo sapiens adaptor-related protein complex 1, sigma 1 subunit (AP1S1), transcript variant 2, mRNA.	GO:0006886|GO:0006898	GO:0005794|GO:0005829|GO:0005905|GO:0016020|GO:0030117|GO:0030121|GO:0030659|GO:0031410	GO:0005515|GO:0008565	chr7	100586621	100586670	GCAGGGAAAACTGCGGCTGCAAAAATGGTACCTGGCCACTTCGGACAAGG
6660279	0.0339654	0.00406081	1.2122	down	DOHH	83475	Homo sapiens deoxyhypusine hydroxylase/monooxygenase (DOHH), mRNA.	GO:0008612|GO:0008612|GO:0055114	GO:0005575	GO:0005506|GO:0005515|GO:0019135|GO:0046872	chr19	3441959	3442008	CGTTATGGTGGCTTCAGCTTCACTAGGAATGGGACACAGGGTCTGGGGGC
5570152	0.00321011	0.000172596	2.24942	up	ATP1A1	476	Homo sapiens ATPase, Na+/K+ transporting, alpha 1 polypeptide (ATP1A1), transcript variant 1, mRNA.	GO:0002026|GO:0006810|GO:0006812|GO:0008217|GO:0031947|GO:0042493|GO:0045822|GO:0045823|GO:0045989|GO:0006812|GO:0006813|GO:0006814|GO:0008152|GO:0030317|GO:0030641	GO:0005792|GO:0016323|GO:0042383|GO:0016020|GO:0005624|GO:0005890|GO:0016020|GO:0016021|GO:0042470	GO:0003869|GO:0005391|GO:0005515|GO:0005524|GO:0005524|GO:0015662|GO:0000166|GO:0000287|GO:0005391|GO:0005515|GO:0005515|GO:0005524|GO:0015077|GO:0016787|GO:0016820|GO:0030955|GO:0031402	chr1	116743578	116743627	CCCTGGCTTATGAGCAGGCTGAGAGTGACATCATGAAGAGACAGCCCAGA
840040	0.0475393	0.00651721	1.214	up	FLJ35258	284297	Homo sapiens hypothetical protein 284297 (FLJ35258), mRNA.				chr19	60722116	60722165	TGCCTGCACCAACCACCACTACCCCAGAGGAAGAAGAAAGACCCCTGAGG
2630703	1.49309e-05	1.58183e-07	1.72604	down	FAM49B	51571	Homo sapiens family with sequence similarity 49, member B (FAM49B), mRNA.				chr8	130923331	130923380	CTCCTGCATGGCAAAACTGCCTATTCTGCTATTTAAAAACCCTCAATGAC
7160079	4.60899e-05	6.93376e-07	1.64652	down	FAM49B	51571	Homo sapiens family with sequence similarity 49, member B (FAM49B), mRNA.				chr8	130928250	130928299	GCACCTGCTGTAGACAGAAGACAGTATTCTGCAATGACTGAGAATGCAGT
1850482	0.0298377	0.00341399	1.21664	up	TNK2	10188	Homo sapiens tyrosine kinase, non-receptor, 2 (TNK2), transcript variant 1, mRNA.	GO:0006468|GO:0007264|GO:0050731	GO:0005886	GO:0000166|GO:0000287|GO:0004715|GO:0005095|GO:0005515|GO:0005524|GO:0016740	chr3	197074722	197074771	GAGGGACATCAGTGCTTCCTCTTCCACCCAATTCCCCCACGCGGTTCCAT
110561	0.00550178	0.000347978	1.29015	up	NDST2	8509	Homo sapiens N-deacetylase/N-sulfotransferase (heparan glucosaminyl) 2 (NDST2), mRNA.	GO:0009987|GO:0015012	GO:0000139|GO:0005794|GO:0016020|GO:0016021	GO:0008146|GO:0015016|GO:0016740|GO:0016787	chr10	75231778	75231827	CTTTAGCCAGGCAGTGGGATCTACCTGTGGCCCGGCCTCCCTAATGTCAT
5550348	0.00268131	0.000136068	1.3181	down	ICMT	23463	Homo sapiens isoprenylcysteine carboxyl methyltransferase (ICMT), mRNA.	GO:0006464|GO:0006481|GO:0006612|GO:0008104	GO:0005624|GO:0005783|GO:0005789|GO:0016020|GO:0016021	GO:0004671|GO:0008168|GO:0016740	chr1	6281466	6281515	CCTCGGCCTCTCTGTCATGCTGGGAAGTGCCTACTCTCTGGGCCACTGCT
4290411	0.0220421	0.00222429	1.2802	up	BCL2L1	598	Homo sapiens BCL2-like 1 (BCL2L1), nuclear gene encoding mitochondrial protein, transcript variant 1, mRNA.	GO:0009314|GO:0042981|GO:0043524|GO:0045768|GO:0009314|GO:0042981|GO:0043524|GO:0045768|GO:0009314|GO:0042981|GO:0043524|GO:0045768|GO:0009314|GO:0042981|GO:0043524|GO:0045768|GO:0001836|GO:0008634|GO:0009314|GO:0042981|GO:0043524|GO:0045768|GO:0046902|GO:0051881	GO:0005739|GO:0005739|GO:0005739|GO:0016020|GO:0005739|GO:0005634|GO:0005739|GO:0005741|GO:0005741|GO:0005741|GO:0005741|GO:0005741|GO:0016020|GO:0016021|GO:0031965	GO:0042802	chr20	30309518	30309567	GTGGAAAGCGTAGACAAGGAGATGCAGGTATTGGTGAGTCGGATCGCAGC
2070291	1.4958e-07	4.67488e-10	1.86957	down	PGM1	5236	Homo sapiens phosphoglucomutase 1 (PGM1), mRNA.	GO:0005975|GO:0006006|GO:0006006	GO:0005737|GO:0005829	GO:0000287|GO:0004614|GO:0004614|GO:0004614|GO:0016853	chr1	63898163	63898212	GCCCTCCTGCATTGCTGCTGCGTGGGTATTTGTCTCCTTAGCCATCAGGT
2630050	0.0436785	0.00572185	1.20671	up	HERC4	26091	Homo sapiens hect domain and RLD 4 (HERC4), transcript variant 2, mRNA.	GO:0006464|GO:0006511	GO:0005622|GO:0005737	GO:0016874|GO:0016881	chr10	69365931	69365980	TGGTGCAACAGAAGTGAAAGAGCTGGTTCTAAATGGTGCAGACACAGCTG
3190379	0.0439733	0.00577349	1.22919	down	TGFBR3	7049	Homo sapiens transforming growth factor, beta receptor III (TGFBR3), mRNA.	GO:0001837|GO:0003007|GO:0006955|GO:0007179|GO:0007179|GO:0007243|GO:0016049|GO:0016477|GO:0030509|GO:0032354|GO:0051271	GO:0005576|GO:0005615|GO:0005886|GO:0005887|GO:0009897|GO:0043231	GO:0005024|GO:0005114|GO:0005515|GO:0005515|GO:0005515|GO:0005515|GO:0005515|GO:0005515|GO:0008201|GO:0015026|GO:0050431|GO:0050431	chr1	91920750	91920799	TGCATGGCAAATCCTGTCGGTCTCCAGTTGGTTATCTGAATAGTGTCACC
1300553	0.00558074	0.000355042	1.30912	up	RFXANK	8625	Homo sapiens regulatory factor X-associated ankyrin-containing protein (RFXANK), transcript variant 1, mRNA.	GO:0006350|GO:0006355|GO:0007265	GO:0005634|GO:0005737	GO:0003700|GO:0003712	chr19	19169010	19169059	AGCTCGCAGCACAGGGGGAGCTGGACCAGCTGAAGGAGCATTTGCGGAAA
2650678	0.00628807	0.000414031	1.28314	up	RSPH3	83861	Homo sapiens radial spoke 3 homolog (Chlamydomonas) (RSPH3), mRNA.				chr6	159318478	159318527	CAACAGCCAAGTCAGCAAGCAATCAGGTAATGATGTGCGAGTCCCCTCAG
2100743	0.0357413	0.00434697	1.27729	down	DYRK2	8445	Homo sapiens dual-specificity tyrosine-(Y)-phosphorylation regulated kinase 2 (DYRK2), transcript variant 1, mRNA.	GO:0006468|GO:0006915|GO:0042771|GO:0045725	GO:0005634|GO:0005737	GO:0000166|GO:0000287|GO:0004674|GO:0004713|GO:0005524|GO:0016740|GO:0030145	chr12	66340325	66340374	AGTACTTAAAAGCGTGGTCCCCAGTGAGGCCAAGAAAGTTTCCGGTTAAG
3180563	6.87474e-06	5.64458e-08	1.79488	down	GPR180	160897	Homo sapiens G protein-coupled receptor 180 (GPR180), mRNA.		GO:0016020|GO:0016021		chr13	94079051	94079100	ATGTCTCGCTAATAACCCCAGCTATTGTCTGTTGTGTTCAGCTGAGATGC
2900255	0.00248791	0.000122564	1.38516	up	ZBTB45	84878	Homo sapiens zinc finger and BTB domain containing 45 (ZBTB45), mRNA.	GO:0006350|GO:0006355	GO:0005622|GO:0005634	GO:0003677|GO:0005515|GO:0008270|GO:0046872	chr19	63716727	63716776	ATATGGGGGCTGGGCCTCGGGACTCTCGCTCTAATAAAGGACTGTAGGCC
1740291	0.00286923	0.00014834	1.3316	down	TMSB15A	11013	Homo sapiens thymosin beta 15a (TMSB15A), mRNA.				chrX	101768868	101768917	GGCGTCTTCGGATATCTTCTCACCTATGTTCCCTGGCTAAGAAGTCAGAG
430674	0.0162116	0.00146933	1.29208	down	ARC	23237	Homo sapiens activity-regulated cytoskeleton-associated protein (ARC), mRNA.	GO:0006897|GO:0007275|GO:0007492|GO:0009952	GO:0001669|GO:0005737|GO:0005768|GO:0005856|GO:0005886|GO:0030054|GO:0042995|GO:0045202|GO:0045211		chr8	143692829	143692878	CAGACCACTCTGACAAGTCTTCAGCCCACACCCTGCCAGCCCCACAGATT
5360148	0.000279432	6.7201e-06	1.42292	up	LIPA	3988	Homo sapiens lipase A, lysosomal acid, cholesterol esterase (LIPA), transcript variant 2, mRNA.	GO:0006629|GO:0006629|GO:0006487|GO:0016042	GO:0005764	GO:0004771|GO:0016787	chr10	90973522	90974588	CCCGCTACTGTCGTTATTGATCACATCTGTGTGAAGCCAAAGCCCCGTGG
1660541	0.000332841	8.51585e-06	1.42988	down	ESRRA	2101	Homo sapiens estrogen-related receptor alpha (ESRRA), mRNA.	GO:0006350|GO:0006355|GO:0006350|GO:0006355	GO:0005634|GO:0005634	GO:0003700|GO:0003707|GO:0005496|GO:0008270|GO:0043565|GO:0046872|GO:0005515|GO:0003700|GO:0003707|GO:0005496|GO:0008270|GO:0019904|GO:0043565|GO:0046872	chr11	63840438	63840487	TGCCCCCTTCGCTCCTCCTCTCATCATTTGCATTGGGCATTAGTGTCCCC
2600431	0.000280558	6.76205e-06	1.50927	down	SLC43A3	29015	Homo sapiens solute carrier family 43, member 3 (SLC43A3), mRNA.		GO:0016020|GO:0016021		chr11	57175167	57175216	CCACCACCTTTGAGGACCTCGTGTCCCAAAAGACTTTGCCTATCCCAGCA
1990037	0.01184	0.000967744	1.30398	up	CHI3L1	1116	Homo sapiens chitinase 3-like 1 (cartilage glycoprotein-39) (CHI3L1), mRNA.	GO:0005975|GO:0005975|GO:0006032|GO:0006810	GO:0005576|GO:0005578|GO:0005615|GO:0016020	GO:0003824|GO:0004553|GO:0043169|GO:0003824|GO:0004568|GO:0005201|GO:0005215|GO:0005529|GO:0043169	chr1	203148339	203148388	GGGATGGGGCTGTGGGGATAGTGAGGCATCGCAATGTAAGACTCGGGATT
2630711	0.0288634	0.00326276	1.23672	down	MCM4	4173	Homo sapiens minichromosome maintenance complex component 4 (MCM4), transcript variant 2, mRNA.	GO:0006268|GO:0006260|GO:0006260|GO:0006268|GO:0006270|GO:0006350|GO:0006355	GO:0005634|GO:0005654|GO:0005654|GO:0005654|GO:0005654|GO:0005654|GO:0005654|GO:0005654|GO:0005730	GO:0003678|GO:0003697|GO:0005515|GO:0016787|GO:0017111|GO:0000166|GO:0003677|GO:0003678|GO:0003697|GO:0005515|GO:0005524|GO:0017111	chr8	48890001	48890050	GATGACAGGCATAGCCTGGGCATATCACCTCATTGGTAAAGGGCTAGAGC
270546	0.0045653	0.00027327	1.31635	up	PIP4K2B	8396	Homo sapiens phosphatidylinositol-5-phosphate 4-kinase, type II, beta (PIP4K2B), mRNA.	GO:0007166|GO:0046488	GO:0005783|GO:0005789|GO:0005886	GO:0000166|GO:0005057|GO:0005515|GO:0005524|GO:0016301|GO:0016308|GO:0016309|GO:0016740	chr17	36934043	36934625	GGGTTCTACGGTTGCCAGAGAAGCGAGCGACAAGGAGAAGGCCAAGGACT
620239	0.00134222	5.4107e-05	1.4035	up	RCAN1	1827	Homo sapiens regulator of calcineurin 1 (RCAN1), transcript variant 3, mRNA.	GO:0007165|GO:0007417|GO:0008015|GO:0019722	GO:0005634	GO:0003700|GO:0005515	chr21	35899067	35899116	CTCTTGGAAAGGAATCTCACTAGGGGCTTGACTGCGTGGGTCTGTAGCGC
7050326	8.03272e-05	1.39061e-06	1.496	down	CDKN2D	1032	Homo sapiens cyclin-dependent kinase inhibitor 2D (p19, inhibits CDK4) (CDKN2D), transcript variant 2, mRNA.	GO:0000079|GO:0000082|GO:0000731|GO:0006916|GO:0007050|GO:0008285|GO:0009411|GO:0030308|GO:0032526|GO:0033280|GO:0042326|GO:0043154|GO:0045786|GO:0048102	GO:0005634|GO:0005634|GO:0005737	GO:0004861|GO:0019901	chr19	10677349	10677398	CTAGAAGCTGGTGGCCTTGGCCGGCTGTGCTCAGAGACCTGAAGTGTGCA
3840332	0.0277068	0.00307478	1.34613	up	GABARAP	11337	Homo sapiens GABA(A) receptor-associated protein (GABARAP), mRNA.	GO:0000226|GO:0006605|GO:0007268|GO:0015031	GO:0000139|GO:0000421|GO:0005737|GO:0005764|GO:0005790|GO:0005794|GO:0005874|GO:0005875|GO:0005886|GO:0015629	GO:0005515|GO:0005515|GO:0008017|GO:0048487|GO:0050811	chr17	7143765	7143814	TGGGGGTAGTTGGAAGGGACTGAAATTGTGGGGGGAAGGTAGGAGGCACA
2760148	0.00417604	0.000243791	1.29901	up	IL11RA	3590	Homo sapiens interleukin 11 receptor, alpha (IL11RA), transcript variant 1, mRNA.		GO:0005887|GO:0016020	GO:0004896	chr9	34651778	34651827	TGCATGTATGTAGGTGCCTGGGGAGTGTGTGTGGGTCCTTGGCTCTTGGC
70368	0.00189512	8.70361e-05	1.34269	up	C21orf34	388815	Homo sapiens chromosome 21 open reading frame 34 (C21orf34), transcript variant 3, mRNA.				chr21	16901230	16901279	GCCCCAGACTTGTCGCACGGATGCAGAAAACTTAATGGAGGAGGCTGAGG
4210129	0.0478158	0.0065627	1.32758	down	ELOVL5	60481	Homo sapiens ELOVL family member 5, elongation of long chain fatty acids (FEN1/Elo2, SUR4/Elo3-like, yeast) (ELOVL5), mRNA.	GO:0006633	GO:0005783|GO:0005789|GO:0016020|GO:0016021		chr6	53240603	53240652	CTCACACATTTGAGGCAGTGGTCAAACAGGTAAAGCCTATGATGTGTGTC
510725	0.00206767	9.73706e-05	1.5124	up	NDUFA10	4705	Homo sapiens NADH dehydrogenase (ubiquinone) 1 alpha subcomplex, 10, 42kDa (NDUFA10), nuclear gene encoding mitochondrial protein, mRNA.	GO:0006120|GO:0006139|GO:0006810|GO:0022900|GO:0006139	GO:0005739|GO:0005747|GO:0005759|GO:0005739	GO:0005524|GO:0008137|GO:0016491|GO:0016773|GO:0005524|GO:0016773	chr2	240951105	240954196	CCCGTTCCAGAGGTCCAGAGGCGGATTCAGAAGAAAGGAGATCCACATGA
4260333	0.000262482	6.25685e-06	1.48332	up	IL6ST	3572	Homo sapiens interleukin 6 signal transducer (gp130, oncostatin M receptor) (IL6ST), transcript variant 1, mRNA.	GO:0005977|GO:0006955|GO:0007166|GO:0008284|GO:0008593	GO:0005576|GO:0005886|GO:0005886|GO:0005887	GO:0004872|GO:0004915|GO:0004924|GO:0005515|GO:0005515	chr5	55290680	55290729	TAGATCCATCCCATACTCAAGGCTACAGAACTGTACAACTCGTGTGGAAG
1510152	0.0011313	4.30874e-05	1.36568	down	PSRC1	84722	Homo sapiens proline/serine-rich coiled-coil 1 (PSRC1), transcript variant 3, mRNA.	GO:0001578|GO:0007049|GO:0030308|GO:0031116|GO:0043193	GO:0005737|GO:0005819|GO:0030496	GO:0008017	chr1	109822526	109822575	TCTCTGGGTTGAAAGAAGATTAGGGGAAAAGAGGTCACCTTCCAGCAGTG
2480025	0.0342028	0.00409643	1.21871	up	ACP2	53	Homo sapiens acid phosphatase 2, lysosomal (ACP2), mRNA.	GO:0001501|GO:0007040	GO:0005764|GO:0016021	GO:0003993|GO:0016787	chr11	47217622	47217671	GTCACCCCTTCAACTGGAGCAGGACGGAAGGTTGTCTGTACTTGGGAGGG
6450669	8.92585e-06	7.84877e-08	1.85155	down	ANLN	54443	Homo sapiens anillin, actin binding protein (ANLN), mRNA.	GO:0000910|GO:0000921|GO:0007049|GO:0007067|GO:0007096	GO:0005634|GO:0005737|GO:0005826	GO:0003779	chr7	36446055	36446104	TCAGAAAAGTGATGTGGACATAGGAGGCAATGTGTGAGACTTGGGGGTTC
840068	0.00746812	0.000526344	1.27779	up	C3AR1	719	Homo sapiens complement component 3a receptor 1 (C3AR1), mRNA.	GO:0006935|GO:0006954|GO:0007165|GO:0007186|GO:0007204|GO:0008015	GO:0005886|GO:0005887	GO:0004435|GO:0004872|GO:0004876|GO:0004943	chr12	8211074	8211123	GAATCGGAATCTCTGGGGGTTGGGACCCAGCAAGGGCACTTAACAAACCC
2650364	4.86956e-07	1.90882e-09	2.01504	down	FOXM1	2305	Homo sapiens forkhead box M1 (FOXM1), transcript variant 3, mRNA.	GO:0001558|GO:0001570|GO:0001889|GO:0006350|GO:0006355|GO:0006366|GO:0007049|GO:0008284|GO:0045944	GO:0005634	GO:0003700|GO:0003700|GO:0003700|GO:0003700|GO:0003702|GO:0005515|GO:0005515|GO:0005515|GO:0043565	chr12	2967199	2967248	ACAAGTGGATCTGCTTGCCAGAGTCCTTTTTGCCCCTCCCTGCCACCTCC
5290187	0.0456445	0.00612687	1.24303	down	WDYHV1	55093	Homo sapiens WDYHV motif containing 1 (WDYHV1), mRNA.				chr8	124453916	124453965	AAGCCAGTAATCGTTTTTGTTCAGATAGAGGTGTGGAGGTAGAGCCAGCC
6380747	0.0464005	0.00627082	1.19616	down	ANKRD32	84250	Homo sapiens ankyrin repeat domain 32 (ANKRD32), mRNA.		GO:0005622		chr5	94056705	94056754	GGGGTACACACTGAGGCCTTGATGATAACATTGGAAATGATGTGTCGGTC
360280	0.00013861	2.84091e-06	1.51832	down	PNRC2	55629	Homo sapiens proline-rich nuclear receptor coactivator 2 (PNRC2), mRNA.	GO:0006350|GO:0006355	GO:0005634		chr1	24162164	24162213	GTTTGGTCAAGGGGTAGGTGCAACCCAATGGACCACTTATGCAAAAGATG
650372	0.0189068	0.00181877	1.25063	up	UBE2Z	65264	PREDICTED: Homo sapiens ubiquitin-conjugating enzyme E2Z (putative), transcript variant 3 (UBE2Z), mRNA.	GO:0006511|GO:0006915|GO:0043687|GO:0051246|GO:0043687|GO:0051246	GO:0005634|GO:0005634|GO:0005730|GO:0005737|GO:0005737|GO:0005634|GO:0005730|GO:0005737	GO:0004842|GO:0016874|GO:0019787				CCTTGTGTATTTTCACCCCAGCCTGTAGTCCTCCTCACTTCAACCCCAGG
1400673	1.92543e-08	2.75381e-11	2.01238	down	CDCA5	113130	Homo sapiens cell division cycle associated 5 (CDCA5), mRNA.	GO:0000082|GO:0007049|GO:0007067|GO:0007076|GO:0007080|GO:0051301	GO:0005634|GO:0005737|GO:0008278	GO:0003682|GO:0005515	chr11	64601683	64601732	GCCTAGGTGTCCTTGAGCTGAACCGCACTGAAGAACTCTTGTCCTCACTG
2640086	0.00261327	0.00013137	1.33623	up	C1orf85	112770	Homo sapiens chromosome 1 open reading frame 85 (C1orf85), mRNA.		GO:0016020|GO:0016021		chr1	156262580	156262629	GGGACAGGGCTATTGATAAGGTCCCCTTGGTGTTGCCTTCTTGCATCTCC
2320037	0.00926093	0.000699058	1.31155	down	TP53RK	112858	Homo sapiens TP53 regulating kinase (TP53RK), mRNA.	GO:0006468	GO:0005634	GO:0000166|GO:0002039|GO:0004674|GO:0004713|GO:0005524|GO:0016740|GO:0016301	chr20	45313329	45313378	GGCTAGTACCTGCTTTGTTGGGGTATGGTTGGCTCGTGTGCATTAAGTCA
610020	0.00453033	0.000270697	1.30598	up	CHRNA9	55584	Homo sapiens cholinergic receptor, nicotinic, alpha 9 (CHRNA9), mRNA.	GO:0006811|GO:0006816	GO:0005886|GO:0016021|GO:0030054|GO:0045202|GO:0045211	GO:0004889|GO:0005216|GO:0005230|GO:0005262|GO:0005509|GO:0030594	chr4	40051504	40051553	TAGGGAAAGAGCCCTTTTATAGCCCACCGTAGTGGTGGGTGACTGGCCTC
6370315	0.043358	0.00566608	1.20766	up	HLA-DRB5	3127	Homo sapiens major histocompatibility complex, class II, DR beta 5 (HLA-DRB5), mRNA.	GO:0002504|GO:0006955	GO:0016020|GO:0016021|GO:0042613		chr6	32593374	32593423	GGCTCTTATTCTTCCACAAGAGAGGACTTTCTCAGGCCCTGGTTGCTACC
6110215	0.0146017	0.00127005	1.30216	up	C12orf76	400073	Homo sapiens chromosome 12 open reading frame 76 (C12orf76), mRNA.				chr12	110479652	110479701	ATGCGCTGGTTGCAAAGTGGTGTCAGCTGTGGGGATCTTGGGCCCTCGTT
2510181	0.000606121	1.88791e-05	1.3753	up	C12orf76	400073	Homo sapiens chromosome 12 open reading frame 76 (C12orf76), mRNA.				chr12	110479316	110479365	CCCAGCCAACAGAAGTGCATGTCCACTGTGCGGGCCAGTGTGTGTTTACA
6590484	0.0405876	0.00518069	1.29532	down	NAP1L1	4673	Homo sapiens nucleosome assembly protein 1-like 1 (NAP1L1), transcript variant 1, mRNA.	GO:0006334|GO:0006260|GO:0006334|GO:0008284	GO:0005634|GO:0005634|GO:0005678|GO:0042470	GO:0005515	chr12	74728256	74728305	ACTAGTTTTTCTGCCAGCTATGTTGAATGCACAAATTCTGTCACGCATGT
5420309	1.00143e-07	2.91761e-10	1.88616	down	AURKA	6790	Homo sapiens aurora kinase A (AURKA), transcript variant 3, mRNA.	GO:0000278|GO:0006468|GO:0007051|GO:0007067|GO:0031647|GO:0048015|GO:0006468|GO:0000278|GO:0006468|GO:0000278|GO:0000278|GO:0000278|GO:0006468|GO:0000278|GO:0006468	GO:0005634|GO:0005813|GO:0005819	GO:0000166|GO:0004674|GO:0005515|GO:0005515|GO:0005515|GO:0005524|GO:0016740|GO:0031625|GO:0000166|GO:0004674|GO:0005524|GO:0016740|GO:0000166|GO:0004672|GO:0005524|GO:0031625|GO:0016301|GO:0031625|GO:0016301|GO:0031625|GO:0004672|GO:0005524|GO:0031625|GO:0000166|GO:0004674|GO:0005524|GO:0016740|GO:0031625	chr20	54944646	54944695	TCCTTTAGGAATGCTGTGTGTCTGTCCGGCACCCCGGTAGGCCTGATTGG
6900241	0.017405	0.00162267	1.25135	up	ABCB9	23457	Homo sapiens ATP-binding cassette, sub-family B (MDR/TAP), member 9 (ABCB9), transcript variant 2, mRNA.	GO:0006857|GO:0007283|GO:0015031	GO:0005765|GO:0005783|GO:0005789|GO:0016020|GO:0016021|GO:0043190	GO:0000166|GO:0005215|GO:0005524|GO:0015198|GO:0016887|GO:0042626	chr12	121979521	121979570	AGCCCAGGATCTGGCTTTGCCAGAGGTTGCAACATGTTGAGAGAACCCGG
4120278	5.59945e-06	4.3602e-08	1.65425	down	KIF23	9493	Homo sapiens kinesin family member 23 (KIF23), transcript variant 2, mRNA.	GO:0007018|GO:0000022|GO:0007018|GO:0007049|GO:0007067|GO:0051301	GO:0005874|GO:0005875|GO:0005634|GO:0005654|GO:0005819|GO:0005871|GO:0005874	GO:0000166|GO:0003777|GO:0005524|GO:0000166|GO:0003777|GO:0005515|GO:0005515|GO:0005515|GO:0005524	chr15	67526297	67527196	CAGCTGGGACCTGGATATCAGCATCACGCACAACCCAAGCGCAAAAAGCC
70601	0.033673	0.00400909	1.2224	down	CUL1	8454	Homo sapiens cullin 1 (CUL1), mRNA.	GO:0000082|GO:0006511|GO:0006915|GO:0007050|GO:0008285|GO:0008629|GO:0009887|GO:0051437	GO:0005654|GO:0005829|GO:0005829|GO:0019005	GO:0005515|GO:0031625	chr7	148128814	148128863	CGCCATTTACCCTAATTTAAGAACAGCGGGGACTGACCCTCCGTGCCGAG
2070367	0.0264992	0.00289628	1.23363	up	SERTAD2	9792	Homo sapiens SERTA domain containing 2 (SERTAD2), mRNA.	GO:0030308|GO:0045893	GO:0005634|GO:0005737	GO:0003713|GO:0005515	chr2	64712412	64712461	GGAGGTATAACCTTTCCCCCACAGACCTGAGAGCTGTGCCTTTTCTATGC
6290608	0.0203431	0.00200328	1.24443	up	FYTTD1	84248	Homo sapiens forty-two-three domain containing 1 (FYTTD1), transcript variant 1, mRNA.				chr3	198993111	198993160	CCTGAAGGAACAAAGAGCCACTCTCACATACAACAAAGGGGGAAGCCGCT
4200703	0.00189959	8.73422e-05	1.43593	down	CDC42BPB	9578	Homo sapiens CDC42 binding protein kinase beta (DMPK-like) (CDC42BPB), mRNA.	GO:0006468|GO:0007010|GO:0007163|GO:0007242|GO:0031532|GO:0051056	GO:0005737|GO:0005856|GO:0005911|GO:0031252	GO:0000166|GO:0000287|GO:0004674|GO:0005083|GO:0005524|GO:0008270|GO:0016740|GO:0019992|GO:0042802	chr14	103399032	103399081	CCCTTTGTACCAGATGTTGAGTGACCAGCTCTGTGGCCCTGTGTCGTCAG
6420731	0.0343835	0.00412718	1.21581	down	SLC20A1	6574	Homo sapiens solute carrier family 20 (phosphate transporter), member 1 (SLC20A1), mRNA.	GO:0006796|GO:0006810|GO:0006817|GO:0043123	GO:0005887|GO:0016020	GO:0004872|GO:0005315|GO:0005436|GO:0015293	chr2	113137447	113137496	CATGCTCTGCGTTGTTGGTTTCACCAGCTTCTGCCCTCACATGCACAGGG
4060707	0.0399556	0.00505636	1.25132	up	GSTM4	2948	Homo sapiens glutathione S-transferase M4 (GSTM4), transcript variant 1, mRNA.	GO:0008152|GO:0008152|GO:0008152	GO:0005737	GO:0004364|GO:0004364|GO:0004364|GO:0016740	chr1	110000326	110000375	CTGCTCCGTGCCTCCCGCGCCTGTTGGTTGGAAGTGACGACCTTGAAGAT
1340739	0.0255406	0.00275727	1.28974	up	FAM160B1	57700	Homo sapiens family with sequence similarity 160, member B1 (FAM160B1), transcript variant 1, mRNA.				chr10	116624309	116624358	CCAGCGTCTGGAATTCTTGGTCCCTCCGTGGAGAAACTCTTCAGATGGTC
4590370	1.37314e-06	7.41923e-09	1.76571	up	SLC2A1	6513	Homo sapiens solute carrier family 2 (facilitated glucose transporter), member 1 (SLC2A1), mRNA.	GO:0055085|GO:0008643|GO:0055085|GO:0008643|GO:0015758|GO:0055085	GO:0016020|GO:0016021|GO:0016020|GO:0016021|GO:0005622|GO:0005624|GO:0005737|GO:0005886|GO:0016021|GO:0016323|GO:0042470	GO:0005215|GO:0022891|GO:0005215|GO:0005351|GO:0005355|GO:0022891|GO:0005215|GO:0005351|GO:0005355|GO:0005515|GO:0022891	chr1	43164575	43164624	AGGGCCTGTGGGAGCCTGCAAACTCACTGCTCAAGAAGACATGGAGACTC
5260014	6.48118e-05	1.07802e-06	1.5795	down	CDKN3	1033	Homo sapiens cyclin-dependent kinase inhibitor 3 (CDK2-associated dual specificity phosphatase) (CDKN3), mRNA.	GO:0000079|GO:0000082|GO:0007049|GO:0007050|GO:0008285|GO:0016311		GO:0004722|GO:0004725|GO:0005515|GO:0008138|GO:0016787	chr14	53948082	53948131	CGCAGATGGAGGGACTCCTGACATAGCCAGCTGCTGTGAAATAATGGAAG
6590201	0.00934493	0.000707852	1.27666	up	ATP6AP1	537	Homo sapiens ATPase, H+ transporting, lysosomal accessory protein 1 (ATP6AP1), mRNA.	GO:0015986|GO:0015986|GO:0006811|GO:0015986|GO:0015992	GO:0016021|GO:0016469|GO:0016021|GO:0016469|GO:0005773|GO:0005774|GO:0016020|GO:0016021|GO:0016469	GO:0046933|GO:0046961|GO:0046933|GO:0046961|GO:0000166|GO:0005215|GO:0005524|GO:0016787|GO:0046872|GO:0046933|GO:0046961	chrX	153317985	153318034	CGGGAGTGCCGGGCAGGAGCATGGGGTGCTTGGTTGTTTCCTTCCTAATA
580332	0.0419643	0.00541059	1.24978	down	SLC41A1	254428	Homo sapiens solute carrier family 41, member 1 (SLC41A1), mRNA.	GO:0006812	GO:0005886|GO:0016021	GO:0000287|GO:0008324	chr1	205758441	205758490	AGGCCCTGAGTGAGCAGAGGAGGACTGTAGGGTGAGAGGGAAAGAAAATG
5270437	0.00990044	0.000765163	1.36983	up	GPR115	221393	Homo sapiens G protein-coupled receptor 115 (GPR115), mRNA.	GO:0007165|GO:0007218	GO:0005886|GO:0016021	GO:0004872|GO:0004930	chr6	47682719	47682768	GTTGCTGTCAACACTCAGAGGCCCTCTATTGGCAGTTCCAAGTCTCAGGA
4850521	0.00452743	0.000270044	1.32626	down	NUP35	129401	Homo sapiens nucleoporin 35kDa (NUP35), mRNA.	GO:0015031|GO:0051028|GO:0065002	GO:0005634|GO:0005635|GO:0005643		chr2	183732509	183732558	GCCTTTACACCACCAATCAAAACTCTAGGTACACCAACACAACCTGGAAG
4250451	0.00484264	0.000294488	1.37761	down	SEC24D	9871	Homo sapiens SEC24 related gene family, member D (S. cerevisiae) (SEC24D), mRNA.	GO:0006886|GO:0006888|GO:0006888|GO:0016044|GO:0016192|GO:0006886|GO:0006888|GO:0016192	GO:0000139|GO:0005737|GO:0005783|GO:0005789|GO:0005794|GO:0016020|GO:0030127|GO:0005794|GO:0016020|GO:0030127	GO:0003674|GO:0005515|GO:0008270|GO:0005515|GO:0008270	chr4	119863949	119863998	CCAGGAAGAGATGGCATTTAGAACTTCAGCTTTGGTGCTCAGGTATAAAG
3120086	0.00121728	4.75874e-05	1.36818	down	PDSS1	23590	Homo sapiens prenyl (decaprenyl) diphosphate synthase, subunit 1 (PDSS1), mRNA.	GO:0006744|GO:0008299|GO:0051290		GO:0000010|GO:0016740|GO:0046982|GO:0050347	chr10	27026747	27031117	CAGTAAACTTCGACCATCCCCAGAAAGAGATGCCCTCATTCAGCTTTCAG
430192	0.00421502	0.000246721	1.39607	down	PDSS1	23590	Homo sapiens prenyl (decaprenyl) diphosphate synthase, subunit 1 (PDSS1), mRNA.	GO:0006744|GO:0008299|GO:0051290		GO:0000010|GO:0016740|GO:0046982|GO:0050347	chr10	27026627	27026676	GCGACGGTTCAGTTTGCCTGGAGATGTAGACAGAGCTCGACAGTATGTAC
20347	0.00855636	0.000631824	1.33523	up	TRADD	8717	Homo sapiens TNFRSF1A-associated via death domain (TRADD), mRNA.	GO:0006915|GO:0006917|GO:0007165|GO:0008633|GO:0043123|GO:0051798	GO:0005737|GO:0005829|GO:0005829|GO:0005856	GO:0004871|GO:0019215|GO:0042802	chr16	67190462	67190511	TTTGTGGAGTCCTCGCTGGACAAGGTGGTCCTGTCGGATGCCTACGCGCA
4010075	0.010363	0.000815182	1.29893	down	XPR1	9213	Homo sapiens xenotropic and polytropic retrovirus receptor (XPR1), mRNA.	GO:0007186	GO:0005886|GO:0005887	GO:0004930	chr1	179121771	179121820	CTTTGTGCTTCTATTGCTTTTTTGTGTTTTGTTAAGCATGTCCCTTGGCC
5290246	0.00173178	7.7434e-05	1.36676	down	XPR1	9213	Homo sapiens xenotropic and polytropic retrovirus receptor (XPR1), mRNA.	GO:0007186	GO:0005886|GO:0005887	GO:0004930	chr1	179121561	179121610	CACTTCCACCATGTATTACAAGTCTTGACCCATCCCTGTCGTAACTCCAG
7040670	0.0417341	0.00536985	1.20397	up	DHRS3	9249	Homo sapiens dehydrogenase/reductase (SDR family) member 3 (DHRS3), mRNA.	GO:0007601|GO:0042572|GO:0055114|GO:0055114	GO:0016020|GO:0016021	GO:0000166|GO:0009055|GO:0016491|GO:0005488|GO:0016491	chr1	12628133	12628182	TGACCCCCACAGGGAGGCAGGAAAACAGCCAGAAGCCACCTTGACACTTT
620008	5.59095e-05	8.70717e-07	1.57902	up	M6PRBP1	10226	Homo sapiens mannose-6-phosphate receptor binding protein 1 (M6PRBP1), mRNA.	GO:0016192	GO:0005737|GO:0005768|GO:0005794|GO:0005811|GO:0010008|GO:0016020|GO:0034430		chr19	4789506	4789555	TTGTTTACACCGATGTCCCTGAATATCAGCCTGTAGCTAATGGACTTGGG
4220044	0.0134192	0.00113948	1.26818	up	SLC15A3	51296	Homo sapiens solute carrier family 15, member 3 (SLC15A3), mRNA.	GO:0006857|GO:0015031|GO:0006857	GO:0005765|GO:0016020|GO:0016021|GO:0016020	GO:0005215|GO:0015198|GO:0015293|GO:0005215	chr11	60461216	60461265	ACAGGCCCTATTCCAGCCCCCTTGCTTCACTCTACCGGACAGACGGCAGC
610022	0.00398217	0.000229716	1.4146	down	BFAR	51283	Homo sapiens bifunctional apoptosis regulator (BFAR), mRNA.	GO:0006915|GO:0006916	GO:0005624|GO:0005783|GO:0005789|GO:0005887|GO:0016020	GO:0005198|GO:0005515|GO:0008270|GO:0046872	chr16	14669840	14669889	GGATCCCTTTCTCTGAATGGAGAGATTGAGAGGGATGTCGGGCAGTTCCC
2000661	0.000592658	1.82714e-05	1.41511	down	NCAPH2	29781	Homo sapiens non-SMC condensin II complex, subunit H2 (NCAPH2), transcript variant 2, mRNA.	GO:0007076	GO:0005634		chr22	49308446	49308563	GGCCTCCCTGCAGCTGGCCAATGACTACACAGTGGAGATAACCCAGCAGC
2070224	1.08103e-06	5.55459e-09	1.86678	down	BUB1	699	Homo sapiens BUB1 budding uninhibited by benzimidazoles 1 homolog (yeast) (BUB1), mRNA.	GO:0006468|GO:0007049|GO:0007067|GO:0007094|GO:0008283|GO:0051301	GO:0000777|GO:0005634|GO:0005816	GO:0000166|GO:0004674|GO:0005524|GO:0016740	chr2	111112194	111113825	AGGAGGAGAGTGTAAGCCTGAAGGTCTTTTTAGAAGGCTTCCTCATTTGG
3460133	0.000353352	9.30337e-06	1.48016	down	PAK2	5062	Homo sapiens p21 (CDKN1A)-activated kinase 2 (PAK2), mRNA.	GO:0001558|GO:0006469|GO:0006915|GO:0007165|GO:0044419|GO:0046777	GO:0005634|GO:0005737|GO:0005829|GO:0016020	GO:0000166|GO:0004674|GO:0005524|GO:0016740|GO:0042802	chr3	198043374	198043423	CCGAAGTCTTTCCCATTCACTTCTCTAGAAAGCTGCCAAGACAGAGGCAG
5080692	0.00039428	1.06935e-05	1.56896	up	HLA-A29.1	649853	Homo sapiens major histocompatibility complex class I HLA-A29.1 (HLA-A29.1), mRNA. XM_001132736 XM_001132742 XM_001132747 XM_001132750 XM_001132753 XM_001132757 XM_001132760 XM_001132769 XM_001132772 XM_001132776 XM_001132779 XM_001132781 XM_001132783 XM_001132785 XM_001132794							ACGGACGCCCCCAAGACGCATATGACTCACCACGCTGTCTCTGACCATGA
5310280	0.00169645	7.42275e-05	1.57743	up	TMTC1	83857	Homo sapiens transmembrane and tetratricopeptide repeat containing 1 (TMTC1), mRNA.		GO:0016020|GO:0016021	GO:0005488	chr12	29655640	29655689	CCTTACCTGGGGCAAGTTAGCCATTGTCTCCCAGTCATGTTTACCACCCA
3130379	2.41288e-05	2.95252e-07	1.53831	down	STX8	9482	Homo sapiens syntaxin 8 (STX8), mRNA.	GO:0006810	GO:0005634|GO:0005737|GO:0005783|GO:0005794|GO:0005886|GO:0005887		chr17	9419890	9419939	GCCAGAGGAGACCAGAGGCTTGGGTTTTGATGAAATCCGGCAACAGCAGC
6760189	0.0281691	0.00315444	1.30794	down	CDC5L	988	Homo sapiens CDC5 cell division cycle 5-like (S. pombe) (CDC5L), mRNA.	GO:0006355|GO:0006397|GO:0007049|GO:0008380	GO:0005634|GO:0005681|GO:0005730|GO:0005737|GO:0016607	GO:0003677|GO:0003723|GO:0005515|GO:0005515|GO:0005515	chr6	44413590	44414378	CCCCGGAGGCTAGAGTGTCTAAAAGAAGACGTTCAGCGACAACAAGAAAG
2260577	0.00173641	7.79352e-05	1.3921	down	RUSC2	9853	Homo sapiens RUN and SH3 domain containing 2 (RUSC2), mRNA.		GO:0005737		chr9	35551717	35551766	GGTGGAGATGAGGATGGGTAACAGTATTGGGGCCAGATCCCTAAGCCCCC
5670440	0.00025586	6.0448e-06	1.4249	up	TNFRSF9	3604	Homo sapiens tumor necrosis factor receptor superfamily, member 9 (TNFRSF9), mRNA.	GO:0006917|GO:0008285	GO:0005887|GO:0016020	GO:0004872|GO:0009055	chr1	7979975	7980024	TCTCCATCCTCACACCTTCTGCCTTTGTCCTGCTCCCTTTTAAGCCAGGT
2000592	0.0403877	0.00513243	1.24194	up	FTHL8	2501	Homo sapiens ferritin, heavy polypeptide-like 8 (FTHL8) on chromosome X.				chrX	146941934	146941983	CGACAAGCACACCCCGGGGAGACAGTGACAATGAAAGGTAAGCCTCAGGC
3180521	0.00645347	0.000427656	1.38801	up	SPRYD3	84926	Homo sapiens SPRY domain containing 3 (SPRYD3), mRNA.				chr12	53458439	53458488	CTGCTGGGCCTCCCTTTGGCCCTCGCTTCCCACCCTACGATGTATGAAAT
5960343	0.00707629	0.000487671	1.27788	up	PRIC285	85441	Homo sapiens peroxisomal proliferator-activated receptor A interacting complex 285 (PRIC285), transcript variant 2, mRNA.	GO:0006350|GO:0006355	GO:0005622|GO:0005634	GO:0000166|GO:0003677|GO:0003713|GO:0003723|GO:0004386|GO:0004540|GO:0005524|GO:0008270|GO:0016787|GO:0017111|GO:0046872	chr20	61660011	61660060	AGCCTGCTCGGCTGTATGTTTCTCGCACGCTCACCCGCTTCAGTGCGGCT
1990767	0.00307923	0.000163601	1.35097	down	RAB28	9364	Homo sapiens RAB28, member RAS oncogene family (RAB28), transcript variant 1, mRNA.	GO:0007264|GO:0007264	GO:0005886	GO:0000166|GO:0005525|GO:0000166|GO:0003924|GO:0005525	chr4	12979199	12979248	GCTGCCCTTCACCTCTGGGTGGGCCCGAGGACTTCTAGGAACTTGTTTTA
1230070	0.000250273	5.85976e-06	1.50164	up	NDRG1	10397	Homo sapiens N-myc downstream regulated gene 1 (NDRG1), mRNA.	GO:0010038|GO:0045576	GO:0005634|GO:0005737|GO:0005856|GO:0005886	GO:0005515|GO:0031177	chr8	134318696	134318745	CTTCCCTGGCCTTGAGTAGAAAAGTCGGGGATCGGGGCAAGAGAGGCTGA
3290739	0.00655711	0.000438345	1.38141	up	ARL2	402	Homo sapiens ADP-ribosylation factor-like 2 (ARL2), mRNA.	GO:0007021|GO:0007264	GO:0005622	GO:0000166|GO:0005095|GO:0005515|GO:0005525	chr11	64546180	64546229	GCTGTGGGCCTCATCCTTCACTCAGTTGTGAAATAAACCGCTCCTTGCCC
1820307	0.0183716	0.00174446	1.23249	down	C19orf29	58509	Homo sapiens chromosome 19 open reading frame 29 (C19orf29), transcript variant 1, mRNA.	GO:0006397|GO:0008150|GO:0008380	GO:0005634|GO:0005681	GO:0005515	chr19	3610842	3610891	CCGACGGGAACATCTCCAACAGAAGCAAAACGGAAAGTGCCTCCCGGACC
4060468	0.0411408	0.00526519	1.20808	down	CENPL	91687	Homo sapiens centromere protein L (CENPL), mRNA.		GO:0000775|GO:0005634|GO:0005694		chr1	172036047	172036096	TCCCCACCATGCCTTTGGAGTTGCCAAGATGGAAGCCAAGAAGGATCTAG
2510692	0.0120146	0.00098647	1.40065	up	U1SNRNPBP	11066	Homo sapiens U11/U12 snRNP 35K (U1SNRNPBP), transcript variant 4, mRNA.	GO:0006397|GO:0008380	GO:0005634|GO:0005681	GO:0000166|GO:0003723	chr12	122516276	122516325	GCTTCGGCTGGTCAGGGACTTGGTCACAGGTTTTTCAAAGGGCTACGCCT
3710647	5.73191e-08	1.12343e-10	2.07681	up	MXD4	10608	Homo sapiens MAX dimerization protein 4 (MXD4), mRNA.	GO:0000122|GO:0006355|GO:0008285|GO:0016481	GO:0005634	GO:0003677|GO:0003714|GO:0005515|GO:0030528	chr4	2249182	2249231	GGCCACCTGTCCACCGTGTGGGCCGTGCTGTGTCCTTATGTCATTGTAAT
2490066	0.016018	0.00144282	1.24787	up	CD2BP2	10421	Homo sapiens CD2 (cytoplasmic tail) binding protein 2 (CD2BP2), mRNA.	GO:0000398	GO:0005737	GO:0005515	chr16	30271746	30271795	GCCCAGTTTGGTGGGCCCTTCTTTCCTGGACTTTGTGGAGGAGGCACCAA
3290475	0.000657453	2.09307e-05	1.37392	down	NFYC	4802	Homo sapiens nuclear transcription factor Y, gamma (NFYC), mRNA.	GO:0006350|GO:0006357|GO:0006457	GO:0005622|GO:0005622|GO:0005622|GO:0005622|GO:0005622|GO:0005634|GO:0016602	GO:0043565|GO:0043565|GO:0043565|GO:0043565|GO:0003700|GO:0003700|GO:0003702|GO:0003713|GO:0005515|GO:0043565	chr1	41009504	41009553	GGAACAGCTGCTACCCCCAAGACTTGCCACGTTGTTCTGCCCTCAGATGG
1780661	0.00315061	0.000168562	1.31369	up	MAN1B1	11253	Homo sapiens mannosidase, alpha, class 1B, member 1 (MAN1B1), mRNA.	GO:0006487|GO:0008152|GO:0009311|GO:0006644|GO:0006952|GO:0016042	GO:0005624|GO:0005783|GO:0005789|GO:0016020|GO:0016021|GO:0016020|GO:0016020	GO:0004571|GO:0005509|GO:0016798|GO:0004571|GO:0004623|GO:0005509|GO:0004571|GO:0005509	chr9	139123304	139123353	CAGGGCTGGCTCTGGTGTTTACAAGCTGGACTCAGGGATCCTCCTGGCCG
5090215	0.00202296	9.48192e-05	1.34313	up	IFI6	2537	Homo sapiens interferon, alpha-inducible protein 6 (IFI6), transcript variant 3, mRNA.	GO:0001836|GO:0006916|GO:0006955|GO:0043154|GO:0051902	GO:0005634|GO:0005739|GO:0016020|GO:0016021	GO:0005515	chr1	27992615	27992664	TGCGCCGACGATGCCCAGAATCCAGAACTTTGTCTATCACTCTCCCCAAC
5360070	3.42815e-06	2.43337e-08	1.82874	down	CCNB2	9133	Homo sapiens cyclin B2 (CCNB2), mRNA.	GO:0007049|GO:0007067|GO:0051301	GO:0005634|GO:0005829|GO:0015630	GO:0005515	chr15	57204299	57204348	CAGCATGATCCCTCAGCTGAACTCAAAAGCCGTCAAAGACCTTGCCTCCC
2000010	0.00174415	7.8532e-05	1.35607	down	POLE	5426	Homo sapiens polymerase (DNA directed), epsilon (POLE), mRNA.	GO:0000082|GO:0000731|GO:0006139|GO:0006297	GO:0005634|GO:0005654|GO:0005654	GO:0000166|GO:0003677|GO:0003682|GO:0003887|GO:0005515|GO:0008270|GO:0016740|GO:0016779|GO:0046872	chr12	133200609	133200658	GCCTCAGGAAAACAAGACCTCTGTGCACCTCACTTTTGGCTCACTGCAGC
3290672	0.00286939	0.000148652	1.4381	down	DULLARD	23399	Homo sapiens dullard homolog (Xenopus laevis) (DULLARD), mRNA.	GO:0006998	GO:0005634|GO:0005783|GO:0005789|GO:0016020|GO:0016021|GO:0031965	GO:0004722|GO:0016787	chr17	7088034	7088083	TCCACTTGGAGTCTGGATGGACACATGGGCCAGGGGCTCTGAAGCAGCCT
6280242	0.014086	0.00120803	1.2528	down	DUT	1854	Homo sapiens deoxyuridine triphosphatase (DUT), nuclear gene encoding mitochondrial protein, transcript variant 1, mRNA.	GO:0046080|GO:0006139|GO:0006260|GO:0009117|GO:0046080	GO:0005739|GO:0005634|GO:0005739|GO:0005739|GO:0005829	GO:0004170|GO:0016787|GO:0000287|GO:0004170|GO:0004170|GO:0016787	chr15	46422761	46422810	GAAATCAACTCAGTGGGACATAGCCAGCATTTTTGCATACCAGGTTGGGC
2140360	1.98959e-06	1.23447e-08	1.74301	down	INF2	64423	Homo sapiens inverted formin, FH2 and WH2 domain containing (INF2), transcript variant 3, mRNA.	GO:0016043|GO:0030036	GO:0005634|GO:0005737|GO:0005783	GO:0003779|GO:0017048	chr14	104241753	104241802	TGTTCGTCGCTACTTGGTGTCAGGCCCACTAGAACAAGGGTCCCCAACCG
5130241	0.00245794	0.000120436	1.33205	down	PPIH	10465	Homo sapiens peptidylprolyl isomerase H (cyclophilin H) (PPIH), mRNA.	GO:0006397|GO:0006457|GO:0006461|GO:0006608|GO:0008380|GO:0006457	GO:0005634|GO:0005681|GO:0005737|GO:0016607	GO:0003755|GO:0016018|GO:0016853|GO:0003755|GO:0003755|GO:0016853	chr1	42905641	42905690	GCTACCTGTGGTGATCTCGCAGTGTGGGGAGATGTAGTCCAGACAAAGAC
4050070	0.00746025	0.000525197	1.51442	up	UBE2E1	7324	Homo sapiens ubiquitin-conjugating enzyme E2E 1 (UBC4/5 homolog, yeast) (UBE2E1), transcript variant 1, mRNA.	GO:0006511|GO:0043687|GO:0051246|GO:0006511|GO:0031145|GO:0032020|GO:0051246|GO:0051436|GO:0051436|GO:0051437	GO:0005654|GO:0005654|GO:0005654|GO:0005829|GO:0005829|GO:0005829|GO:0005829|GO:0005829	GO:0016874|GO:0019787|GO:0004842|GO:0005515|GO:0016874|GO:0042296	chr3	23823865	23823914	GTAAAGTCAGCATGAGCAAAAACTCCAAACTCCTCTCCACCAGCGCCAAG
7610121	0.00796901	0.000571567	1.29094	up	FAM120B	84498	Homo sapiens family with sequence similarity 120B (FAM120B), mRNA.	GO:0006350|GO:0006355|GO:0030154	GO:0005634		chr6	170555940	170555989	AGAGCTTTTGTTGGCTTCTCTCCCGAGCTTGTGCCTGATTCTGTGGCCCA
1780563	0.000333446	8.549e-06	1.72042	down	TNRC6A	27327	Homo sapiens trinucleotide repeat containing 6A (TNRC6A), mRNA.		GO:0005737	GO:0000166|GO:0003723	chr16	24742840	24742889	ATGAGCTTTTCCCTTTGCACTGAATGATGTTCTCTCCGTCTCATCGGCAG
6400356	2.30875e-05	2.76395e-07	1.53293	down	GAS2L3	283431	Homo sapiens growth arrest-specific 2 like 3 (GAS2L3), mRNA.	GO:0007050			chr12	99542644	99542693	GGGCCTCCCAGAAGTGGCAAAACCCCAGCTTCAATCAGGAAACCACCCTC
290332	0.000532401	1.6047e-05	1.51115	up	TAF13	6884	Homo sapiens TAF13 RNA polymerase II, TATA box binding protein (TBP)-associated factor, 18kDa (TAF13), mRNA.	GO:0006350|GO:0006355|GO:0006367|GO:0006368	GO:0005634|GO:0005654|GO:0005654|GO:0005654|GO:0005669	GO:0003700|GO:0005515|GO:0016251	chr1	109617677	109618581	GCGTGCTAGTGGGATGGCAGATGAGGAAGAAGACCCCACGTTTGAGGAAG
4150553	1.31283e-05	1.3074e-07	1.58819	up	TAF13	6884	Homo sapiens TAF13 RNA polymerase II, TATA box binding protein (TBP)-associated factor, 18kDa (TAF13), mRNA.	GO:0006350|GO:0006355|GO:0006367|GO:0006368	GO:0005634|GO:0005654|GO:0005654|GO:0005654|GO:0005669	GO:0003700|GO:0005515|GO:0016251	chr1	109617679	109618583	TGGCGTGCTAGTGGGATGGCAGATGAGGAAGAAGACCCCACGTTTGAGGA
2030327	0.0335909	0.00399468	1.22052	up	DKFZP564O0523	84060	Homo sapiens hypothetical protein DKFZp564O0523 (DKFZP564O0523), mRNA.				chr7	92001965	92002014	AACTCAGTGGCCTGCCCTGGTGCACAAAAGGCTATTACGTCTTCAGAGGC
1300671	0.0232398	0.00240982	1.22254	up	NCOA4	8031	Homo sapiens nuclear receptor coactivator 4 (NCOA4), mRNA.	GO:0006350|GO:0007169|GO:0008584|GO:0030521|GO:0045893	GO:0005634	GO:0004872|GO:0004872|GO:0003713|GO:0005515|GO:0050681	chr10	51260567	51260616	AGGAGCCTTTCCAGTTATCTTGAGTTGCAGCTCTGTAGTTTCTTGAGGCC
7330259	0.0257868	0.00279751	1.2563	up	SH3GLB2	56904	Homo sapiens SH3-domain GRB2-like endophilin B2 (SH3GLB2), mRNA.		GO:0005737	GO:0005515	chr9	131770381	131770430	AGCTCAAGCCAAGTCCAGCGGCCGCAGTCTTCACCTCTCCACACTCACTT
2630053	0.033673	0.00401271	1.28505	up	COL4A3BP	10087	Homo sapiens collagen, type IV, alpha 3 (Goodpasture antigen) binding protein (COL4A3BP), transcript variant 1, mRNA.	GO:0006468|GO:0006869|GO:0006955	GO:0005575|GO:0005737|GO:0005783|GO:0005794	GO:0004672|GO:0005515|GO:0033868	chr5	74730910	74730959	TCGCTCTTCCTCCATGTCTTCCATTGATCTAGTCAGTGCCTCTGATGATG
3890167	0.0183716	0.00174568	1.37138	up	SLC39A3	29985	Homo sapiens solute carrier family 39 (zinc transporter), member 3 (SLC39A3), transcript variant 1, mRNA.	GO:0006811|GO:0006829|GO:0030001	GO:0016020|GO:0016021	GO:0005385|GO:0008270|GO:0046873	chr19	2737138	2737187	CCCTGCTCCCCGTGAAGATCATCGAGACAGATTTTGAGAAGGCCCATCGC
1090370	0.0151503	0.00132981	1.24239	down	UCHL5IP	55559	Homo sapiens UCHL5 interacting protein (UCHL5IP), transcript variant 1, mRNA.	GO:0042177|GO:0043161	GO:0005575|GO:0005622|GO:0005634|GO:0005730|GO:0005737|GO:0005886	GO:0031996	chrX	152366416	152366465	GATCGAGTTGGCCGAGGATGGATGATTGTGGCAGCAGAAGCCGTTGCAGC
6400722	0.00880975	0.000658934	1.27462	down	HMGXB4	10042	Homo sapiens HMG box domain containing 4 (HMGXB4), transcript variant 1, mRNA.				chr22	34021218	34021267	CCCCACCAGTGTTGTCACAGGGCTATGTTGCTTAAAGGTAGTCTGGCTGC
6110095	0.0153765	0.00136106	1.26182	down	CCDC15	80071	Homo sapiens coiled-coil domain containing 15 (CCDC15), mRNA.				chr11	124378992	124379041	CAGGATTGAGCACTGAATTCCAAGCTCCACTGGCATTTCAGTCTGACGTG
6980382	5.62037e-06	4.40626e-08	1.60962	down	GTSE1	51512	Homo sapiens G-2 and S-phase expressed 1 (GTSE1), mRNA.	GO:0000085|GO:0006977|GO:0007017	GO:0005737|GO:0005881	GO:0003674	chr22	45108031	45108080	CTCTTATCTACCTATGACCTGCGAGCTGCCCACCACCCCCAGTTGTTGCG
3520278	0.0014052	5.72411e-05	1.35215	up	GALK1	2584	Homo sapiens galactokinase 1 (GALK1), mRNA.	GO:0006012|GO:0019402|GO:0046835|GO:0006012|GO:0008152|GO:0046835	GO:0005737|GO:0005794|GO:0005624|GO:0005737|GO:0005794|GO:0005829	GO:0000166|GO:0004335|GO:0005515|GO:0005524|GO:0016301|GO:0016740|GO:0000166|GO:0004335|GO:0004335|GO:0004335|GO:0005524|GO:0005534|GO:0016301|GO:0016740	chr17	73754026	73754075	GTGCCCGGTGCCATCTTCCATATCCGGGTGCTCAATAAACTTGTGCCTCC
1820543	9.71205e-05	1.80577e-06	1.51051	up	ZNF428	126299	Homo sapiens zinc finger protein 428 (ZNF428), mRNA.		GO:0005622	GO:0008270|GO:0046872	chr19	48803470	48803519	GATGGGGTACTGCCGGTCTGTGTTGTCTTAGAAGTAGATGTGTGATGGCC
4060576	0.0240008	0.00253383	1.23543	up	SLC35D2	11046	Homo sapiens solute carrier family 35, member D2 (SLC35D2), mRNA.	GO:0008150|GO:0008643	GO:0000139|GO:0005575|GO:0005794|GO:0016020|GO:0016021	GO:0005338|GO:0005351	chr9	98123042	98123091	AGCCCCAGCTGCTCTTCTAGGGACCTATGGGGCCTTCGTGGCATCTCTGT
6840215	5.62562e-05	8.82726e-07	1.71474	down	ECT2	1894	Homo sapiens epithelial cell transforming sequence 2 oncogene (ECT2), mRNA.	GO:0007242|GO:0035023|GO:0043123|GO:0007242|GO:0035023	GO:0005622|GO:0005622	GO:0004871|GO:0005085|GO:0005089|GO:0005515|GO:0005085|GO:0005089	chr3	172539161	172539210	CTATGCCATGTATGTGCCACTTCTGAGAGTAGTAAATGACTCTTTGCTAC
6840246	0.008111	0.000586907	1.41914	up	CTSA	5476	Homo sapiens cathepsin A (CTSA), transcript variant 1, mRNA.	GO:0006508|GO:0006508|GO:0006508|GO:0006886	GO:0005739|GO:0005739|GO:0005764|GO:0005783	GO:0004185|GO:0005515|GO:0004185|GO:0004185|GO:0005515|GO:0008047|GO:0008233	chr20	43960481	43960530	CAAGCAGCCATACTGATGACCACAGCAACCAGCTCCACGGCCTGATGCAG
6200682	0.0233948	0.00243592	1.29588	up	CAPRIN2	65981	Homo sapiens caprin family member 2 (CAPRIN2), transcript variant 2, mRNA.	GO:0030308	GO:0005737|GO:0005739		chr12	30863283	30863332	GGACAAGGAGACTCCCGTAGCATGACCCCTGTGGATGTGCCAGTGACAAA
5490500	0.0148276	0.00129441	1.28705	down	AAGAB	79719	Homo sapiens alpha- and gamma-adaptin binding protein (AAGAB), mRNA.				chr15	67493540	67493589	CCACCAGCCCATCAGTGTTTCTTTGAGGTGATTGCATTAGGGAAGTTGGC
3450370	0.0197568	0.00192356	1.24565	down	NUDT15	55270	Homo sapiens nudix (nucleoside diphosphate linked moiety X)-type motif 15 (NUDT15), mRNA.			GO:0000287|GO:0016787|GO:0030145	chr13	47519105	47519154	AGGCTGAATGCAAAAGCAGATACAAGATTCCAGCTTTCGTCTGTCATCAG
3710609	0.00670951	0.000453153	1.33349	up	TSPAN17	26262	Homo sapiens tetraspanin 17 (TSPAN17), transcript variant 1, mRNA.	GO:0016567	GO:0000151|GO:0016020|GO:0016021	GO:0004842|GO:0005515	chr5	176018591	176018640	TCCTGGGCCCCTGACAGGCGCTGGCTGTGAGTGGTTTGTACATGCTACAA
510577	0.0324363	0.0038024	1.20953	up	TRIML2	205860	Homo sapiens tripartite motif family-like 2 (TRIML2), mRNA.				chr4	189249600	189249649	CTCCCATTGCGCCTTCCAAGGAGCTCTCAGGCCTGTGTTTTCCCTCTGTA
6280609	0.00736024	0.000512698	1.28035	down	TSGA14	95681	Homo sapiens testis specific, 14 (TSGA14), mRNA.		GO:0005813		chr7	130036725	130036774	CTTCCCTCCTTGTTCCGATTCTGCGTTCCCATCGTCAGACAACTTTGGAG
2600647	0.00185756	8.48193e-05	1.33405	down	TSGA14	95681	Homo sapiens testis specific, 14 (TSGA14), mRNA.		GO:0005813		chr7	130036897	130036946	CCACACTCAGCTTTCCCCTAGCATGGACAAGATTTTCAGCCATTTTTGCC
3990598	0.0265944	0.00291329	1.27459	down	DRAP1	10589	Homo sapiens DR1-associated protein 1 (negative cofactor 2 alpha) (DRAP1), mRNA.	GO:0000122|GO:0006350|GO:0006355	GO:0005622|GO:0005634	GO:0003700|GO:0003714|GO:0043565	chr11	65445458	65445507	GGACGAAGAAGATTACGACTCCTAGCGCCTTCTGCCCCCCAGACCATAGC
2190725	0.0355007	0.00431018	1.21322	up	RASA2	5922	Homo sapiens RAS p21 protein activator 2 (RASA2), mRNA.	GO:0007242|GO:0051056	GO:0005622|GO:0005737	GO:0005099|GO:0008270|GO:0046872	chr3	141327491	141328262	GCTGTCAGGAGACTGGTGAAAACACTCTCGGCTGCAAGCCATGTACTGCA
1850035	0.028119	0.00314436	1.30422	up	PPIA	5478	Homo sapiens peptidylprolyl isomerase A (cyclophilin A) (PPIA), mRNA.	GO:0006457|GO:0006457|GO:0019047|GO:0019059|GO:0044419|GO:0045069|GO:0045069	GO:0005576|GO:0005634|GO:0005737|GO:0005829|GO:0005829	GO:0003755|GO:0016853|GO:0042277|GO:0046790|GO:0051082	chr7	44808180	44808229	CAGAGGCAGGAAAAGCAAGGAGCCAGAATTAAGAGGTTGGGTCAGTCTGC
940202	0.0319693	0.0037341	1.24875	up	PPM1G	5496	Homo sapiens protein phosphatase 1G (formerly 2C), magnesium-dependent, gamma isoform (PPM1G), transcript variant 1, mRNA.	GO:0006470|GO:0007050	GO:0005634|GO:0005737|GO:0008287	GO:0000287|GO:0004722|GO:0016787|GO:0030145	chr2	27632393	27632442	TTACCGCCTCCTGGCCGGCCTCGCGCCTTTCACCGGCACCTTGCGTCGGT
1010168	0.0464302	0.00628152	1.23983	down	PSMG1	8624	Homo sapiens proteasome (prosome, macropain) assembly chaperone 1 (PSMG1), transcript variant 2, mRNA.	GO:0043248	GO:0005737|GO:0005783	GO:0005515	chr21	40550379	40550428	GCGTGTTGTCCATTGCTAGAACAACCGAATATAGTACACGACCTTCCTGC
4570358	0.00788168	0.000564051	1.30492	up	CNTNAP1	8506	Homo sapiens contactin associated protein 1 (CNTNAP1), mRNA.	GO:0006935|GO:0007155|GO:0007165|GO:0007204	GO:0005887|GO:0016020	GO:0004872|GO:0005070|GO:0005102|GO:0016493|GO:0017124	chr17	38105198	38105247	AGGAACCCTCTTTCCTCCGCTCAGAGATGCTGCTTCATTTACCCAGGAGG
1440753	5.2104e-05	7.99876e-07	1.51419	up	LOC550643	550643	Homo sapiens hypothetical LOC550643 (LOC550643), non-coding RNA.				chrX	56843886	56843935	TGCCTGTGAGATGGTCCTGCAGCAGCCAACCAGTGAACTCTTTTGGTGAC
1570523	0.0402801	0.00511022	1.23333	up	ASCC2	84164	Homo sapiens activating signal cointegrator 1 complex subunit 2 (ASCC2), mRNA.	GO:0006350|GO:0006355	GO:0005634|GO:0005737|GO:0005925		chr22	30184657	30184706	CAAACCTCGGGCCACAAGACACCACTTCCCCTTTACCCTGGACAGCAGGA
1510026	0.0422719	0.00545921	1.20255	up	FLVCR2	55640	Homo sapiens feline leukemia virus subgroup C cellular receptor family, member 2 (FLVCR2), mRNA.	GO:0006810	GO:0005886|GO:0016021	GO:0005215	chr14	75184054	75184103	GTCCACGTTTTCGGCAGAAGTAGTGAGTCAGTGTGGAAGAGAGGTGAGGG
990577	0.00143589	5.88561e-05	1.36417	down	ETV4	2118	Homo sapiens ets variant 4 (ETV4), transcript variant 1, mRNA.	GO:0006355|GO:0008045|GO:0009887|GO:0045941	GO:0005634|GO:0005730	GO:0003700|GO:0016563|GO:0043565	chr17	41605498	41605547	GCGCTTCCCAACTTCATACTGGCAGGAGGGTGAGGAGGTTCACTGAGCTC
2480722	6.13117e-08	1.23416e-10	2.02091	down	UBE2T	29089	Homo sapiens ubiquitin-conjugating enzyme E2T (putative) (UBE2T), mRNA.	GO:0006511|GO:0043687|GO:0051246	GO:0005634|GO:0005730|GO:0005737	GO:0004842|GO:0016874	chr1	200568772	200568821	GCCAGCCTTCCTCAAGAATGCCAGACAGTGGACAGAGAAGCATGCAAGAC
6590753	0.0357334	0.00434411	1.29206	up	PABPC5	140886	Homo sapiens poly(A) binding protein, cytoplasmic 5 (PABPC5), mRNA.		GO:0005737	GO:0000166|GO:0003723|GO:0000166|GO:0003676	chrX	90578403	90578452	TTCAGCCTTAGTTGGTGCCTCCTTAGTTTGGGCTCCTTTGTGATAAGGGG
6290021	0.000891201	3.14798e-05	1.37024	down	PSMD7	5713	Homo sapiens proteasome (prosome, macropain) 26S subunit, non-ATPase, 7 (PSMD7), mRNA.	GO:0031145|GO:0051436|GO:0051437	GO:0000502|GO:0005829|GO:0005838	GO:0005515	chr16	72897250	72897299	GCTCTCTGCCTCCGGTCACTCTTGCTGTGGTGCTACGTGGAAGTGAATGG
6250154	0.0143486	0.00123891	1.40754	down	LZTFL1	54585	Homo sapiens leucine zipper transcription factor-like 1 (LZTFL1), mRNA.				chr3	45865671	45865720	GGTGGTTTGAGCCTTGATTAGACTTTTGATGTGCTAAGCCAGACAGGCAG
610170	0.00535413	0.000335519	1.28024	down	EREG	2069	Homo sapiens epiregulin (EREG), mRNA.	GO:0001525|GO:0001550|GO:0001556|GO:0001819|GO:0007143|GO:0007173|GO:0007267|GO:0007275|GO:0009299|GO:0009887|GO:0016481|GO:0019221|GO:0030216|GO:0030728|GO:0042060|GO:0042327|GO:0042327|GO:0042327|GO:0042700|GO:0043616|GO:0045089|GO:0045410|GO:0045740|GO:0045740|GO:0045740|GO:0045740|GO:0045741|GO:0045840|GO:0045840|GO:0048146|GO:0048160|GO:0048661|GO:0050680|GO:0051151	GO:0005576|GO:0005615|GO:0005615|GO:0005886|GO:0005887	GO:0005154|GO:0005154|GO:0005515|GO:0008083|GO:0046982	chr4	75252909	75252958	CATCTGTGCCCGATTTTAGTATGTGCAGGGGGGCGATCTGGGAATCAGTC
6940647	0.00545276	0.000343528	1.3241	up	C16orf58	64755	Homo sapiens chromosome 16 open reading frame 58 (C16orf58), mRNA.		GO:0016020|GO:0016021		chr16	31408331	31408380	GGCTTTAATCACCAACCCATCAACATCAAGCCTCCCCCAGGCCGGTTCAA
1090564	0.0231606	0.00239728	1.25825	up	TMEM175	84286	Homo sapiens transmembrane protein 175 (TMEM175), mRNA.		GO:0016020|GO:0016021		chr4	942105	942154	AGCCAAGTCACGGGCAGGCCGCAGTGGTTCTTGCGTGGCCTGGTTTTATT
3440689	1.58532e-05	1.72153e-07	1.63313	down	ACYP1	97	Homo sapiens acylphosphatase 1, erythrocyte (common) type (ACYP1), transcript variant 1, mRNA.	GO:0006796		GO:0003998|GO:0003998|GO:0016787	chr14	75530234	75530675	CGGTGGGGAAGACAAGGAGGGTTTGAGCATGGCAGAAGGAAACACCCTGA
5910148	3.62331e-06	2.64868e-08	1.75546	down	ACYP1	97	Homo sapiens acylphosphatase 1, erythrocyte (common) type (ACYP1), transcript variant 1, mRNA.	GO:0006796		GO:0003998|GO:0003998|GO:0016787	chr14	75520237	75520286	GGTCCCATCTCCAAGGTGCGTCATATGCAGGAATGGCTTGAAACAAGAGG
610152	0.0120791	0.000993439	1.24994	up	DAB2	1601	Homo sapiens disabled homolog 2, mitogen-responsive phosphoprotein (Drosophila) (DAB2), mRNA.	GO:0000904|GO:0001701|GO:0006898|GO:0006907|GO:0007588|GO:0008283	GO:0005905|GO:0016020|GO:0031410	GO:0008022	chr5	39411864	39411913	GAACACCTGCCTTCTACCCTCTGGTTGGGAGATGCAGCCACCACATCCCT
1240576	0.0349916	0.00422242	1.26376	down	HSPC268	154791	Homo sapiens hypothetical protein HSPC268 (HSPC268), mRNA.				chr7	138681223	138681272	TAAAAGTAGTACAAGCCTTAGCCAGGCACGGTGGCTCACGCCTGTAATCC
2600537	0.00699223	0.000477981	1.43791	down	CBFB	865	Homo sapiens core-binding factor, beta subunit (CBFB), transcript variant 2, mRNA.	GO:0008150|GO:0006366	GO:0005575|GO:0005634|GO:0005634	GO:0003674|GO:0003713|GO:0003700|GO:0003700|GO:0003702|GO:0003713|GO:0005515|GO:0005515	chr16	65691916	65691965	GCTCACATGTTTACACACTCAGTGCCCTAATTTCCCCTGAGGGAATCGCT
4780128	0.0391805	0.00492713	1.22626	up	ATF3	467	Homo sapiens activating transcription factor 3 (ATF3), transcript variant 4, mRNA.	GO:0006094|GO:0006355|GO:0006355|GO:0006355|GO:0006355|GO:0006355	GO:0005634|GO:0005634|GO:0005634|GO:0005634|GO:0005634|GO:0005730	GO:0003700|GO:0016564|GO:0043565|GO:0046983|GO:0003700|GO:0043565|GO:0046983|GO:0003700|GO:0043565|GO:0046983|GO:0003700|GO:0043565|GO:0046983|GO:0003700|GO:0003714|GO:0042802|GO:0043565|GO:0046983	chr1	210860205	210860254	CTCCCAGCGTTAACACAAAATCCATGGGCAGTATGATGGCAGGTCCTCTG
1500131	0.00545276	0.000343109	1.35067	up	CPEB4	80315	Homo sapiens cytoplasmic polyadenylation element binding protein 4 (CPEB4), mRNA.			GO:0000166|GO:0003723	chr5	173317563	173317612	ACTGAAAGCAGTCATGCGAATGGAGGGTGCTCTTGTGTAGCTGGTCAGGG
1110072	0.0455126	0.00608988	1.21065	up	PEX16	9409	Homo sapiens peroxisomal biogenesis factor 16 (PEX16), transcript variant 1, mRNA.	GO:0016557|GO:0016557|GO:0016558|GO:0032581|GO:0045046	GO:0005777|GO:0005777|GO:0005778|GO:0005779|GO:0005789|GO:0016020|GO:0016021|GO:0005778	GO:0008022	chr11	45888368	45888417	CCACCTGGCAGAAAATCTACTTCTACAGTTGGGGCTGACAGACCTCCCGG
2060561	0.000302231	7.42851e-06	1.45267	up	MAPK3	5595	Homo sapiens mitogen-activated protein kinase 3 (MAPK3), mRNA.	GO:0006468|GO:0007049|GO:0007265|GO:0044419	GO:0005575|GO:0005634|GO:0005654|GO:0005654|GO:0005654|GO:0005654|GO:0005654|GO:0005730|GO:0005829|GO:0005856	GO:0000166|GO:0004674|GO:0004674|GO:0004707|GO:0004707|GO:0005515|GO:0005524|GO:0016740				TGGAGAGCCCGGCGCCCCTGCCACCTCCCTGACCCGTCTAATATATAAAT
5810278	0.000588583	1.80844e-05	1.42535	up	SYTL2	54843	Homo sapiens synaptotagmin-like 2 (SYTL2), transcript variant d, mRNA.	GO:0006886|GO:0016192	GO:0005624|GO:0012505|GO:0016020|GO:0019897|GO:0042470	GO:0017137|GO:0042043	chr11	85083838	85083887	TGAGCCCAAATTCCACTGGCTCCTCCACTGAAAACTACTAAACCGGTGGA
150129	0.00147245	6.13543e-05	1.40863	down	C1orf135	79000	Homo sapiens chromosome 1 open reading frame 135 (C1orf135), mRNA.				chr1	26160535	26160584	TCTGGATGTGACTCTGTTACCCTTTTCCCACAAGATAGGAGGGAATCCCC
6900195	0.00453033	0.000270547	1.30021	up	CNO	55330	Homo sapiens cappuccino homolog (mouse) (CNO), mRNA.	GO:0032438	GO:0005737	GO:0005515	chr4	6718897	6718946	GCCTGTGTCTTCCAGCTCTAATCAGAAAGCTGCTTGTCGAGGGCATGGGG
5860358	0.00236857	0.000115053	1.44022	down	CANT1	124583	Homo sapiens calcium activated nucleotidase 1 (CANT1), mRNA.	GO:0043123	GO:0005783|GO:0005789|GO:0005794|GO:0016020|GO:0016021	GO:0004871|GO:0005509|GO:0016787|GO:0017110	chr17	74499665	74499714	TGCCTGGCTGTCTCCTTGACCCGCCTCCTAGATCATTGTCCTTGATGTCC
160148	0.0100836	0.000786264	1.29132	up	AK3L1	205	Homo sapiens adenylate kinase 3-like 1 (AK3L1), nuclear gene encoding mitochondrial protein, transcript variant 6, mRNA.	GO:0006139	GO:0005739|GO:0005759	GO:0000166|GO:0004017|GO:0005524|GO:0005525|GO:0016740	chr1	65465577	65465626	GGGGTTGAGCAGAATGTTGTACTAGCTGTGCCTGGACTGAGTATAACAGC
5960324	0.00162185	6.94182e-05	1.35335	down	ARL6IP1	23204	Homo sapiens ADP-ribosylation factor-like 6 interacting protein 1 (ARL6IP1), mRNA.	GO:0006613	GO:0005737|GO:0005784|GO:0005829|GO:0012505|GO:0016020|GO:0016021	GO:0005515	chr16	18803334	18803383	TTAGGAATGAACTTCTGAGGGCCAAAAAATGTGACTGACGGGAACAATTC
2690047	0.000146459	3.04121e-06	1.49914	down	ARL6IP1	23204	Homo sapiens ADP-ribosylation factor-like 6 interacting protein 1 (ARL6IP1), mRNA.	GO:0006613	GO:0005737|GO:0005784|GO:0005829|GO:0012505|GO:0016020|GO:0016021	GO:0005515	chr16	18803469	18803518	AGGGCTGTTGGTGAGAGCAGACTTGAGGTGATGATAGTTGGCCTCTGGTC
450164	0.00394369	0.000226452	1.40071	down	RAB5C	5878	Homo sapiens RAB5C, member RAS oncogene family (RAB5C), transcript variant 1, mRNA.				chr17	40277185	40277234	GCATTATTGTGACAGCCACGAACCCATTGCCCACAACCCCTCCACCCTCG
6900408	0.0300401	0.00344511	1.24711	up	EFEMP1	2202	Homo sapiens EGF-containing fibulin-like extracellular matrix protein 1 (EFEMP1), transcript variant 2, mRNA.	GO:0007601	GO:0005576|GO:0005578	GO:0005509|GO:0005509|GO:0005515	chr2	56098001	56098050	ACCGATGTGTTTGCCCAGTCTCAAATGCCATGTGCCGAGAACTGCCCCAG
6060646	0.00647347	0.000429324	1.28472	up	CRYZL1	9946	Homo sapiens crystallin, zeta (quinone reductase)-like 1 (CRYZL1), mRNA.	GO:0008152|GO:0008152|GO:0008152|GO:0055114	GO:0005737	GO:0005488|GO:0008270|GO:0016491|GO:0005488|GO:0008270|GO:0016491|GO:0005488|GO:0008270|GO:0016491|GO:0003960|GO:0005488|GO:0008270|GO:0016491	chr21	34968092	34968141	TTGGATCCTCCAGATAGCCACTGCCTTTTCCTCAAGGGAGCAACGTTAGC
2450411	0.000359943	9.66686e-06	1.40716	up	DNAJC12	56521	Homo sapiens DnaJ (Hsp40) homolog, subfamily C, member 12 (DNAJC12), transcript variant 1, mRNA.	GO:0006457		GO:0031072|GO:0051082	chr10	69556800	69556849	GGAAGAGCAAGACTGTCCCCTATGCTGCCAACATGCAGTCTTTGTTTATG
6900672	0.00169503	7.40558e-05	1.36891	down	RPL39L	116832	Homo sapiens ribosomal protein L39-like (RPL39L), mRNA.	GO:0006412|GO:0007283	GO:0005622|GO:0005840|GO:0022625	GO:0003735	chr3	188321774	188328493	CAGACTTGAAAAAGTGGTGTGTGGTTGACTCTGTTTCTCGCCATGTCTTC
1050709	0.0014437	5.93447e-05	1.86043	up	RPL8	6132	Homo sapiens ribosomal protein L8 (RPL8), transcript variant 2, mRNA.	GO:0006414	GO:0005622|GO:0005737|GO:0005829|GO:0005840|GO:0022625	GO:0003735|GO:0019843	chr8	146017674	146017723	ATGGGCAGTATCCGCCGCCATCCTCTTCCGTGAGGCGCGCTGAGACCCGG
2060440	0.00955279	0.000729692	1.30173	up	MAFB	9935	Homo sapiens v-maf musculoaponeurotic fibrosarcoma oncogene homolog B (avian) (MAFB), mRNA.	GO:0007379|GO:0007423|GO:0007585|GO:0042472|GO:0045647|GO:0045944	GO:0005634|GO:0005667|GO:0005737	GO:0003700|GO:0008134|GO:0043565|GO:0046983	chr20	39314809	39314858	TCCCATTTGAAATTGCTGGCGCTGCTGGCCGGATGCATTTTTGAGTTTGT
6110630	0.00655702	0.000437992	1.29935	up	HIST1H2BK	85236	Homo sapiens histone cluster 1, H2bk (HIST1H2BK), mRNA.	GO:0006334|GO:0042742	GO:0000786|GO:0005634|GO:0005694	GO:0003677	chr6	27214075	27214124	CCCACTGGGGGGTTGGGGTAATATTCTGTGGTCCTCAGCCCTGTACCTTA
5050402	0.0409254	0.00523328	1.3025	up	HIST1H2BK	85236	Homo sapiens histone cluster 1, H2bk (HIST1H2BK), mRNA.	GO:0006334|GO:0042742	GO:0000786|GO:0005634|GO:0005694	GO:0003677	chr6	27222496	27222545	CAGCGAAGTCCGCTCCCGCGCCCAAGAAGGGCTCGAAGAAAGCCGTGACT
2750128	0.00215555	0.000102879	1.3276	up	SLC7A11	23657	Homo sapiens solute carrier family 7, (cationic amino acid transporter, y+ system) member 11 (SLC7A11), mRNA.	GO:0006810|GO:0006865	GO:0016020|GO:0016021	GO:0015171|GO:0015327	chr4	139319866	139319915	CAGGGATTGGCTTCGTCATCACTCTGACTGGAGTCCCTGCGTATTATCTC
2480224	0.0182638	0.00172886	1.25111	up	PGM3	5238	Homo sapiens phosphoglucomutase 3 (PGM3), mRNA.	GO:0005975|GO:0006041|GO:0006048|GO:0007283|GO:0009790|GO:0019255|GO:0030097	GO:0005575	GO:0000287|GO:0004610|GO:0004610|GO:0004614|GO:0016853	chr6	83938403	83938452	CTTGGCTCTGAAGGGCTTGACTGTACAACAGTGGGATGCTCTCTATACAG
4390487	0.0246625	0.00262589	1.30571	up	RAB13	5872	Homo sapiens RAB13, member RAS oncogene family (RAB13), mRNA.	GO:0006355|GO:0007264|GO:0015031|GO:0006355|GO:0007155|GO:0007264|GO:0015031|GO:0016192	GO:0005622|GO:0005794|GO:0005923|GO:0005622|GO:0005737|GO:0005794|GO:0005886|GO:0005923|GO:0030659|GO:0031410	GO:0000166|GO:0005524|GO:0005525|GO:0008134|GO:0000166|GO:0003924|GO:0005524|GO:0005525|GO:0008134	chr1	153954462	153954511	GAGCAGGGGAGAAATAGCAGAGGGGCTTGGAGGGTCACATAGGTAGATGG
5690274	4.0068e-05	5.73067e-07	1.51431	down	MCM6	4175	Homo sapiens minichromosome maintenance complex component 6 (MCM6), mRNA.	GO:0006260|GO:0006260|GO:0006268|GO:0006270|GO:0006350|GO:0006355|GO:0007049	GO:0005634|GO:0005654|GO:0005654|GO:0005654|GO:0005654|GO:0005654|GO:0005654|GO:0005654	GO:0000166|GO:0003677|GO:0003678|GO:0003697|GO:0005524|GO:0042802	chr2	136598167	136598216	GGCTTCAGCACTTCCTTTGGTGTGTTTCCTGTCCCAGTGAAGTTGGAACC
380152	0.0103473	0.000813405	1.25516	up	ZNF2	7549	Homo sapiens zinc finger protein 2 (ZNF2), transcript variant 1, mRNA.	GO:0006350|GO:0006355|GO:0006355|GO:0006355	GO:0005622|GO:0005634|GO:0005622|GO:0005622|GO:0005634	GO:0003677|GO:0008270|GO:0046872|GO:0003676|GO:0008270|GO:0046872|GO:0003676|GO:0008270|GO:0046872	chr2	95213620	95213669	ACGACCCTATTACTCTGTTCACCCTAGAGCAGACGAACGGCAGGGAAGAC
4200601	0.00121728	4.75285e-05	1.39857	down	TMEM48	55706	Homo sapiens transmembrane protein 48 (TMEM48), mRNA.	GO:0015031|GO:0031081|GO:0051028|GO:0051292|GO:0065002	GO:0005634|GO:0005643|GO:0016020|GO:0016021|GO:0031965	GO:0017056	chr1	54238088	54238137	CCTCATGCTTCCAGTAAACCACCCCGGATTTCAGGAAGCCTTGTGGACAC
580598	0.0108662	0.000869737	1.29631	up	ANKZF1	55139	Homo sapiens ankyrin repeat and zinc finger domain containing 1 (ANKZF1), transcript variant 2, mRNA.		GO:0005622	GO:0008270|GO:0046872	chr2	219809292	219809341	TGCTGGAGTTGTGGGGCATCCCTCCAAGGCCTGACTCCCTTTCACTACCT
6180176	0.0354661	0.0043041	1.2632	up	AES	166	Homo sapiens amino-terminal enhancer of split (AES), transcript variant 3, mRNA.	GO:0006350|GO:0006355|GO:0007275|GO:0009887|GO:0016055	GO:0005634	GO:0005515	chr19	3053681	3053730	GCGGAGCTCGGGATTGGCTAAACTCCCATAGTATTTATGGTGGCCGCCGG
2570019	0.000140253	2.88262e-06	1.43644	down	C11orf82	220042	Homo sapiens chromosome 11 open reading frame 82 (C11orf82), mRNA.				chr11	82322969	82323018	GGCCCACCTTCAGTGTGTGAAACTCGAAGTGCTTGGTCACCTGAATTGTT
5420377	0.0117694	0.000960103	1.31076	up	LGALS3	3958	Homo sapiens lectin, galactoside-binding, soluble, 3 (galectin 3) (LGALS3), mRNA.	GO:0001501|GO:0030154|GO:0030198	GO:0005578|GO:0005634|GO:0005737|GO:0005886	GO:0005515|GO:0005529|GO:0019863	chr14	54681712	54681761	CCTCACCAGTGCTTCATATACCATGATATAATCTGAAAGGGGCAGATTAA
60184	0.000794943	2.63184e-05	1.38245	up	NDN	4692	Homo sapiens necdin homolog (mouse) (NDN), mRNA.	GO:0001558|GO:0001764|GO:0006350|GO:0006355|GO:0007413|GO:0007417|GO:0007585|GO:0008285|GO:0008347|GO:0019233|GO:0048011|GO:0048666|GO:0048676	GO:0005634|GO:0005737|GO:0005813|GO:0043204	GO:0003677|GO:0005515|GO:0043015	chr15	23930940	23930989	GGCCCTTCATGACCTTGCTGGGCACAGAAAACACCCTCGTGGAGTACACT
290309	0.000403028	1.11015e-05	1.46114	up	FAM125A	93343	Homo sapiens family with sequence similarity 125, member A (FAM125A), mRNA.		GO:0005634|GO:0005737	GO:0017124	chr19	17397021	17397070	TGCCGGGCAGGGCTGGAGCTGGACAGAAGCCAGTGCCTTTAAGTCATTTG
5960142	0.025104	0.00269502	1.24673	down	ACYP1	97	Homo sapiens acylphosphatase 1, erythrocyte (common) type (ACYP1), transcript variant 2, mRNA.	GO:0006796		GO:0003998|GO:0003998|GO:0016787	chr14	75528391	75528440	GCTGAAACTCACAGCAAGAGCTGTGTTCCAGTTAGCTTTGCTACCAGTTA
6900279	0.00357006	0.000198404	1.35372	down	C21orf24	400866	Homo sapiens chromosome 21 open reading frame 24 (C21orf24), mRNA.				chr21	39043113	39043162	AAAAATTAGCCAGGCGTGGTGGCGTGTGCCTGTAATCCCAGCAACTCAGG
360463	0.0229866	0.00236952	1.23685	down	SRR	63826	Homo sapiens serine racemase (SRR), mRNA.	GO:0006563|GO:0008152		GO:0016853|GO:0018114|GO:0030170|GO:0030378	chr17	2174950	2174999	ACCCATGCAAGAGCCTGGTTTGTCATCCCTGCCCTAGCCCAATCTGAGGC
6840328	0.000483604	1.40127e-05	1.41847	down	SMAD3	4088	Homo sapiens SMAD family member 3 (SMAD3), transcript variant 1, mRNA.	GO:0000122|GO:0001666|GO:0001707|GO:0006350|GO:0006355|GO:0006917|GO:0006919|GO:0006955|GO:0007050|GO:0007183|GO:0016202|GO:0017015|GO:0019049|GO:0030308|GO:0032909|GO:0042993|GO:0045930|GO:0045944|GO:0048340|GO:0050678|GO:0051098	GO:0005622|GO:0005634|GO:0005654|GO:0005667|GO:0005737|GO:0005829|GO:0005829|GO:0005829|GO:0005886|GO:0043235	GO:0003690|GO:0003700|GO:0008134|GO:0015460|GO:0016563|GO:0042803|GO:0043565|GO:0046332	chr15	65274286	65274335	TGCAACTCGGCTGTTCTGGACTCTGATGTGTGTGGAGGGATGGGGAATAG
6520156	0.048609	0.00671634	1.21362	down	PRCC	5546	Homo sapiens papillary renal cell carcinoma (translocation-associated) (PRCC), transcript variant 1, mRNA.	GO:0008150	GO:0005575	GO:0003674	chr1	155036967	155037016	CAGGATCTCTTTCCCCAAGGACCCAGCCCTCGCCTCTGCGAGAATGAACA
10463	0.000871936	3.02267e-05	1.74692	up	PDIA6	10130	Homo sapiens protein disulfide isomerase family A, member 6 (PDIA6), mRNA.	GO:0006457|GO:0045454	GO:0005783|GO:0005788|GO:0005793|GO:0042470	GO:0003756|GO:0005515|GO:0016853	chr2	10927527	10928833	GAAAATGTGGGGGTGGCTGTGGACAGAAGCTGGAGCCCAGTCTGAACTTG
1110300	0.000891201	3.14333e-05	1.50624	down	TMEM154	201799	Homo sapiens transmembrane protein 154 (TMEM154), mRNA.		GO:0016020|GO:0016021		chr4	153767020	153767069	GAAGTTAGTATACAGCCAGAACAGCCAAGCCTCAATTCTTGTACCTTGTG
2230433	0.00545276	0.000343722	1.36475	down	TMEM154	201799	Homo sapiens transmembrane protein 154 (TMEM154), mRNA.		GO:0016020|GO:0016021		chr4	153767258	153767307	TCCAACCCTATCAAATAATGAACTTCTCAGAGAGGCATCTGGGGTCCTGG
430411	0.0484127	0.00667027	1.21648	down	TOR3A	64222	Homo sapiens torsin family 3, member A (TOR3A), mRNA.	GO:0051085|GO:0051085|GO:0051085	GO:0005737|GO:0005783|GO:0005783|GO:0005783	GO:0000166|GO:0005524|GO:0005524|GO:0005524	chr1	177331412	177331461	CTCAGAGGCTGTAGGGTCCTTGGGTTACAGAGCCGGGGAGAACGAAGTTC
3290576	7.73826e-05	1.32241e-06	1.48473	up	VRK3	51231	Homo sapiens vaccinia related kinase 3 (VRK3), transcript variant 2, mRNA.	GO:0006468|GO:0006468	GO:0005634	GO:0000166|GO:0004674|GO:0005515|GO:0005524|GO:0016740|GO:0004672|GO:0005524	chr19	55174168	55174217	TGCAGGATCTGCGTGTGTCTCCATATGACCCCATTGGCCTCCCGATGGTG
290661	0.0294806	0.0033544	1.231	up	CLN8	2055	Homo sapiens ceroid-lipofuscinosis, neuronal 8 (epilepsy, progressive with mental retardation) (CLN8), mRNA.	GO:0001306|GO:0006644|GO:0006869|GO:0007006|GO:0007040|GO:0007399|GO:0007628|GO:0008203|GO:0008306|GO:0008361|GO:0008610|GO:0021522|GO:0035176|GO:0043066|GO:0044257|GO:0045494|GO:0045861|GO:0046513|GO:0050881|GO:0050884|GO:0050885|GO:0051348|GO:0051935|GO:0060041|GO:0060052	GO:0005783|GO:0005789|GO:0016020|GO:0016021|GO:0016021|GO:0033116		chr8	1719321	1719370	GTCGTGGTTCAGGCAGTATGGGCCGCTGTGACAAAACACCTAAGACTGGG
3850603	0.0120791	0.000993686	1.39498	up	PTPRN	5798	Homo sapiens protein tyrosine phosphatase, receptor type, N (PTPRN), mRNA.	GO:0006470	GO:0005887|GO:0016020	GO:0004872|GO:0005001|GO:0005515|GO:0005515|GO:0005515|GO:0005515|GO:0005515|GO:0016791	chr2	220154577	220154626	CTGGGAGTTCCCTGAACATCTGTGTGTGTCCCCCTATGCTCCAGTATGGA
1820189	0.0168027	0.00154132	1.29639	down	ICT1	3396	Homo sapiens immature colon carcinoma transcript 1 (ICT1), mRNA.	GO:0006415|GO:0008150	GO:0005575	GO:0003674|GO:0003747	chr17	70528667	70528716	AGACAAGCAGGAGGGTCGACATGGACTGAAATCACCCTCTGCAGCTGGGA
6590243	0.00865981	0.000642674	1.35868	up	PITPNA	5306	Homo sapiens phosphatidylinositol transfer protein, alpha (PITPNA), mRNA.	GO:0006629|GO:0006810|GO:0007601	GO:0005622|GO:0005634|GO:0005737	GO:0005515|GO:0008289|GO:0008525|GO:0008526	chr17	1368315	1368364	TGCTTCCATCAGAATTCCAGGGTCACAGCCCCAACAGAAGCAGCAGTGCC
5340551	0.00324586	0.000175963	1.3601	down	ATAD1	84896	Homo sapiens ATPase family, AAA domain containing 1 (ATAD1), mRNA.			GO:0000166|GO:0005524|GO:0017111	chr10	89514432	89514481	CCAGAATTCTGTTATAGGCACCTAACCACGCAGCATGAGGAAAACGGCAC
4180563	0.00260018	0.000130574	1.39836	down	LOC613037	613037	Homo sapiens nuclear pore complex interacting protein pseudogene (LOC613037), non-coding RNA.				chr16	30234500	30234549	AAACCCAAGAGGCGGAGGGTCGGTGATGTGGAACCGTCACGCAAACCCAA
5550673	0.0061243	0.000400003	1.29296	down	SIVA	10572	Homo sapiens CD27-binding (Siva) protein (SIVA), transcript variant 1, mRNA.				chr14	104293138	104293187	CACGTGGGCAGATGCTGATTGGACCAGACGGCCGCCTGATCAGGAGCCTT
7040161	0.0113747	0.000921276	1.25909	down	HELLS	3070	Homo sapiens helicase, lymphoid-specific (HELLS), mRNA.	GO:0006346|GO:0006350|GO:0006355|GO:0007049|GO:0007067|GO:0007275|GO:0010216|GO:0031508|GO:0046651|GO:0051301	GO:0005634|GO:0005721	GO:0000166|GO:0003677|GO:0004386|GO:0005524|GO:0016787|GO:0003677|GO:0004386|GO:0005524	chr10	96340288	96340422	CAGGCTGATGTGTACTTAACCACTTCCAGATTTATACAGTCTTCCTGTGG
110161	0.022684	0.00231671	1.22254	up	EFR3A	23167	Homo sapiens EFR3 homolog A (S. cerevisiae) (EFR3A), mRNA.		GO:0005886	GO:0005488	chr8	133025013	133025062	TCTGCAAGAGATTCTGCAGGAACTGGGTGTGCACACGGTGTTGTAGCCAG
7000703	0.00264143	0.000133345	1.3516	down	POLR3K	51728	Homo sapiens polymerase (RNA) III (DNA directed) polypeptide K, 12.3 kDa (POLR3K), mRNA.	GO:0006383|GO:0045449	GO:0005634|GO:0005666|GO:0005737	GO:0003677|GO:0003899|GO:0008270|GO:0030528|GO:0046872	chr16	97262	97311	CCTTTTGAGGTGAAGAGCCAGGGGGTCAGGAAATATGGCCTATCTGCCAG
1990327	0.0149584	0.00130862	1.26537	down	TUBB4Q	56604	Homo sapiens tubulin, beta polypeptide 4, member Q (TUBB4Q), mRNA.	GO:0007018|GO:0051258	GO:0005856|GO:0005874|GO:0043234	GO:0000166|GO:0003924|GO:0005198|GO:0005525	chr4	191140731	191140780	GCGAGGGCATGGATGAGATGGAATTCACTGAGGCCGAGAGCAACATGAAC
360753	0.0382331	0.00477559	1.21673	down	MKRN2	23609	Homo sapiens makorin ring finger protein 2 (MKRN2), mRNA.	GO:0008150	GO:0005622	GO:0003674|GO:0003676|GO:0005515|GO:0008270|GO:0046872	chr3	12599586	12599635	GGCACCCAAGGTTTCTGATTCTGACCCAGCAGTGGTCCTGAAGAGAGCTG
2750709	1.83825e-05	2.06532e-07	1.64559	down	LSM12	124801	Homo sapiens LSM12 homolog (S. cerevisiae) (LSM12), mRNA.				chr17	39467788	39467837	CTAACCTGCTGAGAGCTAAAATTGGCACCCATTGCCCCGTGCCTTCAGGC
2140097	0.00193829	8.97376e-05	1.37887	up	PIK3R2	5296	Homo sapiens phosphoinositide-3-kinase, regulatory subunit 2 (beta) (PIK3R2), mRNA.	GO:0007165|GO:0019987|GO:0007165|GO:0019987	GO:0005622|GO:0005942|GO:0005622|GO:0005829|GO:0005942	GO:0005515|GO:0016303|GO:0035014|GO:0005515|GO:0016303|GO:0035014	chr19	18142222	18142271	TTTGGGACAAGAGCCCTGGTTTTCTACGCTGCCCTTGGCCACCACACTGC
6550373	4.51599e-05	6.71268e-07	1.49464	down	CENPN	55839	Homo sapiens centromere protein N (CENPN), mRNA.		GO:0000775|GO:0000777|GO:0005634|GO:0005694		chr16	79611335	79613862	TTCACGTCCTCCTCCATGCTGAGGCGCAATACACCGCTTCTGGGTCAGGA
1050240	0.0200405	0.00196286	1.24865	up	POLD4	57804	Homo sapiens polymerase (DNA-directed), delta 4 (POLD4), mRNA.	GO:0001938|GO:0006260|GO:0006297	GO:0005634|GO:0005654|GO:0005654	GO:0003887|GO:0005515|GO:0016740|GO:0016779	chr11	66875859	66875908	GGTGTCAGAGGCTCAACTCCTCCATCTAACCAGCAGGCTCCCAGAGTCCC
4250711	0.042309	0.00546805	1.22215	down	GPR177	79971	Homo sapiens G protein-coupled receptor 177 (GPR177), transcript variant 1, mRNA.	GO:0043123	GO:0016020|GO:0016021	GO:0004872|GO:0004872|GO:0004872|GO:0004871	chr1	68591451	68591500	CCTTTGCGGTCCCAGTCCAAGGTAGGCTGGTGTCATAGTCTTCTCACTCC
6220075	0.0303263	0.00349721	1.36974	up	GPR177	79971	Homo sapiens G protein-coupled receptor 177 (GPR177), transcript variant 1, mRNA.	GO:0043123	GO:0016020|GO:0016021	GO:0004872|GO:0004872|GO:0004872|GO:0004871	chr1	68591898	68591947	TGAGATCTACAAGTTGACCCGCAAGGAGGCCCAGGAGTAGGAGGCTGCAG
6270095	0.0117694	0.000959584	1.31652	down	BRI3	25798	Homo sapiens brain protein I3 (BRI3), mRNA.		GO:0016020|GO:0016021		chr7	97758418	97758467	TCCCCTTTGGGTTCATTTGCTGTTTTGCCTTGAGGAAGCGACGATGCCCC
870646	0.0200614	0.00196597	1.27114	up	ERLIN2	11160	Homo sapiens ER lipid raft associated 2 (ERLIN2), transcript variant 3, mRNA.	GO:0008150	GO:0005737|GO:0005783|GO:0005789|GO:0005886|GO:0016021	GO:0003674	chr8	37714686	37717070	CATATTGGGGTATATTACAGAGGCGGTGCCCTGCTGACTTCGACCAGCGG
2060079	0.0342735	0.00410672	1.22461	up	MGAT2	4247	Homo sapiens mannosyl (alpha-1,6-)-glycoprotein beta-1,2-N-acetylglucosaminyltransferase (MGAT2), transcript variant 2, mRNA.	GO:0009312|GO:0018279	GO:0000139|GO:0005624|GO:0005794|GO:0005795|GO:0016020|GO:0016021	GO:0008455|GO:0016757	chr14	49158361	49158410	GGGTGCATCAATGCTGAGTATCCCGACTCCTTCGGCCATTATAGAGAGGC
3180731	0.00246132	0.000120863	1.37064	up	MGST1	4257	Homo sapiens microsomal glutathione S-transferase 1 (MGST1), transcript variant 1b, mRNA.	GO:0006749	GO:0005739|GO:0005741|GO:0005743|GO:0005783|GO:0005792|GO:0016020	GO:0004364|GO:0016740	chr12	16391846	16391895	AGTCCCTGCATTGCGCGCGACCCGGCGGCGGGACAGGCTTGCTGCTTCCT
4920273	0.0306829	0.00355134	1.22537	up	PIK4CA	5297	Homo sapiens phosphatidylinositol 4-kinase, catalytic, alpha polypeptide (PIK4CA), transcript variant 1, mRNA.				chr22	19392115	19392164	ACGCCATGGACTGCAGCGACAATCAATGGATGGTGCTGTCTATGCACAGG
3940736	0.0403119	0.00511853	1.25487	up	NME2	4831	Homo sapiens non-metastatic cells 2, protein (NM23B) expressed in (NME2), transcript variant 3, mRNA.	GO:0006183|GO:0006228|GO:0006241|GO:0006183|GO:0006228|GO:0006241|GO:0006350|GO:0006355|GO:0007155|GO:0008285|GO:0009117|GO:0009142|GO:0043066|GO:0045618|GO:0045682|GO:0045786|GO:0050679	GO:0001726|GO:0005634|GO:0005737|GO:0030027	GO:0000166|GO:0004550|GO:0005524|GO:0016301|GO:0016740|GO:0000166|GO:0000287|GO:0003700|GO:0004550|GO:0005515|GO:0005524|GO:0016301|GO:0016740	chr17	46599126	46599175	GGCCTCCGCGGGCCCCGCCAGAGCCTGCGCCCGGGCCCTGACCGCACCTC
4590228	0.0229447	0.00236278	1.25857	up	GLRX	2745	Homo sapiens glutaredoxin (thioltransferase) (GLRX), mRNA.	GO:0006810|GO:0022900|GO:0045454	GO:0005737|GO:0005829	GO:0009055|GO:0015035|GO:0015038|GO:0047485	chr5	95175728	95175777	AGTTGGTCTTGGTGTCATATGGATCAGAGGCACAAGTGCAGAGGCTGTGG
6380324	3.67341e-08	6.42137e-11	1.9402	down	CKAP2L	150468	Homo sapiens cytoskeleton associated protein 2-like (CKAP2L), mRNA.				chr2	113212054	113212103	AGTGCAAGCCCCAGAGACTGTTGTAGGTTGCTTTTTCTTCCTCCTGGGCA
2070026	0.000442595	1.25559e-05	1.46746	down	UPF3A	65110	Homo sapiens UPF3 regulator of nonsense transcripts homolog A (yeast) (UPF3A), transcript variant 2, mRNA.	GO:0000184|GO:0006810|GO:0051028	GO:0005634|GO:0005737	GO:0000166|GO:0003723|GO:0005487|GO:0005515	chr13	114088911	114088960	GGCCTCTGAGCCATGGTGTCGAGTGAAGAGTAGTTCTTGTTTGTTACAAC
7150427	0.000547023	1.66327e-05	1.61964	up	ARMCX3	51566	Homo sapiens armadillo repeat containing, X-linked 3 (ARMCX3), transcript variant 2, mRNA.		GO:0005634|GO:0005737|GO:0005856|GO:0016020|GO:0016021	GO:0005488	chrX	100768248	100768297	CTCTGAGAGCACAGAGGAGGCAAAAGCTTCTGTGGGATGTGCTAGTCGGC
2320647	0.000424714	1.18339e-05	1.44678	up	ARMCX3	51566	Homo sapiens armadillo repeat containing, X-linked 3 (ARMCX3), transcript variant 2, mRNA.		GO:0005634|GO:0005737|GO:0005856|GO:0016020|GO:0016021	GO:0005488	chrX	100768619	100768668	GAGGGTGTGGCAAAATGGAGCCTTTCACATCCTAGTGGTGGCCATTTGGT
3890372	6.9314e-05	1.17127e-06	1.60568	down	DSCC1	79075	Homo sapiens defective in sister chromatid cohesion 1 homolog (S. cerevisiae) (DSCC1), mRNA.	GO:0006260|GO:0007049	GO:0005634	GO:0003677	chr8	120915532	120915581	CTCATCACCAGGACAGTTGGAGGGGGTAGGCCGAGGTTAAATGGTCCACG
6400403	0.00165068	7.08258e-05	1.38401	down	RGS20	8601	Homo sapiens regulator of G-protein signaling 20 (RGS20), transcript variant 1, mRNA.	GO:0008277|GO:0009968	GO:0016020	GO:0004871|GO:0005096|GO:0005515	chr8	55033990	55034039	CCAGCAAGCTCGGTTTGAATACGTCACTTACCAGTGCCATTGCAGGACCC
2490259	0.00305431	0.000161792	1.33742	up	PINK1	65018	Homo sapiens PTEN induced putative kinase 1 (PINK1), nuclear gene encoding mitochondrial protein, mRNA.	GO:0006468|GO:0006950|GO:0007243	GO:0005739	GO:0000166|GO:0000287|GO:0004674|GO:0005524|GO:0016740	chr1	20850100	20850149	CACGAGGAACTCGTTTGAAGGGGGCAGCGTAGCATGTCTGATTTGCCACC
6100079	0.0427294	0.00554318	1.2458	down	CENPM	79019	Homo sapiens centromere protein M (CENPM), transcript variant 1, mRNA.		GO:0000775|GO:0000777|GO:0005634|GO:0005694|GO:0005737		chr22	42339614	42339663	GTGAAGCTGGCCCACACCTATCAAAGCCCCCTGCTCTACTGTGACCTGGA
6510192	1.81292e-05	2.02631e-07	1.69792	down	GBF1	8729	Homo sapiens golgi-specific brefeldin A resistant guanine nucleotide exchange factor 1 (GBF1), mRNA.	GO:0006890|GO:0006890|GO:0016044|GO:0032012|GO:0048205	GO:0000139|GO:0005622|GO:0005794	GO:0005086|GO:0005086|GO:0005515	chr10	104122321	104122370	GGCCAAGTCAGAGCTGCTGTTGCTGCCACTTGGATGGGGACCTGAAAAAG
1300041	0.0234778	0.0024492	1.22984	down	C19orf42	79086	Homo sapiens chromosome 19 open reading frame 42 (C19orf42), mRNA.		GO:0016020|GO:0016021		chr19	16757164	16757213	GAAAGGGAATCCTGGTTTTGTTGCCAAAATGAAACGCCCGGGGTTGGCGC
4560609	0.00258032	0.000128893	1.36799	up	LGR4	55366	Homo sapiens leucine-rich repeat-containing G protein-coupled receptor 4 (LGR4), mRNA.	GO:0007165|GO:0007186|GO:0030539|GO:0035239|GO:0050673|GO:0007186	GO:0005622|GO:0005886|GO:0016021|GO:0016021	GO:0004872|GO:0005515|GO:0008270|GO:0016500|GO:0005515|GO:0016500	chr11	27346025	27346074	AGGCCTGTGGACGAGCCTGCTTCTACCAGAGTAGAGGATTCCCTTTGGTG
2760491	0.000203143	4.48129e-06	1.43403	down	ATG16L1	55054	Homo sapiens ATG16 autophagy related 16-like 1 (S. cerevisiae) (ATG16L1), transcript variant 1, mRNA.	GO:0000045|GO:0006914|GO:0015031|GO:0051260	GO:0005737|GO:0005776|GO:0034045	GO:0005515	chr2	233868865	233868914	GATGGTCCTGGCCTCCACCTGCCCTCTCTTCCCTGCCTGATCACCGCTTT
6480059	8.74583e-06	7.64414e-08	1.6027	up	ACTA2	59	Homo sapiens actin, alpha 2, smooth muscle, aorta (ACTA2), mRNA.		GO:0005856|GO:0005737|GO:0005856	GO:0005515|GO:0000166|GO:0005198|GO:0005515|GO:0005524|GO:0000166|GO:0005198|GO:0005515|GO:0005524	chr10	90684907	90684956	CACTTTCCTGCTCCTCTCTGTCTCTAGCACACAACTGTGAATGTCCTGTG
4900348	0.00171056	7.55697e-05	1.4107	down	TCF3	6929	Homo sapiens transcription factor 3 (E2A immunoglobulin enhancer binding factors E12/E47) (TCF3), mRNA.	GO:0006355|GO:0000080|GO:0002326|GO:0002326|GO:0030890|GO:0045787|GO:0045893|GO:0045893|GO:0045893	GO:0005634|GO:0005667|GO:0005634|GO:0005634|GO:0005667|GO:0005667|GO:0005737|GO:0043234	GO:0030528|GO:0042803|GO:0046982|GO:0003700|GO:0003700|GO:0003700|GO:0003700|GO:0005515|GO:0005515|GO:0005515|GO:0005515|GO:0005515|GO:0005515|GO:0005515|GO:0008134|GO:0008134|GO:0042803|GO:0042803|GO:0043425|GO:0043565|GO:0046982	chr19	1560558	1560607	TCTGGGTGGCAGTGGCCCCATAGCCTCTGGAACTGTGCGTTCTGCATAGA
1470195	3.40516e-05	4.56354e-07	1.51874	down	MCM7	4176	Homo sapiens minichromosome maintenance complex component 7 (MCM7), transcript variant 2, mRNA.	GO:0006270|GO:0006260|GO:0006260|GO:0006270|GO:0006350|GO:0006355|GO:0006974|GO:0007049|GO:0042325	GO:0005634|GO:0005737|GO:0000785|GO:0005634|GO:0005634|GO:0005654|GO:0005654|GO:0005654|GO:0005654|GO:0005654|GO:0005654|GO:0005654|GO:0005737|GO:0042555	GO:0000166|GO:0003677|GO:0005524|GO:0017111|GO:0000166|GO:0003677|GO:0005515|GO:0005515|GO:0005515|GO:0005524|GO:0017111	chr7	99690547	99690596	CTGGCAGGTCAATGCTTCCCGGACACGGATCACTTTTGTCTGATTCCAGC
50487	0.0428822	0.00557892	1.23105	down	BUD13	84811	Homo sapiens BUD13 homolog (S. cerevisiae) (BUD13), mRNA.				chr11	116124332	116124381	GGGCTGTGGTAGTGGGCATAGGCAGCGAGATATCCAGTGGTAACAGTTGT
990136	1.42361e-05	1.45266e-07	1.68788	down	C12orf48	55010	Homo sapiens chromosome 12 open reading frame 48 (C12orf48), mRNA.		GO:0005634|GO:0005737	GO:0003677	chr12	101115233	101115282	ACACTTTCAGATAAGAGGTGTTTGCTGGGATGGAAGAACTACCTGGCATG
7040148	0.00551162	0.000350352	1.46029	up	WDR47	22911	Homo sapiens WD repeat domain 47 (WDR47), mRNA.				chr1	109315361	109315410	TTCCGCAGTGCTTTCAGTCTTCCATGTGAGCTCGTGCTGCTGTGACCTGC
7040315	0.0202541	0.00199022	1.23569	up	STX16	8675	Homo sapiens syntaxin 16 (STX16), transcript variant 1, mRNA.	GO:0006886|GO:0016192|GO:0006886|GO:0016192|GO:0006886|GO:0016192|GO:0016192|GO:0006886|GO:0016192|GO:0006886|GO:0006891|GO:0016192|GO:0042147	GO:0016020|GO:0016020|GO:0016020|GO:0016020|GO:0016020|GO:0000139|GO:0005737|GO:0005792|GO:0005794|GO:0016020|GO:0016021|GO:0031201	GO:0005484|GO:0005484|GO:0005484|GO:0005515|GO:0005484|GO:0005484	chr20	56687635	56687684	GTGCTGGCTGGGCCATGCTTGTGAAGTGATGTGTGTCTCTGATTTAACGG
5310471	4.74097e-09	3.76706e-12	2.23541	down	UBE2C	11065	Homo sapiens ubiquitin-conjugating enzyme E2C (UBE2C), transcript variant 6, mRNA.	GO:0043687|GO:0051246|GO:0006511|GO:0043687|GO:0051246|GO:0043687|GO:0051246|GO:0006511|GO:0043687|GO:0051246|GO:0006511|GO:0007049|GO:0007051|GO:0007067|GO:0008054|GO:0016567|GO:0031145|GO:0031536|GO:0043687|GO:0048015|GO:0051246|GO:0051301|GO:0051436|GO:0051436|GO:0051437	GO:0005654|GO:0005654|GO:0005654|GO:0005829|GO:0005829|GO:0005829|GO:0005829|GO:0005829	GO:0019787|GO:0016874|GO:0019787|GO:0019787|GO:0016874|GO:0019787|GO:0004842|GO:0016874	chr20	43875503	43877941	CCCTCATGAACCCAACATTGATAGTCCCTTGAACACACATGCTGCCGAGC
2750356	0.0333048	0.00395183	1.51057	up	COL6A2	1292	Homo sapiens collagen, type VI, alpha 2 (COL6A2), transcript variant 2C2, mRNA.	GO:0016337|GO:0030198	GO:0005576|GO:0005578|GO:0005737|GO:0005886	GO:0005201|GO:0030674	chr21	46370570	46376296	CTCTGCCCGGACCCTCAGATCGTGTGCCCAGACCTTCCCTGCCAAACAGA
2630673	3.57446e-05	4.90404e-07	1.62947	down	ASF1B	55723	Homo sapiens ASF1 anti-silencing function 1 homolog B (S. cerevisiae) (ASF1B), mRNA.	GO:0006333|GO:0006334|GO:0006350|GO:0006355|GO:0007275|GO:0007283|GO:0016568|GO:0030154	GO:0000785|GO:0005634	GO:0042393	chr19	14230475	14230524	TCCTCTGCTAGGACCAGGGTGATTTCAAGCCAGGGAAGCAACTGGGACCC
2690427	0.00111676	4.24155e-05	1.38472	up	TBC1D23	55773	Homo sapiens TBC1 domain family, member 23 (TBC1D23), mRNA.	GO:0032313	GO:0005622	GO:0005097	chr3	101512064	101517669	CTCCTGTGGATCGGCATGTGAGCAGCAGTGACAGAGTGGGCAAGCCTTAC
4490739	0.0340373	0.00407481	1.21665	up	PPAP2A	8611	Homo sapiens phosphatidic acid phosphatase type 2A (PPAP2A), transcript variant 2, mRNA.	GO:0006470|GO:0007205|GO:0008285|GO:0008354|GO:0019216|GO:0030521|GO:0046839	GO:0005624|GO:0005829|GO:0005886|GO:0005887	GO:0008195|GO:0008195|GO:0008195|GO:0016787	chr5	54822617	54822666	GCCAGGATGAAGGGAGACTGGGCAAGACTCTTACGCCCCACACTGCAATT
520446	0.00121606	4.71531e-05	1.83311	up	COMT	1312	Homo sapiens catechol-O-methyltransferase (COMT), transcript variant MB-COMT, mRNA.	GO:0006584|GO:0042420	GO:0005625|GO:0005737|GO:0005792|GO:0005829|GO:0005886|GO:0016021|GO:0043231	GO:0000287|GO:0005515|GO:0016206|GO:0016206|GO:0016740	chr22	18328774	18330060	AGCCAGAGGGCTGGAGCCTGCTCAGAGGTGCTTTGAAGATGCCGGAGGCC
6110392	0.0242414	0.00256693	1.22498	up	GNS	2799	Homo sapiens glucosamine (N-acetyl)-6-sulfatase (Sanfilippo disease IIID) (GNS), mRNA.	GO:0006027|GO:0008152	GO:0005764	GO:0005509|GO:0008449|GO:0016787	chr12	63393579	63393628	CCTGTGTTTGCATCCTCTGTTCCTATTCTGCCCTTGCTCTGTGTCATCTC
5130543	0.0249752	0.0026711	1.25021	up	SON	6651	Homo sapiens SON DNA binding protein (SON), transcript variant f, mRNA.	GO:0006916	GO:0005575|GO:0005622|GO:0005634|GO:0016607	GO:0003677|GO:0003725|GO:0005515|GO:0005515|GO:0005515	chr21	33851382	33851431	GCTAAGGCTGGTGTCCCTTTACCACCAAACCTAAAGCCTGCACCTCCACC
6040398	0.026588	0.00291095	1.22077	up	SLC22A4	6583	Homo sapiens solute carrier family 22 (organic cation/ergothioneine transporter), member 4 (SLC22A4), mRNA.	GO:0006641|GO:0006811|GO:0006814|GO:0007589|GO:0009437|GO:0015697|GO:0015879	GO:0005739|GO:0005886|GO:0005887	GO:0000166|GO:0005215|GO:0005524|GO:0008513|GO:0015075|GO:0015226|GO:0015293|GO:0031402	chr5	131663027	131663076	CCTCGGTGCTTACAACAGAATGCTGCCCTACATCGTCATGGGTAGTCTGA
5910543	0.00356233	0.00019776	1.33323	down	GLOD4	51031	Homo sapiens glyoxalase domain containing 4 (GLOD4), mRNA.		GO:0005739		chr17	609566	609615	GAGTGTCCAGAGGAAACAGAAAGGAATGAGTGTGTGACGTTGCTGCACGC
4860315	0.00699305	0.000478801	1.32639	down	TESK1	7016	Homo sapiens testis-specific kinase 1 (TESK1), mRNA.	GO:0006468|GO:0006468|GO:0007283		GO:0000166|GO:0004713|GO:0005524|GO:0016740|GO:0000166|GO:0000287|GO:0004674|GO:0004713|GO:0005515|GO:0005524|GO:0016740|GO:0030145	chr9	35599746	35599795	AGCCCGTGGTCTCAGGCCTCCAACTTTGGCCTTCAGGACACCCTGTAAGA
730739	0.00351291	0.000193528	1.32603	down	TCEAL3	85012	Homo sapiens transcription elongation factor A (SII)-like 3 (TCEAL3), transcript variant 2, mRNA.	GO:0006350|GO:0006355	GO:0005634		chrX	102751281	102751330	GATGAGAATATTGCTGGCCCTGCTTTCCCTGGTAGGTATTTGCCAGGCCC
4560719	0.02377	0.00249183	1.40724	up	EEF1G	1937	Homo sapiens eukaryotic translation elongation factor 1 gamma (EEF1G), mRNA. XM_935976 XM_935977 XM_935978 XM_935979	GO:0006414|GO:0006414	GO:0005622|GO:0005829|GO:0005853	GO:0003746|GO:0005515	chr11	62334880	62334929	CCCAGTTCCGGGCTGTCTTGGGCGAAGTGAAACTGTGTGAGAAGATGGCC
130138	1.06847e-05	9.9573e-08	1.63734	up	APCDD1L	164284	Homo sapiens adenomatosis polyposis coli down-regulated 1-like (APCDD1L), mRNA.		GO:0016020|GO:0016021		chr20	57034460	57034509	AGGGAAGCCCTTTTCCTCCCTGAGACTGTGTGGGGTTCAGTCAGCCTGCT
1500681	0.00580079	0.000371499	1.32095	down	LRRCC1	85444	Homo sapiens leucine rich repeat and coiled-coil domain containing 1 (LRRCC1), transcript variant 1, mRNA.			GO:0005515	chr8	86048174	86049723	TGGGGACATGAGCTGGCACAACAAGGATCTTCTCTAGCCCAAAATCGTGG
6770403	0.0133714	0.00113187	1.25436	up	EPM2AIP1	9852	Homo sapiens EPM2A (laforin) interacting protein 1 (EPM2AIP1), mRNA.		GO:0005783		chr3	37004507	37004556	GGTGCCCTTACTATCCATTCCCTATACACCCTGTTCTTTCCCAGACATAC
2120079	0.0112478	0.000907429	1.37819	down	EIF2AK2	5610	Homo sapiens eukaryotic translation initiation factor 2-alpha kinase 2 (EIF2AK2), mRNA.	GO:0006468|GO:0006412|GO:0006926|GO:0008285|GO:0009615|GO:0030968|GO:0044419|GO:0046777	GO:0005622|GO:0005622	GO:0000166|GO:0003725|GO:0004672|GO:0005524|GO:0000166|GO:0003725|GO:0004694|GO:0005515|GO:0005515|GO:0005515|GO:0005524|GO:0008601|GO:0016740	chr2	37187233	37187282	CGTTCTCTGCCTCACATAGCTTACAAGCCAGCTGGAGAAATATGGTACTC
6560373	0.0104513	0.000826966	1.2598	down	RAB24	53917	Homo sapiens RAB24, member RAS oncogene family (RAB24), transcript variant 1, mRNA.	GO:0006914|GO:0007264|GO:0015031|GO:0007264|GO:0007264|GO:0007264	GO:0005770|GO:0005783|GO:0005793|GO:0005794	GO:0000166|GO:0005525|GO:0000166|GO:0005525|GO:0000166|GO:0005525|GO:0000166|GO:0005525	chr5	176728551	176728600	TGGAACGGAGACAGCATTGGGCTGACTGTGGGCATGAGGAGGGATAAGGC
4810731	0.0388522	0.00487075	1.21919	up	ATP6V0A4	50617	Homo sapiens ATPase, H+ transporting, lysosomal V0 subunit a isoform 4 (ATP6V0A4), transcript variant 3, mRNA.	GO:0001503|GO:0006811|GO:0006885|GO:0007588|GO:0007605|GO:0015991|GO:0015992	GO:0005886|GO:0016021|GO:0016324|GO:0016471|GO:0031526	GO:0005515|GO:0008553	chr7	138109272	138109321	AACAGAGCTGCCTCCTGGCTCTTTGGGAGCCTGGGAGGAGAAGGAGCCGG
580431	0.00234553	0.00011381	1.36928	down	PRRX1	5396	Homo sapiens paired related homeobox 1 (PRRX1), transcript variant pmx-1a, mRNA.	GO:0006355|GO:0007275	GO:0005634	GO:0003700|GO:0003713|GO:0043565	chr1	168974817	168974866	GATGCCTTCTGGATCTTAAGCCAGTTGTCAGTGGAGGTCCTCAGGGCTGC
7380338	0.00101638	3.75798e-05	1.37429	down	UST	10090	Homo sapiens uronyl-2-sulfotransferase (UST), mRNA.	GO:0006477	GO:0000139|GO:0005794|GO:0016020|GO:0016021	GO:0008146|GO:0016740	chr6	149439344	149439393	ACTTACAGGGCCTTAATGTTATTTTGTCCCAGCCAACACCCTCTAGGTCC
3120136	0.0264711	0.00289137	1.23437	up	NFAT5	10725	Homo sapiens nuclear factor of activated T-cells 5, tonicity-responsive (NFAT5), transcript variant 5, mRNA.	GO:0001816|GO:0006355|GO:0045944|GO:0001816|GO:0006355|GO:0007165|GO:0007588|GO:0045944	GO:0005634|GO:0005737|GO:0005634|GO:0005634|GO:0005737	GO:0003700|GO:0003700|GO:0003702|GO:0005515	chr16	68286605	68286654	CCAGGCCAACCACAAAACGAGGGCCAGCCACCTGTGACAACACTTCTTTC
4250500	0.0304762	0.00351934	1.23494	up	HAT1	8520	Homo sapiens histone acetyltransferase 1 (HAT1), transcript variant 1, mRNA.	GO:0006323|GO:0006475	GO:0005634|GO:0005737	GO:0004402|GO:0005515|GO:0008415|GO:0016740|GO:0016740	chr2	172511499	172511548	TGACATTAGAACTTTCTTTCCTGAGTATACCCATCAACTCTTTGGGGATG
3420068	0.00344889	0.000189088	1.52118	down	HAT1	8520	Homo sapiens histone acetyltransferase 1 (HAT1), transcript variant 1, mRNA.	GO:0006323|GO:0006475	GO:0005634|GO:0005737	GO:0004402|GO:0005515|GO:0008415|GO:0016740|GO:0016740	chr2	172556438	172556487	GAACAGCTGGAAGAGAGTTTTCAGGAACTAGTGGAAGATTACCGGCGTGT
5270343	0.0350062	0.00422604	1.21723	down	IQCC	55721	Homo sapiens IQ motif containing C (IQCC), mRNA.				chr1	32446803	32446852	GTGTGGCTAAGGAGTTACCTGGGGGAAGTAGAATGAGAGGTCTGTTGGGA
4900753	0.0108585	0.000868546	1.27254	up	C12orf52	84934	Homo sapiens chromosome 12 open reading frame 52 (C12orf52), mRNA.				chr12	112114231	112114280	CTCTCCAGCCCTGTCTCAACCATACTCCAAATTAGTGCCAACCCAGGGGC
7400747	0.0485178	0.00669247	1.21939	down	FAM89A	375061	Homo sapiens family with sequence similarity 89, member A (FAM89A), mRNA.				chr1	229221889	229221938	GATCTCGGTGAAAGGCCTTAGTGGGTGTTTTGTGTGAGGTGGCTTGTAGC
4050438	0.0418309	0.00538946	1.24523	down	SIGMAR1	10280	Homo sapiens sigma non-opioid intracellular receptor 1 (SIGMAR1), transcript variant 2, mRNA.				chr9	34635129	34635178	AGAGGAGCTGCCTTTTGGAGGCCCCCTTCACCTGCAGCTATGATGCCCTT
510136	0.00480522	0.000291704	1.38427	down	SIGMAR1	10280	Homo sapiens sigma non-opioid intracellular receptor 1 (SIGMAR1), transcript variant 2, mRNA.				chr9	34635026	34635075	ATGCAAGTGCCCCTGTGGCTTGTCCCCAACCCCCTCAGCAACAAAGCTCA
2350142	0.00875717	0.000651164	1.29537	down	C2orf32	25927	Homo sapiens chromosome 2 open reading frame 32 (C2orf32), mRNA.			GO:0005515	chr2	68374157	68374206	GGCCCTGGCAGGCTTGTCCTGCTCTTGACCATTCCACTGACTAACTTTGG
3780451	0.0472402	0.00644366	1.2126	up	CORO1B	57175	Homo sapiens coronin, actin binding protein, 1B (CORO1B), transcript variant 1, mRNA.		GO:0005737|GO:0005856	GO:0003779|GO:0005515	chr11	67205913	67205962	AAGCTGGAGGAGGTGATGCAGGAGCTGCGGGCCCTGAGGGCGCTGGTCAA
1170689	0.00176642	7.99088e-05	1.45803	down	USP1	7398	Homo sapiens ubiquitin specific peptidase 1 (USP1), transcript variant 3, mRNA.	GO:0006281|GO:0006511	GO:0005634	GO:0004197|GO:0004221|GO:0008233	chr1	62689752	62689801	GTGCCTTGATTCACTTAGAAGTGTCTCAGAAAACCTGGACAGTTCGCTTC
3130022	0.0285823	0.00322039	1.29776	up	CHMP2A	27243	Homo sapiens chromatin modifying protein 2A (CHMP2A), transcript variant 2, mRNA.	GO:0015031	GO:0005768|GO:0016020|GO:0031902	GO:0019904	chr19	63758044	63758093	CCGGGTGTCCGGTGCCTCGCTTCTCCCTGGGACCCTGTCGTCAACATCGA
4560170	0.0207869	0.0020668	1.34869	up	SCAND1	51282	Homo sapiens SCAN domain containing 1 (SCAND1), transcript variant 1, mRNA.	GO:0006355	GO:0005634	GO:0003700|GO:0003713|GO:0042802	chr20	34542277	34542326	TCAAGGGTGACGCGAGCTCTGCCCTTTAACCGGAAACGTCTCCCTGCTCA
5050437	0.0194424	0.00188397	1.28074	up	SCAND1	51282	Homo sapiens SCAN domain containing 1 (SCAND1), transcript variant 1, mRNA.	GO:0006355	GO:0005634	GO:0003700|GO:0003713|GO:0042802	chr20	34541852	34541901	TCGGTCCCGAGACGTTCCGCCAGCGTTTCCGGCAGTTCCGCTACCAGGAT
3930377	0.0330412	0.00389255	1.2199	down	TRIM38	10475	Homo sapiens tripartite motif-containing 38 (TRIM38), mRNA.	GO:0043123	GO:0005575|GO:0005622	GO:0004871|GO:0005515|GO:0008270|GO:0046872	chr6	25985144	25985193	GCAACAGTTGTGTCTAGATGTCAGAGGCATGGCTGGGCCTCCATCTCTGC
1400465	0.0134442	0.00114445	1.26184	down	POFUT1	23509	Homo sapiens protein O-fucosyltransferase 1 (POFUT1), transcript variant 1, mRNA.	GO:0001525|GO:0001756|GO:0005975|GO:0006004|GO:0007219|GO:0007399|GO:0007507|GO:0009790|GO:0016266|GO:0045449	GO:0005783|GO:0016020|GO:0016020	GO:0016757|GO:0030145|GO:0046922	chr20	30289282	30289331	CTAGACTAGGACTCCAGTGCCCTCCTCTCCCAAGAGACAAAGGCCATTGC
290348	0.0174659	0.00162928	1.31139	down	POFUT1	23509	Homo sapiens protein O-fucosyltransferase 1 (POFUT1), transcript variant 1, mRNA.	GO:0001525|GO:0001756|GO:0005975|GO:0006004|GO:0007219|GO:0007399|GO:0007507|GO:0009790|GO:0016266|GO:0045449	GO:0005783|GO:0016020|GO:0016020	GO:0016757|GO:0030145|GO:0046922	chr20	30289711	30289760	AATAATAGCCAGGCGTGGTGGCACATGCCTGTATTCCCAGCTGCTTGGGA
4220544	0.0353826	0.00428835	1.22002	down	FAM54A	113115	Homo sapiens family with sequence similarity 54, member A (FAM54A), transcript variant 1, mRNA.				chr6	136602470	136602519	CCTCAGTTTTCATCTCTCCAGCCACCGTGTTTTCCTCCCGTACAACCAGG
7000743	8.50877e-05	1.50452e-06	1.50186	down	ZWILCH	55055	Homo sapiens Zwilch, kinetochore associated, homolog (Drosophila) (ZWILCH), transcript variant 2, transcribed RNA.	GO:0007049|GO:0007067|GO:0007093|GO:0051301	GO:0000777	GO:0005515	chr15	64628582	64628631	AGGCACTGGACATCCTCACGTGGAGTTCACAGGCTCATCAGTGAATTCTG
6420747	0.00970533	0.000744943	1.32057	up	TSPAN4	7106	Homo sapiens tetraspanin 4 (TSPAN4), transcript variant 2, mRNA.	GO:0006461	GO:0005886|GO:0005887|GO:0016020|GO:0016021	GO:0005515|GO:0005515	chr11	834127	834176	AGTAACGGTGGCCTGGGGTCAGAGCCAGGTTCAGCTGCGAGGCTGCTGGT
7150274	0.00120876	4.68059e-05	1.46942	down	SP3	6670	Homo sapiens Sp3 transcription factor (SP3), transcript variant 2, mRNA.	GO:0001779|GO:0006350|GO:0006355|GO:0030183|GO:0030217|GO:0030218|GO:0030224|GO:0030851	GO:0005622|GO:0005634|GO:0005634|GO:0005634	GO:0003677|GO:0003682|GO:0003690|GO:0005515|GO:0005515|GO:0008270|GO:0016563|GO:0016564|GO:0046872	chr2	174773787	174773836	GCAGTGATTTTTATCCAATCTTGTTTCCAAAAACCATGTCTCCCAGGGCC
1230593	0.0170043	0.00157271	1.37752	down	SP3	6670	Homo sapiens Sp3 transcription factor (SP3), transcript variant 2, mRNA.	GO:0001779|GO:0006350|GO:0006355|GO:0030183|GO:0030217|GO:0030218|GO:0030224|GO:0030851	GO:0005622|GO:0005634|GO:0005634|GO:0005634	GO:0003677|GO:0003682|GO:0003690|GO:0005515|GO:0005515|GO:0008270|GO:0016563|GO:0016564|GO:0046872	chr2	174773391	174773440	AGAGCTATACAGTTTTCCTAAATGTATACCTGTAACTGCAGCAGTTCACC
840014	0.000244711	5.71658e-06	1.42332	down	TPMT	7172	Homo sapiens thiopurine S-methyltransferase (TPMT), mRNA.	GO:0006139|GO:0008152	GO:0005737	GO:0008119|GO:0008168|GO:0016740	chr6	18236681	18236730	AAACACCCTGTGTCCATGGGATAGAGTCCTTTCCGCTTGCAGTTGTGCCC
6020333	0.0216913	0.00217855	1.26396	up	ADSS	159	Homo sapiens adenylosuccinate synthase (ADSS), mRNA.	GO:0002376|GO:0006164|GO:0006167|GO:0006167|GO:0006167	GO:0005575|GO:0005737	GO:0000166|GO:0000287|GO:0004019|GO:0004019|GO:0005525|GO:0005525|GO:0016874|GO:0042301|GO:0042301	chr1	244580969	244581018	GTTTGGTGTAACTACTGGAAGGAAAAGAAGATGTGGCTGGTTGGACCTCG
2760768	0.000828142	2.801e-05	1.41592	up	TNRC6B	23112	Homo sapiens trinucleotide repeat containing 6B (TNRC6B), transcript variant 2, mRNA.		GO:0005634|GO:0005737|GO:0005794|GO:0005813|GO:0005634|GO:0005737|GO:0005794|GO:0005813	GO:0000166|GO:0000166	chr22	39061214	39061263	CTAGGCACTTTAGAGGTGCACTTGCATGGCAGGCTGGGCCCCCTTTTCTA
1030674	0.025168	0.00270772	1.22766	up	STT3B	201595	Homo sapiens STT3, subunit of the oligosaccharyltransferase complex, homolog B (S. cerevisiae) (STT3B), mRNA.	GO:0006486	GO:0005783|GO:0005789|GO:0016020|GO:0016021	GO:0004579|GO:0016740	chr3	31638331	31638617	GACTATTTTACCCCACAGGGAGAATTCCGTGTAGACAAAGCAGGATCCCC
4590139	0.0133855	0.00113396	1.24938	down	XRCC1	7515	Homo sapiens X-ray repair complementing defective repair in Chinese hamster cells 1 (XRCC1), mRNA.	GO:0000012	GO:0005622|GO:0005634|GO:0005654	GO:0003684|GO:0005515|GO:0005515	chr19	48739464	48739619	ATCCCAGCTTTGAGGAGGCCCTGATGGACAACCCCTCCCTGGCATTCGTT
3120142	0.0224558	0.00228508	1.25298	up	SULT1A3	6818	Homo sapiens sulfotransferase family, cytosolic, 1A, phenol-preferring, member 3 (SULT1A3), transcript variant 1, mRNA.	GO:0006584|GO:0006629|GO:0008202	GO:0005737	GO:0004062|GO:0016740	chr16	30113975	30114024	TTTGATGACGCGGAGCCTGAGCCAGACCAGGGGGATCCAGGGGCCTGCTG
4490180	0.0156829	0.00140479	1.25946	up	BEXL1	56271	PREDICTED: Homo sapiens brain expressed X-linked-like 1 (BEXL1), mRNA.							AAATGTAGGACCTATCGTCCAGACTCACAGAGTGGGGCTCCAGAATCTCC
3170300	0.00603317	0.000390855	1.35617	down	MTSS1	9788	Homo sapiens metastasis suppressor 1 (MTSS1), mRNA.	GO:0006928|GO:0007155|GO:0007165|GO:0007169|GO:0007399|GO:0030036|GO:0045786|GO:0046847	GO:0001726|GO:0005737|GO:0015629|GO:0030139	GO:0003785|GO:0005102	chr8	125632315	125632364	TTGTGCTTTAGTTGCTAGTTTGTACTGAGAGTTGACCTCTCCCTGTGCAG
510767	0.0425567	0.00551402	1.24875	up	ZNF331	55422	Homo sapiens zinc finger protein 331 (ZNF331), transcript variant 3, mRNA.	GO:0006350|GO:0006355	GO:0005622|GO:0005634	GO:0003677|GO:0008270|GO:0046872	chr19	54083340	54083389	AGGCTGATTTCAGATGTCTCACCACAAAGAAGGAGGATAAGGGAGCGAGG
940477	5.2104e-05	8.0041e-07	1.88125	up	RETSAT	54884	Homo sapiens retinol saturase (all-trans-retinol 13,14-reductase) (RETSAT), mRNA.	GO:0042572|GO:0055114	GO:0005640|GO:0005783|GO:0005789|GO:0016020	GO:0009055|GO:0016491|GO:0051786	chr2	85423299	85423348	GATCTCTTTTGTGCTGGGTTCAGTGGCTCTTCAGGGGACAGGAAATGCCT
4070180	0.0298377	0.00341299	1.23411	up	PRRT3	285368	Homo sapiens proline-rich transmembrane protein 3 (PRRT3), mRNA.		GO:0016020|GO:0016021		chr3	9987315	9987364	GCGGAATACAGGGTGGGTGTGCATGGATTCGGGCATGAAGAACAGGGAGC
6520386	0.0137285	0.00117301	1.32729	up	LDHA	3939	Homo sapiens lactate dehydrogenase A (LDHA), transcript variant 1, mRNA.	GO:0019642|GO:0044262|GO:0055114|GO:0019642|GO:0044262|GO:0055114	GO:0005737|GO:0005737|GO:0005829	GO:0004459|GO:0005488|GO:0016491|GO:0004459|GO:0004459|GO:0005515|GO:0005515|GO:0005515|GO:0016491	chr11	18429687	18429736	TGTCACTATAGGGAACACAGATTTTTGAGATCTTGTCCTCTGGAAGCTGG
4640239	0.0296393	0.00337717	1.262	down	UPF3B	65109	Homo sapiens UPF3 regulator of nonsense transcripts homolog B (yeast) (UPF3B), transcript variant 2, mRNA.	GO:0000184|GO:0000398|GO:0006810|GO:0051028	GO:0005634|GO:0005737	GO:0000166|GO:0003723|GO:0005487|GO:0005515	chrX	118968080	118968129	GTGTTTGATCTTAGGTCTCATGATCTGAGTGCATACCCTCTCCAGGAAGG
6550048	0.00929	0.000702237	1.29502	down	DHCR7	1717	Homo sapiens 7-dehydrocholesterol reductase (DHCR7), mRNA.	GO:0001568|GO:0006695|GO:0009791|GO:0030154|GO:0030324|GO:0035264|GO:0042127|GO:0055114	GO:0005640|GO:0005783|GO:0005789|GO:0005789|GO:0016020|GO:0016021	GO:0005515|GO:0016491|GO:0047598|GO:0047598	chr11	70823473	70823522	AAAGGGGCTTTCATGTCGTTTCCTTCCTGCTCCTGCTGCACAGCTGCCAG
7040014	0.00846538	0.000621518	1.40084	up	CRK	1398	Homo sapiens v-crk sarcoma virus CT10 oncogene homolog (avian) (CRK), transcript variant II, mRNA.	GO:0006357|GO:0007242|GO:0030036	GO:0005634|GO:0005737|GO:0005768|GO:0005829|GO:0005886	GO:0005515|GO:0005515|GO:0005515|GO:0005515|GO:0005515|GO:0005515|GO:0005515|GO:0005515|GO:0005515|GO:0005515|GO:0042169|GO:0045309	chr17	1339923	1339972	GCCAGGGTTATCCAGAAGCGAGTCCCCAATGCCTACGACAAGACAGCCTT
3140452	0.0476273	0.00653179	1.24652	down	POLR3A	11128	Homo sapiens polymerase (RNA) III (DNA directed) polypeptide A, 155kDa (POLR3A), mRNA.	GO:0006351	GO:0005634|GO:0005666	GO:0000287|GO:0003677|GO:0003899|GO:0008270|GO:0016740|GO:0016779	chr10	79736279	79736328	CCCGGGGTAGCCATTGGTTCTTGGATCTGTGTTAGAATGAGTGCTTTCCC
7570711	0.00429226	0.000251924	1.33355	down	PRR14	78994	Homo sapiens proline rich 14 (PRR14), mRNA.				chr16	30575136	30575185	GCCCCATCTGTTGGTCATCCATCCTGAAGGGACAGGAAACCTCCCAGGCA
3420373	9.10654e-05	1.6353e-06	1.72774	up	SOD2	6648	Homo sapiens superoxide dismutase 2, mitochondrial (SOD2), nuclear gene encoding mitochondrial protein, transcript variant 3, mRNA.	GO:0000303|GO:0001315|GO:0001836|GO:0006302|GO:0006357|GO:0006801|GO:0006979|GO:0042542|GO:0043066|GO:0055114|GO:0000303|GO:0001315|GO:0001836|GO:0006302|GO:0006357|GO:0006801|GO:0006979|GO:0042542|GO:0043066|GO:0055114	GO:0005739|GO:0005743|GO:0005759|GO:0005739|GO:0005743	GO:0004784|GO:0016491|GO:0030145|GO:0046872|GO:0004784|GO:0016491|GO:0046872	chr6	160113772	160113821	TACGACTACGGCGCCCTGGAACCTCACATCAACGCGCAGATCATGCAGCT
6450300	0.0179174	0.00168563	1.23561	down	GEMIN4	50628	Homo sapiens gem (nuclear organelle) associated protein 4 (GEMIN4), mRNA.	GO:0000387|GO:0006364|GO:0006397|GO:0008380	GO:0005634|GO:0005654|GO:0005681|GO:0005730|GO:0005737|GO:0005829|GO:0030532	GO:0005515	chr17	648004	648053	GCTTCTTACCTGTGCGGGAGCGAAAAAGCTGGGCTTCAACATGGCAGGTC
6620184	0.0451252	0.00600579	1.19915	up	CNNM2	54805	Homo sapiens cyclin M2 (CNNM2), transcript variant 3, mRNA.	GO:0006811	GO:0016020|GO:0016021		chr10	104677187	104677236	AGGATGTCTATACAGAGGGATAAAAAGGGGTGGCAGTTGGCTGGGCGTGG
4200441	0.0154057	0.00136855	1.24651	up	SEC14L1	6397	Homo sapiens SEC14-like 1 (S. cerevisiae) (SEC14L1), transcript variant 1, mRNA.	GO:0006810	GO:0005622|GO:0005794|GO:0016020	GO:0005215|GO:0005488	chr17	72721767	72721816	CGCCCACCCAGCGGCGACATTGTACAGACTCCTCTCACCTCTAGATAGCA
7380546	0.0381	0.00474686	1.24196	up	FXYD5	53827	Homo sapiens FXYD domain containing ion transport regulator 5 (FXYD5), transcript variant 2, mRNA.	GO:0006811|GO:0030033|GO:0046588	GO:0016020|GO:0016021	GO:0003779|GO:0005216|GO:0045296	chr19	40352545	40352594	AAGGCTACCTGGCGCCTTGGGGGCTGTCCCTCAAGTTATCTCCTCTGCTA
1770520	0.00168865	7.30813e-05	1.34915	down	CYC1	1537	Homo sapiens cytochrome c-1 (CYC1), mRNA.	GO:0006810|GO:0022900	GO:0005739|GO:0005746|GO:0016020|GO:0016021	GO:0005506|GO:0020037|GO:0045155|GO:0046872	chr8	145152249	145152298	GTGTCTGCTTGCCATCCTGCCAGAACAGGCCCTCAAGCCCAAGAGCCATC
110064	0.048609	0.00671792	1.20538	up	RNASEL	6041	Homo sapiens ribonuclease L (2',5'-oligoisoadenylate synthetase-dependent) (RNASEL), mRNA.	GO:0006397|GO:0006468	GO:0005575|GO:0005737|GO:0005739	GO:0000166|GO:0003723|GO:0004672|GO:0005524|GO:0008270|GO:0016787|GO:0016891|GO:0046872	chr1	182543027	182543076	GGTGCTAAGTCTGATGTTCTTTCCATGAATCATTGTGGTGGTTGAGATGG
1820682	0.00524439	0.000325586	1.3029	up	RNASEL	6041	Homo sapiens ribonuclease L (2',5'-oligoisoadenylate synthetase-dependent) (RNASEL), mRNA.	GO:0006397|GO:0006468	GO:0005575|GO:0005737|GO:0005739	GO:0000166|GO:0003723|GO:0004672|GO:0005524|GO:0008270|GO:0016787|GO:0016891|GO:0046872	chr1	182543360	182543409	GCTCCTCACGGGCGATGGCTGTCTTTTCTTGACTTTGTATCTTCACTGCC
4290170	0.0257276	0.00278563	1.34768	up	PRKAR2A	5576	Homo sapiens protein kinase, cAMP-dependent, regulatory, type II, alpha (PRKAR2A), mRNA.	GO:0001932|GO:0007165|GO:0001932|GO:0009755	GO:0005952|GO:0005624|GO:0005737|GO:0005886|GO:0005952	GO:0000166|GO:0008603|GO:0016301|GO:0000166|GO:0008603|GO:0030552	chr3	48788903	48788952	GGGTCTGGAGGGTTGCTATCACTTTGTCCAGCCCAAATACCTTCCTGGGC
6940255	2.09915e-05	2.42132e-07	1.63215	up	PLSCR3	57048	Homo sapiens phospholipid scramblase 3 (PLSCR3), mRNA.	GO:0017121|GO:0042593|GO:0042632	GO:0005886|GO:0016021	GO:0005509|GO:0017124|GO:0017128	chr17	7293131	7293180	GGGCCCTGCCTTCAGCTGGTGCTTGCTGCGATTCCTGTGCCTTATGTAAC
6220164	0.000106942	2.05635e-06	1.54365	down	CENTG3	116988	Homo sapiens centaurin, gamma 3 (CENTG3), mRNA.	GO:0007264|GO:0032312|GO:0032312|GO:0032312	GO:0005622|GO:0005737	GO:0000166|GO:0005525|GO:0008060|GO:0008270|GO:0046872|GO:0008060|GO:0008270|GO:0008060|GO:0008270	chr7	150472155	150472204	AGGGATTTAGCCCTCTGCCCTAAGGTGCCATTGAAAAGGGACAGGACCCT
2060040	0.0144872	0.00125702	1.26133	down	ADORA2B	136	Homo sapiens adenosine A2b receptor (ADORA2B), mRNA.	GO:0000187|GO:0006968|GO:0007165|GO:0007186|GO:0007190|GO:0007254|GO:0007588	GO:0005886|GO:0005887	GO:0001609|GO:0004872	chr17	15819473	15819522	CACAAGGAAATGGACTGCCTCTCTTGAGCACTTCCCTGGAGCTACCACGT
5890131	0.00528188	0.000328929	1.28163	down	PDXK	8566	Homo sapiens pyridoxal (pyridoxine, vitamin B6) kinase (PDXK), mRNA.	GO:0008615|GO:0008283|GO:0008615|GO:0042816|GO:0042823|GO:0042823|GO:0042823	GO:0005737	GO:0008478|GO:0000166|GO:0000287|GO:0005524|GO:0005524|GO:0008270|GO:0008478|GO:0008478|GO:0008478|GO:0016740|GO:0030170|GO:0030955|GO:0030955|GO:0031402|GO:0031402|GO:0031403|GO:0042803|GO:0042803	chr21	44006485	44006534	GGCCCTGCTTGTGCCATGTGGATGTTTGTGAGCCTCGGTCCTACAGCACT
1660681	0.0453697	0.00606355	1.20522	up	CCDC102A	92922	Homo sapiens coiled-coil domain containing 102A (CCDC102A), mRNA.				chr16	56103755	56103804	GGAGCCCCACCCTGGGCTGCCTCTCTAGGCTTCGCTGTTCATCATACAAT
5960274	0.040275	0.00510531	1.2356	up	NCKAP1	10787	Homo sapiens NCK-associated protein 1 (NCKAP1), transcript variant 1, mRNA.	GO:0006915|GO:0007417	GO:0005886|GO:0016021|GO:0042995	GO:0005515|GO:0005515|GO:0005515	chr2	183793547	183793596	TTGCCTGCCTTCTCATGGTGTTTGTGGCAGTTTCTTTGCCAACACTGGCC
6400386	0.00113299	4.33318e-05	1.40195	up	MAP4K2	5871	Homo sapiens mitogen-activated protein kinase kinase kinase kinase 2 (MAP4K2), mRNA.	GO:0006468|GO:0006468|GO:0006903|GO:0006950|GO:0006955|GO:0007243|GO:0007254	GO:0005737|GO:0043231|GO:0000139|GO:0005625|GO:0005737|GO:0005794|GO:0005886|GO:0016323	GO:0000166|GO:0004674|GO:0005083|GO:0005524|GO:0000166|GO:0004674|GO:0005083|GO:0005515|GO:0005524|GO:0016740	chr11	64556660	64556709	TTTCCTTTCTACTCTTTCTGCCAAGAGCCTGCCCCTGCATTTGTCCTGGG
5290577	0.0416696	0.00535935	1.22073	up	TCEA2	6919	Homo sapiens transcription elongation factor A (SII), 2 (TCEA2), transcript variant 1, mRNA.	GO:0006350|GO:0006354|GO:0006357|GO:0006350|GO:0006350|GO:0006357|GO:0006354|GO:0006357	GO:0005634|GO:0005634|GO:0005634|GO:0005634|GO:0008023	GO:0003677|GO:0003702|GO:0003711|GO:0003746|GO:0005515|GO:0008270|GO:0003677|GO:0003746|GO:0005515|GO:0030528|GO:0003677|GO:0003711|GO:0003746|GO:0005515|GO:0003677|GO:0003702|GO:0003711|GO:0003746|GO:0005515|GO:0005515|GO:0008270|GO:0046872	chr20	62165093	62165142	TCGCTGCTCCTGAGGCGATGATGGGCAAGGAAGAGGAGATTGCGCGGATC
2650167	0.0016635	7.15842e-05	1.35222	down	ALG3	10195	Homo sapiens asparagine-linked glycosylation 3 homolog (S. cerevisiae, alpha-1,3-mannosyltransferase) (ALG3), mRNA.	GO:0006486	GO:0005783|GO:0005789|GO:0016020|GO:0016021	GO:0000033|GO:0004584|GO:0016757	chr3	185442994	185443043	CCCGCAGCCTTTCCCCAAGAGCACCCAACACAGCAAGAAAGCCCACTGAA
3460132	0.0239416	0.00252377	1.24545	down	PAQR4	124222	Homo sapiens progestin and adipoQ receptor family member IV (PAQR4), mRNA.		GO:0016020|GO:0016021	GO:0004872	chr16	2963395	2963444	CTTCCATCTGGCTGCACTCCAAGGCCCCCTCTGTCCTTTTCAGAACACAT
2680044	0.00451602	0.000268885	1.3218	up	RAB27A	5873	Homo sapiens RAB27A, member RAS oncogene family (RAB27A), transcript variant 4, mRNA.	GO:0006605|GO:0007264|GO:0007596|GO:0015031|GO:0016192|GO:0030318|GO:0032400|GO:0032402|GO:0043316|GO:0043320|GO:0043473	GO:0001750|GO:0005737|GO:0005794|GO:0016020|GO:0030141|GO:0030425|GO:0042470	GO:0000166|GO:0003924|GO:0005515|GO:0005525|GO:0031489	chr15	55496977	55497026	GAGCAACCAAAGTGGGACTTCTGTCTCCCCGCTATATTCCCATTGCTCTG
1240541	0.00193829	8.97031e-05	1.61869	up	RBM4	5936	Homo sapiens RNA binding motif protein 4 (RBM4), mRNA.	GO:0006397|GO:0008380|GO:0016068	GO:0005634|GO:0005737	GO:0000166|GO:0003723|GO:0008270|GO:0046872	chr11	66167523	66167572	CGAATGCACGTGCAGTTGTCCACCAGCCGGCTTAGGACTGCGCCCGGGAT
3190010	0.0443685	0.00584983	1.29964	up	POTEE	445582	Homo sapiens POTE ankyrin domain family, member E (POTEE), mRNA.				chr2	131737604	131737653	TGATGATACCGCCGTGCTCGTCATTGACAACGGCTCTGGCATGTGCAAGG
7200719	0.0225774	0.00230089	1.31207	down	INTS3	65123	Homo sapiens integrator complex subunit 3 (INTS3), mRNA.	GO:0016180	GO:0005634|GO:0032039	GO:0005515	chr1	152012871	152012920	GGGCATCTATGACGTGGTCAGGGTGTCCATTCCTAATCATGGGGCAGATG
5340136	0.00013861	2.84152e-06	1.47772	up	GALNT9	50614	Homo sapiens UDP-N-acetyl-alpha-D-galactosamine:polypeptide N-acetylgalactosaminyltransferase 9 (GalNAc-T9) (GALNT9), mRNA.	GO:0006493	GO:0000139|GO:0005794|GO:0016020|GO:0016021	GO:0004653|GO:0005509|GO:0005515|GO:0005529|GO:0016757|GO:0030145|GO:0005515	chr12	131247063	131247112	AAGAGGGGTGCTGGAGGACATGGACAGCGACAAACCTGAGGCCGTGTCTA
6940408	0.00354454	0.000196397	1.36936	down	COBRA1	25920	Homo sapiens cofactor of BRCA1 (COBRA1), mRNA.	GO:0006355|GO:0016481	GO:0005634|GO:0005654|GO:0005737	GO:0005515	chr9	139287552	139287601	AAAGCGAGGCACACTGCTTACTGCCTTGGGGTTGTGGAGATGGACCCGTG
6380044	0.0328126	0.00385345	1.3013	up	COBRA1	25920	Homo sapiens cofactor of BRCA1 (COBRA1), mRNA.	GO:0006355|GO:0016481	GO:0005634|GO:0005654|GO:0005737	GO:0005515	chr9	139277323	139277372	TGACGCGGATGGTGGGGAAGAACGTGAAGCTGTACGACATGGTGCTGCAG
6860113	0.0121221	0.000997871	1.31176	down	COBRA1	25920	Homo sapiens cofactor of BRCA1 (COBRA1), mRNA.	GO:0006355|GO:0016481	GO:0005634|GO:0005654|GO:0005737	GO:0005515	chr9	139287401	139287450	CCAGGGCAGAGCCTCTCCTTGTACTTTGGCAGCCATAGAAAGCGTGCTCA
6370025	0.000301897	7.40016e-06	1.49026	up	EPN1	29924	Homo sapiens epsin 1 (EPN1), mRNA.	GO:0006897	GO:0005634|GO:0005737|GO:0005886|GO:0005886|GO:0005886|GO:0005886|GO:0005905	GO:0008289	chr19	60898855	60898904	CCCTCACGCACCCGCTCACGCACCCTCGGTGAATCCTTGGTGATGATTTT
2120678	0.000302762	7.50569e-06	1.47436	down	MLF1IP	79682	Homo sapiens MLF1 interacting protein (MLF1IP), mRNA.	GO:0006350|GO:0006355|GO:0044419	GO:0000775|GO:0000777|GO:0005634|GO:0005694|GO:0005737		chr4	185852388	185852437	CAGTTCTGTGCACATACTTTTCAATACTCCCCGACGGAAGAGCAAGGGTG
3780041	0.00312868	0.000166892	1.3179	down	TIAF1	9220	Homo sapiens TGFB1-induced anti-apoptotic factor 1 (TIAF1), mRNA.	GO:0006915|GO:0006916|GO:0007249	GO:0005634	GO:0003674	chr17	24426748	27400582	CCCCTGTTTACCCGATGTATGGAAATAAAGGCCCTTTTCCTCCTGAAAAA
2370072	0.000530206	1.58685e-05	1.42195	down	PRR11	55771	Homo sapiens proline rich 11 (PRR11), mRNA.				chr17	54629932	54633754	GCTGGCTCACCCTAGAAGCCCAACTCCAACTCTGCCACTTTCTACAAGCA
620376	0.00834975	0.000609048	1.26673	down	PPP1R11	6992	Homo sapiens protein phosphatase 1, regulatory (inhibitor) subunit 11 (PPP1R11), mRNA.		GO:0005625	GO:0004864|GO:0005515	chr6	30037919	30037968	CCTAGACTTTGATTTCTCCGGCAGCCCAGATGTTCAGTTCTCTTGGCCCC
830608	0.00708926	0.000489692	1.29773	up	PSMC1	5700	Homo sapiens proteasome (prosome, macropain) 26S subunit, ATPase, 1 (PSMC1), mRNA.	GO:0030163|GO:0031145|GO:0051436|GO:0051437	GO:0000502|GO:0005634|GO:0005730|GO:0005737|GO:0005829	GO:0000166|GO:0005515|GO:0005524|GO:0016787|GO:0016887	chr14	89792690	89795298	GCAAGATGGGTCAAAGTCAGAGTGGTGGTCATGGTCCTGGAGGTGGCAAG
610392	0.00961825	0.000736221	1.2599	down	RBPMS	11030	Homo sapiens RNA binding protein with multiple splicing (RBPMS), transcript variant 3, mRNA.	GO:0006396		GO:0000166|GO:0003723|GO:0005515|GO:0005515	chr8	30361653	30361702	TGCACTTTACCCCAGTAGCCCTGAAGTGTGGGCCCCGTACCCTCTGTACC
7150128	1.27512e-05	1.24935e-07	1.5486	down	SGOL1	151648	Homo sapiens shugoshin-like 1 (S. pombe) (SGOL1), transcript variant C1, mRNA.	GO:0007049|GO:0007067|GO:0045132|GO:0051301	GO:0000775|GO:0005634|GO:0030892	GO:0005515	chr3	20212537	20212586	CCTAAACGTAGGTGCACAGCCAGCGTGAACTATAAGGAGCCCACCCTCGC
2490682	0.0367375	0.00451677	1.26725	up	ANXA8	653145	Homo sapiens annexin A8 (ANXA8), mRNA. XM_931361 XM_931369 XM_931374 XM_931375 XM_931378 XM_931383 XM_931388 XM_931391 XM_931399 XM_931404 XM_931411	GO:0007596		GO:0005509|GO:0005544|GO:0005509|GO:0005544	chr10	47882230	47882279	GGCCCTTATGTACCCGCCATACAGATACGAAGCCAAGGAGCTGCATGACG
4220672	0.00373538	0.000211324	1.31971	up	MT1F	4494	Homo sapiens metallothionein 1F (MT1F), mRNA.	GO:0008150	GO:0005737	GO:0046872|GO:0005507|GO:0008270|GO:0046870|GO:0046872	chr16	55250565	55250614	CTGCTGCGACTGATGCCAGGACAACCTTTCTCCCAGATGTAAACAGAGAG
6940053	0.00652528	0.000435512	1.32425	up	NTNG1	22854	Homo sapiens netrin G1 (NTNG1), transcript variant 3, mRNA.	GO:0007275|GO:0007399|GO:0007409|GO:0030154	GO:0005578|GO:0005886|GO:0046658|GO:0005578|GO:0005578	GO:0005515	chr1	107824987	107825036	CACTGTGCAGAGATTTCTCTGTAAGGGCAACGAACGTGCTGGCATCAAAG
3310167	0.00611602	0.000398221	1.62809	up	SDF4	51150	Homo sapiens stromal cell derived factor 4 (SDF4), mRNA.		GO:0005794|GO:0005796	GO:0005509|GO:0005509	chr1	1142866	1142915	ATGAACGAGTACAACGCGCTGAACGAGGCCAAGCAGATGATCGCCGTCGC
2360445	0.024721	0.00263445	1.24946	up	NHP2L1	4809	Homo sapiens NHP2 non-histone chromosome protein 2-like 1 (S. cerevisiae) (NHP2L1), transcript variant 1, mRNA.	GO:0042254|GO:0000398|GO:0008380|GO:0042254	GO:0030529|GO:0005634|GO:0005681|GO:0005730	GO:0003723	chr22	42078362	42078411	ACGCGTGGTATCCTCGCGGTGTCCGGCAAGAGACTACCAAGACAGACGCT
6940088	0.0311755	0.00362156	1.25095	up	DGKA	1606	Homo sapiens diacylglycerol kinase, alpha 80kDa (DGKA), transcript variant 4, mRNA.	GO:0007205|GO:0007242	GO:0005829|GO:0005886	GO:0004143|GO:0004143|GO:0005509|GO:0005543|GO:0008270|GO:0016740|GO:0019992	chr12	54632977	54633133	GTACCAGACCTAAGTGACAAGAGACTGGAAGTGGTTGGGCTGGAGGGTGC
360471	0.00675016	0.000456972	1.44655	up	MAP3K7	6885	Homo sapiens mitogen-activated protein kinase kinase kinase 7 (MAP3K7), transcript variant D, mRNA.	GO:0002726|GO:0006468|GO:0007179|GO:0007250|GO:0032743|GO:0050852|GO:0050870	GO:0005829|GO:0005829|GO:0005829|GO:0005829	GO:0000166|GO:0000287|GO:0004674|GO:0004709|GO:0005515|GO:0005524|GO:0016740	chr6	91302812	91313717	CTAGGATCGCCGCAACCACAGGCAACGGACAGCCAAGACGTAGATCCATC
4890563	0.0306886	0.00355483	1.22728	down	TMEM54	113452	Homo sapiens transmembrane protein 54 (TMEM54), mRNA.	GO:0008150	GO:0005575|GO:0016020|GO:0016021	GO:0003674	chr1	33360368	33360417	TCTGACCCTCTGAGAGATGATGTCCTGCCCAGGCCCGATGGCCACTAGGA
5360338	0.0370064	0.00455376	1.32913	up	SNX22	79856	Homo sapiens sorting nexin 22 (SNX22), mRNA.	GO:0007154|GO:0015031		GO:0005515|GO:0035091	chr15	62236595	62236644	GACACAGGCATAGCTGCAGAGGAGAAAGCAGCCAGAGATGTGTGGGGAGG
1240750	0.000105433	2.01272e-06	1.55896	down	SNTB2	6645	Homo sapiens syntrophin, beta 2 (dystrophin-associated protein A1, 59kDa, basic component 2) (SNTB2), transcript variant 1, mRNA.		GO:0005624|GO:0005737|GO:0005856|GO:0005874|GO:0016010|GO:0016020|GO:0030054|GO:0031410|GO:0045202	GO:0003779|GO:0005509|GO:0005516	chr16	67891156	67892262	TTGGTGGTCCCGAGGGAGAACTGACCATGGACCTGCACTCTTGTCCGAAG
3360431	0.000696193	2.25697e-05	1.77194	up	ZAK	51776	Homo sapiens sterile alpha motif and leucine zipper containing kinase AZK (ZAK), transcript variant 1, mRNA.				chr2	173790175	173790224	GACGTTTAAAGATGTGGGAGCAAAAGCTGACAGAGCAGTCCAACACCCCG
3190102	0.000125139	2.5057e-06	1.56093	down	DSN1	79980	Homo sapiens DSN1, MIND kinetochore complex component, homolog (S. cerevisiae) (DSN1), mRNA.	GO:0007049|GO:0007059|GO:0007067|GO:0051301	GO:0000444|GO:0005634|GO:0005737	GO:0005515	chr20	34814159	34814208	GCATGGCTCTGAAGGTGATTTTAGGTAGAAGAGTTTTGAGGCTGGGCGCA
780762	0.00734629	0.000510948	1.29616	up	CSNK1D	1453	Homo sapiens casein kinase 1, delta (CSNK1D), transcript variant 1, mRNA.	GO:0006281|GO:0006468|GO:0007165|GO:0016055	GO:0005737	GO:0000166|GO:0004674|GO:0005515|GO:0005524|GO:0016740	chr17	80202348	80202397	TTGCAGAGAATCAGACTCCTTTTCCAGGGCCTCAGCTCCCTCCAGTGGTG
3370474	0.000698385	2.26777e-05	1.47238	up	SERTAD3	29946	Homo sapiens SERTA domain containing 3 (SERTAD3), transcript variant 1, mRNA.	GO:0006355|GO:0030308|GO:0045941	GO:0005634	GO:0005515|GO:0016563	chr19	45638841	45638890	AAAGAAAGCTGGGCCTGTCGAAGGATGACAGGGATGTGCTGCCAGGTTGC
6580202	0.0375347	0.00464821	1.24774	down	C19orf43	79002	Homo sapiens chromosome 19 open reading frame 43 (C19orf43), mRNA.				chr19	12841664	12841713	CAGCGGCAGCGGCGACAGCCTTCCCTGAGAGGACTTAAAAGCAGAAGGAA
4390347	0.00502834	0.000307912	1.35879	up	NBR1	4077	Homo sapiens neighbor of BRCA1 gene 1 (NBR1), transcript variant 1, mRNA.			GO:0008270|GO:0008270|GO:0046872	chr17	38576772	38576821	GGATAGCGGCAGAGCCGGTAGCGGACGGTCCTTGCATTGGCCTCCGGCAG
4260309	0.0492452	0.00682997	1.21363	up	MAST4	375449	Homo sapiens microtubule associated serine/threonine kinase family member 4 (MAST4), transcript variant 2, mRNA.	GO:0006468	GO:0005737	GO:0000166|GO:0000287|GO:0004674|GO:0005515|GO:0005524|GO:0016740|GO:0016301	chr5	65928270	65928319	GGTCAAACGCCCTGTGTGTCCAAATGCTGGGAGAACATCACCCCTTGGAT
6510053	0.00651553	0.000433494	1.35993	down	APEX1	328	Homo sapiens APEX nuclease (multifunctional DNA repair enzyme) 1 (APEX1), transcript variant 3, mRNA.	GO:0006284|GO:0006366|GO:0051101	GO:0005622|GO:0005634|GO:0005654|GO:0005654|GO:0005654|GO:0005737|GO:0005783|GO:0005813|GO:0005840|GO:0048471	GO:0000287|GO:0003677|GO:0003713|GO:0003714|GO:0003906|GO:0004520|GO:0004523|GO:0004528|GO:0004844|GO:0005515|GO:0005515|GO:0008408|GO:0016491|GO:0016829	chr14	19995423	19995472	GTTACCTGCATTGTGTGACAGCAAGATCCGTTCCAAGGCCCTCGGCAGTG
580037	0.0452787	0.00603051	1.21139	down	INO80E	283899	Homo sapiens INO80 complex subunit E (INO80E), mRNA.				chr16	29924193	29924242	TTCAGCGATGCAGGTAGCGGGGACGATGCCTTGGATGGAGACGATGACCT
5910349	0.000133945	2.70332e-06	1.44495	down	SPC24	147841	Homo sapiens SPC24, NDC80 kinetochore complex component, homolog (S. cerevisiae) (SPC24), mRNA.	GO:0007049|GO:0007067|GO:0051301	GO:0000777|GO:0005634	GO:0005515	chr19	11117635	11117684	TAGAAGGCAGAGGCCGGCAGATCACTTGAGCCCAGGAGTTGGAGACCAGA
1440632	0.00838725	0.00061356	1.38189	up	IPO5	3843	Homo sapiens importin 5 (IPO5), mRNA.	GO:0000059|GO:0006607|GO:0006886|GO:0044419	GO:0005634|GO:0005643|GO:0005737	GO:0005095|GO:0005515|GO:0008536|GO:0008565	chr13	97473850	97473899	GCTGGGCACTATGCTAAGCACTTTGGGAGCAAGAACCTCCTACCTTCCAG
1990390	0.0151688	0.00133544	1.25711	down	RAB3IP	117177	Homo sapiens RAB3A interacting protein (rabin3) (RAB3IP), transcript variant beta 1, mRNA.	GO:0006893|GO:0015031|GO:0033365|GO:0042384	GO:0005634|GO:0005737|GO:0005813|GO:0005829|GO:0005932	GO:0005085|GO:0005515|GO:0005515|GO:0005515	chr12	68495484	68495533	GGAACTCTGATGCTCTGCGTGGGACCATGCCTGAACTCCCCGAATAACTG
4150484	3.50445e-05	4.77087e-07	1.55291	down	TRMT61A	115708	Homo sapiens tRNA methyltransferase 61 homolog A (S. cerevisiae) (TRMT61A), mRNA.				chr14	103071928	103071977	TCTGACAGCCTCAAGGAAGGAGCAGTGCCTGTGTCAGCCATGGGGCCCTT
2940528	0.00282925	0.000145524	1.39947	down	SIGMAR1	10280	Homo sapiens sigma non-opioid intracellular receptor 1 (SIGMAR1), transcript variant 1, mRNA.				chr9	34634915	34634964	CCCCATTCTTCCTTTGGGGGTATGATGTGGAAGCTGGTTTCAGCCCAGGA
510291	0.00953936	0.00072715	1.27154	up	DECR1	1666	Homo sapiens 2,4-dienoyl CoA reductase 1, mitochondrial (DECR1), nuclear gene encoding mitochondrial protein, mRNA.	GO:0055114	GO:0005739	GO:0005488|GO:0008670|GO:0016491	chr8	91063942	91064089	CAGGGGAATTCAACGACCTGAGAAAGGTCACCAAGGAGCAGTGGGACACC
5220204	0.00253299	0.000125858	1.32009	up	C19orf66	55337	Homo sapiens chromosome 19 open reading frame 66 (C19orf66), mRNA.				chr19	10064832	10064881	GAGAAGGAATCTGGACTCCCCATCCCCCCACCAGGATAAAAGTCCTGACC
630333	0.000729422	2.38401e-05	1.3627	down	CKAP5	9793	Homo sapiens cytoskeleton associated protein 5 (CKAP5), transcript variant 1, mRNA.	GO:0030951|GO:0050658|GO:0051297|GO:0051300	GO:0000930|GO:0005813|GO:0015630	GO:0005488|GO:0005515|GO:0005515	chr11	46775938	46775987	ACTCTGCTTCTCTCTGTCAGCGTCCTGCTGCTCTAGAAGACTGTCCGTGG
6480209	0.0141389	0.00121706	1.29073	down	RRAGD	58528	Homo sapiens Ras-related GTP binding D (RRAGD), mRNA.		GO:0005634|GO:0005737	GO:0000166|GO:0005515|GO:0005525	chr6	90134496	90134545	TGCAGAAGAAAAAGAGAGCCACCCCTAATGGGACCCCTAGAGTGCTGCTG
730577	0.0230674	0.00238397	1.25548	down	CPXM1	56265	Homo sapiens carboxypeptidase X (M14 family), member 1 (CPXM1), mRNA.	GO:0006508|GO:0007155	GO:0005576|GO:0005615	GO:0004181|GO:0008233|GO:0008237|GO:0008270|GO:0046872	chr20	2774820	2774869	GGCGCCTGGAGCGGCTAAGGGGACAGAAGGATTGATACCTGCGGTTTAAG
1170095	0.0195668	0.00189781	1.26454	up	UQCC	55245	Homo sapiens ubiquinol-cytochrome c reductase complex chaperone (UQCC), nuclear gene encoding mitochondrial protein, transcript variant 1, mRNA.		GO:0031410		chr20	33961998	33962047	TGCGGCCCTGCGCATGTATACTAGCTGTGTGGAGAAAACTGACTTCGAGG
6650639	0.0279477	0.00311494	1.22805	up	VAMP1	6843	Homo sapiens vesicle-associated membrane protein 1 (synaptobrevin 1) (VAMP1), transcript variant 2, mRNA.	GO:0016192	GO:0005739|GO:0005741|GO:0005887|GO:0016020|GO:0019717|GO:0030054|GO:0030659|GO:0031410|GO:0045202	GO:0005515	chr12	6571556	6571605	CATCCCGTTCTTCGGTTTGCCATGAGACGATGTGGGGTTTCCACTGTGTG
7650431	0.00864332	0.000640076	1.33352	up	SLC39A6	25800	Homo sapiens solute carrier family 39 (zinc transporter), member 6 (SLC39A6), transcript variant 1, mRNA.	GO:0006811|GO:0006829|GO:0030001	GO:0005783|GO:0005886|GO:0016021	GO:0008270|GO:0046873	chr18	33691160	33691209	GACTTTGCTGTTCTACTAAAGGCTGGCATGACCGTTAAGCAGGCTGTCCT
2900348	3.01479e-05	3.92859e-07	1.67937	up	ZFP36	7538	Homo sapiens zinc finger protein 36, C3H type, homolog (mouse) (ZFP36), mRNA.	GO:0000289|GO:0006402|GO:0006402|GO:0007243|GO:0043488|GO:0045638|GO:0050728|GO:0050779	GO:0005634|GO:0005737|GO:0005829	GO:0003677|GO:0003727|GO:0003729|GO:0005515|GO:0005515|GO:0008270|GO:0017091|GO:0046872	chr19	39899714	39899763	CCAGTGTCTCCTGGTAACTGGAACCTCTCCTGAGGGGGAATCCTGGTGCT
6940521	0.00611602	0.000398491	1.43166	up	MRPL43	84545	Homo sapiens mitochondrial ribosomal protein L43 (MRPL43), nuclear gene encoding mitochondrial protein, transcript variant 1, mRNA.	GO:0006412	GO:0005739|GO:0005761|GO:0005840|GO:0005762|GO:0005840	GO:0003735|GO:0005515|GO:0045182	chr10	102746688	102746851	AATACCTTAACGGGGCTGTGCGCGAGGAGAGCATCCACTGCAAGTCGGTC
5700056	0.0392017	0.00493188	1.21189	up	HSD17B8	7923	Homo sapiens hydroxysteroid (17-beta) dehydrogenase 8 (HSD17B8), mRNA.	GO:0006703|GO:0055114	GO:0005575	GO:0004303|GO:0005488|GO:0016491|GO:0050327	chr6	33173926	33174173	CCGATGGGACACTTGGGGGACCCTGAGGATGTGGCAGATGTGGTCGCATT
670551	0.00903599	0.000679207	1.30917	up	FAM10A7	155019	Homo sapiens family with sequence similarity 10, member A7 (pseudogene) (FAM10A7), non-coding RNA.				chr7	132504135	132504184	AACTGGGACCACCCATATTTCAGTAGGACCTGGGTAGGGATTGGAAGTAC
1010538	2.61408e-07	9.03651e-10	1.87489	down	C9orf140	89958	Homo sapiens chromosome 9 open reading frame 140 (C9orf140), mRNA.			GO:0005509	chr9	139956919	139956968	GGCAGAAGTGTCCCCAGTTGAGAATCTGCCCCAGAGGAACACACCCACAC
5050670	0.0128275	0.00107542	1.27926	down	NUP160	23279	Homo sapiens nucleoporin 160kDa (NUP160), mRNA.	GO:0006406|GO:0015031|GO:0065002	GO:0005634|GO:0005635|GO:0005643|GO:0005643	GO:0005487|GO:0005515|GO:0005515	chr11	47813491	47813540	TAGCTGAGGGTTGTTGGCTTGTTGTAGCTGACCACCAAAAGCAGTCACTG
2470484	0.0359074	0.004385	1.22111	up	RNASEK	440400	Homo sapiens ribonuclease, RNase K (RNASEK), mRNA.	GO:0009303	GO:0005575|GO:0016020|GO:0016021	GO:0004521|GO:0016787	chr17	6858284	6858333	CTGCCAAGTTCGGCTCAATAAGCGCAAGGAATACATGGTGCGCTAGGGCC
4860494	0.00025586	6.04314e-06	1.57283	up	C3	718	Homo sapiens complement component 3 (C3), mRNA.	GO:0001798|GO:0006954|GO:0006957|GO:0006957|GO:0006958|GO:0007165|GO:0007186|GO:0050766	GO:0005576|GO:0005576|GO:0005576|GO:0005576|GO:0005576|GO:0005576	GO:0004866|GO:0005102	chr19	6636154	6637180	GGCTCAATGAACAGAGATACTACGGTGGTGGCTATGGCTCTACCCAGGCC
650689	3.35271e-08	5.68316e-11	1.97712	up	CLIP3	25999	Homo sapiens CAP-GLY domain containing linker protein 3 (CLIP3), mRNA.		GO:0005737|GO:0005794		chr19	41197432	41197481	CAGCTCACGACTGCCCCTTCACTGCATGTCCCCAAACTCAGCATGACTCC
2030243	0.0141165	0.00121439	1.26426	down	FTSJ2	29960	Homo sapiens FtsJ homolog 2 (E. coli) (FTSJ2), mRNA.	GO:0006364	GO:0005634	GO:0008173|GO:0016740	chr7	2274212	2274261	AACCCAGGGCTTTAGAAGGCTGAGGCTGGGGGATTGCTTGAAGTCAGGAG
5290673	0.0169795	0.00156643	1.28649	down	HSPA13	6782	Homo sapiens heat shock protein 70kDa family, member 13 (HSPA13), mRNA.		GO:0005783|GO:0005792	GO:0000166|GO:0005524	chr21	15743559	15743608	GTTTTGGTACTGTGTTTTCACTCAAACCACTGACTTAACAGATACTGCTG
4060546	0.000596509	1.84665e-05	1.7122	up	PHYH	5264	Homo sapiens phytanoyl-CoA 2-hydroxylase (PHYH), transcript variant 1, mRNA.	GO:0006629|GO:0007399|GO:0007601|GO:0007605|GO:0050896|GO:0055114|GO:0001561	GO:0005777	GO:0005506|GO:0005515|GO:0009055|GO:0031418|GO:0048244|GO:0003824|GO:0005515	chr10	13380213	13381984	GCCGGGGCTGTCGTAGCTCATCCCACTTCAGGGACTATTTCCTCTGCCAG
7550167	0.00124491	4.90631e-05	1.37698	down	SV2A	9900	Homo sapiens synaptic vesicle glycoprotein 2A (SV2A), mRNA.	GO:0006836|GO:0006874	GO:0005737|GO:0005783|GO:0008021|GO:0016020|GO:0016021|GO:0030054|GO:0031410|GO:0045202	GO:0005215	chr1	148141936	148141985	GGTTAGGCTGCCCCATCCCACCCTACTCTGTGTGGCTGCTTTCTTTGGTG
1170326	0.00828133	0.000602303	1.28066	down	POLE2	5427	Homo sapiens polymerase (DNA directed), epsilon 2 (p59 subunit) (POLE2), mRNA.	GO:0006260|GO:0006281|GO:0006297	GO:0005634|GO:0005654|GO:0005654	GO:0003677|GO:0003887|GO:0016740|GO:0016779	chr14	50117090	50117139	CCCAAGGACATCTGACTCCCCTACCTCTTTATGTCTGCCCAGTGTATTGG
6770253	0.000941166	3.40012e-05	1.38282	down	KIAA0101	9768	Homo sapiens KIAA0101 (KIAA0101), transcript variant 2, mRNA.				chr15	64657577	64657626	TACTAGGATAGAATCATGGTGGGCACAGTGGCTTCTCAGGAGGCTGAGGA
940291	0.0173333	0.00161208	1.26686	up	MIDN	90007	Homo sapiens midnolin (MIDN), mRNA.	GO:0006464	GO:0005634|GO:0005730		chr19	1209957	1210006	GAACCGGCTCGCCACCCTCTGCCCGGTAAGGGCTGCCCAAGAAAGCATTA
2600746	0.0282574	0.00316882	1.3157	down	VAT1	10493	Homo sapiens vesicle amine transport protein 1 homolog (T. californica) (VAT1), mRNA.	GO:0055114	GO:0016021	GO:0005488|GO:0008270|GO:0016491	chr17	41166823	41166872	AGGACCTGGGCCATTGCAACCAAAATGGGGACTTCCTGGGTAGGGAGGTC
6760192	0.0376192	0.00466703	1.22714	up	CHP	11261	Homo sapiens calcium binding protein P22 (CHP), mRNA.	GO:0006813|GO:0007264	GO:0005737|GO:0043231	GO:0005509|GO:0015459	chr15	39361044	39361093	TACCACTGCAAAGTGATGGAAAAGGGTGGAGAACAGGGGAGTAGCCAGGC
4390619	0.0168867	0.00155237	1.26076	up	RHOC	389	Homo sapiens ras homolog gene family, member C (RHOC), transcript variant 2, mRNA.	GO:0006096|GO:0007264|GO:0044262|GO:0007264|GO:0007264|GO:0007264|GO:0007264|GO:0043123	GO:0005622|GO:0016020|GO:0005622|GO:0005622|GO:0005622|GO:0005622|GO:0005886	GO:0000166|GO:0005525|GO:0016616|GO:0000166|GO:0005525|GO:0000166|GO:0005525|GO:0000166|GO:0005525|GO:0000166|GO:0003924|GO:0004871|GO:0005515|GO:0005515|GO:0005525	chr1	113243778	113243827	GGAGTTGTTTTCGGCAGGGGCCTTGTCTCTCACTGCATTTGGTCAGGGGG
4890706	6.94805e-06	5.74158e-08	1.80879	down	DR1	1810	Homo sapiens down-regulator of transcription 1, TBP-binding (negative cofactor 2) (DR1), mRNA.	GO:0000122|GO:0006350|GO:0006355	GO:0005622|GO:0005634	GO:0003714|GO:0008134|GO:0043565	chr1	93600166	93600215	ACTTATGTATTCACCAAGCCCAAAAATAGATTGTGGCTCCCAGGATTCCA
3370048	0.00974333	0.000748892	1.32627	down	SURF4	6836	Homo sapiens surfeit 4 (SURF4), mRNA.	GO:0008150	GO:0005783|GO:0005789|GO:0005793|GO:0016020|GO:0016021	GO:0003674	chr9	136228734	136228783	TCAACCTCACCAGGGCTGTCTCTTGGTCCACACCTCGCTCCCTGTTAGTG
6900025	0.000775344	2.54642e-05	1.38688	down	POLR2D	5433	Homo sapiens polymerase (RNA) II (DNA directed) polypeptide D (POLR2D), mRNA.	GO:0000398|GO:0006350|GO:0006367|GO:0006368|GO:0044237	GO:0005634|GO:0005654|GO:0005654|GO:0005654|GO:0005654|GO:0005654|GO:0005654|GO:0005654|GO:0005665	GO:0000166|GO:0003824|GO:0003899	chr2	128321052	128321101	GCCAAAGAGGTCCACAACCAGGTGTGCACTGTTCACTGCAGCCCATTTGC
4480722	0.0440492	0.00578907	1.23416	down	ARL13B	200894	Homo sapiens ADP-ribosylation factor-like 13B (ARL13B), transcript variant 2, mRNA.	GO:0007368|GO:0009953		GO:0000166|GO:0005525	chr3	93773585	93773634	CTTGGAGTTTGTACATGGGACTTAGCAACCACACTGAGTGAGGTAAAAGC
6860544	6.02291e-05	9.57132e-07	1.51371	down	FOXK1	221937	Homo sapiens forkhead box K1 (FOXK1), mRNA.	GO:0006350|GO:0006357|GO:0007275|GO:0007519|GO:0030154|GO:0045892|GO:0045893	GO:0005634	GO:0003700|GO:0005515|GO:0016563|GO:0016564|GO:0043565	chr7	4776604	4776653	GGATGTGAAGTTCTGGTCATGTCACCTTGCGTGTCTCACCCTGGAGGAGT
1230017	0.0266467	0.00292185	1.25099	down	PHCA	55331	Homo sapiens phytoceramidase, alkaline (PHCA), mRNA.	GO:0006672	GO:0000139|GO:0005783|GO:0005789|GO:0005794|GO:0016020|GO:0016021	GO:0016787|GO:0016811	chr11	76411321	76411370	GGATTCTAGGTGGACATTACAGAGTTGAATTCCTCACTACCCCCTCCCGC
5670594	0.0441357	0.00580978	1.21028	up	NMB	4828	Homo sapiens neuromedin B (NMB), transcript variant 1, mRNA.	GO:0007165|GO:0007218|GO:0007267	GO:0005576|GO:0005625	GO:0005179	chr15	85200433	85200482	GTCATGATCTGCTCGGAATCCTCCTGCTAAAGAAGGCTCTGGGCGTGAGC
520528	0.000302762	7.50394e-06	1.41662	down	CCDC99	54908	Homo sapiens coiled-coil domain containing 99 (CCDC99), mRNA.							GCTTGACTCTAACCTGGAGAGCTTCTTAAGTGATGCCCCTTCATGGAGCT
7200037	0.0157501	0.00141332	1.25196	down	SFRS4	6429	Homo sapiens splicing factor, arginine/serine-rich 4 (SFRS4), mRNA.	GO:0000398|GO:0008380	GO:0005634|GO:0016607	GO:0000166|GO:0003723|GO:0031202	chr1	29347189	29347238	TGGCCTTTCCTACAGGGAGCTCAGTAACCTGGACGGCTCTAAGGCTGGAA
4610341	0.000203143	4.48616e-06	1.43933	up	TMEM45A	55076	Homo sapiens transmembrane protein 45A (TMEM45A), mRNA.		GO:0016020|GO:0016021		chr3	100277415	100287696	GGGGAGCTGGTTCTTTCAGATTGGATTTGTCCTGTATCCCCCCAGTGGAG
4730196	5.7402e-06	4.56103e-08	1.69663	down	TK1	7083	Homo sapiens thymidine kinase 1, soluble (TK1), mRNA.	GO:0006139|GO:0006260	GO:0005737|GO:0005829	GO:0000166|GO:0004797|GO:0005524|GO:0016301|GO:0016740|GO:0019206				TGACATCAGCCTGCTTCTTCCCCTCTGCGGCTTTCACTGCTGAGTTTCTG
2650564	0.010519	0.000835258	1.26742	up	RARRES3	5920	Homo sapiens retinoic acid receptor responder (tazarotene induced) 3 (RARRES3), mRNA.	GO:0008285			chr11	63070226	63070275	GGCCACGGCGCTTGGAATCCTGGTTGTTGCTGGATGCTCTTTTGCGATTA
3370093	0.0377255	0.00468821	1.22434	up	ZDHHC1	29800	Homo sapiens zinc finger, DHHC-type containing 1 (ZDHHC1), mRNA.	GO:0008150|GO:0018345	GO:0005575|GO:0016020|GO:0016021	GO:0003677|GO:0005515|GO:0008270|GO:0016409|GO:0016740|GO:0046872	chr16	65985852	65985901	CCCACGACTCAGCAATACCCGCCCCACCGGCTGTGATGCTCCAATAAACT
6200309	0.0144414	0.00125032	1.25731	down	DNALI1	7802	Homo sapiens dynein, axonemal, light intermediate chain 1 (DNALI1), mRNA.	GO:0006928|GO:0007338	GO:0005858|GO:0005930	GO:0003777	chr1	37804885	37804934	AGGTTGAGGAGGCTTTATTTCCCTAGCACTGGTGAAGGGCTTCAACTGTC
1430463	0.000835013	2.84629e-05	1.74802	up	MICAL2	9645	Homo sapiens microtubule associated monoxygenase, calponin and LIM domain containing 2 (MICAL2), mRNA.	GO:0006725|GO:0008152	GO:0005737|GO:0005856	GO:0004497|GO:0008270|GO:0046872	chr11	12222218	12225828	GAAGGCAGCCCCCCAGTTCATTTCAGCCTTCCAGTGCTACACCCACTTCT
3360086	0.000101043	1.91023e-06	1.51923	down	NCOA6	23054	Homo sapiens nuclear receptor coactivator 6 (NCOA6), mRNA.	GO:0001701|GO:0006260|GO:0006281|GO:0006310|GO:0006350|GO:0006355|GO:0006367|GO:0007420|GO:0007507|GO:0009725|GO:0030099|GO:0030520|GO:0042921|GO:0045944	GO:0005634|GO:0005730|GO:0005634|GO:0005634|GO:0005667|GO:0005730	GO:0003682|GO:0005515|GO:0030331|GO:0030374|GO:0046965|GO:0046966	chr20	33302924	33302973	GCAATGGGGAAAGCAGGACTGTTGAGCCCTTTTGGTGTTGCGAGTTGAAG
2630288	0.0118926	0.000973935	1.2899	down	CSF3	1440	Homo sapiens colony stimulating factor 3 (granulocyte) (CSF3), transcript variant 1, mRNA.	GO:0006955|GO:0006955|GO:0006955|GO:0007275|GO:0008284|GO:0019221|GO:0030851	GO:0005576|GO:0005576|GO:0005737|GO:0005856|GO:0005576|GO:0005615|GO:0005737|GO:0005856	GO:0005125|GO:0008083|GO:0005125|GO:0005138|GO:0005125|GO:0005130|GO:0019899	chr17	35427100	35427149	AAACAGCAGTGTTCCCCATCTGGGTCCTTGCACCCCTCACTCTGGCCTCA
4150551	1.98529e-05	2.27154e-07	1.85458	down	CSF3	1440	Homo sapiens colony stimulating factor 3 (granulocyte) (CSF3), transcript variant 1, mRNA.	GO:0006955|GO:0006955|GO:0006955|GO:0007275|GO:0008284|GO:0019221|GO:0030851	GO:0005576|GO:0005576|GO:0005737|GO:0005856|GO:0005576|GO:0005615|GO:0005737|GO:0005856	GO:0005125|GO:0008083|GO:0005125|GO:0005138|GO:0005125|GO:0005130|GO:0019899	chr17	35427179	35427228	TTGGCTGTGAGGCCCCTGGACAAGCAGAGGTGGCCAGAGCTGGGAGGCAT
5290270	0.0379812	0.00472602	1.22077	up	S100A4	6275	Homo sapiens S100 calcium binding protein A4 (S100A4), transcript variant 2, mRNA.	GO:0001837	GO:0005634|GO:0005730|GO:0005737	GO:0005509|GO:0005515|GO:0005515	chr1	153517235	153517284	ATCCTGACTGCTGTCATGGCGTGCCCTCTGGAGAAGGCCCTGGATGTGAT
4570224	0.0166671	0.0015226	1.28413	down	C17orf53	78995	Homo sapiens chromosome 17 open reading frame 53 (C17orf53), mRNA.				chr17	39595293	39595342	TCCATGCCCAAGGTTCCCAGGTGCAGGACAGAGGTGTGGCCTATTGTACC
4180088	0.0283792	0.0031915	1.31095	up	ABL1	25	Homo sapiens c-abl oncogene 1, receptor tyrosine kinase (ABL1), transcript variant a, mRNA.	GO:0000115|GO:0006298|GO:0006355|GO:0006464|GO:0007155|GO:0008630|GO:0018108|GO:0030036|GO:0051353	GO:0005634|GO:0005730|GO:0005737|GO:0005856	GO:0000166|GO:0000287|GO:0003677|GO:0004715|GO:0005524|GO:0008022|GO:0016740|GO:0030145|GO:0004872|GO:0016301	chr9	132752752	132752801	CCTGTGGTGGCTCCCCCTCTGCTTCTCGGGGTCCAGTGCATTTTGTTTCT
4150458	0.0264236	0.00288305	1.26502	down	RPA3	6119	Homo sapiens replication protein A3, 14kDa (RPA3), mRNA.	GO:0000718|GO:0006260|GO:0006260|GO:0006297	GO:0005634|GO:0005654|GO:0005654|GO:0005654|GO:0005654|GO:0005662|GO:0005737	GO:0003697	chr7	7680227	7680276	TCTCTGGAATTGTGGAAGTGGTTGGAAGAGTAACCGCCAAGGCCACCATC
5290500	0.00737187	0.000514425	1.30118	up	CAPNS1	826	Homo sapiens calpain, small subunit 1 (CAPNS1), transcript variant 2, mRNA.	GO:0008284	GO:0005634|GO:0005737|GO:0005886	GO:0004198|GO:0005509|GO:0005515	chr19	36641017	36641066	TCCCCTGTACCTGTGCCAAGCCTAGCACTTGTGATGCCTCCATGCCCCGA
770746	0.01184	0.000967391	1.25965	up	ETV5	2119	Homo sapiens ets variant gene 5 (ets-related molecule) (ETV5), mRNA.	GO:0006355	GO:0005634	GO:0003700|GO:0043565	chr3	187247011	187247060	GGGCATAGGACAGCGGCATCACGGTTGCATTCCCATTGGACTCATGCACC
4060364	0.0230562	0.00238036	1.26212	down	MGAT4B	11282	Homo sapiens mannosyl (alpha-1,3-)-glycoprotein beta-1,4-N-acetylglucosaminyltransferase, isozyme B (MGAT4B), transcript variant 2, mRNA.	GO:0005975|GO:0006491|GO:0005975	GO:0000139|GO:0005794|GO:0016020|GO:0016021|GO:0016020	GO:0008454|GO:0016758|GO:0046872|GO:0016758	chr5	179157582	179157631	TACCCTGTGGCCAGCCCTGAAGCCCACATTTCTGGGGGTGTCGTCACTGC
6290494	6.42241e-05	1.06484e-06	1.62424	down	MCM3	4172	Homo sapiens minichromosome maintenance complex component 3 (MCM3), mRNA.	GO:0006260|GO:0006260|GO:0006270|GO:0006350|GO:0006355|GO:0007049	GO:0005634|GO:0005730|GO:0005634|GO:0005654|GO:0005654|GO:0005654|GO:0005654|GO:0005654|GO:0005654|GO:0005654|GO:0005658|GO:0005730|GO:0005737	GO:0000166|GO:0003677|GO:0005524|GO:0000166|GO:0003677|GO:0005515|GO:0005515|GO:0005515|GO:0005515|GO:0005515|GO:0005515|GO:0005515|GO:0005524|GO:0017111	chr6	52237345	52237394	CAGGATGACAATCAGGTCATGGTGTCTGAGGGCATCATCTTCCTCATCTG
5810634	0.000930503	3.34681e-05	1.36876	down	TDO2	6999	Homo sapiens tryptophan 2,3-dioxygenase (TDO2), mRNA.	GO:0019441|GO:0019674|GO:0055114	GO:0005829	GO:0004833|GO:0004833|GO:0005506|GO:0016491|GO:0046872	chr4	157060480	157060529	CATACCTGATTCCCCGACACTGGATACCGAAGATGAACCCAACCATTCAC
3180678	0.000616367	1.92961e-05	1.47511	up	HNRNPH2	3188	Homo sapiens heterogeneous nuclear ribonucleoprotein H2 (H') (HNRNPH2), transcript variant 1, mRNA.	GO:0000398	GO:0005634|GO:0005856|GO:0030530	GO:0000166|GO:0003723	chrX	100554823	100554872	GGGAGGGATGGGCTTATCCAACCAGTCTAGTTATGGAGGTCCTGCTAGCC
5220240	2.70986e-05	3.43283e-07	1.5076	up	FTH1	2495	Homo sapiens ferritin, heavy polypeptide 1 (FTH1), mRNA.	GO:0006826|GO:0006880|GO:0006955|GO:0008285|GO:0055114	GO:0008043	GO:0004322|GO:0005515|GO:0008199|GO:0016491	chr11	61731980	61732029	GTCTTTGAGGTCTTGGGATGAATCAGAAATCTATCCAGGCTATCTTCCAG
3800730	0.000541131	1.63962e-05	1.41743	down	GNA13	10672	Homo sapiens guanine nucleotide binding protein (G protein), alpha 13 (GNA13), mRNA.	GO:0001569|GO:0001701|GO:0006928|GO:0007165|GO:0007186|GO:0007243|GO:0007266|GO:0008360|GO:0030154|GO:0030168|GO:0030334	GO:0016020|GO:0042470	GO:0000166|GO:0003924|GO:0004871|GO:0005515|GO:0005525|GO:0019001	chr17	60437806	60437855	GAGAAGGTCCTCTGGTTAGTCTCTCAAATTGAGGCTGTTTAGGGAAATCC
6650161	0.000450632	1.28425e-05	1.45911	down	GNA13	10672	Homo sapiens guanine nucleotide binding protein (G protein), alpha 13 (GNA13), mRNA.	GO:0001569|GO:0001701|GO:0006928|GO:0007165|GO:0007186|GO:0007243|GO:0007266|GO:0008360|GO:0030154|GO:0030168|GO:0030334	GO:0016020|GO:0042470	GO:0000166|GO:0003924|GO:0004871|GO:0005515|GO:0005525|GO:0019001	chr17	60437411	60437460	CCCCAAACTAAGCCATTTGAAACAAGATTCTCTCCATTGCAGTTTGTAGC
5670241	0.00066055	2.10993e-05	1.43451	down	STAU1	6780	Homo sapiens staufen, RNA binding protein, homolog 1 (Drosophila) (STAU1), transcript variant T4, mRNA.	GO:0008298	GO:0005622|GO:0005791|GO:0005875|GO:0030529|GO:0005622|GO:0005622|GO:0005622|GO:0005622	GO:0003725|GO:0005515|GO:0005515|GO:0005515|GO:0003725|GO:0003725|GO:0003725|GO:0003725	chr20	47730600	47730649	AACCCAGGACAGTTTCAGTGATGCAAATTGTGTGCCCTCTGGTTCAGCTG
5810253	0.0011508	4.40741e-05	1.34841	down	POLA1	5422	Homo sapiens polymerase (DNA directed), alpha 1, catalytic subunit (POLA1), mRNA.	GO:0006139|GO:0006260|GO:0000084|GO:0000731|GO:0000731|GO:0000731|GO:0006139|GO:0006270|GO:0006272|GO:0006272|GO:0006273|GO:0006273|GO:0006303|GO:0008283	GO:0005634|GO:0005730|GO:0005737|GO:0000785|GO:0005634|GO:0005634|GO:0005635|GO:0005654|GO:0005654|GO:0005654|GO:0005654|GO:0005658|GO:0005658|GO:0005730|GO:0005737|GO:0016363	GO:0000166|GO:0003677|GO:0003887|GO:0016740|GO:0016779|GO:0000166|GO:0003677|GO:0003677|GO:0003682|GO:0003887|GO:0003887|GO:0003887|GO:0003896|GO:0005515|GO:0005515|GO:0005515|GO:0005515|GO:0005515|GO:0005515|GO:0005515|GO:0005515|GO:0005515|GO:0008270|GO:0016740|GO:0016779|GO:0046872|GO:0046982	chrX	24749535	24749584	GTGTTGTATTCAGAAAAACGGGGAGAGGGATGCTTAATTGGCCCTGGCGC
150148	0.00213757	0.000101681	1.43112	down	MAP1S	55201	Homo sapiens microtubule-associated protein 1S (MAP1S), mRNA.	GO:0001578|GO:0006915|GO:0007399|GO:0007420|GO:0047497|GO:0048812	GO:0005634|GO:0005737|GO:0005829|GO:0005856|GO:0005874|GO:0030425|GO:0042995|GO:0043025|GO:0045202|GO:0048471	GO:0003677|GO:0004536|GO:0008017|GO:0008017|GO:0042802|GO:0048487|GO:0051015|GO:0051015	chr19	17705235	17706128	CAGGTGACCCTGATCCCCACTTTCGACTCGGTGGCCATGCATACGTGGTA
7200403	0.00161478	6.90289e-05	1.89022	up	SPG21	51324	Homo sapiens spastic paraplegia 21 (autosomal recessive, Mast syndrome) (SPG21), transcript variant 1, mRNA. XM_945612 XM_945613 XM_945615 XM_945617 XM_945619 XM_945622	GO:0050851	GO:0005737|GO:0005768|GO:0005794|GO:0005829|GO:0005829|GO:0010008|GO:0016020|GO:0030140|GO:0030140	GO:0042609|GO:0042609	chr15	65273262	65273311	CCCCGAAGTATCAGGTGTCCTCTCATATTCCTGCCCCCTGTCAGTGGAAC
110307	0.0103473	0.000812887	1.25884	up	FILIP1L	11259	Homo sapiens filamin A interacting protein 1-like (FILIP1L), transcript variant 2, mRNA.	GO:0008150	GO:0016459	GO:0003674	chr3	101049761	101049810	CTGACCACGCTCACCCTCATCCAGTCCATACTGATATTTTTGCAAGGAAC
1170528	0.0193336	0.00186597	1.25609	down	FANCB	2187	Homo sapiens Fanconi anemia, complementation group B (FANCB), transcript variant 1, mRNA.	GO:0006281	GO:0005634		chrX	14887066	14887115	CTGATGAAGCTGAAACTACTTTGTGATGCCTATTGTCCCAGATCTTTCTG
5570196	0.0453109	0.0060413	1.2278	up	ACTR2	10097	Homo sapiens ARP2 actin-related protein 2 homolog (yeast) (ACTR2), transcript variant 1, mRNA.	GO:0006928	GO:0005737|GO:0005885|GO:0042995	GO:0000166|GO:0003779|GO:0005515|GO:0005524	chr2	65351207	65351256	GCAGTTGGGTTCAGGGAAATGGGATTGACTTGGCCTTCAGGCTCCTTTGG
1780736	0.038211	0.00476879	1.21313	up	RHBDD1	84236	Homo sapiens rhomboid domain containing 1 (RHBDD1), mRNA.		GO:0016020|GO:0016021	GO:0004252|GO:0008233	chr2	227569371	227569420	GCCAAATGTCCAAAACACGCCCTTGGGCCCCGCCACGTTACAATCCACAG
6620379	0.00279592	0.00014296	1.35072	down	LRRC20	55222	Homo sapiens leucine rich repeat containing 20 (LRRC20), transcript variant 2, mRNA.				chr10	72058805	72058854	TCTGCTTGGAGAGTTTGCCCTTGTCTGTCTTGGAAAGTGTGGGCAGCCAC
7160328	0.0255436	0.0027603	1.23117	down	LRRC20	55222	Homo sapiens leucine rich repeat containing 20 (LRRC20), transcript variant 2, mRNA.				chr10	72059297	72059346	CCAGAGCCTTGCAACTCAAAGTGTGGTCTGTGGACCAGCAGCGGCAGTGA
4880537	0.000808426	2.70313e-05	1.35474	up	LIMA1	51474	Homo sapiens LIM domain and actin binding 1 (LIMA1), mRNA.	GO:0030835|GO:0031529|GO:0051017	GO:0001725|GO:0005737|GO:0005925|GO:0015629|GO:0030054	GO:0003785|GO:0008270|GO:0046872|GO:0051015	chr12	48856264	48856313	CCTTCGGGATCACTGTCCCCCATCTTCCGTGTTAGAGCAAAGTGAAGAGT
3890326	0.00513169	0.000316143	1.29663	up	SOD2	6648	Homo sapiens superoxide dismutase 2, mitochondrial (SOD2), nuclear gene encoding mitochondrial protein, transcript variant 2, mRNA.	GO:0000303|GO:0001315|GO:0001836|GO:0006302|GO:0006357|GO:0006801|GO:0006979|GO:0042542|GO:0043066|GO:0055114|GO:0000303|GO:0001315|GO:0001836|GO:0006302|GO:0006357|GO:0006801|GO:0006979|GO:0042542|GO:0043066|GO:0055114	GO:0005739|GO:0005743|GO:0005759|GO:0005739|GO:0005743	GO:0004784|GO:0016491|GO:0030145|GO:0046872|GO:0004784|GO:0016491|GO:0046872	chr6	160103621	160103670	GGCCTTATTCCACTGCTGGGGATTGATGTGTGGGAGCACGCTTACTACCT
770541	0.0360038	0.0044056	1.21273	up	EI24	9538	Homo sapiens etoposide induced 2.4 mRNA (EI24), transcript variant 2, mRNA.	GO:0006917	GO:0016020|GO:0016021		chr11	124959536	124959585	CACTAAACCTGAACTTTTCAACTCCGTTGGTGGTGGGAGGCAGCGGGCAG
6200369	0.00980109	0.000755335	1.31484	down	PPP1CB	5500	Homo sapiens protein phosphatase 1, catalytic subunit, beta isoform (PPP1CB), transcript variant 3, mRNA.	GO:0005975|GO:0005977|GO:0006470|GO:0007049|GO:0051301	GO:0005737	GO:0004721|GO:0005506|GO:0005515|GO:0005515|GO:0005515|GO:0005515|GO:0005515|GO:0005515|GO:0005515|GO:0016787|GO:0030145|GO:0046872	chr2	28878805	28878854	GCTGCCCCTGAGAAGAGACTTAATCCAAGCCTGATTGTACTAGTGGCATC
2060541	0.0254208	0.00274165	1.22547	up	LOC148413	148413	Homo sapiens hypothetical LOC148413 (LOC148413), non-coding RNA.				chr1	1337225	1337274	AGCCTTGGAAGCAGGGTGTGCTCCTCGGTGTGGTCGCTCGATACCAGAAA
730110	0.0243984	0.00259002	1.23421	down	METTL4	64863	Homo sapiens methyltransferase like 4 (METTL4), mRNA.	GO:0006139|GO:0032259	GO:0005634	GO:0003676|GO:0008168|GO:0016740	chr18	2544814	2544863	CTTTTGCAGTCAATCCCCTGCTCCTATCCTTGGCCCCTGGCAAACACTGG
6290747	0.0159962	0.00143879	1.24776	down	NRGN	4900	Homo sapiens neurogranin (protein kinase C substrate, RC3) (NRGN), mRNA.	GO:0007165|GO:0007399		GO:0005516	chr11	124121971	124122020	GATCCGGGGCGAGATGAAGGGAAGAGGGTTGTTTTGGTTTCGGACGACCC
770390	0.0227498	0.00232638	1.24053	down	PRKDC	5591	Homo sapiens protein kinase, DNA-activated, catalytic polypeptide (PRKDC), transcript variant 2, mRNA.	GO:0000723|GO:0001756|GO:0002328|GO:0006303|GO:0006310|GO:0006464|GO:0006915|GO:0007420|GO:0007507|GO:0010332|GO:0018105|GO:0033077|GO:0033152|GO:0033153	GO:0005634|GO:0005654|GO:0005654|GO:0005958	GO:0003677|GO:0004677|GO:0005515|GO:0005524|GO:0016740	chr8	48851959	48852008	CCCCCCGCCAGTCCTCCACACCCAAACTGTTTCTGATTGGCTTTTAGCTT
4040189	9.97248e-05	1.86476e-06	1.46531	up	RIMS3	9783	Homo sapiens regulating synaptic membrane exocytosis 3 (RIMS3), mRNA.	GO:0005975|GO:0006836|GO:0006887	GO:0030054|GO:0045202	GO:0004553	chr1	41086475	41086524	GTGCAGCATCTTTCCTAACTTGTTGTGGTTCCCGGGTGGCAGGTGCACAG
1710368	2.60193e-05	3.26654e-07	1.61454	down	EZH2	2146	Homo sapiens enhancer of zeste homolog 2 (Drosophila) (EZH2), transcript variant 2, mRNA.	GO:0006350|GO:0006355|GO:0016568	GO:0005634|GO:0005634|GO:0035098	GO:0003677|GO:0003677|GO:0005515|GO:0005515|GO:0005515|GO:0008168|GO:0016740|GO:0018024	chr7	148504718	148504767	CGGCATCGAAAGAGAAATGGAAATCCCTTGACATCTGCTACCTCCTCCCC
4920215	0.00837044	0.000611748	1.26999	down	C9orf64	84267	Homo sapiens chromosome 9 open reading frame 64 (C9orf64), mRNA.	GO:0008150	GO:0005575	GO:0003674	chr9	86553680	86553729	GCCACAGTCACGCCACTGCATTCTATCCTGGGCAACAGATGGAGACCTTG
160598	0.0372893	0.00460438	1.23491	down	HSPH1	10808	Homo sapiens heat shock 105kDa/110kDa protein 1 (HSPH1), mRNA.	GO:0006986|GO:0006950|GO:0051085|GO:0006950	GO:0005737	GO:0000166|GO:0005524|GO:0005515|GO:0005524|GO:0000166|GO:0005524	chr13	31711055	31711104	CCTGCCAAGGTAGTTTTCTTGCATTTTGCTCTCCATTCAGCATGTGTGTG
130326	0.00988868	0.00076373	1.51486	up	GAR1	54433	Homo sapiens GAR1 ribonucleoprotein homolog (yeast) (GAR1), transcript variant 1, mRNA.				chr4	110736763	110736812	GCGCTAAAGGCTGTTTTGGAACCAGTGTTGCTTGTTCCGCGGGTGATTGG
1010544	0.0257615	0.00279203	1.31106	down	GAR1	54433	Homo sapiens GAR1 ribonucleoprotein homolog (yeast) (GAR1), transcript variant 1, mRNA.				chr4	110745588	110745637	GTGAAACAGTTGACAGACATCACCAGTTGACTTCTGCATTAACCTGCATG
1410678	0.03162	0.0036866	1.27542	up	FAM21C	253725	Homo sapiens family with sequence similarity 21, member C (FAM21C), mRNA.				chr10	45601074	45602526	GAAACACCTCAGGCAAATTTAGCGATCAACCCAGCGGCCTTGCTGCCCAC
3610440	0.0233575	0.00242632	1.23804	up	MAF	4094	Homo sapiens v-maf musculoaponeurotic fibrosarcoma oncogene homolog (avian) (MAF), transcript variant 1, mRNA.	GO:0001816|GO:0006355|GO:0045944	GO:0000785|GO:0005634|GO:0005737	GO:0003700|GO:0003702|GO:0043565|GO:0046983	chr16	78185938	78190218	GCAGCGACAACCCGTCCTCTCCCGAGTTTTTCATAACTGAGCCCACTCGC
3130138	0.0416515	0.00535009	1.22894	down	BRPF1	7862	Homo sapiens bromodomain and PHD finger containing, 1 (BRPF1), transcript variant 1, mRNA.	GO:0006350|GO:0006355	GO:0005622|GO:0005622|GO:0005634	GO:0005515|GO:0008270|GO:0046872|GO:0003677|GO:0005515|GO:0008270|GO:0046872	chr3	9764352	9764401	CTACCTGCTCATGCCAGGAGAATCCATAACTGCCTAGAGGCCTGGGGCCC
6940484	0.0330977	0.00391148	1.24756	up	ASPSCR1	79058	Homo sapiens alveolar soft part sarcoma chromosome region, candidate 1 (ASPSCR1), mRNA.	GO:0008150	GO:0005575|GO:0012505|GO:0016020	GO:0003674	chr17	77568525	79935428	GGACCACCTCCTCTGCCAGCAGGAATAAAGACTTGTGCATCCCTCAAAAA
2680487	0.00624767	0.000409942	1.41127	down	SERINC1	57515	Homo sapiens serine incorporator 1 (SERINC1), mRNA.	GO:0006629|GO:0006658|GO:0006665|GO:0008654|GO:0015825|GO:0051347	GO:0005783|GO:0005789|GO:0005886|GO:0016021	GO:0005515|GO:0015194	chr6	122806526	122806575	GGATTGCTGGTGTCCAGCATGACCCATAAACAGGTCAGAAGAATGATGGA
7400711	0.00285233	0.000146862	1.35202	down	KIAA0664	23277	Homo sapiens KIAA0664 (KIAA0664), mRNA.	GO:0006412		GO:0003743|GO:0005488	chr17	2592990	2593039	GACGTGATGTCGCTTCTCTGGTGCCCAGCTCCCTTCCTGGTCTGAGACTA
520184	0.0122036	0.00100936	1.25556	up	HPCAL1	3241	Homo sapiens hippocalcin-like 1 (HPCAL1), transcript variant 2, mRNA.			GO:0005509	chr2	10484818	10484867	TGCATGTGTGCCCTGAGCCGTGATGATCCTCCCATCCGTGTTGTGAGCAC
270674	0.0146369	0.00127475	1.29797	up	HPCAL1	3241	Homo sapiens hippocalcin-like 1 (HPCAL1), transcript variant 2, mRNA.			GO:0005509	chr2	10444031	10454423	AGCGTTCTCAGGCTAGCCCTCCCTGCTGAAAAGAGAACCGTGTGGGACTC
1410427	0.0300327	0.00344108	1.27639	up	ZRANB1	54764	Homo sapiens zinc finger, RAN-binding domain containing 1 (ZRANB1), mRNA.		GO:0005622|GO:0005634|GO:0005737	GO:0005515|GO:0008270|GO:0046872	chr10	126645172	126645221	CCCCCTGGTCACTCAGATGGTAGAAAAATGGCTTGACCGCTACCGACAGA
2470035	1.38174e-05	1.39067e-07	1.5749	down	KIF18A	81930	Homo sapiens kinesin family member 18A (KIF18A), mRNA.	GO:0007018|GO:0015031	GO:0005634|GO:0005737|GO:0005874|GO:0005875|GO:0042995	GO:0000166|GO:0003777|GO:0005524	chr11	27999027	27999076	CCCTGAGTGTAAGTTACCATGGTGGCAGCTTAGTTTTACTATGCCACAAC
240333	0.0130197	0.00109829	1.34195	up	ETS1	2113	Homo sapiens v-ets erythroblastosis virus E26 oncogene homolog 1 (avian) (ETS1), mRNA.	GO:0006350|GO:0006355|GO:0006366|GO:0006917|GO:0006955|GO:0008285|GO:0045648|GO:0045786|GO:0045786|GO:0045941|GO:0046677	GO:0005634|GO:0005634|GO:0005634	GO:0003700|GO:0003700|GO:0003702|GO:0005515|GO:0008134|GO:0043565	chr11	127834393	127834442	CCATCTCTCTTCTAGTCATGCTGTGCATGCCGCTTACTCTGTTGGGGTCT
1940253	0.00940307	0.000713664	1.28023	down	CRY1	1407	Homo sapiens cryptochrome 1 (photolyase-like) (CRY1), mRNA.	GO:0006281|GO:0006350|GO:0006355|GO:0007623|GO:0018298|GO:0050896	GO:0005634|GO:0005737|GO:0005739	GO:0000166|GO:0003677|GO:0003913|GO:0005515|GO:0008020	chr12	105910740	105910789	TCCATGGGCACTGGTCTCAGTGGTGGGAAACGTCCTAGTCAGGAAGAGGA
6660201	0.00803062	0.000576836	1.28649	up	GCDH	2639	Homo sapiens glutaryl-Coenzyme A dehydrogenase (GCDH), nuclear gene encoding mitochondrial protein, transcript variant 1, mRNA.	GO:0055114	GO:0005739|GO:0005739|GO:0005743|GO:0005759|GO:0005739	GO:0004361|GO:0009055|GO:0050660	chr19	12871434	12871483	TGAGCTTAGAAAGGGAGGTGGCGGATGGAGTGGGAAGTGAGAGACACTGA
3290398	1.32703e-09	7.73244e-13	2.28809	down	SLC25A3	5250	Homo sapiens solute carrier family 25 (mitochondrial carrier; phosphate carrier), member 3 (SLC25A3), nuclear gene encoding mitochondrial protein, transcript variant 2, mRNA.	GO:0006091|GO:0006810|GO:0006810	GO:0005739|GO:0005739|GO:0005743|GO:0005743|GO:0005887|GO:0016020	GO:0005488|GO:0015293|GO:0015320	chr12	97519358	97519407	AGGTCTACTTCAGACTTCCTCGCCCTCCTCCACCCGAGATGCCAGAGTCT
4040224	7.51527e-09	7.16574e-12	2.19104	down	SLC25A3	5250	Homo sapiens solute carrier family 25 (mitochondrial carrier; phosphate carrier), member 3 (SLC25A3), nuclear gene encoding mitochondrial protein, transcript variant 2, mRNA.	GO:0006091|GO:0006810|GO:0006810	GO:0005739|GO:0005739|GO:0005743|GO:0005743|GO:0005887|GO:0016020	GO:0005488|GO:0015293|GO:0015320	chr12	97517964	97518013	GTGGTTCCTAAGCCCCGCAGTGAATGTTCAAAGCCAGAGCAGCTGGTTGT
870601	0.00395705	0.000227428	1.33515	down	TOPBP1	11073	Homo sapiens topoisomerase (DNA) II binding protein 1 (TOPBP1), mRNA.	GO:0006281|GO:0010212	GO:0000794|GO:0005622|GO:0005634|GO:0016605	GO:0003677|GO:0008022	chr3	134802302	134802351	ACCTCTTTTAACAGGAGCCTGAGCACAAGGTTTAATGAGGAAGCTGGGGC
70041	0.00203727	9.56217e-05	1.41433	down	UPF3A	65110	Homo sapiens UPF3 regulator of nonsense transcripts homolog A (yeast) (UPF3A), transcript variant 1, mRNA.	GO:0000184|GO:0006810|GO:0051028	GO:0005634|GO:0005737	GO:0000166|GO:0003723|GO:0005487|GO:0005515	chr13	114069879	114069928	GCCTAGAATATCCTGCAGTGGTAGAGTTTGCTCCATTCCAGAAGATAGCC
430025	0.0284744	0.00320371	1.23649	up	CSNK2A1	1457	Homo sapiens casein kinase 2, alpha 1 polypeptide (CSNK2A1), transcript variant 2, mRNA.	GO:0006468|GO:0006468|GO:0007165|GO:0016055	GO:0005634|GO:0005886	GO:0000166|GO:0004674|GO:0005524|GO:0016740|GO:0000166|GO:0004674|GO:0005524|GO:0016740|GO:0047485	chr20	464341	464390	TCCACCGTCCCACACTTTAGGGGGTTGGTATCTCGTGCTCTTCTCCAGAG
7400437	0.00851793	0.00062713	1.34606	up	CTTN	2017	Homo sapiens cortactin (CTTN), transcript variant 1, mRNA.		GO:0005737|GO:0005938|GO:0030027|GO:0001726|GO:0005625|GO:0005737|GO:0005856|GO:0005938|GO:0030027	GO:0005515|GO:0005515	chr11	69945233	69945282	CTGGTTTTGGAGGCAAATTCGGTGTTCAGTCGGAGAGGCAGGACTCCGCT
2850575	0.000888687	3.11638e-05	1.4267	down	RRM1	6240	Homo sapiens ribonucleotide reductase M1 polypeptide (RRM1), mRNA.	GO:0006260|GO:0055114	GO:0005737|GO:0005829|GO:0005971	GO:0000166|GO:0004748|GO:0005515|GO:0005524|GO:0016491	chr11	4116255	4116304	TAGTGGGTTTGCTTGAGGTGGTAAGGCTTTGCTGGACCCTGTTGCAGGCA
160142	0.00830158	0.000604655	1.36283	up	GPR89A	51463	Homo sapiens G protein-coupled receptor 89A (GPR89A), mRNA.	GO:0043123	GO:0016020|GO:0016021	GO:0004871	chr1	145867249	145867298	GCAGGAGCCTTCCTTACACTTCGCCATGAGTTTCCTGATCGACTCCAGCA
1260180	0.0345249	0.00414964	1.30553	down	EYA4	2070	Homo sapiens eyes absent homolog 4 (Drosophila) (EYA4), transcript variant 1, mRNA.	GO:0006350|GO:0006355|GO:0007275|GO:0007601|GO:0007605|GO:0008152|GO:0009653	GO:0005634|GO:0005737	GO:0000287|GO:0004725|GO:0016787	chr6	133891950	133891999	GCAGCAACACACATGCTCCGTCTGACAAGGTGGTCAACAACATTCCTCAA
3520372	7.68078e-05	1.30603e-06	1.61818	up	CES2	8824	Homo sapiens carboxylesterase 2 (intestine, liver) (CES2), transcript variant 1, mRNA.	GO:0009056	GO:0005783|GO:0005788	GO:0004091|GO:0016787	chr16	65536365	65536414	TCTCTCGTCTGAGCCCCCAGGCCTTTTCCACTTTGAGGGAGGTGCTTCGA
3420671	0.016051	0.00144883	1.27297	up	TRAPPC1	58485	Homo sapiens trafficking protein particle complex 1 (TRAPPC1), mRNA.	GO:0006888|GO:0016192	GO:0005783|GO:0005794|GO:0005801		chr17	7833740	7833789	TGATGCTCTCCTCCTACCAGAGTGAAGCCCACAGAGTCCCTCCACCTCCA
6560725	0.00157064	6.68245e-05	1.36595	down	C16orf59	80178	Homo sapiens chromosome 16 open reading frame 59 (C16orf59), mRNA.				chr16	2454788	2454837	AGGTGGCCTCACTGGCTCTTCTCAGGACAACTAAGCCTGCTGGTCAGGGC
5420343	0.0013277	5.32404e-05	1.40004	up	ATF6	22926	Homo sapiens activating transcription factor 6 (ATF6), mRNA.	GO:0006350|GO:0006357|GO:0006457|GO:0006986|GO:0006990|GO:0007165	GO:0005634|GO:0005635|GO:0005654|GO:0005783|GO:0005789|GO:0016020|GO:0016021	GO:0003700|GO:0003700|GO:0003702|GO:0003713|GO:0043565|GO:0046983	chr1	160195281	160195330	TGTTTCTTCAGTGGCAAATGTAGCCCTGCATCCTCCAGTGTTACCTGGTG
5900332	0.00791093	0.000566982	1.38613	down	CHMP1A	5119	Homo sapiens chromatin modifying protein 1A (CHMP1A), transcript variant 2, mRNA.	GO:0006350|GO:0007049|GO:0007076|GO:0015031|GO:0016192|GO:0016458|GO:0045014|GO:0045749|GO:0045892	GO:0000794|GO:0005634|GO:0005737|GO:0005769|GO:0005815|GO:0010008|GO:0012505|GO:0016020|GO:0016363	GO:0008237|GO:0008270|GO:0019904	chr16	89710962	89711011	AACGTCCTTCTGTCCATCGTGGGTAACAGCCTTGGGGAGGGTGCAGAGCT
3130228	0.0251939	0.00271584	1.2466	up	SIL1	64374	Homo sapiens SIL1 homolog, endoplasmic reticulum chaperone (S. cerevisiae) (SIL1), transcript variant 1, mRNA.	GO:0006457|GO:0065002	GO:0005783|GO:0005788	GO:0005488|GO:0051082	chr5	138378330	138378379	CTGTCAACAGCTTGCTGAAGGAGCTGAGATGAGGCCCCACACCAGGACTG
6560603	0.000158389	3.37284e-06	1.45336	up	SIL1	64374	Homo sapiens SIL1 homolog, endoplasmic reticulum chaperone (S. cerevisiae) (SIL1), transcript variant 1, mRNA.	GO:0006457|GO:0065002	GO:0005783|GO:0005788	GO:0005488|GO:0051082	chr5	138362612	138362661	GTGGGCTTCTCAGGCAGGAGGACATCTTGGCAGTGCTGGCTTGGCCATTA
5490707	0.0351297	0.00425398	1.20733	up	FBXO3	26273	Homo sapiens F-box protein 3 (FBXO3), transcript variant 2, mRNA.	GO:0006508|GO:0006511		GO:0004842	chr11	33768674	33768723	CCGATTCCATATGGCATGTCCAACATTCAGGGTGTCTATAGCCCGATTGG
580484	0.0260489	0.00283147	1.3695	up	HIP1	3092	Homo sapiens huntingtin interacting protein 1 (HIP1), mRNA.	GO:0006897|GO:0006897|GO:0006919|GO:0042981|GO:0048268	GO:0005624|GO:0005737|GO:0005794|GO:0005856|GO:0012505|GO:0016020	GO:0003779|GO:0005200|GO:0005543|GO:0030276	chr7	75163769	75163818	TGCAGCCGTCCATAGCAGTACCCCTAAAATCCCACCAGAATACGGGTCCC
6620528	0.00324134	0.000175165	1.32755	up	MT1X	4501	Homo sapiens metallothionein 1X (MT1X), mRNA.	GO:0010038		GO:0004872|GO:0046872|GO:0005507|GO:0008270|GO:0046870|GO:0046872	chr16	55273897	55273946	CTGTCCCGCTGCGTGTTTTCCTCTTGATCGGGAACTCCTGCTTCTCCTTG
1660309	0.00940307	0.000713772	1.68029	up	THOC4	10189	Homo sapiens THO complex 4 (THOC4), mRNA.	GO:0000398|GO:0006810|GO:0008380|GO:0051028	GO:0005634|GO:0005681|GO:0005737	GO:0000166|GO:0003723|GO:0005515	chr17	77442668	77442717	TGGACATGTCTCTGGACGACATCATTAAACTGAACCGGAGCCAGCGAGGC
460719	0.000666687	2.14012e-05	1.54784	up	IP6K2	51447	Homo sapiens inositol hexakisphosphate kinase 2 (IP6K2), transcript variant 2, mRNA.				chr3	48732585	48732634	ATGCGTGCTCCGCTTCAATGAGACAACCCTGTGCAAGCCCCTGGTCCCAA
1430278	0.00171619	7.60804e-05	1.33491	up	CTSK	1513	Homo sapiens cathepsin K (CTSK), mRNA.	GO:0006508|GO:0006508	GO:0005764	GO:0004197|GO:0004197|GO:0005515|GO:0008233	chr1	150768987	150769036	AGGCTAAGAGATGTGACTACAGCCTGCCCCTGACTGTGTTGTCCCAGGGC
2480341	0.035878	0.00437499	1.22169	down	CDC25A	993	Homo sapiens cell division cycle 25 homolog A (S. pombe) (CDC25A), transcript variant 1, mRNA.	GO:0000079|GO:0006260|GO:0006470|GO:0007049|GO:0007067|GO:0008283|GO:0051301	GO:0005575|GO:0005622|GO:0005634|GO:0005654|GO:0005654|GO:0005654|GO:0005794	GO:0004725|GO:0005515|GO:0016787	chr3	48199787	48199836	GGTGCCAGCCTCCTTACCATCACGGCTTCACTGAGGTGTAGGTGGGTTTT
2480241	0.016516	0.00150458	1.27352	down	ATP6V1C1	528	Homo sapiens ATPase, H+ transporting, lysosomal 42kDa, V1 subunit C1 (ATP6V1C1), mRNA.	GO:0006811|GO:0015992	GO:0016469|GO:0016469	GO:0005524|GO:0016820|GO:0005215|GO:0005515|GO:0005524|GO:0008553|GO:0016787|GO:0016820|GO:0046961	chr8	104085004	104085053	GAGTAAAGCCATGGAAGCCATGAACAGTAAGAGACTGCCGCCTGGCATGG
460193	0.00407719	0.000236709	1.70515	up	MAD2L1BP	9587	Homo sapiens MAD2L1 binding protein (MAD2L1BP), transcript variant 2, mRNA.	GO:0007096|GO:0007096|GO:0007096	GO:0005634|GO:0005634|GO:0005634|GO:0005737	GO:0005515|GO:0005515|GO:0005515	chr6	43603608	43603657	TCGTGATGGCGGCGCCGGAGGCGGAGGTTCTGTCCTCAGCCGCAGTCCCT
4900240	0.0316747	0.00369801	1.22065	up	FBXL20	84961	Homo sapiens F-box and leucine-rich repeat protein 20 (FBXL20), mRNA.	GO:0006511	GO:0005737	GO:0005515	chr17	37416959	37417008	CCCCCCACACTCTTGCTCAGTCTGTCACCTGTTCAGTCTGCTTACTCACT
4860500	0.0249966	0.00267513	1.22651	up	LOC652968	652968	Homo sapiens hypothetical protein LOC652968 (LOC652968), mRNA.				chr22	29011462	29011511	CTGTTCTGCTGGGGACCCTCGTTCCGCTCTCTGTATGTAAGCTGCGTGCA
630446	0.0283007	0.00317674	1.24569	down	C22orf25	128989	Homo sapiens chromosome 22 open reading frame 25 (C22orf25), mRNA.				chr22	18433229	18433278	GAGGTCCTCTGTGTTTGAGACAATCCTGTGTGTGCCAGGAGGCTCCGTGT
4390300	0.00505887	0.000310049	1.2963	up	TOB1	10140	Homo sapiens transducer of ERBB2, 1 (TOB1), mRNA.	GO:0007184|GO:0008285|GO:0030514|GO:0045668	GO:0005737	GO:0003714|GO:0005070|GO:0046332	chr17	48940472	48940521	CCAATGGAATGTTCCCAGGTGACAGCCCCCTTAACCTCAGTCCTCTCCAG
7550113	0.0165089	0.00150152	1.24239	down	PARP2	10038	Homo sapiens poly (ADP-ribose) polymerase 2 (PARP2), transcript variant 2, mRNA.	GO:0006284|GO:0006471	GO:0005634	GO:0003677|GO:0003950|GO:0005515|GO:0016757	chr14	19895455	19895504	CAAGGTAAACATAGCACCAAGGGGCTGGGCAAGATGGCTCCCAGTTCTGC
5290703	0.000345039	9.02898e-06	1.48974	down	DCK	1633	Homo sapiens deoxycytidine kinase (DCK), mRNA.	GO:0006139|GO:0006220	GO:0005634|GO:0005829	GO:0000166|GO:0004137|GO:0005524|GO:0016301|GO:0016740|GO:0016773|GO:0019206	chr4	72114509	72114558	CCTGCCTCAGTCTGCTTTCTCTACTGTCTGGATTAATTAGGCAGCCTGCT
1740193	0.033895	0.00404521	1.26821	up	TRIM16	10626	Homo sapiens tripartite motif-containing 16 (TRIM16), mRNA.		GO:0005622|GO:0005737	GO:0008270|GO:0046872	chr17	15554422	15554471	AGGACTGTTGCCAGGAGCACAGTGGCCACACCATAGTCTCCCTGGATGCA
1010129	0.000570744	1.74446e-05	1.72239	up	C10orf61	26123	Homo sapiens chromosome 10 open reading frame 61 (C10orf61), transcript variant 1, mRNA.				chr10	97435331	97435380	CCAGGTTCCTGTAATACTTACCTCACAGGCTAATGCTCCTCTGTTGGCTG
1770170	2.32551e-05	2.79632e-07	1.53315	down	CTDSPL	10217	Homo sapiens CTD (carboxy-terminal domain, RNA polymerase II, polypeptide A) small phosphatase-like (CTDSPL), transcript variant 2, mRNA.	GO:0008150	GO:0005575|GO:0005634	GO:0003674|GO:0004721|GO:0016787	chr3	38000522	38000571	CCGGGTAGTGGAGATGCTGGTGTCTGGGTAGTCATGGATTTCTGCTGGAC
3420487	0.0427721	0.005551	1.21807	up	MAGED2	10916	Homo sapiens melanoma antigen family D, 2 (MAGED2), transcript variant 3, mRNA.				chrX	54841885	54841934	ATCCAGGCGGGAGCAGAAGCTAAAGCCAAAGCCCAAGAGAGTGGCAGTGC
3390180	0.0442862	0.00583664	1.20363	up	RBMS1	5937	Homo sapiens RNA binding motif, single stranded interacting protein 1 (RBMS1), transcript variant 3, mRNA.	GO:0006260|GO:0006396	GO:0005575|GO:0005634	GO:0003677|GO:0003690|GO:0003697|GO:0003723|GO:0005515	chr2	160839517	160840431	AATGACCATTCTCCATATACCTTTCAACCTAATAAGTAACTGTGAGATGT
2470520	0.00106596	3.98083e-05	1.39248	up	RBMS1	5937	Homo sapiens RNA binding motif, single stranded interacting protein 1 (RBMS1), transcript variant 3, mRNA.	GO:0006260|GO:0006396	GO:0005575|GO:0005634	GO:0003677|GO:0003690|GO:0003697|GO:0003723|GO:0005515	chr2	160839018	160839067	TAGTCCGACTTCACCCATGGTGTTCTGTGCTTGCAGTGCGAGTGTTGCTG
1580161	0.000882631	3.08223e-05	1.59031	down	NETO2	81831	Homo sapiens neuropilin (NRP) and tolloid (TLL)-like 2 (NETO2), mRNA.		GO:0016020|GO:0016021	GO:0004872	chr16	47115854	47115903	GTTCACATCAGTGGCTTTGTATGCAAATATGCTGTGTTGGACCTGGACGC
5220754	0.00932721	0.000705544	1.27563	up	ATG7	10533	Homo sapiens ATG7 autophagy related 7 homolog (S. cerevisiae) (ATG7), mRNA.	GO:0006497|GO:0006511|GO:0006914|GO:0006944|GO:0008152|GO:0015031|GO:0031401	GO:0005737|GO:0005737	GO:0003824|GO:0004839|GO:0005515|GO:0005515|GO:0005515|GO:0042803	chr3	11571483	11571532	GGCCAGTGTTCGGCGTTGCTCGGGATTCAAGATACCACCAGTTCAGAGCT
2710292	0.012408	0.00103192	1.24968	down	H2AFZ	3015	Homo sapiens H2A histone family, member Z (H2AFZ), mRNA.	GO:0006334	GO:0000786|GO:0005634|GO:0005694	GO:0003677	chr4	101088553	101088602	ACTCTAACAGCTGTCCAGTGTTGGTGATTCCAGTGGACTGTATCTCTGTG
3360678	0.0440492	0.00578746	1.21206	up	NRXN2	9379	Homo sapiens neurexin 2 (NRXN2), transcript variant beta, mRNA.	GO:0007155|GO:0007155	GO:0016020|GO:0016021|GO:0016020|GO:0016021|GO:0016020|GO:0016021	GO:0005509|GO:0005515|GO:0005515	chr11	64373756	64373805	AGGCATTGTCCACAGACTGCTGGGGTCACTTCTTTGCCCACGGGCTCCCT
5890259	0.0121711	0.00100514	1.30652	up	CXorf40B	541578	Homo sapiens chromosome X open reading frame 40B (CXorf40B), mRNA.				chrX	149106450	149106499	GACTGTACTCTGAGGCCAAAAGCCAGAGTCGGCCCTGAACGCCCACGACT
6580369	0.00285494	0.000147148	1.49395	up	DYNLRB1	83658	Homo sapiens dynein, light chain, roadblock-type 1 (DYNLRB1), mRNA.	GO:0007018|GO:0007632	GO:0005737|GO:0005868|GO:0005874	GO:0003777|GO:0005515	chr20	32567868	32567917	AGAAAGGCACAGGACTCGCTAAGTGTTCGCTACGCGGGGCTACCGGATCG
1400484	0.0468148	0.00635837	1.20325	up	LDOC1	23641	Homo sapiens leucine zipper, down-regulated in cancer 1 (LDOC1), mRNA.	GO:0008285	GO:0005634	GO:0005515	chrX	140270288	140270337	CCACATCCCACCTACAGACTACCACCTTTCGAGATCAGGACCAACCTGGA
4830504	0.00748003	0.000528175	1.29102	down	PGM2	55276	Homo sapiens phosphoglucomutase 2 (PGM2), mRNA.	GO:0005975|GO:0006006|GO:0006810	GO:0005737	GO:0000287|GO:0004614|GO:0005215|GO:0005488|GO:0016853	chr4	37540592	37540641	GGTCTTACAGCCTTCCAAAATAACTCCAGTTGGGCACCCATGAGCTAGGA
2600072	0.00492197	0.000299573	1.31828	up	BOK	666	Homo sapiens BCL2-related ovarian killer (BOK), mRNA.	GO:0006917|GO:0042981|GO:0006917|GO:0042981	GO:0005575	GO:0046983	chr2	242161885	242161934	CCCCTCAGGTGCCCCCACACACAGCCTTCCCTTGACGCCTACATTTCTAG
4230678	0.00587288	0.000377049	1.29026	up	HIST2H2BE	8349	Homo sapiens histone cluster 2, H2be (HIST2H2BE), mRNA.	GO:0006334|GO:0042742	GO:0000786|GO:0005634|GO:0005694	GO:0003677|GO:0005515	chr1	149856379	149856428	CACTTACCACCTCATTTGCTTTTCTGGAGGCCATGCAATATAGGCGGGAC
5550408	0.00598176	0.000386891	1.2957	up	TMED3	23423	Homo sapiens transmembrane emp24 protein transport domain containing 3 (TMED3), mRNA.	GO:0015031	GO:0005794|GO:0016020|GO:0016021|GO:0033116		chr15	77402125	77402174	CAGCCATGCAAGCAGGACAGAATGGTGACTGGGTGCCCTTGGTGAGCTGT
1010053	0.0475393	0.00651525	1.26786	down	CCNK	8812	Homo sapiens cyclin K (CCNK), transcript variant 2, mRNA.	GO:0000079|GO:0006350|GO:0006355|GO:0006366|GO:0007049|GO:0007067|GO:0051301		GO:0005515	chr14	99047294	99047343	CATTCGGTGACATTCTCTCCCATGACACCCAGAAGGGGCAGAAGAACCAC
6290367	0.047381	0.0064679	1.1964	up	SEC61G	23480	Homo sapiens Sec61 gamma subunit (SEC61G), transcript variant 1, mRNA.	GO:0006605|GO:0065002	GO:0005783|GO:0005789|GO:0016020|GO:0016021	GO:0015450	chr7	54825217	54825266	GCAGTTTGTTGAGCCAAGTCGGCAGTTTGTAAAGGACTCCATTCGGCTGG
6980164	0.0195976	0.00190599	1.22922	down	NKIRAS2	28511	Homo sapiens NFKB inhibitor interacting Ras-like 2 (NKIRAS2), transcript variant 2, mRNA.	GO:0007249|GO:0007264|GO:0007264	GO:0005575|GO:0005622|GO:0005737|GO:0005622	GO:0000166|GO:0003924|GO:0005525|GO:0000166|GO:0005525|GO:0000166|GO:0005525	chr17	37430920	37430969	GAGGGTGGGCACACACCCAGCGGCCTGCAGAGTAAGCTTATTACCCACAA
1940129	0.0134492	0.00114584	1.26627	down	SIRPA	140885	Homo sapiens signal-regulatory protein alpha (SIRPA), transcript variant 2, mRNA.	GO:0007155	GO:0005886|GO:0005886|GO:0016021	GO:0017124	chr20	1868371	1868420	GAACCCCAGGAAAAGGAAGAGGTCGAACCAACCCTGCGGAAGGAGCATGG
5090671	0.0105418	0.0008382	1.32413	down	GDF15	9518	Homo sapiens growth differentiation factor 15 (GDF15), mRNA.	GO:0007165|GO:0007179|GO:0007267	GO:0005576|GO:0005615|GO:0005794	GO:0005125|GO:0008083	chr19	18360697	18360746	CCGGGGTGTCGCTCCAGACCTATGATGACTTGTTAGCCAAAGACTGCCAC
1850068	0.000189725	4.11047e-06	1.65948	down	C13orf27	93081	Homo sapiens chromosome 13 open reading frame 27 (C13orf27), mRNA.				chr13	102216833	102216882	CACTGGATTGAGAAGGCAAATCATTCCATGGCAGTGAAAGGACGGTCGAC
2510722	0.0185927	0.00177181	1.25186	down	SFRS16	11129	Homo sapiens splicing factor, arginine/serine-rich 16 (SFRS16), mRNA.	GO:0006397|GO:0008380	GO:0005634		chr19	50264330	50265152	CGCAAGATCCGCATGAAGGAGCGGGAACGCCGAGAGAAGGAGAGAGAAGA
7320382	0.0104513	0.000826086	1.35726	down	SLC38A1	81539	Homo sapiens solute carrier family 38, member 1 (SLC38A1), transcript variant 1, mRNA.	GO:0006811|GO:0006814|GO:0015804	GO:0005886|GO:0016021	GO:0005283|GO:0015175|GO:0015293|GO:0031402	chr12	46581916	46581965	CTCTGGTCTGAGTCAACTTTCGCTGGGGAAAACCTATGGAACCTACTGCA
3840360	0.023723	0.00248184	1.29396	down	LARP4	113251	Homo sapiens La ribonucleoprotein domain family, member 4 (LARP4), transcript variant 1, mRNA.			GO:0003723	chr12	49159963	49160012	GTACATCCTTGTATTTGTATTTGTTTTCAACATCGCCAAGGTGCTATGGG
4040048	0.0100141	0.000778718	1.34424	up	LOC653994	653994	PREDICTED: Homo sapiens similar to eukaryotic translation initiation factor 4H isoform 2, transcript variant 5 (LOC653994), mRNA.							TGGGTAGCTCTCGAGAATCTAGAGGTGGATGGGATTCCCGGGATGACTTC
4780707	0.0233673	0.00242982	1.29539	down	OTUB1	55611	Homo sapiens OTU domain, ubiquitin aldehyde binding 1 (OTUB1), mRNA.	GO:0006511|GO:0006955		GO:0008233|GO:0008234	chr11	63522203	63522252	GAGGGCAGCCTTCAAACGTGTGGGGTCTACAGTCCTCAGGTCTAGGCAGG
1260270	3.27498e-06	2.2726e-08	1.63816	up	AIM2	9447	Homo sapiens absent in melanoma 2 (AIM2), mRNA.	GO:0006955|GO:0045786	GO:0005634	GO:0005515|GO:0005515	chr1	159035730	159035779	GCTGGTGAAACCCCGAAGATCAACACGCTTCAAACTCAGCCCCTTGGAAC
5080603	0.0301032	0.00345713	1.25156	down	ACTL6A	86	Homo sapiens actin-like 6A (ACTL6A), transcript variant 2, mRNA.	GO:0001558|GO:0006338|GO:0006338|GO:0006350|GO:0006355|GO:0007165	GO:0005634|GO:0005886|GO:0016585|GO:0035267	GO:0003682|GO:0003682|GO:0005515|GO:0005524	chr3	179304377	179305723	GGAGGTTTAGCTCATGGATTGGCGGCTCCATTCTAGCCTCTTTGGGTACC
4230195	0.00529135	0.000331024	1.4557	down	NAV2	89797	Homo sapiens neuron navigator 2 (NAV2), transcript variant 2, mRNA.		GO:0005634	GO:0000166|GO:0004386|GO:0005524|GO:0016787|GO:0017111|GO:0000166|GO:0005524|GO:0017111|GO:0000166|GO:0005524|GO:0017111	chr11	20099593	20099642	TTGTCATGAGGTTTTTGGATTTGCCAATGATCTGCTGGACATCATGCCCC
4890068	0.00850373	0.000625235	1.28355	down	MAP3K11	4296	Homo sapiens mitogen-activated protein kinase kinase kinase 11 (MAP3K11), mRNA.	GO:0000080|GO:0007017|GO:0007257|GO:0008283|GO:0046328|GO:0046777|GO:0051259	GO:0005813|GO:0005874	GO:0000166|GO:0004674|GO:0004706|GO:0004713|GO:0005515|GO:0005524|GO:0016740|GO:0042803	chr11	65365373	65365422	CTGTCACCAGCACTTTTGACCAAGTCCTGCTACTGCGGCCCCTGCCCTAG
6220070	0.0043403	0.000255433	1.37188	up	NT5C	30833	Homo sapiens 5', 3'-nucleotidase, cytosolic (NT5C), mRNA.	GO:0009117|GO:0009223|GO:0016311	GO:0005634|GO:0005737|GO:0005829	GO:0000287|GO:0008253|GO:0008253|GO:0016787|GO:0019103	chr17	73126361	73126410	TCCCGAGAGGCTGTCCCTGGACCCTGGCTGGCATGGAAATACAGTGGGAA
5310110	0.0144414	0.00125075	1.31661	up	HAX1	10456	Homo sapiens HCLS1 associated protein X-1 (HAX1), transcript variant 1, mRNA.		GO:0005739|GO:0005625|GO:0005634|GO:0005739|GO:0005783|GO:0015629|GO:0016020|GO:0031965	GO:0019966|GO:0047485	chr1	152512517	152512566	CCGTGGGAACCCAAGGTTCCATAGTCCTCAGCACCCCCCTGAGGAATTTG
60022	0.0249054	0.00265703	1.28208	down	C3orf39	84892	Homo sapiens chromosome 3 open reading frame 39 (C3orf39), mRNA.				chr3	43121194	43121243	AAGGGACCTGACTTCCCCTTCTCCCATCCTGAACATTTGTACCCCTGGAG
7150019	0.0227498	0.00232946	1.24059	down	OLFML2B	25903	Homo sapiens olfactomedin-like 2B (OLFML2B), mRNA.		GO:0005576|GO:0016020|GO:0031012	GO:0042803|GO:0050840	chr1	161953170	161953219	TGACCAGTAACCACCTTCCTTCAAGCCTTCAGCCCCTCCAGCTCCAAGTC
130619	0.0216913	0.00217745	1.24623	down	PRPS2	5634	Homo sapiens phosphoribosyl pyrophosphate synthetase 2 (PRPS2), transcript variant 1, mRNA.	GO:0009116|GO:0009156|GO:0009165|GO:0044249|GO:0006139|GO:0009116|GO:0009156|GO:0009165|GO:0044249		GO:0000287|GO:0004749|GO:0016301|GO:0000287|GO:0004749|GO:0016301|GO:0016740	chrX	12751996	12752045	CTGAATGGGGGTGGACCTGGCATTTATCTGGCCAAAAACAGGAGCCAGAG
7150554	0.00366442	0.000205563	1.39976	down	LCOR	84458	Homo sapiens ligand dependent nuclear receptor corepressor (LCOR), mRNA.	GO:0000122|GO:0006350|GO:0006355	GO:0005634	GO:0003700|GO:0003702|GO:0008134	chr10	98708585	98708634	GTGAAGCATGGTTGAAATTAGCTAGTGGTCCCTTTTGAATTTCATGAGCC
3850064	0.0101832	0.000796801	1.30228	down	PLCXD1	55344	Homo sapiens phosphatidylinositol-specific phospholipase C, X domain containing 1 (PLCXD1), mRNA.	GO:0006629|GO:0007242		GO:0004629	chrXY	149851	149716	GTACCCGGTTGCTACGGTGAAATGAAGGTGCCCCGCATCCAGAAAGACGC
5860411	0.000408235	1.12974e-05	1.40173	down	TUBG1	7283	Homo sapiens tubulin, gamma 1 (TUBG1), mRNA.	GO:0000212|GO:0000226|GO:0051258	GO:0000242|GO:0000794|GO:0000930|GO:0005737|GO:0005737|GO:0005816|GO:0005827|GO:0005881	GO:0000166|GO:0003924|GO:0005200|GO:0005515|GO:0005515|GO:0005525	chr17	38020497	38020546	CATCCAGGGAGATTGTGCAGCAGCTCATCGATGAGTACCATGCGGCCACA
1170446	0.00258528	0.000129277	1.34734	down	C9orf10OS	158293	Homo sapiens chromosome 9 open reading frame 10 opposite strand (C9orf10OS), mRNA.				chr9	95249019	95249068	AGAACACCAAAGGAGACCATATGGGTGAAAGCAACCAGCACTGCCCTGGC
6060685	0.00581099	0.00037246	1.34537	down	NUP155	9631	Homo sapiens nucleoporin 155kDa (NUP155), transcript variant 1, mRNA.	GO:0006913|GO:0015031|GO:0051028|GO:0065002	GO:0005634|GO:0005643|GO:0016020|GO:0031965	GO:0005215|GO:0017056	chr5	37342661	37342710	CTCTGCCTGGATGCTGTTTGTGGTTACCTTGTTGAGCTCCAGTCTATGAG
1430735	1.16309e-05	1.11516e-07	1.67169	down	NET1	10276	Homo sapiens neuroepithelial cell transforming 1 (NET1), transcript variant 1, mRNA.	GO:0001558|GO:0007242|GO:0035023|GO:0007242|GO:0035023	GO:0005575|GO:0005622|GO:0005634|GO:0005737|GO:0005622	GO:0005085|GO:0005089|GO:0005085|GO:0005089	chr10	5489634	5489683	GGGCGTGTAGTAAGTTGTAGAAGGCTCGAGGGGACGTGGACTTATTTGCC
7210241	0.000353576	9.36477e-06	1.47447	up	CSNK1A1	1452	Homo sapiens casein kinase 1, alpha 1 (CSNK1A1), transcript variant 1, mRNA.	GO:0006468|GO:0006468|GO:0016055	GO:0005737|GO:0005829|GO:0005829|GO:0005829|GO:0005829|GO:0005829	GO:0000166|GO:0004674|GO:0005524|GO:0016740|GO:0000166|GO:0004674|GO:0005524|GO:0016740	chr5	148876254	148876303	GTACTGCAACTGCCAGAACTTGGTATTGTAGCTGCTGCCCGCTGACTAGC
1780576	0.00700118	0.000480541	1.29295	down	MAD2L1	4085	Homo sapiens MAD2 mitotic arrest deficient-like 1 (yeast) (MAD2L1), mRNA.	GO:0007067|GO:0000070|GO:0007049|GO:0007094|GO:0031145|GO:0051301|GO:0051436	GO:0000776|GO:0005634|GO:0005816|GO:0005829|GO:0005829|GO:0005829|GO:0005829|GO:0005829|GO:0005829	GO:0005515|GO:0005515|GO:0005515|GO:0005515	chr4	121200354	121200403	CCTAAATCAGATGTTTTGGTCAAGTAGTTTGACTCAGTATAGGTAGGGAG
1450075	0.0004682	1.35207e-05	1.42444	down	ILF3	3609	Homo sapiens interleukin enhancer binding factor 3, 90kDa (ILF3), transcript variant 1, mRNA.	GO:0000279|GO:0006350|GO:0045892|GO:0045893	GO:0005622|GO:0005634|GO:0005634|GO:0005634|GO:0005739	GO:0003677|GO:0003677|GO:0003725|GO:0005515|GO:0005515|GO:0005515|GO:0016563|GO:0016564	chr19	10663902	10663951	GCAGCATAGTTGGGAGCTTCTGGATTCCATCTGCACCTGTGAGCCCCATG
3420296	4.39535e-09	3.02678e-12	2.2716	down	TGFA	7039	Homo sapiens transforming growth factor, alpha (TGFA), transcript variant 2, mRNA.	GO:0000187|GO:0001525|GO:0008283|GO:0045741|GO:0045840|GO:0050679|GO:0001525|GO:0001525	GO:0005576|GO:0005886|GO:0016021	GO:0001948|GO:0004708|GO:0004871|GO:0004871|GO:0005155|GO:0008083|GO:0001948|GO:0001948	chr2	70674936	70674985	ACCCCTGCCCTCTAGTTGGTTCTGGGCTTTGATCTCTTCCAACCTGCCCA
4120475	0.0105139	0.000834293	1.25648	up	SOX15	6665	Homo sapiens SRY (sex determining region Y)-box 15 (SOX15), mRNA.	GO:0000122|GO:0006325|GO:0008584|GO:0030154|GO:0043403|GO:0045843|GO:0045944|GO:0048627	GO:0000785|GO:0005634|GO:0005737	GO:0003682|GO:0003700|GO:0003702|GO:0005515	chr17	7491595	7491644	CCAGCAGCATCCCCTACCCCAGGCTGTCAACCCTTTCTCCTGTTGGACTA
6370474	9.49542e-07	4.5269e-09	1.90282	down	CDCA3	83461	Homo sapiens cell division cycle associated 3 (CDCA3), mRNA.	GO:0006511|GO:0007049|GO:0007067|GO:0008150|GO:0051301	GO:0005575|GO:0005737	GO:0003674	chr12	6828529	6828578	GGAAGGAGCCATTCTTGGAACTGGACGACTTCTGAAAACTGGAGGACGAG
4210196	0.0405512	0.00517255	1.20985	up	TGIF1	7050	Homo sapiens TGFB-induced factor homeobox 1 (TGIF1), transcript variant 4, mRNA.	GO:0006355|GO:0006355|GO:0000122|GO:0006355|GO:0007275	GO:0005634|GO:0005634|GO:0005634	GO:0003700|GO:0043565|GO:0003700|GO:0043565|GO:0003700|GO:0003714|GO:0005515|GO:0043565	chr18	3440265	3440314	CTGCCAGAAGATCCCGGCGGGAGGAAGCCCAAGTGTCACTTGAATTCCAC
840403	0.0164779	0.00149784	1.24255	up	TSPAN17	26262	Homo sapiens tetraspanin 17 (TSPAN17), transcript variant 2, mRNA.	GO:0016567	GO:0000151|GO:0016020|GO:0016021	GO:0004842|GO:0005515	chr5	176018525	176018574	CTGCCGGGTGGCCAGGGTATGGGGCATGTGCCCAGCAATGTGGCTCCTTG
5290300	0.043109	0.00561981	1.24784	up	ADAM10	102	Homo sapiens ADAM metallopeptidase domain 10 (ADAM10), mRNA.	GO:0006508|GO:0001701|GO:0006468|GO:0006508|GO:0007162|GO:0007162|GO:0007219|GO:0007229|GO:0007267|GO:0051089	GO:0005634|GO:0005737|GO:0005794|GO:0005798|GO:0005886|GO:0009986|GO:0012505|GO:0016021	GO:0004222|GO:0008233|GO:0008270|GO:0046872|GO:0004222|GO:0005178|GO:0008233|GO:0008270|GO:0017124|GO:0019901|GO:0042803|GO:0046872	chr15	58889100	58889149	GAATGGTGGTATTCAGTGGTCCAGGATTCTGTAATGCTTTACACAGGCAG
290730	0.000777566	2.55784e-05	1.40096	up	HIST1H2BD	3017	Homo sapiens histone cluster 1, H2bd (HIST1H2BD), transcript variant 2, mRNA.	GO:0006334	GO:0000786|GO:0005634|GO:0005694	GO:0003677	chr6	26171304	26171353	TGTGGATCCCACCCAAATCCAACTCATCCTGGTTTGCTGCACACTGGTTC
4670468	0.0216816	0.00217528	1.30253	down	TIPRL	261726	Homo sapiens TIP41, TOR signaling pathway regulator-like (S. cerevisiae) (TIPRL), transcript variant 1, mRNA.			GO:0005515	chr1	166437684	166437733	TTTTAACTTGTTGATTCAGATGTCTTGGTCCCTGAATAGTCCTAGATTAC
2810040	0.0439683	0.00576912	1.2083	up	TIPRL	261726	Homo sapiens TIP41, TOR signaling pathway regulator-like (S. cerevisiae) (TIPRL), transcript variant 1, mRNA.			GO:0005515	chr1	166419911	166420657	AGTGGCCTGTGCTGAAGAGTGGCAAGAAAGCAGGACGGAGGGTGAACACT
4810445	0.00521325	0.000323377	1.30489	up	PCOLCE2	26577	Homo sapiens procollagen C-endopeptidase enhancer 2 (PCOLCE2), mRNA.		GO:0005576	GO:0005515|GO:0005524|GO:0008201|GO:0016887	chr3	144019624	144019673	CAGAGGAGCAGCTATCTGATTGGAAACCTGCCGACTTAGTGCGGTGATAG
1090255	0.0347091	0.00417895	1.23885	up	CNPY4	245812	Homo sapiens canopy 4 homolog (zebrafish) (CNPY4), mRNA.		GO:0005576		chr7	99558415	99558464	CTGGAGCTTTGGGATGAGCCCAGCGTGGAGGTCACATACCTCAAGAAGCA
4050196	0.0121518	0.00100139	1.28189	up	RNF170	81790	Homo sapiens ring finger protein 170 (RNF170), mRNA.		GO:0016020|GO:0016021	GO:0005515|GO:0008270|GO:0046872	chr8	42829931	42829980	GTGCTAGCTAAGTTTTGTGCATTTGGAGCAGTTCTGCCTTTTCATTCTGG
1230196	0.0105139	0.000833928	1.34608	down	AHCTF1	25909	Homo sapiens AT hook containing transcription factor 1 (AHCTF1), mRNA.	GO:0006350|GO:0007275	GO:0005634|GO:0005737|GO:0016363	GO:0003677	chr1	245069444	245069493	GACAGTGTGAAAGCAGTGCGAGTGCGGCCTTTTAGTCAGGTTAGTGATGG
3290181	0.0128574	0.00107951	1.34321	up	CHMP2A	27243	Homo sapiens chromatin modifying protein 2A (CHMP2A), transcript variant 1, mRNA.	GO:0015031	GO:0005768|GO:0016020|GO:0031902	GO:0019904	chr19	63758169	63758218	CCAGAAAGAGAAGCGTGACCCGGAAGCGGAAACGGGTGTCCGTCCCAGCT
4260762	0.0195769	0.00190063	1.27144	up	CHMP2A	27243	Homo sapiens chromatin modifying protein 2A (CHMP2A), transcript variant 1, mRNA.	GO:0015031	GO:0005768|GO:0016020|GO:0031902	GO:0019904	chr19	63754899	63754948	CCTCAACTGGGGGCTCGCTTAGTGTGGCTGCTGGTGGGAAAAAAGCAGAG
4120563	0.0484946	0.0066867	1.21649	up	DST	667	Homo sapiens dystonin (DST), transcript variant 1e, mRNA.	GO:0007155|GO:0008090|GO:0031110|GO:0031122|GO:0045104|GO:0007050|GO:0007155|GO:0045104|GO:0007050|GO:0007050|GO:0007050|GO:0007010|GO:0007155|GO:0007229|GO:0030036|GO:0045104|GO:0045104	GO:0005737|GO:0015629|GO:0015630|GO:0030056|GO:0060053|GO:0005737|GO:0005856|GO:0005604|GO:0005737|GO:0005737|GO:0005856|GO:0016023|GO:0030056|GO:0030056	GO:0003779|GO:0005198|GO:0005509|GO:0005515|GO:0008017|GO:0003779|GO:0005198|GO:0005509|GO:0005515|GO:0003779|GO:0003779|GO:0005509|GO:0003779|GO:0005509|GO:0005178|GO:0005198|GO:0005509|GO:0008022|GO:0051015	chr6	56607231	56607280	GGTCCCATCTGTGTGCTTCACCGTTCCTCCACCAAACAAAGAAGCGGTGG
6110672	0.0181981	0.00171685	1.35577	up	ACP1	52	Homo sapiens acid phosphatase 1, soluble (ACP1), transcript variant 4, mRNA.	GO:0006470|GO:0006470|GO:0006470	GO:0005737|GO:0005625|GO:0005737	GO:0004725|GO:0016787|GO:0003993|GO:0004726|GO:0003993|GO:0004726|GO:0016787|GO:0042802	chr2	254956	255005	CGCGGGAAGATGGCGGAACAGGCTACCAAGTCCGTGCTGTTTGTGTGTCT
870328	0.0304762	0.00351787	1.2304	down	ECSIT	51295	Homo sapiens ECSIT homolog (Drosophila) (ECSIT), mRNA.	GO:0001707|GO:0006357|GO:0030509|GO:0045087|GO:0051341	GO:0005634|GO:0005667|GO:0005737|GO:0005739	GO:0003700|GO:0003702|GO:0004871|GO:0005515|GO:0016651	chr19	11478011	11478060	CTGCCCGAGGACCACCAGGAAGAAGACGACAACCTGCAGCGACAGCAGCA
5570731	0.000855121	2.94432e-05	1.38046	up	C8orf4	56892	Homo sapiens chromosome 8 open reading frame 4 (C8orf4), mRNA.	GO:0006915			chr8	40011701	40011750	GATGGCTGGAGATGACATTTATCCAGGGTCACTTTGTCAGGCCCTAGGAC
4810646	0.000235136	5.36835e-06	1.45733	down	PIF1	80119	Homo sapiens PIF1 5'-to-3' DNA helicase homolog (S. cerevisiae) (PIF1), mRNA.	GO:0032204|GO:0051974	GO:0000784|GO:0005634	GO:0000166|GO:0000287|GO:0003677|GO:0004386|GO:0005524|GO:0016787|GO:0017116|GO:0033682|GO:0042162|GO:0043141	chr15	65108106	65108155	TCCTTTCAGGCTGCAGAAGGGAGAGGCAATGAAGACAGGTGCTCCGGAAG
1240386	0.0220624	0.00222751	1.27699	down	KLHL21	9903	Homo sapiens kelch-like 21 (Drosophila) (KLHL21), mRNA.	GO:0006511		GO:0005515	chr1	6651211	6651260	AAAACCAGGCACCAGCCTCTGCAGCAATGGGTCCCTCTAGCCTGTGGACA
6110332	0.000937679	3.38256e-05	1.39359	down	ARHGAP19	84986	Homo sapiens Rho GTPase activating protein 19 (ARHGAP19), mRNA.	GO:0007165	GO:0005622|GO:0005634	GO:0005096	chr10	98983559	98983608	GGCCAGCGAGGAGGTGTGGGACATAATAGCCTGAGTGCTTGGGTTACCAT
6020564	0.0128574	0.00107888	1.26622	up	RRAGA	10670	Homo sapiens Ras-related GTP binding A (RRAGA), mRNA.	GO:0006915|GO:0007166|GO:0008219|GO:0008219|GO:0019048|GO:0044419|GO:0045919	GO:0005634|GO:0005634|GO:0005737|GO:0005737|GO:0005794	GO:0000166|GO:0005525|GO:0005525|GO:0042803|GO:0046982|GO:0046982|GO:0046982|GO:0051219	chr9	19040692	19040741	GGGCTTTGAAGTGTGTGCTGCTTACTCCTTTCATCTTTCTCCCCGCTTCC
2340392	6.11928e-07	2.52836e-09	1.80598	down	MELK	9833	Homo sapiens maternal embryonic leucine zipper kinase (MELK), mRNA.	GO:0006468	GO:0005737	GO:0000166|GO:0004674|GO:0005515|GO:0005524|GO:0016740	chr9	36633149	36641743	GTGCCAGCTTCAAAAACCCGATGTGGTGGGTATCAGGAGGCAGCGGCTTA
160097	7.54756e-08	1.65143e-10	2.12503	down	MELK	9833	Homo sapiens maternal embryonic leucine zipper kinase (MELK), mRNA.	GO:0006468	GO:0005737	GO:0000166|GO:0004674|GO:0005515|GO:0005524|GO:0016740	chr9	36641807	36641856	TGATGGATTCTTCCATCCTGCCGGATGAGTGTGGGTGTGATACAGCCTAC
4570670	6.72635e-05	1.12949e-06	1.51918	up	RRAS	6237	Homo sapiens related RAS viral (r-ras) oncogene homolog (RRAS), mRNA.	GO:0007265|GO:0030336	GO:0005622|GO:0005886	GO:0000166|GO:0003924|GO:0005525	chr19	54830472	54830521	CATACCCACCCTTACTTCCTGGCCTCTTCTGGGCTACTGCCACTGTGTGC
830730	0.000330857	8.4125e-06	1.93241	up	ERP29	10961	Homo sapiens endoplasmic reticulum protein 29 (ERP29), transcript variant 1, mRNA.	GO:0009306|GO:0006457|GO:0006886|GO:0009306	GO:0005788|GO:0005783|GO:0005788|GO:0042470	GO:0003756	chr12	110941975	110942024	GTTCGACACCCAGTACCCCTACGGTGAGAAGCAGGATGAGTTCAAGCGTC
4610136	0.0268577	0.00294778	1.22301	down	GPATCH4	54865	Homo sapiens G patch domain containing 4 (GPATCH4), transcript variant 2, mRNA.		GO:0005622|GO:0005622	GO:0003676|GO:0003676	chr1	156564614	156564663	CAGAAAGGAAACTGATCTCTGGGACGTCAGCTGCTGAGAGGAGCAAGCGG
1820544	0.00662114	0.00044486	1.27707	down	GPATCH4	54865	Homo sapiens G patch domain containing 4 (GPATCH4), transcript variant 2, mRNA.		GO:0005622|GO:0005622	GO:0003676|GO:0003676	chr1	156564549	156564598	GTTGAGGGAGTCAGCACAGTCCTTTCTGCAGCTTCTAACCCAGGACCATG
670609	0.0255381	0.00275565	1.23172	up	RAB2B	84932	Homo sapiens RAB2B, member RAS oncogene family (RAB2B), mRNA.	GO:0006355|GO:0007264|GO:0015031|GO:0016192|GO:0007264|GO:0007264	GO:0000139|GO:0005622|GO:0005783|GO:0005789|GO:0005794|GO:0005886	GO:0000166|GO:0005524|GO:0005525|GO:0008134|GO:0000166|GO:0005525|GO:0000166|GO:0005525	chr14	20997144	20997193	GCCAAACTTGCCTTTGCTTCACTCATCATGCAGCCTTCTGGGTTGGTTGC
6220368	0.00740793	0.000519159	1.27165	down	POGK	57645	Homo sapiens pogo transposable element with KRAB domain (POGK), mRNA.	GO:0006355|GO:0007275|GO:0006355	GO:0005622|GO:0005634|GO:0005737|GO:0005622	GO:0003677|GO:0003676	chr1	165090132	165090181	GAGTAACGGCTCTGCTGCCAGGGTTTCTCTGGGCTCATTCTTCCACTGAC
3290209	0.0067514	0.000457413	1.3229	down	UBR7	55148	Homo sapiens ubiquitin protein ligase E3 component n-recognin 7 (putative) (UBR7), transcript variant 3, mRNA.	GO:0006511	GO:0005634	GO:0004842|GO:0005515|GO:0008270|GO:0016874|GO:0046872|GO:0005515|GO:0008270|GO:0046872	chr14	92756419	92756468	AGGGAAGATTGCCCAGGCCACTGACAGGAGCGATCCCCTAATGGATACCC
6100576	0.000237184	5.43019e-06	1.52046	down	UBR7	55148	Homo sapiens ubiquitin protein ligase E3 component n-recognin 7 (putative) (UBR7), transcript variant 3, mRNA.	GO:0006511	GO:0005634	GO:0004842|GO:0005515|GO:0008270|GO:0016874|GO:0046872|GO:0005515|GO:0008270|GO:0046872	chr14	92764976	92765025	CGTGCAGCACAATAGTACCGATCAGTTAACTCAGCGCTGAAGGGCTTGTT
4250577	0.00761911	0.000541224	1.30858	up	HSPD1	3329	Homo sapiens heat shock 60kDa protein 1 (chaperonin) (HSPD1), nuclear gene encoding mitochondrial protein, transcript variant 1, mRNA.	GO:0006457|GO:0006950|GO:0002368|GO:0002755|GO:0002842|GO:0006919|GO:0006986|GO:0032727|GO:0032729|GO:0032733|GO:0032735|GO:0032755|GO:0042026|GO:0042100|GO:0043032|GO:0043065|GO:0043066|GO:0044419|GO:0048291|GO:0050821|GO:0050870|GO:0050870|GO:0050870	GO:0005615|GO:0005739|GO:0005743|GO:0005759|GO:0005769|GO:0005829|GO:0005905|GO:0009986|GO:0019907|GO:0030135|GO:0046696	GO:0005524|GO:0051082|GO:0000166|GO:0001530|GO:0002039|GO:0005524|GO:0043498|GO:0051082|GO:0051087	chr2	198364556	198364605	GAGGGGACACGGGCTCATTGCGGTGTGCGCCCTGCACTCTGTCCCTCACT
6020195	0.0183404	0.00173902	1.36117	up	UBC	7316	Homo sapiens ubiquitin C (UBC), mRNA.	GO:0006464|GO:0006464		GO:0005515	chr12	123965216	123965265	TCCAGAGAGCGGAACAGGCGAGGAAAAGTAGTCCCTTCTCGGCGATTCTG
2100484	0.0070807	0.000488725	1.41555	up	STAT3	6774	Homo sapiens signal transducer and activator of transcription 3 (acute-phase response factor) (STAT3), transcript variant 1, mRNA.	GO:0000122|GO:0006928|GO:0007165|GO:0007165|GO:0007259|GO:0007399|GO:0019221|GO:0044419	GO:0005634|GO:0005730|GO:0005737	GO:0003700|GO:0003700|GO:0004871|GO:0005062|GO:0005509|GO:0008134	chr17	40466041	40466090	GCCTCTCCTGTGCGTATGGGAACACCTAGCACGTGCTGGATGGGCTGCCT
7200021	0.00173178	7.7288e-05	1.38588	down	CUL4A	8451	Homo sapiens cullin 4A (CUL4A), transcript variant 2, mRNA.	GO:0000082|GO:0006281|GO:0006511|GO:0007050|GO:0008285|GO:0008629	GO:0031461	GO:0005515|GO:0031625	chr13	112967113	112967162	GTCTCTTTTTGAAACATGCGGGTTTGAAATATGACACCTTGTGGGTTTCC
4040279	0.00808027	0.000582543	1.32502	up	NSF	4905	Homo sapiens N-ethylmaleimide-sensitive factor (NSF), mRNA.	GO:0015031	GO:0005737	GO:0000166|GO:0000287|GO:0005515|GO:0005524|GO:0016787|GO:0017111	chr17	42188393	42188442	CCTCCACACACTTCTTCCAAAAGGAAGCACCCGTTGAGTCCTTTTGAGGG
5260138	0.00369944	0.000208508	1.30255	up	NSF	4905	Homo sapiens N-ethylmaleimide-sensitive factor (NSF), mRNA.	GO:0015031	GO:0005737	GO:0000166|GO:0000287|GO:0005515|GO:0005524|GO:0016787|GO:0017111	chr17	42188793	42188842	CCTGTGATTCCTGGTGGCCAGTATCCTGGATTCCTCTAAGATCTTGCCTC
5340504	3.96047e-05	5.59192e-07	1.58254	down	AKAP7	9465	Homo sapiens A kinase (PRKA) anchor protein 7 (AKAP7), transcript variant alpha, mRNA.	GO:0006811|GO:0007242|GO:0008104|GO:0008150|GO:0016070	GO:0005634|GO:0005886|GO:0016324|GO:0016328|GO:0005622|GO:0005737|GO:0005829	GO:0005515|GO:0019901|GO:0051018|GO:0051018|GO:0003824|GO:0051018	chr6	131604367	131604416	AAGCTCCAGGTCTTATCGTATCCCTTGCCATCTGAACTTGTTTGCACTGC
540170	0.0279327	0.00310439	1.24671	down	CCT5	22948	Homo sapiens chaperonin containing TCP1, subunit 5 (epsilon) (CCT5), mRNA.	GO:0006457	GO:0005634|GO:0005730|GO:0005737|GO:0005832	GO:0000166|GO:0005524|GO:0051082	chr5	10266280	10266329	CAGAGAACATACAGCAGCCTTCTTTGGACCACAGTCTTATCCGAGGGGTC
6040554	0.00129884	5.17389e-05	1.3713	down	WDR67	93594	Homo sapiens WD repeat domain 67 (WDR67), mRNA.	GO:0032313	GO:0005622	GO:0005097	chr8	124233315	124233364	CCGGGCTCGTCACAGATGTCAAACCCCTCATCTTTTGGCTGCATAGAATG
2450201	0.00978788	0.000753352	1.29678	down	ABCC4	10257	Homo sapiens ATP-binding cassette, sub-family C (CFTR/MRP), member 4 (ABCC4), mRNA.	GO:0006811|GO:0008150	GO:0005575|GO:0005624|GO:0005886|GO:0016021|GO:0031088	GO:0000166|GO:0005254|GO:0005524|GO:0016404|GO:0016887|GO:0042626|GO:0005524	chr13	94470560	94470609	GGTTTGAAGTGGAGTCTCATGACCTCTCAGAATAAGGTGTCACCTCCCTG
5090717	0.0204433	0.00201964	1.2289	up	C17orf95	124512	Homo sapiens chromosome 17 open reading frame 95 (C17orf95), mRNA.				chr17	72240792	72240841	GCAGGTGGTAGGACTAACATGGGGTCATATATCTTGGGATCTTCTGGCTC
1030440	0.0141074	0.00121211	1.26004	up	C17orf95	124512	Homo sapiens chromosome 17 open reading frame 95 (C17orf95), mRNA.				chr17	72237414	72237463	CCTGGCCCAGTACCTTTGGTTTCACAGAAGATCTCTGCCAGGCAAGGCCA
5420243	0.00139742	5.67761e-05	1.33825	down	MED15	51586	Homo sapiens mediator complex subunit 15 (MED15), transcript variant 1, mRNA.	GO:0006350|GO:0006355	GO:0005634|GO:0005737|GO:0005794	GO:0005515	chr22	19271648	19271697	TGTGCCGCTGGCATGAGGGCCGTGTCCCCACTGTGAAGGATGAAGAGCAA
110326	0.00876584	0.000652864	1.26807	up	RDH5	5959	Homo sapiens retinol dehydrogenase 5 (11-cis/9-cis) (RDH5), mRNA.	GO:0007601|GO:0050896|GO:0055114	GO:0016020	GO:0004745|GO:0005488|GO:0016491	chr12	54404651	54404700	CTGCCCCCACCCTGGTACTGCCTGGTGCCTGCCACAAAATAAGCACTAAC
1780762	0.00890006	0.000668047	1.2769	down	C9orf86	55684	Homo sapiens chromosome 9 open reading frame 86 (C9orf86), mRNA.	GO:0007264	GO:0005622	GO:0005525	chr9	138855074	138855123	CTCAGGGATGTGACTGAGGCCCAGGAGGGACCTGTGAGGGTCTGTTTACA
2850360	0.0101804	0.000794885	1.2736	down	BCL7B	9275	Homo sapiens B-cell CLL/lymphoma 7B (BCL7B), mRNA.	GO:0008150	GO:0005575	GO:0003779	chr7	72951274	72951323	TCTGGACGGAGCTGCTGGCAGCTTCTGCGAGAAGAGAGAGATGTGGAAGG
110440	0.0004682	1.35415e-05	1.96315	up	ITGB1	3688	Homo sapiens integrin, beta 1 (fibronectin receptor, beta polypeptide, antigen CD29 includes MDF2, MSK12) (ITGB1), transcript variant 1D, mRNA.	GO:0000082|GO:0001701|GO:0007229|GO:0008284|GO:0010002|GO:0042685|GO:0045214|GO:0045596|GO:0051726|GO:0000082|GO:0001701|GO:0007155|GO:0007160|GO:0007229|GO:0008284|GO:0010002|GO:0042685|GO:0045214|GO:0045596|GO:0051726|GO:0000082|GO:0001701|GO:0006968|GO:0007155|GO:0007156|GO:0007159|GO:0007160|GO:0007229|GO:0008284|GO:0010002|GO:0016477|GO:0030183|GO:0042685|GO:0044419|GO:0045214|GO:0045596|GO:…	GO:0019717|GO:0031594|GO:0042383|GO:0008305|GO:0019717|GO:0031594|GO:0042383|GO:0001726|GO:0008305|GO:0009986|GO:0016021|GO:0019717|GO:0031594|GO:0031594|GO:0042383|GO:0042383|GO:0042470|GO:0005783|GO:0008305|GO:0016021|GO:0019717|GO:0031594|GO:0042383	GO:0004872|GO:0005178|GO:0004872|GO:0005178|GO:0005488|GO:0004872|GO:0005178|GO:0042802|GO:0046982|GO:0004872|GO:0005178|GO:0005515	chr10	33239236	33239285	TTACCCCAGCCGGTCCAACCTGATCCTGTGTCCCATTGTAAGGAGAAGGA
270026	0.0034339	0.000187903	1.31663	down	RASSF1	11186	Homo sapiens Ras association (RalGDS/AF-6) domain family member 1 (RASSF1), transcript variant A, mRNA.	GO:0007050|GO:0007242|GO:0007265|GO:0045786	GO:0005634|GO:0005737|GO:0005813|GO:0005819|GO:0005874	GO:0005515|GO:0008270|GO:0019992|GO:0042802|GO:0046872	chr3	50367708	50367757	GGCCTGCAGCAGGAGTGGTGCAGACAGAAGTCTCCTCAATTTTTGTCTCA
2630315	0.00228227	0.000110378	1.45174	down	RNGTT	8732	Homo sapiens RNA guanylyltransferase and 5'-phosphatase (RNGTT), mRNA.	GO:0006370|GO:0006470|GO:0044419	GO:0005634|GO:0005654|GO:0005654	GO:0004484|GO:0004651|GO:0004725|GO:0008138|GO:0016740|GO:0016779|GO:0016787|GO:0016791	chr6	89378517	89378566	GGAAAAGGTGTGGATGACTCTACTGCGTGGATGGTTACATTTGCTTTCCG
4640348	0.0114309	0.00092765	1.31061	up	TRIM37	4591	Homo sapiens tripartite motif-containing 37 (TRIM37), transcript variant 2, mRNA.		GO:0005622|GO:0005737|GO:0005777|GO:0005622|GO:0005622	GO:0005515|GO:0008270|GO:0046872|GO:0005515|GO:0008270|GO:0008270	chr17	54433761	54433810	GCAGGAAGAGCATACCAGTGTGGGCGGGTTTCACGACTCCTTCATGGTCA
620180	0.00947227	0.000721032	1.39851	down	STAG2	10735	Homo sapiens stromal antigen 2 (STAG2), transcript variant 2, mRNA.	GO:0007049|GO:0007059|GO:0007067|GO:0007126|GO:0008150|GO:0051301	GO:0005634|GO:0005856	GO:0005515|GO:0005488	chrX	123063382	123063431	GTGGCTACTTGCCATTTTGACATCAACTCATTTTGCGAGGCTTAGGCAGC
1510438	0.00122994	4.83428e-05	1.4092	down	GTF3C5	9328	Homo sapiens general transcription factor IIIC, polypeptide 5, 63kDa (GTF3C5), mRNA.	GO:0006351|GO:0042791|GO:0042797	GO:0000127|GO:0005634	GO:0003677|GO:0003709|GO:0005515	chr9	134923337	134923386	GACCCTAGCACTGGCTGTGACATGCTGCTTGGTGCTGCCTCTGGTCCTGA
3890196	0.0483798	0.00665805	1.2471	up	PIGO	84720	Homo sapiens phosphatidylinositol glycan anchor biosynthesis, class O (PIGO), transcript variant 2, mRNA.	GO:0008152|GO:0016254	GO:0005783|GO:0005789|GO:0016020|GO:0016021	GO:0005515|GO:0016740	chr9	35089120	35089169	CCTGGGCATAGCTTTGGTGATGAGAGTGGATGGTGCTGTGAGCTCCTGGT
2970563	0.00121728	4.74537e-05	1.37869	up	RPRC1	55700	Homo sapiens arginine/proline rich coiled-coil 1 (RPRC1), mRNA.				chr1	36418957	36419006	GGTACCCATGCCCCCTGCCCTCGCCTGGAATCAGTGTTACTGCATCTGAT
630100	0.00702011	0.000482312	1.52008	up	SNX5	27131	Homo sapiens sorting nexin 5 (SNX5), transcript variant 1, mRNA.	GO:0007154|GO:0015031|GO:0007154|GO:0007154		GO:0005515|GO:0035091|GO:0005515|GO:0035091|GO:0005515|GO:0035091	chr20	17949388	17949437	TCTTTCTCTAGACGCGTCTTGCTGGGAGAGTGTCCGTTGCTTCCCGTCCG
1690681	0.00398217	0.00022952	1.33273	up	TNFAIP1	7126	Homo sapiens tumor necrosis factor, alpha-induced protein 1 (endothelial) (TNFAIP1), mRNA.	GO:0006813|GO:0006955|GO:0009790	GO:0005575|GO:0008076|GO:0016020	GO:0003674|GO:0005249|GO:0005515	chr17	23697670	23697719	CAGTGTCTCAGTCTTTTTTGCCGAGAAAGCACAGTAGTCTGGGACTGGGC
6100619	0.000146714	3.05427e-06	1.47318	down	LARP4B	23185	Homo sapiens La ribonucleoprotein domain family, member 4B (LARP4B), mRNA.				chr10	857345	857394	CAGGCTTCAAAACCAGTTCAGTGTATCCGGGCGACGGGTAGTGGTGGTGC
6400376	0.043372	0.00567228	1.20654	up	VPS13C	54832	Homo sapiens vacuolar protein sorting 13 homolog C (S. cerevisiae) (VPS13C), transcript variant 1B, mRNA.	GO:0008104			chr15	62167088	62167137	GGCCCTGAAGAATTTGCAGAGGGGTTAGTGATTGGAGTGAGAAGCCTCTT
7160253	0.00647626	0.000429852	1.32254	up	LAMA4	3910	Homo sapiens laminin, alpha 4 (LAMA4), mRNA.	GO:0030155|GO:0030334|GO:0045995|GO:0001568|GO:0030155|GO:0030334|GO:0045995	GO:0005606|GO:0005605|GO:0005576|GO:0005605|GO:0005606	GO:0005102|GO:0005102|GO:0005201	chr6	112537392	112537441	CCTTCACAGGCTGCATACGCCACTTTGTGATTGATGGACACCCAGTGAGC
5130435	0.00997222	0.000773352	1.29241	up	LAMA4	3910	Homo sapiens laminin, alpha 4 (LAMA4), mRNA.	GO:0030155|GO:0030334|GO:0045995|GO:0001568|GO:0030155|GO:0030334|GO:0045995	GO:0005606|GO:0005605|GO:0005576|GO:0005605|GO:0005606	GO:0005102|GO:0005102|GO:0005201	chr6	112537188	112537237	GGAAGCTTTCATCGAGTTGAACAGGACTTAAACGAATCATCAGGGACCGG
1850612	0.00243134	0.000118875	1.35969	down	PARP2	10038	Homo sapiens poly (ADP-ribose) polymerase family, member 2 (PARP2), mRNA.	GO:0006284|GO:0006471	GO:0005634	GO:0003677|GO:0003950|GO:0005515|GO:0016757	chr14	19895641	19895690	GGGAGTACAGTGCCATTAGGACCAGCAAGTGACACAGGAATTCTGAATCC
3520095	0.000341148	8.90909e-06	1.45844	down	RAD23A	5886	Homo sapiens RAD23 homolog A (S. cerevisiae) (RAD23A), mRNA.	GO:0006289|GO:0006464|GO:0043161|GO:0044419	GO:0005634	GO:0003684|GO:0003697|GO:0005515	chr19	12925269	12925318	CCATTGGAGTGGCCCAAATCTTTCCATCTAGGGCAAGTCCTGAAAGGCCC
650075	0.0156026	0.00139453	1.34311	down	ASXL2	55252	Homo sapiens additional sex combs like 2 (Drosophila) (ASXL2), mRNA.	GO:0006350|GO:0006355	GO:0005634	GO:0008270|GO:0046872	chr2	25962509	25962558	AGTCCGTTTAGAGAGCAAACCATATTGTGCCTCTTCATCTTGACCCAGGC
1940577	0.0127246	0.00106364	1.29208	up	AIFM1	9131	Homo sapiens apoptosis-inducing factor, mitochondrion-associated, 1 (AIFM1), nuclear gene encoding mitochondrial protein, transcript variant 1, mRNA.	GO:0006309|GO:0006915|GO:0008630|GO:0045454|GO:0055114	GO:0005625|GO:0005634|GO:0005737|GO:0005739|GO:0005758|GO:0005792	GO:0003677|GO:0005515|GO:0005515|GO:0009055|GO:0016491|GO:0050660	chrX	129290472	129290521	GGCTAGCTCTGGTGCATCAGGGGGCAAAATCGATAATTCTGTGTTAGTCC
70209	0.00444911	0.000263304	1.34053	down	ETV4	2118	Homo sapiens ets variant gene 4 (E1A enhancer binding protein, E1AF) (ETV4), mRNA.	GO:0006355|GO:0008045|GO:0009887|GO:0045941	GO:0005634|GO:0005730	GO:0003700|GO:0016563|GO:0043565	chr17	38961026	38961075	AGGCGCTTCCCAACTTCATACTGGCAGGAGGGTGAGGAGGTTCACTGAGC
1780403	0.0174988	0.00163423	1.23553	down	BTBD7	55727	Homo sapiens BTB (POZ) domain containing 7 (BTBD7), transcript variant 1, mRNA.			GO:0005515	chr14	93704341	93704390	GCGGTACCAAGTCCTGCTCTTCGATGGGGTGGCTGAGAGATAAAGGTTCC
6110608	0.000371427	1.0054e-05	1.46667	down	DHX30	22907	Homo sapiens DEAH (Asp-Glu-Ala-His) box polypeptide 30 (DHX30), transcript variant 2, mRNA.		GO:0005622|GO:0005737|GO:0005739	GO:0000166|GO:0003725|GO:0005524|GO:0008026|GO:0016787	chr3	47866496	47866545	AGCTGGCTGCACTTCCCCCCAGCGTACAGGAGGAGCACGGGCAGCTGCTT
2070520	0.00322926	0.000174139	1.34692	down	CDCA7	83879	Homo sapiens cell division cycle associated 7 (CDCA7), transcript variant 1, mRNA.	GO:0006350|GO:0006355|GO:0042127	GO:0005634		chr2	173941629	173941678	CTCTGCCAGTCTAGTTTCTGGGCAGGTTTCCTGTGTCAGTATTCCCCCTC
3450707	0.0165493	0.0015087	1.24253	down	TCF20	6942	Homo sapiens transcription factor 20 (AR1) (TCF20), transcript variant 2, mRNA.	GO:0006350|GO:0006355	GO:0005634	GO:0003677|GO:0003713|GO:0005515|GO:0008270|GO:0046872|GO:0005515|GO:0008270|GO:0005515|GO:0008270	chr22	42556335	42556384	GAGGGACTGTCGCTGTGATCAGAGTGGGTTAAGCTGACCAGGAACACCCA
1980500	0.00624767	0.000410047	1.27579	up	ZMAT2	153527	Homo sapiens zinc finger, matrin type 2 (ZMAT2), mRNA.		GO:0005622|GO:0005634	GO:0003677|GO:0008270|GO:0046872	chr5	140066112	140066161	GCATTGCTGCCCTGGGGCCTGATGTTCTTGGCTTCCTCAGAGCATGTAAC
3180360	0.0049608	0.000302725	1.31284	up	LOC154761	154761	Homo sapiens hypothetical LOC154761 (LOC154761), non-coding RNA.				chr7	143509439	143509488	CCCTAGCTGTGGTAGGAAGTGGCCCTCAGAGTCAAGGAGGCAGGATGAAT
2120689	0.0169795	0.00156839	1.26681	up	UBXN6	80700	Homo sapiens UBX domain protein 6 (UBXN6), mRNA.				chr19	4445564	4445613	TCTGCCCTCCTGACCTTCTCGTGGGACATGGCTGTGCTGGAGGACATCAA
2570332	0.00168956	7.33893e-05	1.43461	up	PTGR1	22949	Homo sapiens prostaglandin reductase 1 (PTGR1), mRNA.	GO:0006691|GO:0055114	GO:0005737	GO:0004022|GO:0005488|GO:0008270|GO:0016491|GO:0032440|GO:0047522	chr9	113381023	113385592	GGGCAGATTGCAAAGCTCAAGGGCTGCAAAGTTGTTGGAGCAGTAGGGTC
4780129	1.35664e-06	7.25823e-09	1.6966	down	CENPF	1063	Homo sapiens centromere protein F, 350/400ka (mitosin) (CENPF), mRNA.	GO:0000085|GO:0000085|GO:0007067|GO:0007094|GO:0008283|GO:0008283|GO:0016202|GO:0016481|GO:0042493|GO:0051301|GO:0051310|GO:0051382	GO:0000785|GO:0000922|GO:0000940|GO:0000940|GO:0000940|GO:0005634|GO:0005634|GO:0005635|GO:0005694|GO:0005737|GO:0016363	GO:0003682|GO:0008022|GO:0008134|GO:0042803|GO:0045502|GO:0046982	chr1	212904364	212904413	CCAGTGAGGGCTGCAGGCTTCCTAGAGGTGTGCTATACCATGCGTCTGTC
1740543	1.30259e-05	1.28922e-07	2.27474	up	JAK1	3716	Homo sapiens Janus kinase 1 (JAK1), mRNA.	GO:0007167|GO:0007243|GO:0018108|GO:0019221	GO:0005856|GO:0012505|GO:0016020	GO:0000166|GO:0004715|GO:0004718|GO:0005515|GO:0005524|GO:0016740	chr1	65301811	65301860	ATTGCCTCTGACGTCTGGTCTTTTGGAGTCACTCTGCATGAGCTGCTGAC
2350538	0.00104214	3.8698e-05	1.42695	up	RPS6KB2	6199	Homo sapiens ribosomal protein S6 kinase, 70kDa, polypeptide 2 (RPS6KB2), mRNA.	GO:0006412|GO:0006468|GO:0007165|GO:0043491	GO:0005654	GO:0000166|GO:0004674|GO:0005524|GO:0016740	chr11	66959398	66959447	CCACGCCCCGCGCTCAACTGCTCCCGTGGAAGATTAAAGGGCTGAATCAT
4590121	0.0203751	0.00200967	1.23463	up	TRAPPC2P1	10597	Homo sapiens trafficking protein particle complex 2 pseudogene 1 (TRAPPC2P1), non-coding RNA.				chr19	57875047	57876207	CGGAGTCCCCGCCGAAGAACCCGAGGAGCCATATATTGAAGACCATGTCT
7040068	0.0380044	0.00473093	1.21549	up	LOC653566	653566	Homo sapiens similar to Signal peptidase complex subunit 2 (Microsomal signal peptidase 25 kDa subunit) (SPase 25 kDa subunit) (LOC653566), mRNA.							AGTGGCCGTAGCGGCTTGTTGGATAAGTGGAAGATAGATGATAAGCCTGT
520138	0.0386834	0.00484413	1.25534	up	NEDD4	4734	Homo sapiens neural precursor cell expressed, developmentally down-regulated 4 (NEDD4), transcript variant 1, mRNA.	GO:0006464|GO:0006511|GO:0006464|GO:0006511|GO:0044419	GO:0005622|GO:0000151|GO:0005622|GO:0005737|GO:0005829	GO:0005515|GO:0016881|GO:0004842|GO:0005515|GO:0016874|GO:0016881	chr15	56285728	56285777	TCCGGTTTGCTGGAAGCGTTCGGAAATGGCAACTTGCGCGGTGGAGGTGT
7380719	0.000155149	3.26275e-06	1.44619	up	IGFBP6	3489	Homo sapiens insulin-like growth factor binding protein 6 (IGFBP6), mRNA.	GO:0001558|GO:0007165|GO:0008285	GO:0005576	GO:0005520	chr12	51781127	51781176	GCAACTCCAGACTGAGGTCTACCGAGGGGCTCAAACACTCTACGTGCCCA
6250196	0.0347091	0.00417705	1.21209	down	CENPP	401541	Homo sapiens centromere protein P (CENPP), mRNA.		GO:0000775|GO:0005634|GO:0005694		chr9	94414705	94415158	GTCCCACAGCGAGCCCTGGAGCTGGACAAGAACAGAGCCATAGAAACTGC
4390564	0.00847326	0.000622545	1.48189	up	NUCKS1	64710	Homo sapiens nuclear casein kinase and cyclin-dependent kinase substrate 1 (NUCKS1), mRNA.		GO:0005634		chr1	203954016	203954065	GGGTCTGAAGATGAAGCCCCTTCTGGGGAGGATTAAAAGTGATGATGGTC
5390451	0.0361479	0.00442898	1.22338	up	DKK3	27122	Homo sapiens dickkopf homolog 3 (Xenopus laevis) (DKK3), transcript variant 2, mRNA.	GO:0007275|GO:0009653|GO:0030178	GO:0005576|GO:0005615		chr11	11985210	11985259	CTCCACAAATGATGTTTTCAGGTGTCATGGACTGTTGCCACCATGTATTC
1230397	0.0368811	0.00453639	1.29918	up	TMEM69	51249	Homo sapiens transmembrane protein 69 (TMEM69), mRNA.		GO:0016020|GO:0016021		chr1	45931724	45931773	CTGGCAGGACTAATCCCCTTCGTTGCTCCACCACTGGTCATGCTGATGAC
3370747	0.00186614	8.54087e-05	1.49321	down	YEATS4	8089	Homo sapiens YEATS domain containing 4 (YEATS4), mRNA.	GO:0001558|GO:0006350|GO:0007067|GO:0016568|GO:0045893	GO:0005634|GO:0005654|GO:0016363	GO:0003700|GO:0005200|GO:0008022	chr12	68070407	68070456	GGTGGGCTTCACTGGAGAAATGGACTTACTGCAAATGCTGTGATGTTTCT
6980497	6.38562e-05	1.04183e-06	1.50536	down	H2AFX	3014	Homo sapiens H2A histone family, member X (H2AFX), mRNA.	GO:0000724|GO:0006281|GO:0006310|GO:0006334|GO:0007049|GO:0007126|GO:0007283	GO:0000786|GO:0005634|GO:0005634|GO:0005654|GO:0005654|GO:0005654|GO:0005657|GO:0005694	GO:0003684|GO:0005515	chr11	118965214	118965263	CGGGGAGGCCGCAGCACCTTCTGGAAGACTTGGCCTTCCGCTCTGACGCA
2570131	0.0262586	0.00285982	1.25274	down	HPS1	3257	Homo sapiens Hermansky-Pudlak syndrome 1 (HPS1), transcript variant 3, mRNA.	GO:0006996|GO:0007040|GO:0007601|GO:0030318|GO:0043473|GO:0050896	GO:0005624|GO:0005625|GO:0005737|GO:0005764|GO:0005887|GO:0016023	GO:0046983	chr10	100190391	100190900	CGTGCCTCCTAAGGCTTGAGTGCAGGTACCCGTGTTCCTAGAGCACAGGA
3940500	5.17628e-06	3.94843e-08	1.63078	up	OSR1	130497	Homo sapiens odd-skipped related 1 (Drosophila) (OSR1), mRNA.	GO:0001656|GO:0007507|GO:0008406|GO:0048389	GO:0005622|GO:0005634	GO:0003676|GO:0008270|GO:0046872	chr2	19551312	19551361	GCCAAGAGCCGGGCGTTATATTGCGATTGGCACTTTATGCTGACCATCGG
830564	0.00156295	6.63166e-05	1.4353	up	LMAN1	3998	Homo sapiens lectin, mannose-binding, 1 (LMAN1), mRNA.	GO:0006457|GO:0006888|GO:0007596|GO:0015031|GO:0016192	GO:0000139|GO:0005783|GO:0005789|GO:0005794|GO:0016020|GO:0016021|GO:0030017|GO:0033116	GO:0005529|GO:0005537|GO:0051082	chr18	55148365	55148414	AACCTGCCACTACATTCTGGTTTACATTAGTTACTTCATGCTGGCTGGGG
4070608	8.01693e-07	3.4823e-09	1.79744	down	CBLL1	79872	Homo sapiens Cas-Br-M (murine) ecotropic retroviral transforming sequence-like 1 (CBLL1), mRNA.	GO:0006511	GO:0005622	GO:0005515|GO:0008270|GO:0016874|GO:0046872	chr7	107187084	107187133	CATCTCTTTGTTCCCCTAGTTTAGTAAATTGACCCAGAGGTGACCATTTG
1690180	0.00108874	4.09476e-05	1.36352	down	CBLL1	79872	Homo sapiens Cas-Br-M (murine) ecotropic retroviral transforming sequence-like 1 (CBLL1), mRNA.	GO:0006511	GO:0005622	GO:0005515|GO:0008270|GO:0016874|GO:0046872	chr7	107186777	107186826	GATTGCAGGGTCCGCCTTCTCAAACCCCACTTCCTGGACCACATCATCCA
1980092	0.0416205	0.0053376	1.23362	up	CSGALNACT2	55454	Homo sapiens chondroitin sulfate N-acetylgalactosaminyltransferase 2 (CSGALNACT2), mRNA.	GO:0050652|GO:0050653	GO:0005794|GO:0016020|GO:0016021|GO:0030173	GO:0005515|GO:0016740|GO:0046872|GO:0047237	chr10	42979374	42979423	TGGACGAGGACTAAATGTGGGTGCCCGAGCTTGGGACAAGGGAGAGGTCT
2350156	0.000646167	2.05029e-05	1.40836	up	NCRNA00085	147650	Homo sapiens non-protein coding RNA 85 (NCRNA00085), non-coding RNA.				chr19	52207705	52208363	GCATCAGCGAGTGCGACAGTGTTGGCGTGGATGTTCTTTCGATGGTACTG
5670296	0.017405	0.0016219	1.25161	down	UBTF	7343	Homo sapiens upstream binding transcription factor, RNA polymerase I (UBTF), transcript variant 2, mRNA.	GO:0006355|GO:0006350|GO:0006356	GO:0005634|GO:0005654|GO:0005654|GO:0005654|GO:0005654|GO:0005654|GO:0005730|GO:0005730	GO:0003677|GO:0003677|GO:0003701|GO:0005515|GO:0005515	chr17	42284226	42284275	GTCCCAAAGAGTTTGATGAGGCCCTCCACACCTGCGGCCCAATCCAAGGT
1050082	0.0425353	0.00550675	1.23588	up	KIAA1147	57189	Homo sapiens KIAA1147 (KIAA1147), mRNA.				chr7	141356753	141356802	GACACTGCATAGATTTTGCCCTGAATACTGGTGTGCCCAGGTATGCCGTG
4480180	0.000149865	3.13576e-06	1.53622	down	DEK	7913	Homo sapiens DEK oncogene (DNA binding) (DEK), mRNA.	GO:0006357|GO:0007165|GO:0019079	GO:0005634	GO:0003677|GO:0003704|GO:0042393	chr6	18332843	18332892	GCCAGAATATAATGTGCAGGCAATCGTGGATGTCTCTGACAAAGTGTGTC
2070059	0.00354454	0.000196214	1.30779	up	PARP10	84875	Homo sapiens poly (ADP-ribose) polymerase family, member 10 (PARP10), mRNA.		GO:0005626|GO:0005634|GO:0005737|GO:0043292	GO:0003950|GO:0016757	chr8	145123317	145123366	GGCTCTGTTGTTTGAATAAACGTGAACGTGAACCCAGGCGGAAGGGACCC
6200468	5.97024e-06	4.80706e-08	1.62313	down	CKS2	1164	Homo sapiens CDC28 protein kinase regulatory subunit 2 (CKS2), mRNA.	GO:0000079|GO:0007049|GO:0007051|GO:0007127|GO:0008283|GO:0048015|GO:0051301		GO:0016538	chr9	91116007	91116056	TTTCTGCAGCGCGCCACGAGGATGGCCCACAAGCAGATCTACTACTCGGA
780528	1.85263e-05	2.10014e-07	1.89846	down	CKS2	1164	Homo sapiens CDC28 protein kinase regulatory subunit 2 (CKS2), mRNA.	GO:0000079|GO:0007049|GO:0007051|GO:0007127|GO:0008283|GO:0048015|GO:0051301		GO:0016538	chr9	91119989	91121113	CCAACAGAGTCTAGGCTGGGTTCATTACATGATTCATGAGCCAGAACCAC
4730411	0.00439037	0.000259078	1.40965	up	SFXN1	94081	Homo sapiens sideroflexin 1 (SFXN1), mRNA.	GO:0006812|GO:0006826|GO:0030218	GO:0005739|GO:0005743|GO:0016020|GO:0016021	GO:0005506|GO:0005515|GO:0008324	chr5	174887440	174887489	CTGTAGATGTTTAACGTCATAGACAGTTGGCCCTCTGTATCCGTGAGCTC
3870497	0.00598176	0.000386496	1.33261	down	FUT8	2530	Homo sapiens fucosyltransferase 8 (alpha (1,6) fucosyltransferase) (FUT8), transcript variant 3, mRNA.	GO:0001701|GO:0006491|GO:0007179|GO:0007229|GO:0007585|GO:0009312|GO:0016477|GO:0042355|GO:0043112|GO:0007179|GO:0007229|GO:0007585|GO:0016477|GO:0043112	GO:0005794|GO:0016020|GO:0016021	GO:0008424|GO:0016757|GO:0017124|GO:0016757|GO:0046921	chr14	65279249	65279298	GAGACCTGTGTGAACTATTGAGAAGATCGGAACAGCTCCTTACTCTGAGG
6560577	0.000831686	2.82398e-05	1.37535	up	HSPB3	8988	Homo sapiens heat shock 27kDa protein 3 (HSPB3), mRNA.	GO:0006986|GO:0006986			chr5	53752081	53752130	CGGTTCCTGTTCAGATGACATGGGGAAGATGATGGTTCAGCCACTGGTAC
4120711	0.0277012	0.00307225	1.24887	up	WDR20	91833	Homo sapiens WD repeat domain 20 (WDR20), transcript variant 2, mRNA.		GO:0005634|GO:0005737|GO:0005634|GO:0005737		chr14	101745307	101745356	GTCCAGGCTCTCCAAACGGAACTCTACAGACAGCCGCCCCGTAAGTGTCA
6450541	5.62562e-05	8.85056e-07	1.53278	down	PXN	5829	Homo sapiens paxillin (PXN), mRNA.	GO:0007155|GO:0007160|GO:0007165|GO:0007172	GO:0005737|GO:0005856|GO:0005875|GO:0005886|GO:0030054	GO:0008270|GO:0046872|GO:0005515|GO:0008270|GO:0017166|GO:0046872	chr12	119132960	119133009	ATGACCAGAAAGGGGCCACCGGGGTCTAATGGTGACAGTCCAAACCACTC
7570315	0.015153	0.00133245	1.44306	up	MRPL45	84311	Homo sapiens mitochondrial ribosomal protein L45 (MRPL45), nuclear gene encoding mitochondrial protein, mRNA.	GO:0006412|GO:0006886	GO:0005739|GO:0005744|GO:0005840	GO:0003735|GO:0015450	chr17	33728111	33730031	CAGACCATGACCGACTTCATACCTTGGTAACTGAACACTGTTTTCCAGAC
3800050	0.000948568	3.44696e-05	1.44965	down	ADCY3	109	Homo sapiens adenylate cyclase 3 (ADCY3), mRNA.	GO:0006171|GO:0007242|GO:0007608|GO:0050896	GO:0005886|GO:0005887	GO:0000287|GO:0004016|GO:0005516	chr2	25042096	25042145	CTTGCCTTTTGAGCTCTTGCTACAGTCGCCTTTGCTACTGCTTTAAGAGA
1430176	0.0474171	0.00647532	1.26291	up	OGT	8473	Homo sapiens O-linked N-acetylglucosamine (GlcNAc) transferase (UDP-N-acetylglucosamine:polypeptide-N-acetylglucosaminyl transferase) (OGT), transcript variant 1, mRNA.	GO:0006493|GO:0007165|GO:0007584	GO:0005634|GO:0005737|GO:0005829	GO:0005515|GO:0008375|GO:0016757	chrX	70711235	70711284	GACCTGTTTCACCAGTGTTTTACCCTTGACTGCCCCTTCTATGCTGCTTC
2230288	0.018737	0.00179847	1.24735	up	TST	7263	Homo sapiens thiosulfate sulfurtransferase (rhodanese) (TST), nuclear gene encoding mitochondrial protein, mRNA.	GO:0008272|GO:0008272|GO:0009440	GO:0005739|GO:0005743|GO:0005739|GO:0005743|GO:0005759|GO:0005856|GO:0005886	GO:0004792|GO:0016740|GO:0004792|GO:0016740	chr22	37406987	37407036	GGCCGGTTTAGTGACCCCATGACTTACAGCCGGTTCTTACCTCTTAGGTG
4780411	0.014086	0.00120773	1.26773	down	LRP8	7804	Homo sapiens low density lipoprotein receptor-related protein 8, apolipoprotein e receptor (LRP8), transcript variant 3, mRNA.	GO:0006508|GO:0006629|GO:0006897|GO:0007165|GO:0019221	GO:0016020|GO:0016021|GO:0016020|GO:0016021|GO:0005576|GO:0005886|GO:0005901|GO:0016021	GO:0004872|GO:0005509|GO:0004872|GO:0005509|GO:0004888|GO:0005509|GO:0008034|GO:0030227|GO:0030227|GO:0030229	chr1	53711532	53711581	GAGACGTTTCCAGATCAGCCCAAGTTTACTATAGAGACTGGCCCAGGCAC
1070402	0.0447011	0.00590361	1.23609	up	CANX	821	Homo sapiens calnexin (CANX), transcript variant 1, mRNA.	GO:0001525|GO:0006457|GO:0009306	GO:0005737|GO:0005783|GO:0005783|GO:0005789|GO:0016020|GO:0016021|GO:0042470	GO:0005509|GO:0005529|GO:0051082	chr5	179090717	179090766	GCCCTTGCCTCTTCCTGCCCATGTGATTGCGGTGCAGTAGTTTCTGTTGT
4640064	0.0355295	0.00431557	1.22808	down	LTBR	4055	Homo sapiens lymphotoxin beta receptor (TNFR superfamily, member 3) (LTBR), mRNA.	GO:0006915|GO:0006955|GO:0007165|GO:0043123|GO:0044419	GO:0016020|GO:0016021	GO:0004888|GO:0005515	chr12	6370712	6370761	AAGGACGTCACGGGCCCCTCTAAAGGATTCGTGGTGCTCATCCCCAAGCT
6330338	0.015501	0.00138276	1.25327	up	ITGA5	3678	Homo sapiens integrin, alpha 5 (fibronectin receptor, alpha polypeptide) (ITGA5), mRNA.	GO:0007044|GO:0007155|GO:0007157|GO:0007159|GO:0007229|GO:0007613|GO:0033631|GO:0044419	GO:0001726|GO:0005634|GO:0005737|GO:0005794|GO:0008305|GO:0009897|GO:0016020|GO:0016021|GO:0019717	GO:0004872|GO:0005178|GO:0005509|GO:0005515	chr12	54789098	54789147	GCCCAACCCTTCCCTCACCTTGGCACCAGACACCCAGGACTTATTTAAAC
5310379	0.0017169	7.62136e-05	1.35133	up	TMEM115	11070	Homo sapiens transmembrane protein 115 (TMEM115), mRNA.		GO:0016020|GO:0016021		chr3	50392192	50392241	CACTTGAGTGGGCAGCCAAGCCCAGGCTCGCAGTATCAATAAAGCAGTTC
5570646	0.0279477	0.00311099	1.2294	up	SCML1	6322	Homo sapiens sex comb on midleg-like 1 (Drosophila) (SCML1), transcript variant 1, mRNA.	GO:0006350|GO:0006355|GO:0009653	GO:0005634	GO:0003700	chrX	17678146	17678195	ACCCGATCCTCAGCCGCACTCCGAGTCCAGTGCATCCCTCAGATTTCTCT
7200243	0.00143673	5.89823e-05	1.36961	up	SERPINB7	8710	Homo sapiens serpin peptidase inhibitor, clade B (ovalbumin), member 7 (SERPINB7), transcript variant 1, mRNA.		GO:0005737	GO:0004867	chr18	59623082	59623131	GTCTTTCTTCCCACGCTCATTTCTATCATTCTCCCCCATGACCCGTCTGG
450463	0.0186	0.00177483	1.24995	up	SERPINB7	8710	Homo sapiens serpin peptidase inhibitor, clade B (ovalbumin), member 7 (SERPINB7), transcript variant 1, mRNA.		GO:0005737	GO:0004867	chr18	59623114	59623163	CCCCCATGACCCGTCTGGAAATTATGGAGAGTGCTCAACTGGTAAGGAGA
1430424	0.00656802	0.000439843	1.27687	down	RFFL	117584	Homo sapiens ring finger and FYVE-like domain containing 1 (RFFL), transcript variant 1, mRNA.	GO:0006511|GO:0006886|GO:0006915	GO:0005737|GO:0016020|GO:0016023	GO:0005515|GO:0008270|GO:0016874|GO:0046872	chr17	33336791	33336840	GGGCAGAAGCTGGCTCTCTACTTACAACCTGCTTTCTCTGCTGAAGCCTT
2450129	0.000496273	1.45638e-05	1.38729	up	FLOT2	2319	Homo sapiens flotillin 2 (FLOT2), mRNA.	GO:0007155|GO:0008544	GO:0005624|GO:0016021|GO:0016600|GO:0045121|GO:0005886|GO:0009986|GO:0016021|GO:0016600	GO:0005515|GO:0005515	chr17	27206373	27206422	GGGGCTTGGATGTTGCACTGCCCCACTGCCTGTCCCTTCTGGTAAAATAA
510368	0.00106215	3.96098e-05	1.38673	down	ZIC2	7546	Homo sapiens Zic family member 2 (odd-paired homolog, Drosophila) (ZIC2), mRNA.	GO:0006813|GO:0007275|GO:0007399|GO:0007420|GO:0030154	GO:0005622|GO:0005622|GO:0005634|GO:0008076	GO:0003676|GO:0008270|GO:0003677|GO:0005249|GO:0008270|GO:0046872	chr13	99436571	99436620	GCCGTGCCAAAGTCTCCCTTCTGTTTCTTCAGCACATTGACCCATAGCAC
3940017	0.00145337	5.98963e-05	1.4604	up	LOX	4015	Homo sapiens lysyl oxidase (LOX), mRNA.	GO:0001568|GO:0006464|GO:0007169|GO:0030199|GO:0030324|GO:0048251|GO:0055114	GO:0005576|GO:0005581	GO:0004720|GO:0005507|GO:0005515|GO:0016491|GO:0046872	chr5	121433656	121433705	CGCTGTGACATTCGCTACACAGGACATCATGCGTATGCCTCAGGCTGCAC
1470068	0.0274307	0.00302898	1.23613	up	KIAA1429	25962	Homo sapiens KIAA1429 (KIAA1429), transcript variant 2, mRNA.	GO:0006397|GO:0008380	GO:0005634		chr8	95592803	95592852	GCTCCTGTGCTCTATCCCCCTCTCAGGTCGTTTGGATAGTGATGAACAGA
1230682	3.24221e-07	1.16787e-09	1.82175	down	BIRC5	332	Homo sapiens baculoviral IAP repeat-containing 5 (BIRC5), transcript variant 1, mRNA.	GO:0000086|GO:0000086|GO:0000910|GO:0000910|GO:0006915|GO:0006916|GO:0006916|GO:0006916|GO:0006916|GO:0006916|GO:0006916|GO:0007049|GO:0007067|GO:0007067|GO:0031503|GO:0031503|GO:0031536|GO:0031536|GO:0031577|GO:0031577|GO:0043154|GO:0043154|GO:0043154|GO:0045931|GO:0045931|GO:0051303|GO:0051303	GO:0000775|GO:0000775|GO:0000775|GO:0005622|GO:0005634|GO:0005694|GO:0005730|GO:0005737|GO:0005737|GO:0005737|GO:0005814|GO:0005814|GO:0005829|GO:0005829|GO:0005876|GO:0005876|GO:0005876|GO:0005876|GO:0005881|GO:0005881|GO:0030496|GO:0030496|GO:0030496|GO:0030496|GO:0031021|GO:0031021|GO:0043234|GO:0043234|GO:0043234|GO:0043234	GO:0004869|GO:0005515|GO:0005515|GO:0005515|GO:0005515|GO:0005515|GO:0005515|GO:0005515|GO:0005515|GO:0005515|GO:0008017|GO:0008017|GO:0008270|GO:0008270|GO:0008270|GO:0042803|GO:0042803|GO:0042803|GO:0042803|GO:0043027|GO:0043027|GO:0046872|GO:0046982|GO:0046982|GO:0048037|GO:0048037|GO:0050897|GO:0051087	chr17	73732969	73733018	GCACCTGAAAGCTTCCTCGACATCTGTTAATAAAGCCGTAGGCCCTTGTC
6620626	0.0432769	0.00565089	1.25169	down	CHCHD3	54927	Homo sapiens coiled-coil-helix-coiled-coil-helix domain containing 3 (CHCHD3), mRNA.		GO:0005739|GO:0005743	GO:0005515	chr7	132469953	132470002	TGGAGTGGGGCGAGGAGAGAGCCAGAAAACATAGATCCGAGGGCAGCAGT
540519	0.0396486	0.0050028	1.21742	down	NAGLU	4669	Homo sapiens N-acetylglucosaminidase, alpha- (NAGLU), mRNA.	GO:0007399|GO:0008152|GO:0030203	GO:0005764	GO:0004561|GO:0016798	chr17	37949788	37949837	TCGCCACCACTGGGCCTTGTTTTCCGCTAATTCCAGGGCAGATTCCAGGG
5550037	5.21605e-05	8.04042e-07	1.54567	up	CNN2	1265	Homo sapiens calponin 2 (CNN2), transcript variant 2, mRNA.	GO:0007010|GO:0031032|GO:0031032	GO:0005856|GO:0005911	GO:0003779|GO:0005516|GO:0003779	chr19	989926	989975	CTTATACTGCTCCATCTTCCCCGGCCACATGCCCCGCCAAGTACTGCACA
3060523	0.000113011	2.20897e-06	2.58537	up	NAMPT	10135	Homo sapiens nicotinamide phosphoribosyltransferase (NAMPT), mRNA.	GO:0007165|GO:0007267|GO:0008284|GO:0009435	GO:0005737|GO:0005829	GO:0005125|GO:0016757|GO:0047280|GO:0047280	chr7	105925277	105925326	AATCCTGCGGCAGAAGCCGAGTTCAACATCCTCCTGGCCACCGACTCCTA
1450463	0.00876677	0.000653793	1.3073	down	SKIV2L2	23517	Homo sapiens superkiller viralicidic activity 2-like 2 (S. cerevisiae) (SKIV2L2), mRNA.	GO:0006397|GO:0008380	GO:0005634|GO:0005681	GO:0000166|GO:0003676|GO:0005515|GO:0005515|GO:0005515|GO:0005524|GO:0008026|GO:0016787|GO:0016818	chr5	54747713	54754507	GAAGGCAGCATAATTCGTTGTATGAGGCGCCTGGAAGAATTGCTTCGACA
3370255	0.0112213	0.000904098	1.30267	down	INPP5E	56623	Homo sapiens inositol polyphosphate-5-phosphatase, 72 kDa (INPP5E), mRNA.	GO:0006629|GO:0008150	GO:0000139|GO:0005575|GO:0005794|GO:0016020|GO:0000139	GO:0004437|GO:0004439|GO:0004445|GO:0016787|GO:0004437|GO:0004439	chr9	139323312	139323361	CCGTTTGCTTCTTTAACTCCAGCCGCGGAATGACATTAGTGGAACCGGGC
1110538	6.14367e-05	9.86086e-07	1.4684	down	INCENP	3619	Homo sapiens inner centromere protein antigens 135/155kDa (INCENP), transcript variant 1, mRNA.	GO:0000910|GO:0007049|GO:0007059|GO:0007067	GO:0000801|GO:0005634|GO:0005721|GO:0005819|GO:0005874|GO:0030496|GO:0043234	GO:0005515|GO:0005515|GO:0005515|GO:0005515	chr11	61676247	61676296	GGGCCCAGCCCCACATGGCCTGCAGACAGTGCTCTGTAAATAGTTGTTTT
4230735	0.0283007	0.00317967	1.24169	down	FAM129A	116496	Homo sapiens family with sequence similarity 129, member A (FAM129A), transcript variant 2, mRNA.	GO:0008150	GO:0005575	GO:0003674	chr1	184763474	184763523	GGAAGGTGTGATCTGTGGGACTGTCTGGGCCTGTTACTCATCCTGCTATC
6280719	0.000168722	3.61969e-06	1.60567	down	KIAA1524	57650	Homo sapiens KIAA1524 (KIAA1524), mRNA.		GO:0005737|GO:0016020|GO:0016021	GO:0005515	chr3	109752807	109752856	GGCTTCCTCCCTAGAGGTTCAAAAGGCACAATTAGAAGGTCGTTTGGAAG
2490017	0.0450409	0.00596473	1.20166	up	ZC3H12A	80149	Homo sapiens zinc finger CCCH-type containing 12A (ZC3H12A), mRNA.	GO:0001525|GO:0006350|GO:0006355|GO:0006915|GO:0007275|GO:0030154	GO:0005634	GO:0008270|GO:0046872	chr1	37722267	37722316	AGGCCTCATCTGTGCTCTCGCTGGGCACGTGGCTTCATGTCAGTAAGCAA
5130136	0.00747185	0.000527201	1.95621	up	CD82	3732	Homo sapiens CD82 molecule (CD82), transcript variant 1, mRNA.		GO:0005886|GO:0005887	GO:0005515	chr11	44583481	44583530	TACTTTGCTTTCCTGCTCCTGATCCTCATTGCCCAGGTGACGGCCGGGGC
7510719	0.000215558	4.8186e-06	1.44458	up	TRAF3IP2	10758	Homo sapiens TRAF3 interacting protein 2 (TRAF3IP2), transcript variant 2, mRNA.	GO:0007242|GO:0043123	GO:0005575		chr6	111986992	111987041	GTTCCTCCTGACAGTTTGATGTGTCCATTCTGGGCCTCTCAGTGCTTAGC
2570523	0.00049106	1.43328e-05	1.4132	up	ARL2BP	23568	Homo sapiens ADP-ribosylation factor-like 2 binding protein (ARL2BP), mRNA.	GO:0007165	GO:0005737|GO:0005739|GO:0005758|GO:0005813	GO:0005083	chr16	55844676	55844725	TTCTTCCTGTCAAAATCTCTCCTACCAAGATGGTGTTCCACTGTCCAGCC
6770026	1.19106e-07	3.65937e-10	1.88704	down	AURKB	9212	Homo sapiens aurora kinase B (AURKB), mRNA.	GO:0006468|GO:0007049|GO:0007067|GO:0032259|GO:0051301	GO:0000775|GO:0005634|GO:0005694	GO:0000166|GO:0000287|GO:0003676|GO:0004674|GO:0005515|GO:0005515|GO:0005524|GO:0008168|GO:0016740	chr17	8108342	8108562	CACAACGAGACCTATCGCCGCATCGTCAAGGTGGACCTAAAGTTCCCCGC
5270156	0.0135627	0.00115741	1.27548	down	BCCIP	56647	Homo sapiens BRCA2 and CDKN1A interacting protein (BCCIP), transcript variant C, mRNA.	GO:0000079|GO:0006281|GO:0007049	GO:0005634	GO:0005515	chr10	127521044	127521093	ATGGGGCACTGGGTAGAAAACACAAGTGAGAAACCCTAGATGGGCACTGC
7150132	0.0211252	0.00210789	1.37096	down	PNN	5411	Homo sapiens pinin, desmosome associated protein (PNN), mRNA.	GO:0006350|GO:0006355|GO:0006397|GO:0007155|GO:0008380|GO:0045786	GO:0005634|GO:0005681|GO:0005730|GO:0005737|GO:0005882|GO:0005886|GO:0005911|GO:0016607	GO:0003677|GO:0005198|GO:0005515	chr14	38720712	38720761	CCCGGTCCGACAGAAAGAGGTCTATATCAGAGAGTAGTCGATCAGGCAAA
7050056	0.0378183	0.00470174	1.23225	down	SRPK1	6732	Homo sapiens SFRS protein kinase 1 (SRPK1), mRNA.	GO:0006468|GO:0007059|GO:0007243|GO:0008380|GO:0030154|GO:0050684|GO:0006468	GO:0005634|GO:0005737	GO:0000166|GO:0000287|GO:0004674|GO:0005515|GO:0005515|GO:0005515|GO:0005524|GO:0016740|GO:0004674|GO:0005524	chr6	35908947	35908996	GGCAGCTGTAGATCTTGATCTTCCAGGTACCCCATGTACCTTTATTGAGC
2970044	6.67837e-05	1.1179e-06	1.51935	up	ABTB1	80325	Homo sapiens ankyrin repeat and BTB (POZ) domain containing 1 (ABTB1), transcript variant 1, mRNA.	GO:0006412	GO:0005737	GO:0003746|GO:0005515	chr3	127399706	127399755	CCATTCAGGAAGGGCTGGGGGAGTGTGTGTGGCAATAAAGCTTGAAGGCA
1070411	1.16309e-05	1.11175e-07	1.63411	down	SPC25	57405	Homo sapiens SPC25, NDC80 kinetochore complex component, homolog (S. cerevisiae) (SPC25), mRNA.	GO:0007049|GO:0007067|GO:0051301	GO:0000777|GO:0005634	GO:0005515|GO:0005515	chr2	169728031	169730109	GCAAGGGACTATGAAGTGTCAGATAGTGCCCCTCATCTTGAGGGCCTAGC
4040504	0.0117466	0.000957004	1.26024	down	POLR1E	64425	Homo sapiens polymerase (RNA) I polypeptide E, 53kDa (POLR1E), mRNA.	GO:0006350|GO:0009303	GO:0005634|GO:0005730	GO:0003677|GO:0003899|GO:0005515|GO:0005515|GO:0005515	chr9	37493099	37493148	GCCTTGCTTTAGCACAGGTATGAAGCCAGAAGCCAGCATCTCAACTGTGC
5870576	0.00586474	0.000376215	1.3868	up	C21orf33	8209	Homo sapiens chromosome 21 open reading frame 33 (C21orf33), nuclear gene encoding mitochondrial protein, transcript variant 2, mRNA.		GO:0005739		chr21	44389143	44389192	GACCAGAAAAACAAGGTGGTCACGACCCCAGCCTTCATGTGCGAGACGGC
5360379	0.0169795	0.00156951	1.24133	up	RAB2A	5862	Homo sapiens RAB2A, member RAS oncogene family (RAB2A), mRNA.	GO:0006355|GO:0006888|GO:0007264|GO:0015031|GO:0016192	GO:0000139|GO:0005622|GO:0005783|GO:0005789|GO:0005794|GO:0016020|GO:0033116|GO:0042470	GO:0000166|GO:0005525|GO:0000166|GO:0003924|GO:0005524|GO:0005525|GO:0008134	chr8	61533303	61533352	AGCAGGCTGGGGGCGGCTGCTGTTGAGTCTGTTTTTACTGTCTAGCTGCC
7210632	6.66629e-07	2.825e-09	1.7523	up	AKR1C3	8644	Homo sapiens aldo-keto reductase family 1, member C3 (3-alpha hydroxysteroid dehydrogenase, type II) (AKR1C3), mRNA.	GO:0006693|GO:0055114	GO:0005622|GO:0005737	GO:0004033|GO:0016491|GO:0047017|GO:0047026|GO:0047045|GO:0047115|GO:0050327	chr10	5137829	5138610	GCCGGTGACTGGACATATCACCTCTACTTAAATCCGTCCTGTTTAGCGAC
1780564	0.00321844	0.000173214	1.37702	up	CDC42	998	Homo sapiens cell division cycle 42 (GTP binding protein, 25kDa) (CDC42), transcript variant 3, mRNA.	GO:0007097|GO:0007264|GO:0043552|GO:0046847|GO:0051301|GO:0007097|GO:0007163|GO:0007264|GO:0030036|GO:0030225|GO:0031274|GO:0031333|GO:0043552|GO:0046847	GO:0005622|GO:0042995|GO:0005622|GO:0005737|GO:0005829|GO:0005829|GO:0005886|GO:0030175|GO:0042995	GO:0000166|GO:0003924|GO:0005525|GO:0030742|GO:0000166|GO:0003924|GO:0003924|GO:0005515|GO:0005515|GO:0005515|GO:0005515|GO:0005525|GO:0030742	chr1	22251772	22251821	AGCCGAGGAGACCCCGCGCAGTGCTGCCAACGCCCCGGTGGAGAAGCTGA
6770463	0.0301827	0.00347426	1.26402	up	CCDC103	388389	Homo sapiens coiled-coil domain containing 103 (CCDC103), mRNA.				chr17	40335983	40336032	GCCCACTGGCCTTGAGAGATGAGTGTGTGCCCAACCAAATGCTGGCTATA
5390707	0.0203681	0.00200756	1.25414	down	DIDO1	11083	Homo sapiens death inducer-obliterator 1 (DIDO1), transcript variant 3, mRNA.				chr20	61518826	61518875	GGGCAGGAGGAAACACCGCCCTCTGTAGCTGCTCGAATGGAAAGGGCTCT
3710026	0.000113011	2.20803e-06	1.48424	down	WDR62	284403	Homo sapiens WD repeat domain 62 (WDR62), transcript variant 1, mRNA.				chr19	36595544	36595685	CACCTTCCAAGAAGCCCTCGACCTTTACCGTGTGTTGGTCTCCAGTGGCC
2340706	5.24191e-05	8.10804e-07	1.5019	up	P2RX6	9127	Homo sapiens purinergic receptor P2X, ligand-gated ion channel, 6 (P2RX6), transcript variant 1, mRNA.	GO:0006811|GO:0006936|GO:0007165|GO:0006811|GO:0006811	GO:0005737|GO:0005887|GO:0016020|GO:0030054|GO:0016020|GO:0016021|GO:0016020	GO:0001614|GO:0004888|GO:0004931|GO:0005216|GO:0005524|GO:0015267|GO:0046982|GO:0004872|GO:0005216|GO:0005524|GO:0004872|GO:0005216|GO:0005524	chr22	19712238	19712287	GGCCCAGAGGAAGCTGATGTCATGGCTGGACAAAGTCACGGAGTAAAGCC
5360347	0.0233948	0.00243639	1.23724	up	NQO1	1728	Homo sapiens NAD(P)H dehydrogenase, quinone 1 (NQO1), transcript variant 1, mRNA.	GO:0006805|GO:0006809|GO:0006979|GO:0007271|GO:0009636|GO:0055114	GO:0005737	GO:0009055|GO:0016491|GO:0050662|GO:0009055|GO:0016491|GO:0050662|GO:0003955|GO:0004128|GO:0009055|GO:0016491|GO:0050662	chr16	69743410	69743459	GGCACTGGTGGTTTTTGCTCTCGACAGTATCCACAATAGCTGACGGCTGG
1770717	0.0394594	0.00496848	1.24385	down	HIRIP3	8479	Homo sapiens HIRA interacting protein 3 (HIRIP3), mRNA.	GO:0006333	GO:0005634		chr16	30004374	30004423	GCAGCTCCCAAGGACACAAGCTGTTGGGATGCTACTTCTCAGCTTCACGC
3850520	0.00385999	0.000219396	1.34917	down	PRMT5	10419	Homo sapiens protein arginine methyltransferase 5 (PRMT5), transcript variant 2, mRNA.	GO:0000387|GO:0006350|GO:0006355|GO:0007088|GO:0008283|GO:0016568|GO:0035246	GO:0005634|GO:0005737|GO:0005737|GO:0005737	GO:0008168|GO:0008469|GO:0016740|GO:0008168|GO:0016740|GO:0008168|GO:0016740	chr14	23389999	23390048	GGTGCAGTACATCTATGGGCTGTGATTCCCCTTGCCCATCAGAGAGGAGC
7380193	0.0462853	0.00625212	1.21365	up	ARPC3	10094	Homo sapiens actin related protein 2/3 complex, subunit 3, 21kDa (ARPC3), mRNA.	GO:0006928|GO:0030833|GO:0030833	GO:0005737|GO:0005885|GO:0042995|GO:0005856	GO:0003779|GO:0005200|GO:0005515	chr12	110878192	110883304	GCACTGTTGCCTATCAGAAGTCAATTCAAAGGACCTGCCCCCAGAGAGAC
6100414	0.0122209	0.00101312	1.26686	up	UPRT	139596	Homo sapiens uracil phosphoribosyltransferase (FUR1) homolog (S. cerevisiae) (UPRT), mRNA.		GO:0005634|GO:0005737	GO:0004845|GO:0016757	chrX	74440764	74440813	CCGGGGATGTCTGGATGCTGACAAGGGAGAGCCAAGTACTGTTAATGCCA
150528	0.000948568	3.4456e-05	1.92963	up	MAEA	10296	Homo sapiens macrophage erythroblast attacher (MAEA), transcript variant 2, mRNA.	GO:0007049|GO:0007155|GO:0007346|GO:0033033|GO:0043249|GO:0051301	GO:0005624|GO:0005634|GO:0005737|GO:0005819|GO:0005826|GO:0005856|GO:0005886|GO:0005887|GO:0016363	GO:0003779	chr4	1309376	1311451	TCCGCCCATGATGCTGCCCAACGGCTACGTCTACGGCTACAATTCTCTGC
3830296	0.0130039	0.00109543	1.24547	down	PCGF2	7703	Homo sapiens polycomb group ring finger 2 (PCGF2), mRNA.	GO:0006350|GO:0006355|GO:0009952|GO:0016573	GO:0001739|GO:0005634|GO:0016604|GO:0031519	GO:0003682|GO:0003700|GO:0004842|GO:0005515|GO:0008270|GO:0046872	chr17	36890319	36890368	CGCTGCCCACCGAGATTTCCTCAAGTGTGCATAGATCTGAGAGGAGTCGG
4200541	0.000531215	1.59269e-05	1.40985	up	FAM113B	91523	Homo sapiens family with sequence similarity 113, member B (FAM113B), mRNA.				chr12	45916614	45916663	ACTTCCTGGGAGTGACCCAGCGTTATTCCTGCCTCCTCACTCCTATTCTC
4390390	0.00836166	0.000610359	1.29401	down	PPIL3	53938	Homo sapiens peptidylprolyl isomerase (cyclophilin)-like 3 (PPIL3), transcript variant PPIL3b, mRNA.	GO:0006397|GO:0006457|GO:0008380	GO:0005681	GO:0003755|GO:0005515|GO:0016853|GO:0016853	chr2	201444024	201444073	GCAGGCATTTTTGAGTGGCCTGATTACATATTCCTCCCACAGCAAGTCCG
3850221	0.0383112	0.00478738	1.23325	down	DSEL	92126	Homo sapiens dermatan sulfate epimerase-like (DSEL), mRNA.		GO:0016020|GO:0016021		chr18	65173901	65173950	CGTCGTTTTTCCTTCATACGTTATCTAGTTATGCAGCACTGGAAACAGAC
6350154	0.0430827	0.00561184	1.20901	up	FAM122A	116224	Homo sapiens family with sequence similarity 122A (FAM122A), mRNA.				chr9	70587743	70587792	GCCCCTGATTTTGCCTTAAGTTCTTGCCTGAGTGATCTCCCAGCCTGTCT
7000377	0.00266116	0.000134623	1.43493	down	PHIP	55023	Homo sapiens pleckstrin homology domain interacting protein (PHIP), mRNA.	GO:0008286	GO:0005575	GO:0005158|GO:0005515	chr6	79707207	79707256	GAGGATGACTCTGAAGAGGAGCAAAGGCAGCTGTTGTTCGAAGACACCTC
2940301	0.00741411	0.000520152	1.27494	up	HPS6	79803	Homo sapiens Hermansky-Pudlak syndrome 6 (HPS6), mRNA.	GO:0006996|GO:0030318|GO:0043473		GO:0005515	chr10	103817579	103817628	CCTGGAGGCTTGCTTGGGACTGGAGGCTTGCTTGGACAGTTCCTCTGTGT
6100196	0.0141165	0.00121429	1.29026	up	ZNF653	115950	Homo sapiens zinc finger protein 653 (ZNF653), mRNA.	GO:0006350|GO:0006355	GO:0005622|GO:0005634	GO:0003677|GO:0008270|GO:0046872	chr19	11594276	11594325	CATCCTTCTCGGAGCTGGTGCCTGGGGCTGCATTGCTGGAACTGTGTCAA
3930639	0.0451252	0.00600135	1.33244	up	ACO2	50	Homo sapiens aconitase 2, mitochondrial (ACO2), nuclear gene encoding mitochondrial protein, mRNA.	GO:0006091|GO:0006099|GO:0006101|GO:0008152|GO:0006099|GO:0008152	GO:0005634|GO:0005739|GO:0005759|GO:0005634|GO:0005739	GO:0003994|GO:0003994|GO:0005506|GO:0016829|GO:0046872|GO:0051539|GO:0003994|GO:0051539	chr22	40253345	40253874	CACCAAGAGCTTTGCCAGGATCCACGAGACCAACCTGAAGAAACAGGGCC
2690324	0.0189068	0.00181798	1.26171	down	ITPRIP	85450	Homo sapiens inositol 1,4,5-triphosphate receptor interacting protein (ITPRIP), mRNA.				chr10	106072522	106072571	GCCTCCAGAAGCCAAAACCATGCCTGGATCTCCCATAGCTTCTCCTTTGC
2140228	0.00453903	0.000271457	1.29651	down	CDR2	1039	Homo sapiens cerebellar degeneration-related protein 2, 62kDa (CDR2), mRNA.		GO:0005634|GO:0005737	GO:0003674|GO:0005515	chr16	22357429	22357478	GCTGACTTGCCAGCCACAAGCTGCTCTTGCAGAGTTCTTACCATTCCTGT
4640039	0.0195917	0.00190438	1.24073	up	FER1L4	80307	Homo sapiens fer-1-like 4 (C. elegans) (FER1L4) on chromosome 20.		GO:0016020|GO:0016021		chr20	33610027	33610076	GGTCATCTTCCGTCCCCTCCACAAGTGACTCTCGCTGACCTTGGACACTC
3870242	0.0404377	0.00514949	1.24202	up	SLC25A36	55186	Homo sapiens solute carrier family 25, member 36 (SLC25A36), mRNA.	GO:0006810|GO:0006839|GO:0032355	GO:0005739|GO:0005743|GO:0016020|GO:0016021	GO:0005215|GO:0005488	chr3	142178686	142178735	TTCACTGACTGCGGCATGTCCTCGTGTCTTCTCTGATTTTGTGGTACATG
50255	3.31984e-05	4.41402e-07	1.56312	up	SNAI2	6591	Homo sapiens snail homolog 2 (Drosophila) (SNAI2), mRNA.	GO:0000122|GO:0006350|GO:0006355|GO:0007275|GO:0007499|GO:0007605|GO:0009314	GO:0005622|GO:0005634	GO:0003677|GO:0008270|GO:0046872	chr8	49993911	49993960	CCTGCACAAACATGAGGAATCTGGCTGCTGTGTAGCACACTGAGTGACGC
10220	0.0298032	0.00340531	1.24719	down	ANAPC11	51529	Homo sapiens anaphase promoting complex subunit 11 (ANAPC11), transcript variant 4, mRNA.	GO:0006511|GO:0007049|GO:0007067|GO:0016567|GO:0031145|GO:0051301|GO:0051436|GO:0051436|GO:0051437	GO:0005634|GO:0005654|GO:0005654|GO:0005654|GO:0005680|GO:0005737|GO:0005829|GO:0005829|GO:0005829|GO:0005829|GO:0005829	GO:0004842|GO:0005515|GO:0008270|GO:0046872	chr17	77451428	77451477	AGGCCTCTGGGTGCCTGTGTTCTCGGCATATAGATGTGGTCTCGGTGTGT
4810220	0.00129393	5.1475e-05	1.39771	down	KIAA0406	9675	Homo sapiens KIAA0406 (KIAA0406), mRNA.			GO:0005488	chr20	36611736	36611785	CGGCCATAGGCGGTGGCAGCGGCAGCAGAGAAGGTGAATTAGTTAGCCAA
7330544	5.83188e-06	4.66476e-08	1.71535	up	ALDOC	230	Homo sapiens aldolase C, fructose-bisphosphate (ALDOC), mRNA.	GO:0006096|GO:0008152|GO:0006000|GO:0006096|GO:0008152	GO:0005739	GO:0004332|GO:0016829|GO:0004332|GO:0005515|GO:0016829	chr17	26900217	26900266	CCATGATGAGGTAGCTTCTCCCTGGGCTCTCCTTCTTGCCTGCCCTGTCT
4150465	0.00498823	0.000304663	1.32215	down	POLR3E	55718	Homo sapiens polymerase (RNA) III (DNA directed) polypeptide E (80kD) (POLR3E), mRNA.	GO:0006350	GO:0005634	GO:0003899	chr16	22252654	22252703	ACGGTGCAGTGGACAGAAGGGATTATCCTCAGCCAGTCGCAGGGTCAGCT
2810504	0.0335151	0.00398389	1.24141	down	LOC92659	92659	Homo sapiens hypothetical LOC92659 (LOC92659), non-coding RNA.				chr17	79888221	79888270	AGCTGGAGTCAGGGCAATTCCAACCAAGAAACTGCGGCAGGCCGGGTGCA
6220746	0.000499644	1.47686e-05	1.39963	up	GLIPR1	11010	Homo sapiens GLI pathogenesis-related 1 (GLIPR1), mRNA.		GO:0005576|GO:0016020|GO:0016021		chr12	74170565	74175672	GAGGGAATTACCCAACTTGGCCATATAAGAGAGGAGCCACCTGCAGTGCC
6250730	5.28484e-05	8.20244e-07	1.5215	up	ZP1	22917	Homo sapiens zona pellucida glycoprotein 1 (sperm receptor) (ZP1), mRNA.	GO:0007338	GO:0005576|GO:0005578|GO:0005886|GO:0016021		chr11	60399185	60399234	ACGATCCTCAGGTCACCGTAATGACACTGCCAGGCCCCAGGACATCGTGA
5550195	0.0209553	0.00208687	1.23067	down	C6orf167	253714	Homo sapiens chromosome 6 open reading frame 167 (C6orf167), mRNA.			GO:0005515	chr6	97720894	97722672	TCAGAGCAGAAATGGGGCCTTGGCAGGAATATAGCACAAAGGGAAGCCTA
2260220	0.0406365	0.00518989	1.24183	up	B3GNT6	11041	Homo sapiens UDP-GlcNAc:betaGal beta-1,3-N-acetylglucosaminyltransferase 6 (B3GNT6), mRNA.	GO:0006486|GO:0016269	GO:0000139|GO:0005794|GO:0016020|GO:0016021	GO:0008378|GO:0016757|GO:0047223	chr11	65869876	65869925	GCTGTGTGGCCTTGAGTAAATCCCGTTACCTCTCTGAGCCTCGGTTACCC
6940500	0.0275491	0.00304749	1.2333	up	BDKRB1	623	Homo sapiens bradykinin receptor B1 (BDKRB1), mRNA.	GO:0007165|GO:0007186|GO:0007204	GO:0005783|GO:0005886|GO:0005886|GO:0005887	GO:0004872|GO:0004947	chr14	95800526	95800575	ATCCTCACGCTCGTGGTTGCCTTCCTGGTCTGCTGGGCCCCTTACCACTT
4610403	0.0275296	0.00304346	1.22407	down	NEURL1B	54492	Homo sapiens neuralized homolog 1B (Drosophila) (NEURL1B), mRNA.				chr5	172118167	172118216	GGAGGGGGGCTAGCATACGTGGTAGGGTTCTAGAAATCTGTGGTCATCGC
6450326	0.000495203	1.45062e-05	1.67085	up	CHMP5	51510	Homo sapiens chromatin modifying protein 5 (CHMP5), mRNA.	GO:0001919|GO:0007040|GO:0008333|GO:0015031	GO:0005634|GO:0005737	GO:0005515	chr9	33255059	33255108	TTTCTTCGCGGCTGCTCAAGATGAACCGACTCTTCGGGAAAGCGAAACCC
1400468	0.0017847	8.09365e-05	1.55284	up	YME1L1	10730	Homo sapiens YME1-like 1 (S. cerevisiae) (YME1L1), nuclear gene encoding mitochondrial protein, transcript variant 2, mRNA.	GO:0006508|GO:0030163|GO:0006508|GO:0030163	GO:0005739|GO:0016020|GO:0016020	GO:0000166|GO:0004222|GO:0005524|GO:0008233|GO:0008270|GO:0017111|GO:0046872|GO:0000166|GO:0004222|GO:0005524|GO:0017111	chr10	27448304	27448353	CTGTTGGCTTTTCCGGAGCAGAGTTGGAGAATCTTGTGAACCAGGCTGCA
5260025	0.00237154	0.000115323	1.37577	down	C16orf45	89927	Homo sapiens chromosome 16 open reading frame 45 (C16orf45), mRNA.			GO:0005515	chr16	15588972	15589021	AGAGTAGATGCTGACCTGGGCACTCCACCATTCCGGGGCACCACAGAGAT
1050681	0.00829236	0.000603544	1.32541	up	ZNF286A	57335	Homo sapiens zinc finger protein 286A (ZNF286A), mRNA.	GO:0006350|GO:0006355|GO:0006355	GO:0005622|GO:0005634|GO:0005622|GO:0005622	GO:0003677|GO:0008270|GO:0046872|GO:0003676|GO:0008270|GO:0003676	chr17	15561837	15561886	TGCTGGGTTCAAAGTCCTTAGAATTCCCTTCCTCCCTCAACAAGCTGCTG
4640427	0.0184451	0.00175482	1.30685	down	HIATL1	84641	Homo sapiens hippocampus abundant transcript-like 1 (HIATL1), mRNA.	GO:0006810|GO:0015904|GO:0046677	GO:0016020|GO:0016021	GO:0005215|GO:0005515|GO:0015520	chr9	96262208	96262257	CTCAGATTCCTGGACCTGGTGTCCTGGTTGGGTCCAAGGTGATTTTACAG
3120370	0.0268998	0.00295388	1.22962	up	CD68	968	Homo sapiens CD68 antigen (CD68), mRNA.		GO:0005624|GO:0005765|GO:0005768|GO:0005886|GO:0016021		chr17	7426110	7426153	GACGGGGTTTTCCTTGCTCCTGCCAGGATTAAAAGTCCATGAGTTTCTTG
3400619	0.00173178	7.75162e-05	1.35683	up	CRELD1	78987	Homo sapiens cysteine-rich with EGF-like domains 1 (CRELD1), transcript variant 1, mRNA.		GO:0016020|GO:0016021	GO:0005509|GO:0005509	chr3	9961533	9961582	GGTGGCTGCTAGAGCTTTGGCCCCTGCTTAGGATTAGGTGGTCCTCACAG
990189	6.39077e-05	1.05137e-06	1.53975	down	CEP152	22995	Homo sapiens centrosomal protein 152kDa (CEP152), mRNA.		GO:0005813		chr15	49030588	49030637	GGAGCCAGGAAAGATCAGTGTGAATTGTGGACACCCATCTCGTCATAAGG
270168	0.00200317	9.34574e-05	1.39055	up	HLA-DRA	3122	Homo sapiens major histocompatibility complex, class II, DR alpha (HLA-DRA), mRNA.	GO:0002504|GO:0006955|GO:0002504|GO:0006955|GO:0006955|GO:0002504|GO:0006955	GO:0016020|GO:0016021|GO:0042613|GO:0005764|GO:0005886|GO:0005886|GO:0005886|GO:0005886|GO:0005886|GO:0005887|GO:0005887|GO:0042613|GO:0016020|GO:0016021|GO:0042613	GO:0032395|GO:0032395	chr6	32411585	32411634	CCTGGGCCTGACTGTGGGTCTGGTGGGCATCATTATTGGGACCATCTTCA
5860730	0.00259368	0.000129972	1.41196	up	ZFAND6	54469	Homo sapiens zinc finger, AN1-type domain 6 (ZFAND6), mRNA.	GO:0007165|GO:0008150	GO:0005575	GO:0003674|GO:0003677|GO:0005515|GO:0008270|GO:0046872	chr15	78199885	78201147	AAGCCCACCTGCAACCTCTGTCAGTAGTCTGTCTGAATCTTTACCAGTTC
6900368	7.73826e-05	1.32401e-06	1.50334	down	UBE2C	11065	Homo sapiens ubiquitin-conjugating enzyme E2C (UBE2C), transcript variant 2, mRNA.	GO:0043687|GO:0051246|GO:0006511|GO:0043687|GO:0051246|GO:0043687|GO:0051246|GO:0006511|GO:0043687|GO:0051246|GO:0006511|GO:0007049|GO:0007051|GO:0007067|GO:0008054|GO:0016567|GO:0031145|GO:0031536|GO:0043687|GO:0048015|GO:0051246|GO:0051301|GO:0051436|GO:0051436|GO:0051437	GO:0005654|GO:0005654|GO:0005654|GO:0005829|GO:0005829|GO:0005829|GO:0005829|GO:0005829	GO:0019787|GO:0016874|GO:0019787|GO:0019787|GO:0016874|GO:0019787|GO:0004842|GO:0016874	chr20	43877439	43877488	GTGGGGAGCATCAGAACCAGCTCAACAGTTTGTCTACTGTCCGGTCCCAG
2710605	0.0172885	0.00160632	1.27451	down	FMNL2	114793	Homo sapiens formin-like 2 (FMNL2), mRNA.	GO:0006355|GO:0016043|GO:0030036	GO:0005634|GO:0005737	GO:0003700|GO:0003779|GO:0017048	chr2	153213723	153213772	AGTGTACCTATTTACAGAAAGATTAAACTGCCACCTGCGGGCACATTCCC
7550484	0.0439683	0.00576829	1.21121	up	SRGN	5552	Homo sapiens serglycin (SRGN), mRNA.	GO:0001503|GO:0006915|GO:0030502|GO:0033364|GO:0033371|GO:0033373|GO:0033382|GO:0050710|GO:0051605	GO:0005576|GO:0005615|GO:0005794|GO:0042629	GO:0005515|GO:0005515	chr10	70533801	70533850	CCTTAGGTCTCTTGACAGGAATCTGCCCTCAGACAGCCAGGACTTGGGTC
360500	0.00200317	9.34843e-05	1.33307	up	SRGN	5552	Homo sapiens serglycin (SRGN), mRNA.	GO:0001503|GO:0006915|GO:0030502|GO:0033364|GO:0033371|GO:0033373|GO:0033382|GO:0050710|GO:0051605	GO:0005576|GO:0005615|GO:0005794|GO:0042629	GO:0005515|GO:0005515	chr10	70526868	70526917	GTACCAATGGGTGCGCTGCAATCCAGACAGTAATTCTGCAAACTGCCTTG
4830343	0.0278689	0.00309572	1.22609	down	ORC6L	23594	Homo sapiens origin recognition complex, subunit 6 like (yeast) (ORC6L), mRNA.	GO:0006260|GO:0006260	GO:0005634|GO:0005654|GO:0005654|GO:0005654|GO:0005654|GO:0005654|GO:0005654|GO:0005654|GO:0005654|GO:0005664	GO:0003677|GO:0005515	chr16	45287477	45288898	GTGGTTGAAGCCCCAGCAAAGGAAATGGAGAAGGTAGAGGAGATGCCACA
4390543	0.00707734	0.000488119	1.32668	down	ATN1	1822	Homo sapiens atrophin 1 (ATN1), transcript variant 1, mRNA.	GO:0000122|GO:0009404|GO:0000122|GO:0007417|GO:0008219|GO:0009404	GO:0005737|GO:0005634|GO:0005737	GO:0003714|GO:0005515|GO:0050827|GO:0003714|GO:0019904|GO:0050827	chr12	6921542	6921591	CTGTTAGATGTGGCTGTTTTGCGTAGCATCGTGTGCCACCCCTGCCCCTC
4480523	0.0185992	0.00177341	1.2992	up	PIK3CB	5291	Homo sapiens phosphoinositide-3-kinase, catalytic, beta polypeptide (PIK3CB), mRNA.	GO:0000187|GO:0001952|GO:0006874|GO:0006935|GO:0007156|GO:0007165|GO:0007186|GO:0030168|GO:0040016|GO:0046854|GO:0048015	GO:0005829|GO:0005942	GO:0004428|GO:0005488|GO:0016303|GO:0016740|GO:0016773|GO:0043560|GO:0046934	chr3	139856945	139856994	GAGGCGCTCAGGGAAAGCTGGACTACTAAAGTGAACTGGATGGCCCACAC
2760520	0.00333175	0.00018092	1.30514	down	C18orf54	162681	Homo sapiens chromosome 18 open reading frame 54 (C18orf54), mRNA.		GO:0005576		chr18	50162155	50162204	GTTTTGGGTGGTGCCTCTTATACTATGTTGTATTCCTAGACAAGGAAATG
5220767	0.0459609	0.00618639	1.21725	up	FLNB	2317	Homo sapiens filamin B, beta (actin binding protein 278) (FLNB), mRNA.	GO:0007016|GO:0007165|GO:0007275|GO:0007519|GO:0030036|GO:0030154	GO:0001725|GO:0005634|GO:0005737|GO:0005737|GO:0005925|GO:0015629|GO:0016021	GO:0003779|GO:0005515|GO:0005515|GO:0003779	chr3	58132673	58132722	GAGGTGTAGGGAATTTTGCCTGCCTTCCTGCAGACCTGAGCTGGCTTTGG
1980326	4.45084e-05	6.54947e-07	1.50282	up	TMEM90B	79953	Homo sapiens transmembrane protein 90B (TMEM90B), mRNA.		GO:0016020|GO:0016021		chr20	24524090	24524139	CTCCCAATCACCGCGCTGGCGGATGCTCACCCCGTCATAAGCAGAAACTA
1510553	0.0338258	0.00403337	1.24034	up	DACT1	51339	Homo sapiens dapper, antagonist of beta-catenin, homolog 1 (Xenopus laevis) (DACT1), transcript variant 1, mRNA.	GO:0007275|GO:0016055	GO:0005634|GO:0005737	GO:0005515	chr14	58184161	58184210	GACTTGGAGGCCAAACCTTAAATCCAGAGATAGCAGCCTCGATAGGGACC
2510239	0.000359745	9.58533e-06	1.404	down	TRIM56	81844	Homo sapiens tripartite motif-containing 56 (TRIM56), mRNA.		GO:0005622	GO:0005515|GO:0008270|GO:0046872	chr7	100520197	100520246	GGGCCAAAGAGGTGTTAGGTTCAAAGGCTGCGAAGAGAATAGGCTACTGG
7380138	0.0456445	0.00612532	1.21694	up	TCEAL8	90843	Homo sapiens transcription elongation factor A (SII)-like 8 (TCEAL8), transcript variant 1, mRNA.	GO:0006350|GO:0006355	GO:0005634	GO:0003746	chrX	102509537	102509586	CGCGACACAAATCGAGGTGAGGGAAGAGAGAGGAAAATCCCCTGAATCCC
7400707	0.0301596	0.0034652	1.24353	up	C1S	716	Homo sapiens complement component 1, s subcomponent (C1S), transcript variant 1, mRNA.	GO:0006508|GO:0006508|GO:0006958|GO:0045087	GO:0005576|GO:0005576	GO:0003824|GO:0004252|GO:0005509|GO:0004252|GO:0005509|GO:0008233	chr12	7048199	7048248	ACCCCCCGTGAGGACTAATCCAGATACATCCCACCAGCCTCTCCAAGGGT
580491	0.00528885	0.000330475	1.29103	up	FLNC	2318	Homo sapiens filamin C, gamma (actin binding protein 280) (FLNC), mRNA.		GO:0005737|GO:0005737|GO:0005856|GO:0005886	GO:0003779|GO:0005515	chr7	128286512	128286561	CAGCTGGGAGCTGCTTAGGTGGAAAACTCCAAATAAAGTGCGGCTGTCGC
5690437	0.00199991	9.31199e-05	1.34652	down	ILF2	3608	Homo sapiens interleukin enhancer binding factor 2, 45kDa (ILF2), mRNA.	GO:0006350|GO:0006955|GO:0045893	GO:0005634|GO:0005730	GO:0003677|GO:0003677|GO:0003702|GO:0003725|GO:0005515|GO:0005515|GO:0005515|GO:0005524|GO:0016740	chr1	153634791	153634840	GGGAAGACTGGAGCCTAAGCTGCCTGCTACTGGGCTTTACATGGTGACAG
6110494	0.00947351	0.000721628	1.40414	up	GNAQ	2776	Homo sapiens guanine nucleotide binding protein (G protein), q polypeptide (GNAQ), mRNA.	GO:0001501|GO:0001508|GO:0007165|GO:0007186|GO:0007189|GO:0007215|GO:0007507|GO:0007610|GO:0009791|GO:0016322|GO:0021884|GO:0042733|GO:0045634|GO:0048066|GO:0060158|GO:0001501|GO:0001508|GO:0006471|GO:0007165|GO:0007186|GO:0007189|GO:0007202|GO:0007215|GO:0007507|GO:0007596|GO:0007610|GO:0009791|GO:0016322|GO:0021884|GO:0042733|GO:0045634|GO:0048066|GO:0060158	GO:0005886|GO:0005737|GO:0005886|GO:0005886|GO:0005886|GO:0005886|GO:0005886	GO:0000166|GO:0004871|GO:0005525|GO:0019001|GO:0000166|GO:0003924|GO:0004871|GO:0005525|GO:0019001	chr9	80335817	80335866	CCCGCTAATTCATACCTCCCTCCTGATGTTTTTCCCAGGTTACAATGGCC
4860064	0.0466621	0.00633253	1.21549	up	DDX19B	11269	Homo sapiens DEAD (Asp-Glu-Ala-As) box polypeptide 19B (DDX19B), transcript variant 2, mRNA.	GO:0006406|GO:0015031|GO:0065002	GO:0005634|GO:0005643|GO:0005737|GO:0016020|GO:0031965	GO:0000166|GO:0003723|GO:0005515|GO:0005524|GO:0008026|GO:0016787	chr16	68925046	68925095	GTTCAGGGCACAGGCCCCGACATCACCCCAAGGACAACGGCACAAGTAGA
2480291	5.12985e-05	7.79885e-07	1.65026	up	SNRPN	6638	Homo sapiens small nuclear ribonucleoprotein polypeptide N (SNRPN), transcript variant 3, mRNA.	GO:0008380	GO:0005634|GO:0005681|GO:0030532	GO:0003723|GO:0042802	chr15	22770551	22770600	GCTCCATCTACTCTTTGAAGCTTCTGCCCAGCTTGCATTGTTTCTAGGAG
4610669	3.20945e-08	5.27031e-11	2.20508	down	NEK2	4751	Homo sapiens NIMA (never in mitosis gene a)-related kinase 2 (NEK2), mRNA.	GO:0000070|GO:0006468|GO:0007049|GO:0007088|GO:0007126|GO:0051301	GO:0000794|GO:0000922|GO:0005634|GO:0005737|GO:0005813|GO:0005829|GO:0030496	GO:0000166|GO:0000287|GO:0004674|GO:0005515|GO:0005515|GO:0005524|GO:0016740	chr1	211836142	211836191	CTGTTTAACAGAATATGAGCTGTCTGTCATTTACCTACTTCTTTCCCACT
6380093	2.24586e-05	2.67676e-07	1.60768	up	PLD3	23646	Homo sapiens phospholipase D family, member 3 (PLD3), transcript variant 1, mRNA.	GO:0008152|GO:0016042	GO:0005783|GO:0005789|GO:0016020|GO:0016021	GO:0004630|GO:0016787	chr19	45576162	45576211	CCCTGGCCCACCCCCACTTTCCAGGGCAAAAAGGGCCCAGGGTTATAATA
4260017	0.00301789	0.000158748	1.45863	up	CDK5RAP2	55755	Homo sapiens CDK5 regulatory subunit associated protein 2 (CDK5RAP2), transcript variant 2, mRNA.	GO:0007420|GO:0045664	GO:0005813|GO:0005856	GO:0008017|GO:0042808	chr9	123163125	123165094	CTGGGAACAAAGGGTCCACACCCAGCACCACTGAGCAAGTTTGTGAGCAG
1240307	0.046272	0.00624675	1.32435	up	UBL7	84993	Homo sapiens ubiquitin-like 7 (bone marrow stromal cell-derived) (UBL7), transcript variant 1, mRNA.	GO:0006464|GO:0006511		GO:0005515	chr15	74753380	74753429	TGGGCAGCGCGGGCTCGATGTGTGTCAGCCAAGTAGCTGGTCCCACTGGA
1470368	0.0120146	0.000986304	1.37835	up	FAM127C	441518	Homo sapiens family with sequence similarity 127, member C (FAM127C), mRNA.				chrX	134156442	134156491	GCGATGGAAGGTCGAGTGCAGCTGATGAAGGCCCTCCTGGCTCGGCCCCT
5810274	0.0166384	0.00151859	1.33878	up	FNTA	2339	Homo sapiens farnesyltransferase, CAAX box, alpha (FNTA), transcript variant 1, mRNA.	GO:0018346|GO:0018346|GO:0007179|GO:0018347|GO:0018348|GO:0045213	GO:0005737|GO:0005829	GO:0008318|GO:0004660|GO:0016740|GO:0004660|GO:0004662|GO:0005515|GO:0005515|GO:0016740|GO:0030548	chr8	42914263	42914312	CCGGTGCCGCAGAATGATGGCCCCAATCCCGTGGTCCAGATCATTTATAG
3180450	0.000996319	3.6627e-05	1.4883	down	C16orf72	29035	Homo sapiens chromosome 16 open reading frame 72 (C16orf72), mRNA.				chr16	9120811	9120860	ACGTCATAGCTCCTTAGTTCTGCTCCTGTCGCCCTAACTTGGCATGGGCA
6250040	0.022934	0.00235682	1.31517	down	NAB1	4664	Homo sapiens NGFI-A binding protein 1 (EGR1 binding protein 1) (NAB1), mRNA.	GO:0001958|GO:0006355|GO:0014037|GO:0016481|GO:0042552|GO:0045449|GO:0045682	GO:0005634|GO:0005634|GO:0005737|GO:0005886	GO:0016564|GO:0030528	chr2	191265276	191265325	CTTCCAACTTCCAATATTTATCCATTCGTTGTGGACCCACAGATTGCATC
5890112	0.0467446	0.00634635	1.23897	down	ACBD3	64746	Homo sapiens acyl-Coenzyme A binding domain containing 3 (ACBD3), mRNA.	GO:0006694|GO:0006810	GO:0000139|GO:0005739|GO:0005794|GO:0016020|GO:0016021	GO:0000062|GO:0005515	chr1	226332759	226332808	CCCAGCTCATAGGTGTTCATACTGTTACATCCAGAACATTTGTCAGGCTC
5360086	4.42355e-05	6.46732e-07	1.61321	down	WDR82	80335	Homo sapiens WD repeat domain 82 (WDR82), mRNA.		GO:0005634		chr3	52289328	52289377	CTTCACATATCTGCAACCAGAGCAGCCACCAAGCATTACTTAGCAGCAGG
4040491	0.012455	0.00103649	1.3004	up	ITGB1	3688	Homo sapiens integrin, beta 1 (fibronectin receptor, beta polypeptide, antigen CD29 includes MDF2, MSK12) (ITGB1), transcript variant 1E, mRNA.	GO:0000082|GO:0001701|GO:0007229|GO:0008284|GO:0010002|GO:0042685|GO:0045214|GO:0045596|GO:0051726|GO:0000082|GO:0001701|GO:0007155|GO:0007160|GO:0007229|GO:0008284|GO:0010002|GO:0042685|GO:0045214|GO:0045596|GO:0051726|GO:0000082|GO:0001701|GO:0006968|GO:0007155|GO:0007156|GO:0007159|GO:0007160|GO:0007229|GO:0008284|GO:0010002|GO:0016477|GO:0030183|GO:0042685|GO:0044419|GO:0045214|GO:0045596|GO:…	GO:0019717|GO:0031594|GO:0042383|GO:0008305|GO:0019717|GO:0031594|GO:0042383|GO:0001726|GO:0008305|GO:0009986|GO:0016021|GO:0019717|GO:0031594|GO:0031594|GO:0042383|GO:0042383|GO:0042470|GO:0005783|GO:0008305|GO:0016021|GO:0019717|GO:0031594|GO:0042383	GO:0004872|GO:0005178|GO:0004872|GO:0005178|GO:0005488|GO:0004872|GO:0005178|GO:0042802|GO:0046982|GO:0004872|GO:0005178|GO:0005515	chr10	33286695	33286744	GGCCCGAACGGCCCCTGACACCTGCGGTCTCCCGCCGGGCTGGGCAAGCG
3830653	0.0416515	0.00535169	1.2105	down	DNAJB2	3300	Homo sapiens DnaJ (Hsp40) homolog, subfamily B, member 2 (DNAJB2), transcript variant 2, mRNA.	GO:0006457|GO:0006986		GO:0031072|GO:0051082	chr2	219859747	219859796	GGGAGTGGTGGAGCCAGTCGCTGTAACACTGAGCCTCAGAGACGAACCAA
6650121	0.0154027	0.00136665	1.30142	down	C1orf71	163882	Homo sapiens chromosome 1 open reading frame 71 (C1orf71), mRNA.		GO:0016020|GO:0016021|GO:0043234		chr1	244896962	244897011	AAATCTGTCCGTTAGGTGGCCTTTCCTTATCTGAGGTGTAGTGGTCTAAC
5560543	0.0499503	0.00696415	1.20959	down	CBR3	874	Homo sapiens carbonyl reductase 3 (CBR3), mRNA.	GO:0055114	GO:0005737	GO:0004090|GO:0005488|GO:0016491	chr21	36440497	36440546	AGCTGACAGGATTCTGGTGAATGCGTGCTGCCCAGGACCAGTGAAGACAG
2470220	0.0448868	0.0059372	1.28511	down	SRGAP1	57522	Homo sapiens SLIT-ROBO Rho GTPase activating protein 1 (SRGAP1), mRNA.	GO:0007165|GO:0007266|GO:0016477	GO:0005622	GO:0005096|GO:0005100|GO:0005515|GO:0017048	chr12	62823596	62823645	CCCTGTGTTCTCCTCTGTGGAAATGAAGGCAGCAAGAAGCACCTGAGGCC
1050195	4.51849e-08	8.13798e-11	1.97348	down	KIF20A	10112	Homo sapiens kinesin family member 20A (KIF20A), mRNA.	GO:0007018|GO:0015031|GO:0016192	GO:0005654|GO:0005794|GO:0005874|GO:0005875	GO:0000166|GO:0003777|GO:0005215|GO:0005524	chr5	137550940	137550989	GATCCTACGCTCACGGCGTTCCCCTTTACTCAAATCTGGGCCTTTTGGCA
4280100	0.0203324	0.00199899	1.35702	down	FAT1	2195	Homo sapiens FAT tumor suppressor homolog 1 (Drosophila) (FAT1), mRNA.				chr4	187746056	187746105	GGAAAGTGTAACGGGGACCTTCTGCATACCTGTTTAGAACCAAAACCACC
940471	0.0420166	0.00541956	1.21547	up	C5orf13	9315	Homo sapiens chromosome 5 open reading frame 13 (C5orf13), mRNA.	GO:0017015		GO:0005515	chr5	111093165	111093214	CAGGGCAGGCCTTGTTCTGAACTGTTTCGCTTCTGACTGTTAAACACCGA
3850168	0.000328645	8.28663e-06	2.02621	down	LOC644936	644936	Homo sapiens cytoplasmic beta-actin pseudogene (LOC644936), non-coding RNA.			GO:0005515	chr5	79595198	79595247	CATGGGATGCATTGTTACAGGAAGTCCCTTGCCCTCCTAAAAGCCACCTC
830528	0.0445622	0.00587774	1.20168	up	ASCC1	51008	Homo sapiens activating signal cointegrator 1 complex subunit 1 (ASCC1), mRNA.	GO:0006355	GO:0005737	GO:0003723	chr10	73856408	73856457	GTGCGTACCACACTCTGTTCCTCCATCAGTGAACACTTGGCTTGCTTCCT
4210754	0.0141966	0.00122278	1.28135	down	SERBP1	26135	Homo sapiens SERPINE1 mRNA binding protein 1 (SERBP1), transcript variant 3, mRNA.	GO:0043488	GO:0005634|GO:0005737	GO:0003723|GO:0003730|GO:0005515	chr1	67874017	67874066	GTTCCTTTTGCTGCCCATTTGGGAGTATGTGGCAATTCCTAGTGCTCTTG
2650288	0.0488968	0.00677582	1.24413	up	PLP1	5354	Homo sapiens proteolipid protein 1 (PLP1), transcript variant 2, mRNA.	GO:0022010|GO:0042759|GO:0048469|GO:0022010|GO:0042759|GO:0048469|GO:0022010|GO:0042759|GO:0048469|GO:0022010|GO:0042759|GO:0048469|GO:0022010|GO:0042759|GO:0048469|GO:0022010|GO:0042759|GO:0048469|GO:0007268|GO:0008366|GO:0022010|GO:0042759|GO:0048469	GO:0043209|GO:0043209|GO:0043209|GO:0043209|GO:0043209|GO:0043209|GO:0016020|GO:0016021|GO:0043209	GO:0005515|GO:0005515|GO:0005515|GO:0005515|GO:0005515|GO:0005515|GO:0005198|GO:0005515	chrX	102933862	102933911	CAAACCAGTATACAAGATAAGCTTCCAGGCTGCATAGAAGGAGGAGAGGG
1940132	0.00249514	0.000123052	1.58097	up	CD151	977	Homo sapiens CD151 molecule (Raph blood group) (CD151), transcript variant 4, mRNA.	GO:0007155|GO:0007601|GO:0007605	GO:0005624|GO:0005886|GO:0005887	GO:0005515	chr11	824533	824582	AGAGTCCTGGGGAGCTTCTGTCCACCTGTCCTGCAGAGGAGTCGTTTCCA
5860707	0.0229447	0.00236079	1.26955	down	SAAL1	113174	Homo sapiens serum amyloid A-like 1 (SAAL1), mRNA.	GO:0006953	GO:0005576	GO:0005488	chr11	18103005	18105085	CAAAGGAGACGGTGGCTCAGGGAGTAAAGGAAGGCCAGTTGAGCAAACAG
4260215	0.00412248	0.000239557	1.43154	up	PLTP	5360	Homo sapiens phospholipid transfer protein (PLTP), transcript variant 1, mRNA.	GO:0006629|GO:0006869	GO:0005576	GO:0008289	chr20	44538173	44538222	GAAAGTGTCCAATGTCTCCTGCCAGGCCTCTGTCTCCAGAATGCACGCGG
7610615	0.0016635	7.16405e-05	1.4242	down	SLC6A10P	386757	Homo sapiens solute carrier family 6 (neurotransmitter transporter, creatine), member 10 (pseudogene) (SLC6A10P) on chromosome 16.				chr16	32888901	32888950	GTCCCGAGACGGCTGAGTGACCCCAAGAAAGGCTTCCCTGACACCCGGAC
6330025	0.0260991	0.00283927	1.24528	down	EXOSC6	118460	Homo sapiens exosome component 6 (EXOSC6), mRNA.	GO:0006364|GO:0006396	GO:0000178|GO:0005634|GO:0005737	GO:0000175|GO:0003723|GO:0004527|GO:0016787	chr16	70284155	70284204	TGTGTGTTTTCTGCGGCCCTGGATAATGCTGTAGCATTCAGGGTCGATTG
460487	0.0331753	0.00392417	1.21108	up	FAM55C	91775	Homo sapiens family with sequence similarity 55, member C (FAM55C), mRNA.		GO:0005576		chr3	103024820	103024869	ATAGGAGGGCCCCAGATCTTACTTTCCTGTCCTTGAGGAACACCTTCAAG
2810315	0.0496691	0.00691442	1.2028	up	S100A6	6277	Homo sapiens S100 calcium binding protein A6 (S100A6), mRNA.	GO:0007049|GO:0007165|GO:0007409|GO:0008283|GO:0048146	GO:0001726|GO:0005634|GO:0005635|GO:0005737|GO:0005737	GO:0005509|GO:0008083|GO:0008270|GO:0042803|GO:0048154|GO:0048306	chr1	153507182	153507231	GGAGTATGTCACCTTCCTGGGGGCCTTGGCTTTGATCTACAATGAAGCCC
4390594	0.00512646	0.000315278	1.43667	up	PARL	55486	Homo sapiens presenilin associated, rhomboid-like (PARL), nuclear gene encoding mitochondrial protein, transcript variant 1, mRNA.		GO:0005634|GO:0005739|GO:0005743|GO:0016020|GO:0016021	GO:0004252|GO:0008233	chr3	185042789	185042838	CTTCCAGCATAGTGAACATTCTGGGTCAAGAGCAGTTCATGGCAGTGTAC
6020735	2.07139e-12	2.1945e-16	3.31359	down	GINS2	51659	Homo sapiens GINS complex subunit 2 (Psf2 homolog) (GINS2), mRNA.	GO:0006260	GO:0005634	GO:0005515	chr16	84268826	84268875	GGTGGCTCACAGAGAAGGATGGCAGATGGTGCAGCCAACAATGCTGACCG
2510066	0.00771514	0.000550089	1.30973	up	STRADA	92335	Homo sapiens STE20-related kinase adaptor alpha (STRADA), transcript variant 2, mRNA.				chr17	59133991	59134040	CCCTGGTGCTTTCTCCAAGGGCCATCAGTGTCTTGCCTAGCTTGAGGGCT
3420288	0.000239643	5.54682e-06	1.44917	up	PDPN	10630	Homo sapiens podoplanin (PDPN), transcript variant 4, mRNA.	GO:0000902|GO:0001946|GO:0006693|GO:0006833|GO:0006865|GO:0007049|GO:0007165|GO:0007275|GO:0008283|GO:0008360|GO:0015884|GO:0016337|GO:0048286|GO:0051272	GO:0001726|GO:0005886|GO:0005887|GO:0030027|GO:0030175|GO:0016021|GO:0016021	GO:0008517|GO:0015171|GO:0015250	chr1	13816939	13816988	AGTGCCTGCGGGGACAGGACTGTGGGTTTCTTGGTCACACCTGTGTTGGT
1050068	0.0411408	0.00526355	1.23375	down	F2RL1	2150	Homo sapiens coagulation factor II (thrombin) receptor-like 1 (F2RL1), mRNA.	GO:0007165|GO:0007186|GO:0007204|GO:0030193	GO:0005794|GO:0005886|GO:0005887	GO:0004872|GO:0005102|GO:0015057	chr5	76166727	76166776	AAAGCCTTCAGAGGGTTTGGACCACATCTCTTTGGAAAATAGTTTGCAAC
2060136	0.00150912	6.35546e-05	1.85614	up	ATG4B	23192	Homo sapiens ATG4 autophagy related 4 homolog B (S. cerevisiae) (ATG4B), transcript variant 2, mRNA.	GO:0000045|GO:0006508|GO:0006511|GO:0006612|GO:0006914|GO:0015031	GO:0005737|GO:0005829|GO:0005875	GO:0005515|GO:0005515|GO:0008233|GO:0008234	chr2	242225803	242239137	ATGGACGCAGCTACTCTGACCTACGACACTCTCCGGTTTGCTGAGTTTGA
5560075	0.00912437	0.000686817	1.29635	up	MFGE8	4240	Homo sapiens milk fat globule-EGF factor 8 protein (MFGE8), mRNA.	GO:0007155|GO:0007155|GO:0007338|GO:0044419	GO:0005737|GO:0016020	GO:0005515	chr15	87242940	87242989	GGGCCCTCATGCTGGCTTTTCACCCCAGAGGACACAGGCAGCTTCCAAAA
5220347	0.000838852	2.87053e-05	1.3897	up	BCKDK	10295	Homo sapiens branched chain ketoacid dehydrogenase kinase (BCKDK), mRNA.	GO:0007165|GO:0009083|GO:0009083|GO:0016310|GO:0016310|GO:0018106	GO:0005739|GO:0005759|GO:0005947|GO:0005947|GO:0005739	GO:0000155|GO:0004674|GO:0005515|GO:0005524|GO:0047323|GO:0004672|GO:0005524|GO:0005524|GO:0016301	chr16	31031334	31031383	AGCACCAGTTCCGTCATTCTCGTTCCTGGGGAACCCCCACTCTGACCTGT
1740685	0.00288559	0.00015022	1.45646	down	FAM116A	201627	PREDICTED: Homo sapiens family with sequence similarity 116, member A (FAM116A), mRNA.							AATTTGCACTGGGAACCTGGGAAAGAGTGACTGATAATTTTTGGTGCGTG
7100386	0.00261873	0.000131783	1.34597	up	TCF25	22980	Homo sapiens transcription factor 25 (basic helix-loop-helix) (TCF25), mRNA.	GO:0000122|GO:0006350|GO:0006355|GO:0007507	GO:0005634	GO:0003700	chr16	88505174	88505223	GGGAGTGGGACTGAGCGTCCGCAGAGGTGACCGAAAAGCCGTATGATGAT
830176	0.0111478	0.00089582	1.36676	up	C2orf18	54978	Homo sapiens chromosome 2 open reading frame 18 (C2orf18), mRNA.		GO:0005764|GO:0016020|GO:0016021		chr2	26856473	26856522	CTGGGCAACAGAGTGAAACCTGTCCCTGTTTTCCTGCTCTTACTCTCACC
3120050	0.00548777	0.000346801	1.32941	up	MLL5	55904	Homo sapiens myeloid/lymphoid or mixed-lineage leukemia 5 (trithorax homolog, Drosophila) (MLL5), transcript variant 1, mRNA.	GO:0007049|GO:0007050|GO:0016568	GO:0005634|GO:0016607|GO:0005634	GO:0005515|GO:0008168|GO:0008270|GO:0016740|GO:0018024|GO:0046872	chr7	104442186	104465825	GGGGTTCGGGTGTCTCGTGTGTGAACATCACAGGTCTATTCTGGATAAGC
2690292	0.0358254	0.00436099	1.22626	down	NCOA5	57727	Homo sapiens nuclear receptor coactivator 5 (NCOA5), mRNA.	GO:0006350|GO:0006355|GO:0006412	GO:0005634	GO:0004812|GO:0005524|GO:0004872	chr20	44689888	44689937	AGAAGGAGGGTTTCTGGCTGTGGTTCTAAATGGAGCCCCAGGAAGCTGCC
3990619	4.39535e-09	2.9318e-12	2.44515	down	TOP2A	7153	Homo sapiens topoisomerase (DNA) II alpha 170kDa (TOP2A), mRNA.	GO:0006260|GO:0006265|GO:0006266|GO:0006281|GO:0007059|GO:0007059|GO:0007059|GO:0007059|GO:0030261|GO:0030263|GO:0040016|GO:0043065|GO:0045870|GO:0045944|GO:0048015	GO:0000793|GO:0005634|GO:0005634|GO:0005634|GO:0005634|GO:0005654|GO:0005694|GO:0005730|GO:0005730|GO:0005737|GO:0005814|GO:0009330|GO:0019035	GO:0000166|GO:0003682|GO:0003918|GO:0003918|GO:0005080|GO:0005524|GO:0008022|GO:0008022|GO:0008094|GO:0008144|GO:0042803|GO:0042826|GO:0042826|GO:0043130|GO:0046982	chr17	38545066	38545115	TTTCAGCTCTTGACCTGTCCCCTCTGGCTGCCTCTGAGTCTGAATCTCCC
1110494	4.60899e-05	6.91026e-07	1.49844	down	TMEM194	23306	Homo sapiens transmembrane protein 194 (TMEM194), mRNA.				chr12	55736162	55736211	GCCAACACCAACTCGTAGCTTTAGTGGCAGATGGGAGTGGTCACAGACTC
2230156	0.001014	3.73844e-05	1.35702	up	C15orf52	388115	Homo sapiens chromosome 15 open reading frame 52 (C15orf52), mRNA.				chr15	38411004	38411053	ACCTGCCCGCAGTTGGAGTTGGACTGTCTTAACAGTAGCGTGGCACACAG
3060446	0.0428822	0.00557567	1.25771	up	NPTXR	23467	Homo sapiens neuronal pentraxin receptor (NPTXR), mRNA.	GO:0006333	GO:0000785|GO:0005634|GO:0005737|GO:0005886|GO:0005737|GO:0005886|GO:0016021	GO:0003682|GO:0004872|GO:0005509	chr22	39214920	39214969	CCACCCAGCTGGACACGGGAGACTTGAGCCCAGCCTTCTGACTGCATTCA
3890309	8.21698e-06	7.13055e-08	1.62413	down	RFC3	5983	Homo sapiens replication factor C (activator 1) 3, 38kDa (RFC3), transcript variant 1, mRNA.	GO:0006260|GO:0000731|GO:0006271|GO:0006297	GO:0005634|GO:0005634|GO:0005654|GO:0005663|GO:0005663	GO:0000166|GO:0003677|GO:0005524|GO:0017111|GO:0000166|GO:0003689|GO:0005515|GO:0016887	chr13	33309319	33309368	GCCGTCACCCCAAAAAGTTCCCTCCATATCCCTTTGCAGTCAGTTCATCC
6200431	0.00656948	0.000440563	1.32419	down	AKT1	207	Homo sapiens v-akt murine thymoma viral oncogene homolog 1 (AKT1), transcript variant 3, mRNA.	GO:0000060|GO:0001568|GO:0001890|GO:0005975|GO:0005978|GO:0006006|GO:0006417|GO:0006464|GO:0006924|GO:0006954|GO:0007186|GO:0007242|GO:0007281|GO:0008286|GO:0008633|GO:0008637|GO:0008643|GO:0009408|GO:0009725|GO:0015758|GO:0016567|GO:0018105|GO:0030163|GO:0034405|GO:0040018|GO:0042640|GO:0043491|GO:0045429|GO:0045884|GO:0046777|GO:0048009|GO:0051000	GO:0005634|GO:0005654|GO:0005654|GO:0005654|GO:0005737|GO:0005819|GO:0005829|GO:0005829|GO:0005829|GO:0005829|GO:0005829|GO:0005829|GO:0005829|GO:0005829|GO:0005829|GO:0005829|GO:0005856|GO:0005886|GO:0005886|GO:0005886|GO:0030027	GO:0000166|GO:0004674|GO:0004674|GO:0004674|GO:0004674|GO:0004674|GO:0005351|GO:0005524|GO:0016740|GO:0030235|GO:0042802	chr14	105235866	105235915	CCACGGTAGCACTTGACCTTTTCGACGCTTAACCTTTCCGCTGTCGCCCC
6510025	0.0227498	0.00232883	1.2581	down	NSMCE4A	54780	Homo sapiens non-SMC element 4 homolog A (S. cerevisiae) (NSMCE4A), mRNA.				chr10	123722839	123723553	TCAGAGCCTGTGATTACTCCAAGTCAGAGGCAGCAGAAGCCAAGTGCTTG
10133	0.0101832	0.000797808	1.29301	up	SLC9A1	6548	Homo sapiens solute carrier family 9 (sodium/hydrogen exchanger), member 1 (SLC9A1), mRNA.	GO:0006814|GO:0006885|GO:0006814|GO:0006885|GO:0006811|GO:0006814|GO:0006885	GO:0005624|GO:0005624|GO:0016021|GO:0005624|GO:0016020|GO:0016021	GO:0015385|GO:0015385|GO:0015297|GO:0015299|GO:0015385|GO:0031402	chr1	27298017	27298066	TCCTCGGCCCATCTGTCCATCCTCCTCTCCATGCAAGTGCTGTTTGGGCA
1510014	0.00245585	0.000120204	1.3165	down	PCNT	5116	Homo sapiens pericentrin (PCNT), mRNA.	GO:0007051|GO:0042384	GO:0005814	GO:0005516	chr21	46689895	46689944	GAGGTGACGGGCACTCACTCCCATGAGCCCTGGCTGTGTGCTGTTGTGTG
1190446	0.00598176	0.000385925	1.29566	down	DLC1	10395	Homo sapiens deleted in liver cancer 1 (DLC1), transcript variant 3, mRNA.	GO:0001843|GO:0003007|GO:0006917|GO:0006917|GO:0006919|GO:0007165|GO:0008285|GO:0008285|GO:0008285|GO:0008360|GO:0021575|GO:0030336|GO:0030336|GO:0030336|GO:0030900|GO:0032956|GO:0035024|GO:0035307|GO:0048041|GO:0051497|GO:0001843|GO:0003007|GO:0007165|GO:0021575|GO:0030036|GO:0030900|GO:0048041	GO:0005622|GO:0005634|GO:0005737|GO:0005737|GO:0005901|GO:0005925|GO:0005925|GO:0005622	GO:0005096|GO:0005515|GO:0030675|GO:0042169	chr8	13116451	13116500	GTGTGTGCCTGGCAGAACACTGCACTCCAATTTCCTCGGGCAGCCACAAA
6270600	8.10615e-07	3.60693e-09	1.78279	down	TMEM64	169200	Homo sapiens transmembrane protein 64 (TMEM64), mRNA.		GO:0016020|GO:0016021|GO:0016021		chr8	91705441	91705490	GACCAGTGCAAATACTTTGAGAGCACCTGGGTCTACAGGACATAATTGGC
6100564	2.88529e-07	1.02402e-09	1.93452	down	CENPE	1062	Homo sapiens centromere protein E, 312kDa (CENPE), mRNA.	GO:0000089|GO:0007018|GO:0007049|GO:0007079|GO:0007080|GO:0051301|GO:0051382	GO:0000775|GO:0000940|GO:0005634|GO:0005819|GO:0005874|GO:0005875	GO:0000166|GO:0003777|GO:0005515|GO:0005524|GO:0043515	chr4	104246876	104249411	CCAGAGGTGCAAAATGCAGGAGCAGAGAGTGTGGATTCTCAGCCAGGTCC
4880288	0.0293635	0.00333174	1.25344	up	ABHD8	79575	Homo sapiens abhydrolase domain containing 8 (ABHD8), mRNA.			GO:0016787	chr19	17402956	17403005	GGGGGGCTGGCGCCACCGAACCTGCACATCTCAACTTGTAACTCAATAAA
870148	0.0255755	0.0027651	1.25419	down	MSH6	2956	Homo sapiens mutS homolog 6 (E. coli) (MSH6), mRNA.	GO:0006298|GO:0008340|GO:0008630|GO:0009411|GO:0016446|GO:0016447|GO:0045190|GO:0045910|GO:0006284|GO:0006298|GO:0006298|GO:0006298|GO:0006298|GO:0008340|GO:0008630|GO:0009411|GO:0016446|GO:0016447|GO:0045190|GO:0045910	GO:0000790|GO:0032301|GO:0000790|GO:0005634|GO:0032301|GO:0032301	GO:0003682|GO:0003684|GO:0032137|GO:0000166|GO:0000287|GO:0000400|GO:0000701|GO:0003682|GO:0003684|GO:0005515|GO:0005524|GO:0016887|GO:0032137|GO:0032137|GO:0032137|GO:0032139|GO:0032142|GO:0032143|GO:0032357|GO:0032357|GO:0032405|GO:0042803|GO:0043531	chr2	47887292	47887468	TCGGGAAGTTTGCCTGGCTAGTGAAAGGTCAACTGTAGATGCTGAAGCTG
1450168	0.0233673	0.00242916	1.23062	down	UPF1	5976	Homo sapiens UPF1 regulator of nonsense transcripts homolog (yeast) (UPF1), mRNA.	GO:0000184|GO:0006260|GO:0006281|GO:0006396|GO:0006406|GO:0006449|GO:0006449|GO:0007049	GO:0000785|GO:0005737	GO:0000166|GO:0003677|GO:0003682|GO:0003723|GO:0004004|GO:0004386|GO:0005515|GO:0005515|GO:0005524|GO:0008270|GO:0016787|GO:0046872	chr19	18839698	18839747	GACAGACGGGGACGCACAGGCCACCTTCCTTCTGGCAGGGACTCTTATTT
3060377	1.0612e-06	5.22896e-09	1.76515	up	MFAP4	4239	Homo sapiens microfibrillar-associated protein 4 (MFAP4), mRNA.	GO:0007165|GO:0007155|GO:0007165	GO:0001527|GO:0005576|GO:0005578	GO:0005102|GO:0003674|GO:0005102|GO:0005509	chr17	19286870	19286919	TGGCTCCTCCTTGCTCCCCTGCTGATGGTGTCCTACCCCGAACTCCAAAA
1510168	0.0182234	0.00172118	1.25983	up	METRNL	284207	Homo sapiens meteorin, glial cell differentiation regulator-like (METRNL), mRNA.		GO:0005576		chr17	78631095	78631144	CTGCTGGGCGGCGCGGGCGCGCAGTACTCCAGCGACCGGTGCAGCTGGAA
1780678	0.00779393	0.000556945	1.27189	up	LOC374395	374395	Homo sapiens similar to RIKEN cDNA 1810059G22 (LOC374395), mRNA.				chr11	62314210	62314259	GGGGGGAAACATAATGACAGGCCCCCCTCCACCTCTTCCTGCAGCTGTTT
3800168	0.00150912	6.36328e-05	1.39105	up	SLC2A3	6515	Homo sapiens solute carrier family 2 (facilitated glucose transporter), member 3 (SLC2A3), mRNA.	GO:0005975|GO:0008643|GO:0015758|GO:0055085	GO:0005737|GO:0005886|GO:0016021	GO:0005215|GO:0005351|GO:0005355|GO:0022891	chr12	7963180	7963229	CTTTCTGGCTCCTCAAACAGTAGGTTGGCAGTAAGGCAGGGTCCCATTTC
3850053	0.000262482	6.25484e-06	1.48054	down	ANP32B	10541	Homo sapiens acidic (leucine-rich) nuclear phosphoprotein 32 family, member B (ANP32B), mRNA.		GO:0005634	GO:0005515|GO:0005515	chr9	99817790	99817839	TGCTGTAGCGTGGATAGCTGTGATTGGTGAGTCAACCGTCTGTGGCTACC
3370577	0.0241871	0.00255734	1.31852	up	APP	351	Homo sapiens amyloid beta (A4) precursor protein (APP), transcript variant 3, mRNA.	GO:0006878|GO:0006897|GO:0006915|GO:0007155|GO:0007219|GO:0050905	GO:0005576|GO:0005576|GO:0005737|GO:0005794|GO:0005886|GO:0005887|GO:0005905|GO:0009986|GO:0031093	GO:0004867|GO:0004867|GO:0005506|GO:0005507|GO:0008201|GO:0008270|GO:0033130|GO:0042802|GO:0046872	chr21	26175811	26175860	GCAGAACTAGACCCCCGCCACAGCAGCCTCTGAAGTTGGACAGCAAAACC
650110	0.00182698	8.33263e-05	1.53214	up	APP	351	Homo sapiens amyloid beta (A4) precursor protein (APP), transcript variant 3, mRNA.	GO:0006878|GO:0006897|GO:0006915|GO:0007155|GO:0007219|GO:0050905	GO:0005576|GO:0005576|GO:0005737|GO:0005794|GO:0005886|GO:0005887|GO:0005905|GO:0009986|GO:0031093	GO:0004867|GO:0004867|GO:0005506|GO:0005507|GO:0008201|GO:0008270|GO:0033130|GO:0042802|GO:0046872	chr21	26185961	26186010	TCATTGGACTCATGGTGGGCGGTGTTGTCATAGCGACAGTGATCGTCATC
3870484	0.00766992	0.000545646	1.29331	up	LUZP1	7798	Homo sapiens leucine zipper protein 1 (LUZP1), mRNA.		GO:0005634		chr1	23284088	23284137	TGGAGCTGCCTGTCTGCATGTATCCTCTGGCGCGAATGCTCTCTGTTGGC
5670577	3.77596e-06	2.82027e-08	1.63739	up	TSPAN31	6302	Homo sapiens tetraspanin 31 (TSPAN31), mRNA.	GO:0008284	GO:0005624|GO:0005887|GO:0016020		chr12	56428139	56428188	TCAGTCAAGGGGCTCCACTGACTTCCTAGGCCCTGTAATTTAACCAGTCT
2810328	0.0146369	0.00127491	1.27093	down	RBM12	10137	Homo sapiens RNA binding motif protein 12 (RBM12), transcript variant 1, mRNA.		GO:0005634	GO:0000166|GO:0003723|GO:0005515	chr20	34236935	34236984	ATGGCCACAACATTGCCAGCAAATACTGCCTTGGCATCACTCAGCAGAGG
1740551	0.00474447	0.000287011	1.33661	up	MGC42105	167359	Homo sapiens serine/threonine-protein kinase NIM1 (MGC42105), mRNA.				chr5	43280515	43280564	CCAAAGGAAGAAGGCTTTGGAAAGTGTCCCAGTCATGATGCTACCAGACC
5550332	2.14889e-10	6.82984e-14	3.8015	down	PTGFRN	5738	Homo sapiens prostaglandin F2 receptor negative regulator (PTGFRN), mRNA.		GO:0005783|GO:0005789|GO:0005794|GO:0016020|GO:0016021	GO:0005515|GO:0005515	chr1	117334202	117334251	CACCGATGACAACAGAGGAAGAAGGGAACTGGGATTTGGGTAAGTTCTCC
7050010	0.047471	0.0064874	1.20369	up	BNC2	54796	Homo sapiens basonuclin 2 (BNC2), mRNA.	GO:0006350|GO:0006355	GO:0005622|GO:0005634|GO:0005622|GO:0005622|GO:0005622|GO:0005622|GO:0005634|GO:0005622	GO:0003677|GO:0008270|GO:0046872|GO:0008270|GO:0008270|GO:0008270|GO:0003677|GO:0008270|GO:0008270	chr9	16419475	16419524	TGTCTAGGAGCTTTATCTTTTCACCTCCTTCAGAGGATGCTATGGGGTCC
6180465	0.00344274	0.000188569	1.39161	up	SLC2A6	11182	Homo sapiens solute carrier family 2 (facilitated glucose transporter), member 6 (SLC2A6), mRNA.	GO:0008643|GO:0055085|GO:0008643|GO:0008643|GO:0008643|GO:0055085	GO:0005886|GO:0016021|GO:0016020|GO:0016021|GO:0016021|GO:0016020|GO:0016021	GO:0005215|GO:0005351|GO:0005355|GO:0022891|GO:0005215|GO:0005351|GO:0005215|GO:0005351|GO:0005215|GO:0005351|GO:0005355|GO:0022891	chr9	135326072	135326121	TGCCCCAGCCCAACCTCTGGGAACAGGCAGCTCCTATCTGCAAACTGTGT
6580168	0.0331942	0.00392816	1.25854	up	ARRDC4	91947	Homo sapiens arrestin domain containing 4 (ARRDC4), mRNA.				chr15	96317363	96317412	CTTCTGAGTTATATAGTTCATGCCCTGCCAAGGCATTGTTCGACTCCATG
4070037	0.000793883	2.62413e-05	1.48982	up	TMED10	10972	Homo sapiens transmembrane emp24-like trafficking protein 10 (yeast) (TMED10), mRNA.	GO:0015031|GO:0016192|GO:0045055|GO:0048199	GO:0000139|GO:0005792|GO:0005793|GO:0005794|GO:0005801|GO:0016020|GO:0016021|GO:0042470|GO:0042589	GO:0005515	chr14	75599231	75599280	GCCATCTGCTGTTGAGAATTGGTAGGTACTGCTTCTGAGAACCTGGCTGC
[truncated: 1,361 more rows]

## Sheet: 527 >1.5 FC
ProbeID	FC ([tlk1] vs [ntg])	Log FC ([tlk1] vs [ntg])	FC (abs) ([tlk1] vs [ntg])	Regulation ([tlk1] vs [ntg])	Gene Symbol	Entrez_Gene_ID	Definition	Ontology_Process	Ontology_Component	Ontology_Function	Chromosome	Chromosome Start Index(Avadis)	Chromosome End Index(Avadis)	Probe_Sequence
[truncated: 527 more rows]

[truncated: 1 more sheets: >1.3FC]
